# Supplementary material for: Downregulation of ribosome biogenesis during early forebrain development
Source: eLife journal article supplement (doi:10.7554/elife.36998), 2018-05-10
Supplement: supp [file elife_poa_e36998_Supplementary_File_2.xlsx]

## Sheet: FPKM>1
test_id	gene	locus	WT FPKM	MYC-OE FPKM	log2(fold_change)	p_value	q_value	significant
XLOC_000007	St18	chr1:6487230-6860940	3.42176	5.15206	0.590412	5e-05	0.00984655	yes
XLOC_000019	Sulf1	chr1:12692429-12860372	1.14698	2.49115	1.11897	5e-05	0.00984655	yes
XLOC_000091	2900092D14Rik	chr1:42700335-42703176	203.397	156.296	-0.380023	0.00085	0.0741122	yes
XLOC_001009	Optc	chr1:133897193-133907999	1.99758	5.41979	1.43998	0.0001	0.0170478	yes
XLOC_001010	Prelp	chr1:133910303-133921401	2.77917	5.07714	0.869364	5e-05	0.00984655	yes
XLOC_001029	5730559C18Rik	chr1:136213521-136234280	12.9892	8.43287	-0.623219	0.0001	0.0170478	yes
XLOC_001602	Apba3*	chr10:81268171-81291267	125.915	3.61641	-5.12175	5e-05	0.00984655	yes
XLOC_001888	Rps12	chr10:23785182-23787209	181.87	251.775	0.46923	0.0001	0.0170478	yes
XLOC_001910	Rspo3	chr10:29453106-29535867	6.298	12.1219	0.944652	5e-05	0.00984655	yes
XLOC_002042	Mif	chr10:75859352-75860250	59.4671	90.0459	0.59857	0.00035	0.0434533	yes
XLOC_002253	Dyrk2	chr10:118859348-118868903	20.1218	14.3701	-0.485686	0.0005	0.0533738	yes
XLOC_002309	Rps26	chr10:128624528-128626506	147.364	213.501	0.534863	5e-05	0.00984655	yes
XLOC_002367	Pes1	chr11:3963974-3980004	11.1036	15.3797	0.470001	0.00075	0.0679881	yes
XLOC_002637	2410006H16Rik	chr11:62602876-62604806	29.9401	53.8978	0.848147	0.0003	0.0398442	yes
XLOC_002731	Txndc17	chr11:72207553-72210487	6.28598	11.6892	0.894968	0.0001	0.0170478	yes
XLOC_002996	Psmd3	chr11:98682553-98695978	14.7948	21.0772	0.510592	0.00055	0.0560902	yes
XLOC_003284	Slc1a4	chr11:20302179-20332713	13.9674	18.6589	0.4178	0.0012	0.095849	yes
XLOC_003419	Sparc	chr11:55394500-55420080	39.7291	54.0941	0.445273	0.0003	0.0398442	yes
XLOC_003510	Pfas*	chr11:68985700-69008460	19.2837	88.5932	2.19981	5e-05	0.00984655	yes
XLOC_003541	Eif5a	chr11:69916711-69921958	189.995	248.85	0.389315	0.0009	0.0772917	yes
XLOC_003552	Pelp1	chr11:70392880-70410031	14.7917	20.2279	0.451554	0.0007	0.0666283	yes
XLOC_003731	Nme2	chr11:93949814-93956007	41.2955	73.671	0.835113	5e-05	0.00984655	yes
XLOC_003944	Kpna2	chr11:106988628-106999525	113.058	158.703	0.489266	5e-05	0.00984655	yes
XLOC_004106	Sdc1	chr12:8771395-8793687	8.27948	11.9467	0.528998	0.0005	0.0533738	yes
XLOC_004124	Pdia6	chr12:17266594-17324730	26.8811	40.8801	0.604808	5e-05	0.00984655	yes
XLOC_004317	Fos	chr12:85473900-85477270	24.2211	37.2327	0.620305	5e-05	0.00984655	yes
XLOC_004736	Tmed10	chr12:85340613-85374717	15.4847	21.2249	0.454915	0.00045	0.0508901	yes
XLOC_004887	Nid1	chr13:13437601-13512275	0.847196	2.51643	1.57061	5e-05	0.00984655	yes
XLOC_005083	Arl10	chr13:54575012-54581128	7.55957	13.2034	0.804536	0.00105	0.0869065	yes
XLOC_005098	Tmed9	chr13:55593134-55597694	20.3038	29.0543	0.516996	0.0005	0.0533738	yes
XLOC_005562	Gm5141	chr13:62772199-62785808	5.62323	3.44007	-0.70896	0.00035	0.0434533	yes
XLOC_005716	Rnf180	chr13:105147493-105293014	10.4505	7.27292	-0.522968	0.00025	0.0361456	yes
XLOC_005830	Wnt5a	chr14:28505472-28525515	2.41801	4.0475	0.743211	0.00055	0.0560902	yes
XLOC_006137	Mir17hg,Mir19b-1*	chr14:115044304-115046728	193.476	95.5372	-1.01802	5e-05	0.00984655	yes
XLOC_006307	Otx2	chr14:48658183-48662872	6.05118	12.2228	1.01429	5e-05	0.00984655	yes
XLOC_006555	Commd6	chr14:101633765-101640471	9.00225	16.6721	0.889077	0.00025	0.0361456	yes
XLOC_006556	Kctd12	chr14:102976580-102982637	2.36526	1.37478	-0.782795	0.0006	0.059593	yes
XLOC_006792	Tomm22	chr15:79670867-79672862	25.4269	37.6192	0.565114	0.0005	0.0533738	yes
XLOC_006903	Tuba1c	chr15:99029890-99038105	7.58084	11.5755	0.610649	0.0012	0.0958489	yes
XLOC_006911	Tmbim6	chr15:99392946-99410049	32.3317	43.8103	0.438322	0.00035	0.0434533	yes
XLOC_007022	Rpl30	chr15:34440505-34443276	261.054	356.352	0.448955	5e-05	0.00984655	yes
XLOC_007155	Plec	chr15:76170973-76231378	2.41874	3.25222	0.42717	0.0012	0.0958489	yes
XLOC_007227	Rpl3	chr15:80077780-80083406	134.376	186.216	0.4707	5e-05	0.00984655	yes
XLOC_007324	Nell2	chr15:95219449-95528706	7.50874	12.2027	0.700559	5e-05	0.00984655	yes
XLOC_007367	Tuba1b	chr15:98931430-98934390	125.115	174.1	0.476666	0.00015	0.0244757	yes
XLOC_007368	Tuba1a	chr15:98949846-98953501	170.582	220.877	0.372784	0.00085	0.0741122	yes
XLOC_008068	Zfp654	chr16:64780346-64786321	6.12855	4.30393	-0.509891	0.00125	0.0991493	yes
XLOC_008422	Wdr46	chr17:33940722-33949695	22.1202	30.8649	0.480607	0.00045	0.0508901	yes
XLOC_008788	Has1	chr17:17843325-17855188	8.02036	4.87989	-0.716818	0.0008	0.0713875	yes
XLOC_009098	Slc29a1	chr17:45585199-45599603	8.0367	12.3319	0.617716	0.00045	0.0508901	yes
XLOC_009325	Ttr	chr18:20665249-20674326	7.19618	15.2427	1.08282	5e-05	0.00984655	yes
XLOC_009365	Egr1	chr18:34861206-34864956	60.9758	85.6702	0.490555	5e-05	0.00984655	yes
XLOC_009367	Snhg4	chr18:35553409-35558316	20.5005	32.8707	0.681143	5e-05	0.00984655	yes
XLOC_009487	Cd74*	chr18:60803848-60812652	79.8223	0.724784	-6.7831	5e-05	0.00984655	yes
XLOC_009489	Camk2a	chr18:60925631-60988152	14.9777	11.0455	-0.439358	0.00075	0.0679881	yes
XLOC_009500	Apcdd1	chr18:62922326-62953195	9.62059	15.3605	0.675028	5e-05	0.00984655	yes
XLOC_009695	Pggt1b	chr18:46239948-46280850	15.0866	10.6054	-0.508476	0.00055	0.0560902	yes
XLOC_009929	Fads3	chr19:10041547-10059671	4.4356	2.58746	-0.777594	0.0003	0.0398442	yes
XLOC_010013	Trpm3	chr19:22139116-22989884	3.02138	5.67215	0.908691	5e-05	0.00984655	yes
XLOC_010478	Rrp12	chr19:41862850-41896153	7.13964	10.2836	0.526419	0.0003	0.0398442	yes
XLOC_010535	Sorcs1	chr19:50143300-50678646	3.77953	2.44899	-0.626023	0.0005	0.0533738	yes
XLOC_010773	Rpl12	chr2:32961711-32964045	142.827	190.597	0.416262	0.00095	0.080377	yes
XLOC_010857	Csrnp3	chr2:65845766-66031546	1.55961	2.50529	0.683787	0.0002	0.0312932	yes
XLOC_010932	Ube2l6	chr2:84798827-84810003	34.9081	22.7616	-0.616958	5e-05	0.00984655	yes
XLOC_011120	Thbs1	chr2:118111921-118127133	3.52979	5.29664	0.585494	0.00025	0.0361456	yes
XLOC_011163	Pdia3	chr2:121413901-121438686	42.8066	65.6014	0.615893	5e-05	0.00984655	yes
XLOC_011284	Insm1	chr2:146221996-146225018	25.9015	35.7814	0.466177	0.00025	0.0361456	yes
XLOC_011293	Nxt1	chr2:148672614-148676026	11.253	18.4934	0.716707	0.00075	0.0679881	yes
XLOC_011442	Pigt	chr2:164497524-164508301	28.972	39.4441	0.445148	0.00065	0.0623891	yes
XLOC_011567	Pcmtd2	chr2:181837902-181857450	8.18339	5.66874	-0.529669	0.0006	0.059593	yes
XLOC_011631	Tubb4b	chr2:25218744-25224702	55.7381	75.1682	0.43146	0.00035	0.0434533	yes
XLOC_011801	Ermn	chr2:58045114-58052752	6.76252	4.45163	-0.60323	0.0004	0.0475917	yes
XLOC_011882	Tmx2	chr2:84671316-84678047	14.8682	21.0506	0.501636	0.00055	0.0560902	yes
XLOC_012063	Ext2	chr2:93695630-93822568	18.9313	28.361	0.583136	5e-05	0.00984655	yes
XLOC_012088	Hipk3*	chr2:104426481-104494489	57.2768	9.18602	-2.64044	5e-05	0.00984655	yes
XLOC_012445	Sulf2	chr2:166073898-166155683	13.2212	18.8952	0.515168	5e-05	0.00984655	yes
XLOC_012702	Sfrp2	chr3:83766320-83774314	17.2137	24.7019	0.521062	0.0004	0.0475917	yes
XLOC_012756	Kcnn3	chr3:89520163-89672494	2.9594	1.98703	-0.57469	0.0011	0.0897443	yes
XLOC_012765	Nup210l	chr3:90104131-90212017	3.92938	2.43419	-0.690861	5e-05	0.00984655	yes
XLOC_012849	Sf3b4	chr3:96172549-96177564	44.4739	58.7084	0.400606	0.0011	0.0897443	yes
XLOC_013261	Rps3a	chr3:86137939-86142668	108.103	143.381	0.40744	0.00055	0.0560902	yes
XLOC_013596	Cyr61	chr3:145646970-145649985	42.3092	57.3275	0.438255	0.0004	0.0475917	yes
XLOC_013654	C430048L16Rik	chr4:12089369-12096271	15.3774	10.5186	-0.547871	5e-05	0.00984655	yes
XLOC_013714	Gm3893	chr4:41889794-42462993	48.1312	32.0588	-0.586252	5e-05	0.00984655	yes
XLOC_013868	Dmrta1	chr4:89688197-89694766	33.6283	24.9784	-0.428997	0.00025	0.0361456	yes
XLOC_014035	Inpp5b*	chr4:124741877-124801511	8.66587	41.3536	2.2546	5e-05	0.00984655	yes
XLOC_014040	Rspo1	chr4:124986429-125009099	8.74742	16.2154	0.890437	5e-05	0.00984655	yes
XLOC_014235	Srm	chr4:148591512-148594619	30.8994	48.5472	0.651807	5e-05	0.00984655	yes
XLOC_014596	E130102H24Rik,Mir101a*	chr4:101346523-101399185	3.06847	51.5726	4.07101	5e-05	0.00984655	yes
XLOC_014665	Rps8	chr4:117153835-117156132	187.283	261.103	0.479399	5e-05	0.00984655	yes
XLOC_014735	Cdca8	chr4:124918464-124936917	50.1059	69.0735	0.463154	0.0003	0.0398442	yes
XLOC_014812	Nudc	chr4:133532541-133546027	38.8707	51.9791	0.41925	0.001	0.0839853	yes
XLOC_015087	Chpf2*	chr5:24586749-24592486	4.38782	23.9812	2.45033	5e-05	0.00984655	yes
XLOC_015441	Rplp0	chr5:115559466-115563729	77.2841	116.827	0.596126	5e-05	0.00984655	yes
XLOC_015506	Setd8	chr5:124439929-124462307	81.4677	106.064	0.380631	0.00085	0.0741122	yes
XLOC_015518	Tmem132b	chr5:125532417-125792583	5.21491	3.68376	-0.501465	0.00075	0.0679881	yes
XLOC_015736	Pus7	chr5:23740695-23783661	14.492	19.8549	0.454241	0.00045	0.0508901	yes
XLOC_015866	Rpl9	chr5:65388363-65391431	148.106	201.798	0.446284	0.0005	0.0533738	yes
XLOC_016003	Sparcl1	chr5:104079108-104114088	0.678318	2.45965	1.85842	5e-05	0.00984655	yes
XLOC_016046	Noc4l	chr5:110648418-110653382	9.67205	14.2418	0.558236	0.0009	0.0772917	yes
XLOC_016128	Aldh2	chr5:121567686-121593824	3.0376	5.82378	0.939025	0.00035	0.0434533	yes
XLOC_016178	Gusb	chr5:129989020-130002828	2.63466	5.05407	0.939826	0.0003	0.0398442	yes
XLOC_016203	Pom121	chr5:135369952-135394546	60.1919	81.0564	0.429356	0.0002	0.0312932	yes
XLOC_016371	Cav1	chr6:17306334-17341328	4.50084	7.89817	0.811323	5e-05	0.00984655	yes
XLOC_016619	Suclg1	chr6:73248504-73276907	5.08058	8.91335	0.810976	0.00075	0.0679881	yes
XLOC_016680	Rpn1	chr6:88084472-88105304	14.971	21.3364	0.511149	0.0001	0.0170478	yes
XLOC_017141	Scrn1	chr6:54508815-54566382	61.5018	43.2795	-0.506945	5e-05	0.00984655	yes
XLOC_017571	Myadm	chr7:3289037-3299349	12.4539	17.7146	0.508346	0.00025	0.0361456	yes
XLOC_017580	Rps9	chr7:3704040-3706897	207.042	284.922	0.460645	5e-05	0.00984655	yes
XLOC_017641	Rps5	chr7:12922310-12926686	101.362	146.533	0.531704	0.0001	0.0170478	yes
XLOC_017712	Ercc2*	chr7:19382038-19399856	226.243	7.03018	-5.00817	5e-05	0.00984655	yes
XLOC_018031	Slc17a6	chr7:51621829-51671126	5.67109	8.18981	0.530203	0.00065	0.0623891	yes
XLOC_018056	Pcsk6	chr7:65862135-66050386	3.2684	5.01022	0.616291	0.00105	0.0869065	yes
XLOC_018311	Rpl27a	chr7:109519194-109522369	77.6067	105.249	0.439553	0.00045	0.0508901	yes
XLOC_018387	Tufm	chr7:126487354-126490731	10.3298	17.72	0.778562	5e-05	0.00984655	yes
XLOC_018714	Fosb	chr7:19302695-19310045	33.3487	64.2677	0.946463	5e-05	0.00984655	yes
XLOC_018978	2310044H10Rik	chr7:44489937-44496513	19.7551	27.4795	0.47613	0.0008	0.0713875	yes
XLOC_019121	Nr2f2	chr7:70351949-70411146	5.26028	7.78697	0.565922	0.00075	0.0679881	yes
XLOC_019161	Rps17	chr7:81342732-81345234	214.387	318.977	0.573238	5e-05	0.00984655	yes
XLOC_019233	Serpinh1	chr7:99345374-99353239	18.1836	25.0819	0.464005	0.00065	0.0623891	yes
XLOC_019234	Rps3	chr7:99477896-99483709	66.1886	90.9604	0.458657	5e-05	0.00984655	yes
XLOC_019428	Dkk3	chr7:112116018-112159057	6.67578	9.7599	0.547929	0.00065	0.0623891	yes
XLOC_019444	Arl6ip1	chr7:118118889-118129625	41.5559	60.7573	0.548004	5e-05	0.00984655	yes
XLOC_019637	Igf2	chr7:142650767-142670356	2.61215	7.41847	1.50589	5e-05	0.00984655	yes
XLOC_019693	Col4a2	chr8:11312828-11449287	2.46009	4.53722	0.883098	5e-05	0.00984655	yes
XLOC_019789	Star	chr8:25808512-25815982	12.4514	8.10081	-0.620169	5e-05	0.00984655	yes
XLOC_020213	Rpl13	chr8:123102349-123105242	226.76	313.097	0.465445	0.0001	0.0170478	yes
XLOC_020281	Col4a1	chr8:11198422-11312826	2.22723	4.20603	0.917209	5e-05	0.00984655	yes
XLOC_020389	Dlc1	chr8:36567738-36952442	1.69955	2.97854	0.809456	0.00015	0.0244757	yes
XLOC_020477	Uba52	chr8:70508265-70510367	183.845	255.498	0.474818	0.0001	0.0170478	yes
XLOC_020554	Calr	chr8:84842087-84846931	58.1648	83.6345	0.523952	5e-05	0.00984655	yes
XLOC_020722	Slc7a5	chr8:121881145-121907686	14.2146	25.2958	0.831523	5e-05	0.00984655	yes
XLOC_020752	2810004N23Rik	chr8:124839354-124863029	23.3772	32.8833	0.492252	0.00095	0.080377	yes
XLOC_020863	Bmper	chr9:23223075-23485202	11.9325	8.39606	-0.507107	0.0004	0.0475917	yes
XLOC_020998	Rps25	chr9:44407713-44418007	122.815	171.752	0.483839	0.00015	0.0244757	yes
XLOC_021409	Rpsa	chr9:120127765-120132369	90.3094	119.81	0.407801	0.0002	0.0312932	yes
XLOC_021917	Ephb1	chr9:101922127-102354693	5.94408	9.59351	0.690606	5e-05	0.00984655	yes
XLOC_022105	Lancl3	chrX:9199972-9268085	6.06702	3.73976	-0.698042	0.0001	0.0170478	yes
XLOC_022605	Wdr13	chrX:8123300-8132858	13.8905	9.94303	-0.482344	0.0003	0.0398442	yes
XLOC_022642	Elk1	chrX:20933394-20950608	29.5149	22.06	-0.420013	0.0006	0.059593	yes
XLOC_022902	Rps4x	chrX:102184942-102188371	175.76	248.514	0.499717	5e-05	0.00984655	yes
XLOC_023085	Kdm5d	chrY:897787-943811	26.3334	18.4859	-0.510466	5e-05	0.00984655	yes
XLOC_023128	Uty	chrY:1097143-1245738	9.15413	5.84761	-0.646577	5e-05	0.00984655	yes
XLOC_023129	Ddx3y	chrY:1260714-1286613	9.51642	6.6444	-0.51828	0.00035	0.0434533	yes
XLOC_000001	Lypla1	chr1:4807892-4846735	8.57247	8.01156	-0.0976291	0.5696	0.945529	no
XLOC_000002	Tcea1	chr1:4857693-4897909	35.9762	41.002	0.188651	0.11495	0.702117	no
XLOC_000003	Atp6v1h	chr1:5083172-5162549	11.7143	11.2054	-0.0640805	0.69425	0.967987	no
XLOC_000005	Rb1cc1	chr1:6214661-6276104	18.7159	19.3882	0.0509152	0.65695	0.96726	no
XLOC_000008	Pcmtd1	chr1:7088919-7173628	13.0472	12.6871	-0.0403809	0.74475	0.976839	no
XLOC_000009	Rrs1	chr1:9545407-9547455	5.46806	7.7392	0.501155	0.0145	0.333909	no
XLOC_000010	Adhfe1	chr1:9548045-9631092	1.12395	1.20893	0.105156	1	1	no
XLOC_000012	1700034P13Rik	chr1:9723195-9771256	3.84237	4.18979	0.124882	0.8405	0.986897	no
XLOC_000013	Sgk3	chr1:9798129-9902568	4.53439	4.00885	-0.177722	0.2641	0.835694	no
XLOC_000014	6030422M02Rik	chr1:9908637-9940954	38.444	32.6272	-0.236682	0.05055	0.538724	no
XLOC_000015	Cspp1	chr1:10038217-10136768	33.437	31.8998	-0.0678938	0.5583	0.94359	no
XLOC_000016	Prex2	chr1:10993464-11303682	4.95872	4.5329	-0.129533	0.364	0.888134	no
XLOC_000017	A830018L16Rik	chr1:11414104-11975902	1.14092	0.792353	-0.525986	1	1	no
XLOC_000018	4932411L15	chr1:12667562-12673090	494.995	451.884	-0.131462	0.33965	0.876185	no
XLOC_000022	Terf1	chr1:15805657-15843429	18.9277	21.4718	0.18195	0.22175	0.804184	no
XLOC_000023	Rdh10	chr1:16105881-16132550	3.99743	4.35112	0.122315	0.58405	0.95167	no
XLOC_000024	D030040B21Rik	chr1:16657551-16662278	5.41641	6.16846	0.187572	0.29985	0.862692	no
XLOC_000025	Tmem70	chr1:16665190-16678275	12.4668	12.9559	0.0555228	0.73345	0.976839	no
XLOC_000026	Ly96	chr1:16688455-16709605	1.93723	2.44668	0.33683	0.5751	0.948179	no
XLOC_000027	Gdap1	chr1:17145372-17164270	2.76425	2.51596	-0.135781	0.51675	0.936133	no
XLOC_000028	Pi15	chr1:17601900-17630939	5.74114	5.3757	-0.0948865	0.4921	0.927519	no
XLOC_000031	Tfap2b	chr1:19208913-19238734	2.40378	2.93039	0.285787	0.1137	0.698967	no
XLOC_000036	Paqr8	chr1:20890621-20938756	13.0573	12.0831	-0.111858	0.3885	0.900554	no
XLOC_000038	Tmem14a	chr1:21218630-21230167	2.74516	3.34827	0.286524	0.4189	0.90999	no
XLOC_000042	Khdc1b	chr1:21383555-21386384	1.61309	1.66582	0.0464086	1	1	no
XLOC_000043	Mir30a	chr1:23272268-23272339	515.479	210.512	-1.29201	1	1	no
XLOC_000044	Mir30c-2	chr1:23291700-23291784	104.254	221.554	1.08755	1	1	no
XLOC_000045	B3gat2	chr1:23761925-23922289	6.05346	5.3912	-0.167153	0.4381	0.915848	no
XLOC_000047	Lmbrd1	chr1:24678543-24766301	4.69746	4.57034	-0.0395802	0.79935	0.98195	no
XLOC_000051	Khdrbs2	chr1:32172805-32657738	1.8765	1.78603	-0.0712846	1	1	no
XLOC_000052	1700001G17Rik	chr1:33669823-33670712	2.67953	2.01153	-0.41369	1	1	no
XLOC_000053	Rab23	chr1:33719895-33742564	16.9242	15.8322	-0.0962304	0.4373	0.91583	no
XLOC_000054	Dst	chr1:34011824-34308652	28.0015	27.3418	-0.0343988	0.76955	0.980084	no
XLOC_000055	Imp4	chr1:34439828-34445747	28.6904	30.0991	0.0691505	0.58985	0.954584	no
XLOC_000060	Arhgef4	chr1:34801721-34812754	4.27384	3.03732	-0.492736	0.02765	0.429677	no
XLOC_000061	Plekhb2	chr1:34849958-34879585	26.4003	26.3547	-0.00249414	0.98375	0.995455	no
XLOC_000062	Hs6st1	chr1:36068399-36106446	11.7554	13.0864	0.15474	0.24585	0.819448	no
XLOC_000063	Arid5a	chr1:36307732-36324029	2.01935	1.91087	-0.0796637	1	1	no
XLOC_000064	Cnnm4	chr1:36471596-36508776	7.33882	8.30685	0.178752	0.21175	0.794549	no
XLOC_000065	Cnnm3	chr1:36511875-36528237	19.5875	20.7419	0.0826179	0.487	0.927087	no
XLOC_000066	Cox5b	chr1:36691486-36693388	31.6135	34.7715	0.137365	0.4881	0.92715	no
XLOC_000069	Cnga3	chr1:37219260-37263384	1.64531	2.15967	0.392453	1	1	no
XLOC_000070	Inpp4a	chr1:37299892-37410735	6.49788	6.48746	-0.00231594	0.9882	0.995455	no
XLOC_000071	Unc50	chr1:37430171-37439124	12.4499	11.8799	-0.067613	0.70635	0.971028	no
XLOC_000072	Lipt1	chr1:37872205-37876298	1.67702	3.07893	0.876527	0.01755	0.354545	no
XLOC_000073	Mrpl30	chr1:37890552-37898333	30.5397	40.4288	0.404696	0.02095	0.379528	no
XLOC_000074	Eif5b	chr1:37998009-38129662	45.3895	49.7233	0.131565	0.33045	0.87327	no
XLOC_000076	Pdcl3	chr1:38987813-38997236	6.9777	6.95504	-0.00469319	0.9812	0.995455	no
XLOC_000078	Rpl31	chr1:39367850-39478747	152.836	187.961	0.298449	0.03175	0.454447	no
XLOC_000079	D1Bwg0212e	chr1:39535801-39546877	13.9505	15.6055	0.161739	0.22645	0.804184	no
XLOC_000080	Map4k4	chr1:39900912-40026310	91.645	87.6075	-0.0650026	0.5751	0.948179	no
XLOC_000084	Il1rl1	chr1:40439648-40465414	1.82662	1.44358	-0.339523	1	1	no
XLOC_000085	Il18r1	chr1:40465551-40500854	4.23704	4.6236	0.12596	0.4591	0.91979	no
XLOC_000090	Pou3f3	chr1:42697145-42700209	107.606	94.3958	-0.188961	0.0877	0.64986	no
XLOC_000092	Mrps9	chr1:42851232-42905683	13.4612	14.7747	0.134327	0.44275	0.916013	no
XLOC_000094	AI597479	chr1:43098709-43115946	10.9993	10.2276	-0.104941	0.4505	0.919081	no
XLOC_000095	Nck2	chr1:43445750-43570518	10.6318	10.5941	-0.00511983	0.9678	0.995455	no
XLOC_000096	1500015O10Rik	chr1:43730601-43742564	1.00071	0.834201	-0.262563	1	1	no
XLOC_000097	Tpp2	chr1:43934006-44002971	27.3602	26.1315	-0.06629	0.56555	0.944817	no
XLOC_000098	Bivm	chr1:44119967-44144771	11.8332	12.4613	0.0746092	0.5744	0.947955	no
XLOC_000099	Ercc5	chr1:44147743-44181260	19.063	18.3152	-0.0577335	0.63705	0.965678	no
XLOC_000100	Gulp1	chr1:44551670-44796836	2.71428	2.30429	-0.236243	0.31705	0.87327	no
XLOC_000101	Col3a1	chr1:45311537-45349706	1.04439	2.01224	0.946134	1	1	no
XLOC_000102	Wdr75	chr1:45795500-45823613	23.924	24.12	0.0117733	0.9275	0.995122	no
XLOC_000104	Tmeff2	chr1:50927522-51187270	2.25958	2.39074	0.0813998	0.72455	0.976036	no
XLOC_000106	Stat4	chr1:52008243-52107184	4.64528	3.39183	-0.453702	0.02545	0.41116	no
XLOC_000107	Stat1	chr1:52119437-52161865	4.32735	3.7834	-0.193803	0.23275	0.810403	no
XLOC_000108	Tmem194b	chr1:52630704-52651919	13.5207	13.2738	-0.0265843	0.8437	0.986897	no
XLOC_000109	Hibch	chr1:52845045-52920860	4.18033	5.50502	0.397131	0.0984	0.669393	no
XLOC_000111	Ormdl1	chr1:53297094-53310245	7.92151	9.03332	0.18948	0.3111	0.870501	no
XLOC_000112	Osgepl1	chr1:53313662-53324064	10.4818	11.7906	0.169751	0.28445	0.854548	no
XLOC_000114	Coq10b	chr1:55052769-55072702	3.57816	3.21713	-0.153446	0.56695	0.945455	no
XLOC_000115	Hspe1	chr1:55088147-55091317	69.2461	79.2137	0.194017	0.1582	0.74815	no
XLOC_000116	Mob4	chr1:55131244-55154899	19.4494	18.6438	-0.0610299	0.6307	0.964132	no
XLOC_000117	Mars2	chr1:55237176-55240058	6.41754	6.4647	0.0105649	0.9554	0.995122	no
XLOC_000118	Plcl1	chr1:55405945-55754285	1.3718	1.42023	0.0500551	1	1	no
XLOC_000120	9130024F11Rik	chr1:56971468-56975196	8.94041	7.04979	-0.34276	0.1788	0.768975	no
XLOC_000121	1700066M21Rik	chr1:57377619-57385422	6.81148	6.9794	0.0351351	0.83425	0.986112	no
XLOC_000122	9430016H08Rik	chr1:57388243-57415958	5.22222	7.46905	0.516261	0.12375	0.7113	no
XLOC_000124	Sgol2	chr1:57985339-58026277	27.6291	28.7751	0.0586334	0.62555	0.964014	no
XLOC_000129	Bzw1	chr1:58393135-58406548	46.0327	45.9465	-0.00270335	0.98025	0.995455	no
XLOC_000130	Nif3l1	chr1:58447632-58462276	14.0264	13.6527	-0.0389555	0.7936	0.98136	no
XLOC_000131	Ndufb3	chr1:58586598-58595948	24.4319	24.6699	0.0139818	0.944	0.995122	no
XLOC_000132	Gm20257	chr1:58652640-58655831	1.51165	2.45983	0.702437	1	1	no
XLOC_000133	Cflar	chr1:58713285-58758882	14.1183	11.1037	-0.346531	0.03475	0.474672	no
XLOC_000134	Casp8	chr1:58795373-58847503	2.95276	2.24373	-0.396166	0.12595	0.713875	no
XLOC_000135	Stradb	chr1:58973570-58995121	7.18715	8.08681	0.170151	0.33825	0.874885	no
XLOC_000137	Fzd7	chr1:59482146-59486955	18.6454	18.9003	0.0195849	0.8713	0.990619	no
XLOC_000139	Nop58	chr1:59685005-59711510	69.3674	79.1336	0.190034	0.09335	0.659396	no
XLOC_000140	Snord70	chr1:59685005-59711510	5186.94	0	#NAME?	0.22225	0.804184	no
XLOC_000141	Snord11	chr1:59685005-59711510	682.679	1547.43	1.1806	0.63955	0.966337	no
XLOC_000142	Bmpr2	chr1:59764636-59870859	85.5599	85.5719	0.000201474	0.999	0.99935	no
XLOC_000143	Fam117b	chr1:59913005-59985346	13.0432	15.687	0.266279	0.0316	0.454447	no
XLOC_000144	Carf	chr1:60076867-60151034	3.36144	3.29878	-0.0271484	0.93795	0.995122	no
XLOC_000145	Nbeal1	chr1:60180598-60334705	8.67262	7.4919	-0.211136	0.07175	0.603854	no
XLOC_000146	Cyp20a1	chr1:60343371-60387387	10.4364	15.0157	0.524848	0.0035	0.170842	no
XLOC_000147	Abi2	chr1:60409618-60481163	42.508	39.7693	-0.0960791	0.38615	0.89994	no
XLOC_000151	9530026F06Rik	chr1:61378431-61395904	2.75382	2.41642	-0.188567	1	1	no
XLOC_000152	Pard3b	chr1:61638823-62642284	8.62755	8.39927	-0.0386875	0.75045	0.976839	no
XLOC_000153	Nrp2	chr1:62703316-62818692	3.23469	3.29952	0.028633	0.8698	0.990472	no
XLOC_000154	Gm11602	chr1:63114470-63176822	9.72752	9.0601	-0.102546	0.72195	0.975826	no
XLOC_000155	Eef1b2	chr1:63176830-63180486	42.6396	48.3886	0.182474	0.13835	0.72348	no
XLOC_000156	Snora41	chr1:63176830-63180486	22.7894	108.507	2.25135	0.42945	0.913019	no
XLOC_000157	Zdbf2	chr1:63273268-63314575	27.0406	29.9828	0.149009	0.18475	0.771413	no
XLOC_000158	Adam23	chr1:63445903-63596515	13.1937	12.4147	-0.0877949	0.5602	0.944197	no
XLOC_000159	Fastkd2	chr1:63730624-63753385	6.15922	6.00464	-0.0366712	0.82545	0.985547	no
XLOC_000161	Creb1	chr1:64532803-64604548	26.0612	24.3352	-0.098858	0.37555	0.894759	no
XLOC_000162	Ccnyl1	chr1:64691344-64725642	13.4247	13.7183	0.0312086	0.8246	0.985547	no
XLOC_000163	Pikfyve	chr1:65186684-65278696	12.4213	12.1845	-0.0277611	0.8106	0.984349	no
XLOC_000166	Mtap2	chr1:66175328-66442583	28.5376	29.6788	0.0565689	0.61615	0.963477	no
XLOC_000168	Rpe	chr1:66700892-66817595	18.0908	16.5453	-0.128833	0.528	0.939662	no
XLOC_000172	Atic	chr1:71557155-71579403	21.6045	25.4839	0.238253	0.066	0.585278	no
XLOC_000173	Apol7d	chr1:71653334-71662843	2.66559	2.69321	0.0148749	0.95555	0.995122	no
XLOC_000176	Xrcc5	chr1:72307420-72394953	23.1205	23.8996	0.0478117	0.71525	0.974233	no
XLOC_000177	Smarcal1	chr1:72583250-72636790	8.85345	8.66789	-0.0305586	0.81355	0.984349	no
XLOC_000178	Rpl37a	chr1:72711259-72713813	84.9326	97.6554	0.201382	0.15325	0.74214	no
XLOC_000179	Igfbp2	chr1:72824479-72852471	21.3214	25.6056	0.264154	0.0955	0.664717	no
XLOC_000183	Cxcr2	chr1:74153993-74161246	26.4776	23.052	-0.199884	0.1102	0.689259	no
XLOC_000184	Arpc2	chr1:74236549-74268213	50.5796	51.3647	0.0222219	0.8639	0.98912	no
XLOC_000186	Pnkd	chr1:74285033-74353692	27.9938	24.6845	-0.181503	0.3622	0.88774	no
XLOC_000188	Slc11a1	chr1:74375202-74386051	3.153	2.82165	-0.16019	0.5328	0.939662	no
XLOC_000189	Ctdsp1	chr1:74391608-74397285	26.114	28.6343	0.132917	0.2867	0.856204	no
XLOC_000190	Mir26b	chr1:74391608-74397285	95.0327	0	#NAME?	1	1	no
XLOC_000191	Vil1	chr1:74409383-74588028	1.60057	1.4075	-0.185447	1	1	no
XLOC_000192	Rqcd1	chr1:74409383-74588028	26.0745	27.3289	0.0677852	0.797	0.981734	no
XLOC_000193	Plcd4	chr1:74409383-74588028	2.32849	2.13207	-0.127144	0.90035	0.993721	no
XLOC_000194	Bcs1l	chr1:74588360-74592443	6.96064	8.03712	0.20746	0.28395	0.854548	no
XLOC_000195	Stk36	chr1:74601454-74636893	7.15134	6.18629	-0.20914	0.1388	0.724246	no
XLOC_000196	Ttll4	chr1:74661753-74697973	45.7003	45.7087	0.000264545	0.9979	0.998512	no
XLOC_000201	Fam134a	chr1:75142785-75147909	7.33337	10.582	0.529062	0.00215	0.129249	no
XLOC_000202	Zfand2b	chr1:75168645-75171626	2.49672	2.04071	-0.290967	0.45725	0.91979	no
XLOC_000203	Ankzf1	chr1:75192134-75210778	4.96959	3.71242	-0.420768	0.13425	0.718955	no
XLOC_000204	Stk16	chr1:75210828-75219253	9.89747	9.3975	-0.0747824	0.66315	0.96726	no
XLOC_000205	Dnajb2	chr1:75236422-75245692	7.69462	8.48298	0.140721	0.45285	0.91979	no
XLOC_000207	Speg	chr1:75375296-75432306	2.22619	2.82449	0.343415	0.3334	0.87327	no
XLOC_000208	Gmppa	chr1:75435942-75443176	19.544	18.1808	-0.104306	0.51325	0.93418	no
XLOC_000210	Tmem198	chr1:75479531-75485693	1.01165	1.15441	0.190449	1	1	no
XLOC_000211	Inha	chr1:75507076-75510354	6.12394	4.84199	-0.338859	0.17935	0.768975	no
XLOC_000212	Stk11ip	chr1:75521528-75537335	9.75137	7.9745	-0.29021	0.0389	0.49542	no
XLOC_000213	Slc4a3	chr1:75546265-75559431	6.26126	5.1452	-0.283228	0.08065	0.633466	no
XLOC_000215	Sgpp2	chr1:78310345-78420286	8.02507	7.37812	-0.121261	0.4102	0.908407	no
XLOC_000217	Acsl3,Utp14b	chr1:78657824-78707743	75.503	75.0849	-0.00801169	0.9437	0.995122	no
XLOC_000219	Mrpl44	chr1:79776017-79781445	6.01382	7.66597	0.350186	0.131	0.715924	no
XLOC_000222	Rhbdd1	chr1:82316578-82445367	3.92628	4.33644	0.143347	0.4396	0.916013	no
XLOC_000224	Mff	chr1:82724917-82752389	25.689	26.4307	0.0410615	0.75605	0.977517	no
XLOC_000225	Agfg1	chr1:82839482-82896275	20.7757	20.0696	-0.0498885	0.6974	0.968438	no
XLOC_000229	Fbxo36	chr1:84839840-84900486	3.02642	2.83015	-0.0967366	0.819	0.985547	no
XLOC_000230	Gm7609	chr1:85199610-85213762	7.84047	6.57858	-0.253163	0.2326	0.810403	no
XLOC_000231	Sp140	chr1:85576898-85645036	7.25782	6.61882	-0.132963	0.471	0.923675	no
XLOC_000233	Cab39	chr1:85793446-85851577	15.7054	15.5707	-0.0124185	0.9231	0.995122	no
XLOC_000234	Itm2c	chr1:85894509-85908698	8.30321	10.5349	0.343439	0.0563	0.555798	no
XLOC_000235	4933407L21Rik	chr1:85928482-85931756	0.701732	1.11694	0.670558	1	1	no
XLOC_000237	2810459M11Rik	chr1:86045862-86055456	2.20149	2.47191	0.167142	0.48625	0.927087	no
XLOC_000238	Psmd1	chr1:86064618-86139295	49.2625	48.7949	-0.0137601	0.90555	0.993721	no
XLOC_000239	Armc9	chr1:86154779-86278284	6.57046	5.94984	-0.143145	0.4756	0.923995	no
XLOC_000241	C130036L24Rik	chr1:86359573-86367964	11.4375	10.9449	-0.0635141	0.7466	0.976839	no
XLOC_000243	Ptma	chr1:86526735-86530698	431.226	459.706	0.0922674	0.41245	0.909623	no
XLOC_000244	Cops7b	chr1:86587099-86606500	15.725	16.8048	0.0958154	0.5045	0.93231	no
XLOC_000245	Dis3l2	chr1:86703803-87050097	10.3306	11.0943	0.102891	0.472	0.923675	no
XLOC_000250	Eif4e2	chr1:87213913-87240488	24.9717	26.025	0.0596026	0.66505	0.96726	no
XLOC_000251	Efhd1	chr1:87264363-87310791	2.78575	3.58973	0.365806	0.1955	0.779098	no
XLOC_000252	Gigyf2	chr1:87326997-87450810	37.8301	38.4138	0.0220927	0.85245	0.987741	no
XLOC_000256	Atg16l1	chr1:87756010-87792428	10.8464	9.01318	-0.267113	0.0782	0.62549	no
XLOC_000257	Scarna6	chr1:87756010-87792428	17.2569	6.30286	-1.45309	0.2852	0.854629	no
XLOC_000259	Dgkd	chr1:87853286-87944489	22.415	23.706	0.0807869	0.48255	0.926889	no
XLOC_000264	Gm19589	chr1:88551516-88562166	1.16133	1.26539	0.123812	1	1	no
XLOC_000265	2410088K16Rik	chr1:88754889-88755733	1.33266	1.87538	0.492879	1	1	no
XLOC_000267	Sh3bp4	chr1:89070461-89153793	4.91523	4.7375	-0.0531321	0.7651	0.97912	no
XLOC_000268	Agap1	chr1:89454810-89895282	19.6855	20.4747	0.0567151	0.6496	0.967141	no
XLOC_000269	Cxcr7	chr1:90204002-90216288	1.2261	2.10725	0.781278	1	1	no
XLOC_000270	Cops8	chr1:90603424-90613341	21.154	23.7265	0.165568	0.2327	0.810403	no
XLOC_000273	Lrrfip1	chr1:90998726-91128944	9.81246	10.7149	0.126926	0.40625	0.907309	no
XLOC_000276	Ube2f	chr1:91250318-91286025	13.8881	12.3939	-0.164221	0.3625	0.88774	no
XLOC_000277	Scly	chr1:91298337-91321080	7.24394	6.33815	-0.192712	0.30625	0.867315	no
XLOC_000280	Fam132b	chr1:91366429-91374217	2.48535	2.28957	-0.118371	0.64305	0.96688	no
XLOC_000281	Traf3ip1	chr1:91494667-91529307	14.3779	14.8227	0.0439612	0.73705	0.976839	no
XLOC_000282	Asb1	chr1:91540564-91559590	2.11045	1.87153	-0.173334	1	1	no
XLOC_000289	Gpc1	chr1:92831685-92860196	55.7271	58.6064	0.0726794	0.5187	0.936875	no
XLOC_000290	Mir149	chr1:92831685-92860196	1812.29	706.952	-1.35813	0.64615	0.966908	no
XLOC_000291	Dusp28	chr1:92906988-92908620	2.5483	2.57011	0.0122939	1	1	no
XLOC_000292	Rnpepl1	chr1:92910824-92920585	13.8561	14.8862	0.103453	0.4603	0.91979	no
XLOC_000293	Capn10	chr1:92933542-92950590	5.58216	5.03319	-0.14935	0.44305	0.916013	no
XLOC_000294	Gpr35	chr1:92973118-92986391	1.03576	0.701654	-0.561857	1	1	no
XLOC_000298	Ppp1r7	chr1:93343644-93367618	14.1789	16.7825	0.243208	0.0609	0.565533	no
XLOC_000300	2017-09-02	chr1:93478992-93509732	34.5507	34.8769	0.0135576	0.90875	0.994038	no
XLOC_000301	Farp2	chr1:93512103-93635727	2.56673	2.73991	0.0941929	0.8066	0.984069	no
XLOC_000302	Bok	chr1:93685693-93695762	11.0218	14.5557	0.401217	0.0278	0.429677	no
XLOC_000303	Atg4b	chr1:93755032-93789529	9.11821	9.96304	0.127837	0.40075	0.905155	no
XLOC_000304	Ing5	chr1:93803964-93822100	10.0086	10.8449	0.115783	0.38085	0.898715	no
XLOC_000305	D2hgdh	chr1:93825239-93852174	12.8408	13.5081	0.0730923	0.5969	0.95871	no
XLOC_000311	Fam174a	chr1:95313627-95335284	1.46778	1.24662	-0.235612	1	1	no
XLOC_000312	Gin1	chr1:97770178-97792971	9.73194	9.11307	-0.0947908	0.57515	0.948179	no
XLOC_000317	Cdh20	chr1:104768818-104995481	2.01595	2.13523	0.0829298	1	1	no
XLOC_000318	2310035C23Rik	chr1:105663860-105755131	13.0108	12.3178	-0.0789693	0.5178	0.936401	no
XLOC_000319	Tnfrsf11a	chr1:105780722-105847981	1.04442	0.967042	-0.111058	1	1	no
XLOC_000320	Zcchc2	chr1:105990405-106034079	15.3242	17.3596	0.179915	0.1315	0.716775	no
XLOC_000321	Phlpp1	chr1:106171868-106394245	25.6391	25.0524	-0.0333939	0.76205	0.978488	no
XLOC_000332	Mki67ip	chr1:118321842-118333831	9.78878	13.9248	0.508461	0.00215	0.129249	no
XLOC_000333	Clasp1	chr1:118389057-118609462	52.9894	53.2612	0.00738014	0.9489	0.995122	no
XLOC_000335	Tmem185b	chr1:119526153-119528983	5.82729	6.09117	0.0638953	0.7293	0.9766	no
XLOC_000337	3110009E18Rik	chr1:120121186-120188189	1.02683	1.6607	0.693594	1	1	no
XLOC_000341	Ccdc93	chr1:121431066-121506460	8.31849	7.83508	-0.0863735	0.49385	0.92765	no
XLOC_000342	Slc35f5	chr1:125561015-125595684	3.37101	4.17276	0.307819	0.1643	0.755111	no
XLOC_000344	Mgat5	chr1:127204985-127482972	10.0552	10.1221	0.00957062	0.95	0.995122	no
XLOC_000345	Acmsd	chr1:127729412-127774054	10.4441	8.00921	-0.382957	0.02225	0.38623	no
XLOC_000346	Ccnt2	chr1:127774163-127804837	45.9055	46.9054	0.0310878	0.7858	0.98136	no
XLOC_000347	Rab3gap1	chr1:127868772-127943876	7.63684	6.51186	-0.229906	0.1228	0.7113	no
XLOC_000348	R3hdm1	chr1:128103305-128237735	61.5587	66.0772	0.102188	0.35755	0.88774	no
XLOC_000349	Mir128-1	chr1:128103305-128237735	575.153	765.005	0.411522	0.73615	0.976839	no
XLOC_000350	Ubxn4	chr1:128244180-128279377	36.8362	35.7978	-0.0412545	0.7199	0.975133	no
XLOC_000351	Thsd7b	chr1:129273303-130219278	2.086	1.50825	-0.467862	1	1	no
XLOC_000352	Yod1	chr1:130689042-130729253	6.71253	6.6874	-0.00541122	0.9821	0.995455	no
XLOC_000358	Eif2d	chr1:131153206-131173471	17.0008	17.4083	0.0341733	0.81505	0.984349	no
XLOC_000359	Fam72a	chr1:131527988-131539872	3.8934	4.26703	0.132202	0.57185	0.946373	no
XLOC_000365	Slc41a1	chr1:131828011-131848864	17.192	17.2435	0.00431728	0.97105	0.995455	no
XLOC_000366	Rab7l1	chr1:131867276-131872889	2.28143	1.09394	-1.0604	1	1	no
XLOC_000367	Nucks1	chr1:131910457-131936321	66.0364	73.3228	0.151	0.18485	0.771413	no
XLOC_000369	Elk4	chr1:132007604-132025684	32.4248	31.182	-0.0563867	0.6302	0.964132	no
XLOC_000371	Mir135b	chr1:132191435-132257382	89.9667	38.7363	-1.2157	0.54065	0.940303	no
XLOC_000373	Nuak2	chr1:132316124-132333488	11.2519	9.98136	-0.172861	0.23485	0.812646	no
XLOC_000374	Dstyk	chr1:132417452-132466959	14.4777	12.6286	-0.197139	0.10285	0.672036	no
XLOC_000375	Rbbp5	chr1:132477366-132505665	29.5138	27.788	-0.0869291	0.4593	0.91979	no
XLOC_000376	Tmem81	chr1:132506229-132508639	1.38929	1.09718	-0.340548	1	1	no
XLOC_000377	Gm10538	chr1:132564689-132741797	6.1924	4.86487	-0.348096	0.40355	0.906705	no
XLOC_000378	Lrrn2	chr1:132880354-132940005	2.01616	1.64046	-0.297508	1	1	no
XLOC_000379	Pik3c2b	chr1:133046011-133108688	52.8105	49.3997	-0.0963217	0.39095	0.901186	no
XLOC_000380	Ppp1r15b	chr1:133131165-133139800	24.1915	24.1588	-0.00195112	0.986	0.995455	no
XLOC_000381	Plekha6	chr1:133246096-133303435	12.0884	10.932	-0.145058	0.2486	0.821545	no
XLOC_000392	Cyb5r1	chr1:134405989-134411738	6.30556	7.25189	0.201732	0.34745	0.882101	no
XLOC_000393	Adipor1	chr1:134415466-134432341	29.867	30.3488	0.0230862	0.85785	0.988146	no
XLOC_000394	Klhl12	chr1:134455554-134490873	8.57088	8.96255	0.0644659	0.6737	0.96726	no
XLOC_000395	Rabif	chr1:134494659-134507884	8.66067	9.08614	0.0691885	0.6975	0.968438	no
XLOC_000396	Kdm5b	chr1:134560177-134632878	27.7648	28.6843	0.0470016	0.67295	0.96726	no
XLOC_000397	Syt2	chr1:134646680-134749417	1.26177	1.4638	0.214267	1	1	no
XLOC_000398	Ube2t	chr1:134962576-134974137	11.0734	12.544	0.179899	0.3879	0.900527	no
XLOC_000399	Ptpn7	chr1:135132724-135145320	1.94841	1.5576	-0.32298	1	1	no
XLOC_000400	Arl8a	chr1:135146833-135156268	21.6586	17.6408	-0.296027	0.04685	0.529822	no
XLOC_000401	Lmod1	chr1:135324812-135368065	1.13435	0.930593	-0.285648	1	1	no
XLOC_000402	Csrp1	chr1:135729196-135752229	14.624	17.6573	0.27193	0.08525	0.648132	no
XLOC_000403	Phlda3	chr1:135766084-135769134	1.06393	1.87887	0.820459	1	1	no
XLOC_000407	Tmem9	chr1:136008218-136035030	21.4998	25.6794	0.256284	0.08465	0.646737	no
XLOC_000409	Kif21b	chr1:136131400-136178014	20.3667	24.202	0.248913	0.02865	0.433613	no
XLOC_000410	Ddx59	chr1:136411915-136440220	3.75481	3.51413	-0.0955716	0.68475	0.96726	no
XLOC_000411	Kif14	chr1:136467957-136531511	16.9487	19.993	0.238325	0.03895	0.49542	no
XLOC_000412	Zfp281	chr1:136624900-136630391	15.2237	15.3117	0.00832089	0.94545	0.995122	no
XLOC_000413	Gm19705	chr1:136683395-136690805	1.80398	1.623	-0.152523	1	1	no
XLOC_000416	Mir181b-1	chr1:137966638-137966718	0	124.132	inf	1	1	no
XLOC_000418	Dennd1b	chr1:138963708-139176042	7.50373	6.6674	-0.170484	0.1771	0.767949	no
XLOC_000420	Zbtb41	chr1:139422382-139453007	14.6666	14.4969	-0.0167919	0.88195	0.992183	no
XLOC_000421	Aspm	chr1:139454772-139494088	64.8742	72.2408	0.155168	0.20585	0.790178	no
XLOC_000423	Kcnt2	chr1:140246256-140656402	3.75061	3.42833	-0.129619	0.48625	0.927087	no
XLOC_000424	B3galt2	chr1:143607498-143702684	15.4718	13.6543	-0.180291	0.3728	0.892605	no
XLOC_000425	Glrx2	chr1:143739348-143749678	36.185	35.3836	-0.0323078	0.78285	0.9813	no
XLOC_000426	Uchl5	chr1:143777277-143807466	10.6058	10.9686	0.0485313	0.77465	0.980857	no
XLOC_000430	Tpr	chr1:150361310-150466165	92.1781	98.8551	0.100892	0.4179	0.90999	no
XLOC_000432	Ivns1abp	chr1:151344497-151364445	173.733	154.757	-0.166867	0.15655	0.745834	no
XLOC_000433	1190005F20Rik	chr1:151428647-151458183	20.7621	20.0039	-0.0536762	0.6806	0.96726	no
XLOC_000434	Fam129a	chr1:151571372-151719347	0.827321	1.29484	0.646259	1	1	no
XLOC_000435	Edem3	chr1:151755373-151822328	11.1518	11.4123	0.033316	0.78415	0.98136	no
XLOC_000438	Arpc5	chr1:152766541-152775580	23.5788	24.181	0.0363859	0.7886	0.98136	no
XLOC_000439	Ncf2	chr1:152807889-152836990	8.08461	5.96527	-0.43859	0.0137	0.323978	no
XLOC_000441	1700012A16Rik	chr1:153425208-153452574	2.53628	3.73607	0.558812	0.04185	0.507982	no
XLOC_000442	Rgs8	chr1:153653036-153697665	3.57215	4.27802	0.26015	0.1069	0.679851	no
XLOC_000443	Rgs16	chr1:153740352-153745468	3.80039	3.44264	-0.142632	0.536	0.939662	no
XLOC_000444	Rnasel	chr1:153749425-153764221	9.5658	7.62208	-0.327699	0.0183	0.363518	no
XLOC_000445	Gm5531	chr1:153874344-153876871	7.03525	7.61742	0.1147	0.50785	0.934176	no
XLOC_000447	Glul	chr1:153899944-153909714	28.951	28.9685	0.000873017	0.99615	0.99751	no
XLOC_000449	Stx6	chr1:155158702-155203517	19.0061	17.5341	-0.116297	0.3833	0.898715	no
XLOC_000450	Acbd6	chr1:155558119-155687233	18.6981	22.0816	0.239958	0.15435	0.742863	no
XLOC_000451	Tor1aip2	chr1:156004598-156068859	45.2798	45.556	0.00877075	0.95205	0.995122	no
XLOC_000453	Abl2	chr1:156558786-156649619	13.1322	12.6034	-0.0592976	0.60545	0.959676	no
XLOC_000454	Angptl1	chr1:156804165-156939626	8.82459	7.68153	-0.200136	0.5652	0.944817	no
XLOC_000455	2810025M15Rik	chr1:157135182-157420236	16.0563	17.5869	0.131364	0.80235	0.982409	no
XLOC_000456	BC026585	chr1:157458581-157488733	2.55171	2.49062	-0.0349645	1	1	no
XLOC_000458	Astn1	chr1:158362303-158691786	31.3565	29.595	-0.0834086	0.45605	0.91979	no
XLOC_000459	Mir488	chr1:158362303-158691786	58.5381	99.2196	0.76125	0.7657	0.97912	no
XLOC_000460	Rfwd2	chr1:159232325-159347580	35.0616	33.2492	-0.0765711	0.50425	0.93231	no
XLOC_000461	Scarna3a	chr1:159232325-159347580	293.71	445.117	0.599792	0.68305	0.96726	no
XLOC_000464	Mrps14	chr1:160195259-160201186	12.6652	11.4334	-0.147613	0.36965	0.891123	no
XLOC_000465	Rc3h1	chr1:160906410-160974976	26.8741	25.5842	-0.07096	0.52445	0.938472	no
XLOC_000466	Serpinc1	chr1:160978605-161003014	2.94674	3.31773	0.171075	0.50585	0.932809	no
XLOC_000467	Gas5,Mir5117	chr1:161035165-161038537	224.86	268.065	0.253555	0.31075	0.870161	no
XLOC_000468	Snord47	chr1:161035165-161038537	2383.73	1341.17	-0.829734	0.7671	0.979804	no
XLOC_000469	Cenpl	chr1:161070891-161086343	14.8779	15.1501	0.0261636	0.8476	0.987483	no
XLOC_000470	Ankrd45	chr1:161142711-161170507	3.0992	3.28635	0.084592	0.69885	0.968438	no
XLOC_000473	Pigc	chr1:161942088-161979636	5.01923	3.70681	-0.437288	0.02165	0.38044	no
XLOC_000476	Vamp4	chr1:162570827-162599078	9.62978	8.68875	-0.148354	0.3609	0.88774	no
XLOC_000478	Kifap3	chr1:163779678-163917100	14.6261	13.7014	-0.0942183	0.4642	0.92118	no
XLOC_000479	Scyl3	chr1:163930063-163994781	11.4513	13.1887	0.203794	0.2474	0.820904	no
XLOC_000480	2810422O20Rik	chr1:163994944-163997244	2.09156	1.53897	-0.442621	1	1	no
XLOC_000485	Slc19a2	chr1:164249054-164265368	3.38229	2.91516	-0.214428	0.31075	0.870161	no
XLOC_000486	4930455F23Rik	chr1:164275597-164287847	6.3534	6.9835	0.136421	0.4874	0.927087	no
XLOC_000487	Nme7	chr1:164307674-164458355	15.1843	13.0646	-0.21692	0.2439	0.81794	no
XLOC_000490	Gpr161	chr1:165295765-165321851	7.58787	5.66496	-0.421628	0.03995	0.500888	no
XLOC_000491	Brp44	chr1:165461207-165481214	6.12815	8.99417	0.553539	0.0586	0.558849	no
XLOC_000493	Creg1	chr1:165763779-165775304	3.70719	3.24736	-0.191057	0.43205	0.913358	no
XLOC_000494	Cd247	chr1:165788680-166002634	1.65183	0.971497	-0.765784	1	1	no
XLOC_000496	Ildr2	chr1:166254138-166316832	15.4516	14.8648	-0.0558617	0.62835	0.964132	no
XLOC_000497	Tada1	chr1:166379166-166409828	19.336	18.4034	-0.0713155	0.81065	0.984349	no
XLOC_000498	Fam78b	chr1:167001416-167091302	2.21519	3.05492	0.463705	0.01575	0.337517	no
XLOC_000499	Tmco1	chr1:167308669-167333978	4.62561	5.24837	0.182225	0.2619	0.833033	no
XLOC_000500	Aldh9a1	chr1:167349990-167368530	8.26563	8.56212	0.0508434	0.7517	0.976839	no
XLOC_000502	Lmx1a	chr1:167689557-167848733	0.743043	1.03343	0.475921	1	1	no
XLOC_000504	1700084C01Rik	chr1:169928938-169934653	1.24461	1.19047	-0.064162	1	1	no
XLOC_000508	1700015E13Rik	chr1:170308860-170312125	5.29445	4.5682	-0.212855	0.568	0.945455	no
XLOC_000515	Adamts4	chr1:171250421-171259922	0.758992	1.15782	0.609253	1	1	no
XLOC_000516	B4galt3	chr1:171270327-171276895	8.06994	8.26881	0.0351221	0.8501	0.987741	no
XLOC_000517	Dedd	chr1:171329144-171345645	11.4287	11.0685	-0.046199	0.7796	0.980857	no
XLOC_000518	Pfdn2	chr1:171345698-171358170	34.6171	42.7607	0.304803	0.0885	0.64986	no
XLOC_000521	Usf1	chr1:171411680-171418742	8.07542	7.05666	-0.194552	0.3247	0.87327	no
XLOC_000522	Tstd1	chr1:171419032-171420352	12.3779	10.225	-0.275675	0.3708	0.891945	no
XLOC_000524	Alyref2	chr1:171503477-171504750	2.50202	3.20481	0.357141	0.31545	0.87327	no
XLOC_000528	Cd84	chr1:171839696-171890718	14.2333	13.5533	-0.0706304	0.5957	0.958537	no
XLOC_000530	Copa	chr1:172066012-172122332	57.4429	63.7387	0.15004	0.2724	0.845787	no
XLOC_000531	Pex19	chr1:172126754-172136497	18.0538	17.0312	-0.0841176	0.53295	0.939662	no
XLOC_000532	Dcaf8	chr1:172148014-172196393	35.244	33.2357	-0.0846429	0.46815	0.922319	no
XLOC_000533	Igsf8	chr1:172312406-172319835	73.8807	87.7973	0.248978	0.03055	0.448512	no
XLOC_000534	Kcnj10	chr1:172341209-172374085	10.1607	9.026	-0.170846	0.1911	0.77668	no
XLOC_000535	Pigm	chr1:172376530-172384099	16.3012	17.0364	0.0636392	0.58445	0.952023	no
XLOC_000537	Igsf9	chr1:172482212-172498877	44.7921	52.3174	0.224044	0.04945	0.53598	no
XLOC_000538	Tagln2	chr1:172500245-172507375	15.4444	18.1715	0.234588	0.1625	0.752824	no
XLOC_000541	Crp	chr1:172698055-172699966	2.7932	3.50902	0.329148	0.2467	0.820322	no
XLOC_000546	Aim2	chr1:173420603-173466036	20.3919	15.9136	-0.357738	0.00895	0.268312	no
XLOC_000548	Pydc3	chr1:173673679-173698392	2.19147	1.91422	-0.195138	1	1	no
XLOC_000563	Fmn2	chr1:174501824-174822729	14.5567	14.7008	0.0142099	0.90775	0.994038	no
XLOC_000566	Exo1	chr1:175880777-175911396	17.0334	16.0543	-0.0854084	0.4829	0.926889	no
XLOC_000567	Sdccag8	chr1:176814811-177020432	18.1727	14.6964	-0.306317	0.03225	0.45632	no
XLOC_000568	Zfp238	chr1:177444660-177450764	44.7669	44.2716	-0.0160508	0.8892	0.992905	no
XLOC_000571	Pppde1	chr1:178187416-178252597	7.7355	8.51477	0.138472	0.32915	0.87327	no
XLOC_000572	Fam36a	chr1:178319152-178322693	85.0172	73.7247	-0.205608	0.21945	0.804008	no
XLOC_000573	Efcab2	chr1:178405880-178483249	1.87216	1.61124	-0.216534	1	1	no
XLOC_000574	Kif26b	chr1:178529124-178932857	4.6302	4.33686	-0.0944253	0.52135	0.938472	no
XLOC_000575	Cnst	chr1:179546528-179627473	12.4579	11.4932	-0.116277	0.36595	0.889526	no
XLOC_000576	Sccpdh	chr1:179668230-179687184	9.83842	9.07091	-0.117178	0.5079	0.934176	no
XLOC_000577	Cdc42bpa	chr1:179961088-180196020	18.6744	17.3299	-0.107804	0.34375	0.879451	no
XLOC_000578	Itpkb	chr1:180326968-180423659	2.98238	3.11355	0.0620947	0.75445	0.97728	no
XLOC_000579	Parp1	chr1:180568974-180601254	78.8635	88.7904	0.171046	0.12725	0.714858	no
XLOC_000580	Lin9	chr1:180641333-180690687	26.1454	25.4693	-0.0377955	0.7912	0.98136	no
XLOC_000581	Acbd3	chr1:180726042-180754204	16.4859	17.089	0.0518332	0.68735	0.96726	no
XLOC_000582	BC031781	chr1:180851150-180868114	9.91164	10.1536	0.0347953	0.81015	0.984349	no
XLOC_000584	Pycr2	chr1:180904273-180908088	7.33645	8.07144	0.137745	0.5017	0.931004	no
XLOC_000586	Tmem63a	chr1:180942517-180975104	1.44699	0.783078	-0.885824	1	1	no
XLOC_000588	Cnih4	chr1:181150930-181168994	15.275	15.108	-0.0158625	0.90305	0.993721	no
XLOC_000589	Cnih3	chr1:181352627-181460641	2.05023	2.28872	0.158755	0.5506	0.942298	no
XLOC_000590	Srp9	chr1:182124736-182132415	14.5115	19.4385	0.421714	0.01285	0.317004	no
XLOC_000592	Trp53bp2	chr1:182409166-182462436	44.6723	45.0948	0.0135782	0.9057	0.993721	no
XLOC_000594	Susd4	chr1:182764905-182895654	2.537	2.50142	-0.0203719	0.9643	0.995455	no
XLOC_000596	Aida	chr1:183297059-183324501	15.7567	16.1093	0.0319269	0.80225	0.982409	no
XLOC_000597	Taf1a	chr1:183388884-183410206	20.0899	19.142	-0.0697244	0.6044	0.959318	no
XLOC_000599	Dusp10	chr1:184034460-184075636	31.826	36.1466	0.183654	0.12965	0.715924	no
XLOC_000601	Rab3gap2	chr1:185204167-185329401	10.6373	9.72398	-0.129512	0.4359	0.915566	no
XLOC_000604	Mir215	chr1:185204167-185329401	103.977	91.2948	-0.187654	0.8803	0.992074	no
XLOC_000605	Bpnt1	chr1:185332158-185357769	6.81943	8.13251	0.25405	0.15855	0.748257	no
XLOC_000606	Eprs	chr1:185363094-185428355	44.0592	48.8847	0.149937	0.18485	0.771413	no
XLOC_000607	Slc30a10	chr1:185447115-185468761	28.7785	29.5018	0.0358107	0.7567	0.977517	no
XLOC_000611	1700007P06Rik	chr1:187048406-187215446	3.84054	4.45124	0.212897	0.59785	0.958916	no
XLOC_000612	Gpatch2	chr1:187215510-187351429	12.2541	12.151	-0.0121894	0.92435	0.995122	no
XLOC_000617	Angel2	chr1:190925107-190946491	32.7046	29.8619	-0.131186	0.27865	0.848978	no
XLOC_000618	A230020J21Rik	chr1:191005831-191029781	2.0863	1.28951	-0.694119	1	1	no
XLOC_000619	1700022P22Rik	chr1:191036821-191042941	1.02773	2.51329	1.29011	1	1	no
XLOC_000620	Nsl1	chr1:191063020-191084558	25.9153	25.7774	-0.00769717	0.95095	0.995122	no
XLOC_000622	Tmem206	chr1:191325964-191397041	14.4465	14.5936	0.0146184	0.92065	0.995122	no
XLOC_000623	Ints7	chr1:191575733-191621691	31.7731	34.1642	0.104682	0.38145	0.898715	no
XLOC_000624	Lpgat1	chr1:191718023-191784257	14.6003	14.83	0.0225173	0.84725	0.987378	no
XLOC_000625	Nek2	chr1:191821472-191833049	17.7032	17.7111	0.000646639	0.99345	0.996154	no
XLOC_000626	Slc30a1	chr1:191894071-191913247	7.5195	8.35345	0.151736	0.3342	0.873585	no
XLOC_000628	Gm10516	chr1:192100461-192151025	2.78543	2.06389	-0.432534	0.21	0.793048	no
XLOC_000630	1700065J18Rik	chr1:192841704-192842739	0.373167	1.79762	2.2682	1	1	no
XLOC_000631	Irf6	chr1:193153111-193172035	2.55042	2.30503	-0.145948	0.49375	0.92765	no
XLOC_000632	A130010J15Rik	chr1:193173468-193201546	3.17684	3.24121	0.0289439	0.88145	0.992183	no
XLOC_000634	Plxna2	chr1:194619828-194816868	43.4404	46.9883	0.113263	0.3219	0.87327	no
XLOC_000636	A330023F24Rik,Mir29b-2,Mir29c	chr1:195017398-195037908	262.456	55.3883	-2.24442	0.40735	0.907309	no
XLOC_000640	Mrpl15	chr1:4773199-4785726	8.12144	8.10484	-0.00295164	0.9885	0.995455	no
XLOC_000641	Rgs20	chr1:4909575-5070285	36.627	32.2988	-0.181429	0.1667	0.757981	no
XLOC_000644	2610203C22Rik	chr1:9548045-9631092	1.6006	2.2186	0.471043	1	1	no
XLOC_000645	Mybl1	chr1:9668834-9700209	21.505	19.1893	-0.164371	0.17915	0.768975	no
XLOC_000646	Vcpip1	chr1:9723195-9771256	20.5357	18.0073	-0.189556	0.1141	0.69992	no
XLOC_000647	Snhg6	chr1:9942024-9944118	26.4418	28.8223	0.124365	0.62775	0.964014	no
XLOC_000648	Snord87	chr1:9942024-9944118	187.73	778.004	2.05112	0.32295	0.87327	no
XLOC_000650	Cops5	chr1:10024830-10037898	28.8287	31.7696	0.140139	0.33115	0.87327	no
XLOC_000651	Arfgef1	chr1:10137506-10232670	20.3055	19.4563	-0.0616283	0.59705	0.95871	no
XLOC_000654	Slco5a1	chr1:12866549-12991135	8.38578	8.94214	0.0926752	0.44855	0.918477	no
XLOC_000656	Ncoa2	chr1:13139158-13374083	29.6547	30.1014	0.0215682	0.8466	0.987325	no
XLOC_000657	Tram1	chr1:13564701-13589864	12.7484	13.2584	0.0565833	0.68865	0.96726	no
XLOC_000658	Lactb2	chr1:13625899-13660509	8.19595	6.89117	-0.250162	0.18955	0.77668	no
XLOC_000659	Gm5523	chr1:13785684-13786929	3.9203	3.34326	-0.229709	0.4607	0.91979	no
XLOC_000660	Eya1	chr1:14168957-14310199	13.5517	14.1595	0.0632958	0.61985	0.963979	no
XLOC_000663	Gm106	chr1:15853861-15892722	3.65828	2.83193	-0.369379	0.10435	0.673002	no
XLOC_000665	Rpl7	chr1:16101295-16104433	63.0296	78.5969	0.318444	0.0156	0.337078	no
XLOC_000666	Stau2	chr1:16228809-16519302	22.2484	21.0783	-0.0779441	0.54515	0.941301	no
XLOC_000667	Ube2w	chr1:16569405-16619286	10.8273	8.63276	-0.326782	0.0451	0.525229	no
XLOC_000668	Tceb1	chr1:16642764-16656865	14.4535	15.8867	0.136396	0.48495	0.927087	no
XLOC_000669	Jph1	chr1:16994939-17097889	31.8283	29.7159	-0.0990732	0.3823	0.898715	no
XLOC_000675	Il17f	chr1:20777145-20784270	1.306	0.722588	-0.853912	1	1	no
XLOC_000676	Mcm3	chr1:20803013-20820213	47.0539	47.9617	0.0275711	0.81385	0.984349	no
XLOC_000678	Tram2	chr1:21001377-21079225	16.2686	17.8326	0.132429	0.43875	0.915888	no
XLOC_000682	Rims1	chr1:22468190-22805724	1.82783	1.22172	-0.581214	1	1	no
XLOC_000684	Ogfrl1	chr1:23366423-23383175	6.6481	6.93826	0.0616321	0.66325	0.96726	no
XLOC_000685	Smap1	chr1:23761925-23922289	23.1032	22.4424	-0.0418636	0.78075	0.980857	no
XLOC_000686	1110058L19Rik	chr1:23995938-24005640	3.43068	4.04659	0.238213	0.58895	0.954453	no
XLOC_000687	Fam135a	chr1:24010757-24100341	37.1192	31.6543	-0.229763	0.04085	0.50442	no
XLOC_000689	Bai3	chr1:25067475-25829707	21.4232	19.545	-0.132375	0.2812	0.85218	no
XLOC_000690	Gm20172	chr1:25067475-25829707	11.1946	10.516	-0.0902173	0.79185	0.98136	no
XLOC_000693	Phf3	chr1:30802341-30863256	46.8998	45.6188	-0.0399547	0.71915	0.975087	no
XLOC_000694	Ptp4a1	chr1:30940302-30949755	64.0923	55.8952	-0.197426	0.0834	0.642777	no
XLOC_000695	4931428L18Rik	chr1:31141077-31222656	10.8453	11.3827	0.069772	0.7368	0.976839	no
XLOC_000697	Gm5415	chr1:32172805-32657738	1.55366	2.05436	0.403019	1	1	no
XLOC_000698	Prim2	chr1:33453810-33669758	24.1803	22.4541	-0.106853	0.42805	0.913019	no
XLOC_000699	Bag2	chr1:33745483-33757750	11.883	12.1908	0.0368979	0.82665	0.985547	no
XLOC_000700	Zfp451	chr1:33761752-33814427	23.9625	24.2301	0.0160215	0.8954	0.99342	no
XLOC_000702	Bend6	chr1:33852051-33907621	0.962498	1.07446	0.158755	1	1	no
XLOC_000703	Mir5103	chr1:34433120-34433199	127.727	154.679	0.276208	1	1	no
XLOC_000704	Ccdc115	chr1:34436669-34439672	12.0456	13.1537	0.126958	0.4617	0.91979	no
XLOC_000707	Fam168b	chr1:34813217-34843050	57.3491	60.9133	0.0869875	0.4427	0.916013	no
XLOC_000708	Uggt1	chr1:36140027-36244302	18.7913	18.7155	-0.00582828	0.957	0.995122	no
XLOC_000709	Neurl3	chr1:36264601-36273425	7.98613	8.00847	0.00402928	0.98655	0.995455	no
XLOC_000710	4632411B12Rik	chr1:36335729-36369181	31.5528	28.6793	-0.137759	0.22665	0.804184	no
XLOC_000711	Lman2l	chr1:36423185-36445239	12.648	13.0551	0.0457137	0.76195	0.978488	no
XLOC_000712	Ankrd23	chr1:36530533-36535729	7.71272	8.5249	0.144444	0.43485	0.915381	no
XLOC_000713	Ankrd39	chr1:36538172-36547201	1.98575	1.55543	-0.352376	1	1	no
XLOC_000714	Sema4c	chr1:36548641-36558381	7.17023	7.17487	0.000934293	0.9885	0.995455	no
XLOC_000716	Actr1b	chr1:36699201-36709925	31.966	31.2587	-0.0322819	0.80135	0.982409	no
XLOC_000717	Tmem131	chr1:36792188-36939527	59.8783	69.8993	0.223244	0.04755	0.52991	no
XLOC_000718	6330578E17Rik	chr1:37417084-37430103	12.2501	14.7006	0.263073	0.0451	0.525229	no
XLOC_000719	Mgat4a	chr1:37439339-37536259	2.30177	2.41934	0.0718687	0.72665	0.976102	no
XLOC_000720	4930594C11Rik	chr1:37439339-37536259	4.15251	3.46369	-0.261677	0.329	0.87327	no
XLOC_000722	Tsga10	chr1:37754775-37865079	3.57126	3.63671	0.0262016	0.89575	0.993519	no
XLOC_000723	Mitd1	chr1:37878889-37890411	4.74358	4.61955	-0.0382246	0.9035	0.993721	no
XLOC_000726	Txndc9	chr1:37983866-37997208	12.4768	13.6381	0.128395	0.31585	0.87327	no
XLOC_000727	Rev1	chr1:37998009-38129662	28.2423	25.9395	-0.122703	0.6476	0.966913	no
XLOC_000728	Aff3	chr1:38177326-38664955	16.5278	17.7704	0.104586	0.37855	0.896614	no
XLOC_000729	Lonrf2	chr1:38794508-38821215	3.10053	3.89856	0.330427	0.05925	0.558849	no
XLOC_000730	Chst10	chr1:38863872-38898160	2.69006	2.3083	-0.220806	0.35475	0.886379	no
XLOC_000731	Tbc1d8	chr1:39367850-39478747	9.17946	8.20263	-0.162323	0.6094	0.960579	no
XLOC_000732	Snord89	chr1:39548746-39548840	163.164	325.702	0.997228	0.25425	0.827127	no
XLOC_000733	Rnf149	chr1:39551295-39577347	28.4233	27.9453	-0.0244671	0.85375	0.987741	no
XLOC_000734	Creg2	chr1:39618405-39651182	3.97041	4.63702	0.223908	0.1555	0.743458	no
XLOC_000741	2610017I09Rik	chr1:42648199-42694825	77.1174	73.7463	-0.0644864	0.67815	0.96726	no
XLOC_000742	Tgfbrap1	chr1:43047268-43098622	10.3979	10.7245	0.0446092	0.72705	0.97618	no
XLOC_000743	Fhl2	chr1:43123073-43163961	0.555542	1.3515	1.2826	1	1	no
XLOC_000744	Uxs1	chr1:43750230-43827708	11.9263	12.8562	0.108311	0.56555	0.944817	no
XLOC_000745	A530098C11Rik	chr1:44009407-44020006	5.96738	8.36223	0.486791	0.0543	0.547893	no
XLOC_000746	1700029F09Rik	chr1:44086616-44102388	13.6726	12.2866	-0.154202	0.4033	0.906705	no
XLOC_000747	Kdelc1	chr1:44106545-44118773	21.8022	21.3676	-0.0290505	0.8252	0.985547	no
XLOC_000748	4832428D23Rik	chr1:44204069-44218931	1.81124	2.02495	0.160909	1	1	no
XLOC_000750	Col5a2	chr1:45374330-45503282	1.6078	2.30603	0.520324	0.0082	0.255903	no
XLOC_000754	Slc39a10	chr1:46807543-46853509	37.1477	44.5159	0.261048	0.01955	0.372788	no
XLOC_000756	Obfc2a	chr1:51469487-51478399	1.22214	1.18923	-0.0393811	1	1	no
XLOC_000757	Myo1b	chr1:51749765-51915974	35.464	31.1553	-0.186879	0.09785	0.666851	no
XLOC_000758	Gls	chr1:52163449-52233232	21.7621	21.139	-0.0419137	0.725	0.976061	no
XLOC_000759	Nab1	chr1:52455848-52500448	2.73593	2.62126	-0.0617708	0.7437	0.976839	no
XLOC_000760	Mfsd6	chr1:52656304-52727318	3.89193	4.53392	0.220273	0.19895	0.783318	no
XLOC_000761	Inpp1	chr1:52789419-52817688	1.8839	1.83824	-0.0354018	1	1	no
XLOC_000764	Pms1	chr1:53189188-53296996	8.98932	7.93906	-0.179243	0.24475	0.819179	no
XLOC_000765	Asnsd1	chr1:53344643-53352699	14.3164	15.0442	0.0715403	0.62265	0.964014	no
XLOC_000767	Stk17b	chr1:53755511-53785215	5.90944	6.90896	0.225448	0.1732	0.762641	no
XLOC_000769	Gtf3c3	chr1:54397580-54438971	14.429	15.7748	0.128657	0.3421	0.878339	no
XLOC_000770	Pgap1	chr1:54472999-54557684	21.0201	22.224	0.0803533	0.46875	0.922319	no
XLOC_000771	Ankrd44	chr1:54645339-54926387	4.21504	3.85946	-0.127147	0.41395	0.90999	no
XLOC_000772	Sf3b1	chr1:54985169-55027478	90.4652	96.2462	0.0893666	0.44315	0.916013	no
XLOC_000773	Hspd1	chr1:55077833-55087932	118.891	147.128	0.307429	0.00545	0.205445	no
XLOC_000774	Rftn2	chr1:55170159-55226782	1.40149	1.60832	0.19859	1	1	no
XLOC_000777	Satb2	chr1:56793980-56971334	12.4686	13.7412	0.140219	0.263	0.835063	no
XLOC_000779	4930558J18Rik	chr1:57359221-57377544	2.10197	3.07257	0.547707	0.055	0.550096	no
XLOC_000780	1110034B05Rik	chr1:57388243-57415958	20.8436	25.7673	0.30594	0.05385	0.547893	no
XLOC_000781	Kctd18	chr1:57955100-57970084	10.2791	11.5266	0.165255	0.30895	0.869524	no
XLOC_000782	Clk1	chr1:58411987-58424088	79.06	78.4216	-0.0116954	0.9273	0.995122	no
XLOC_000783	Ppil3	chr1:58430992-58445486	12.4536	10.8557	-0.19811	0.3647	0.888188	no
XLOC_000784	Orc2	chr1:58462770-58504919	21.9412	20.9895	-0.0639736	0.6025	0.959308	no
XLOC_000785	Fam126b	chr1:58522805-58586333	5.28003	5.02769	-0.0706495	0.59035	0.954961	no
XLOC_000787	Trak2	chr1:58900449-58973482	9.32874	9.60517	0.042129	0.74445	0.976839	no
XLOC_000789	Als2cr4	chr1:59100592-59120096	6.08117	5.89649	-0.0444918	0.82795	0.985547	no
XLOC_000790	Als2,Mpp4	chr1:59120934-59237231	25.088	21.4192	-0.228094	0.09925	0.669393	no
XLOC_000791	Sumo1	chr1:59639433-59670834	37.2151	37.4118	0.00760462	0.9614	0.995387	no
XLOC_000792	Ica1l	chr1:59989067-60043087	5.84677	5.2534	-0.154388	0.35765	0.88774	no
XLOC_000793	Wdr12	chr1:60076867-60151034	17.6093	18.3477	0.0592601	0.6673	0.96726	no
XLOC_000794	Raph1	chr1:60483184-60566765	19.4696	20.014	0.0397844	0.7211	0.975531	no
XLOC_000796	Ino80d	chr1:63047800-63114267	33.7877	31.3486	-0.108097	0.3397	0.876185	no
XLOC_000797	Ndufs1	chr1:63114470-63176822	18.5045	17.9941	-0.0403467	0.7848	0.98136	no
XLOC_000803	Klf7	chr1:64035670-64121389	23.8748	25.2268	0.0794668	0.6001	0.959266	no
XLOC_000804	Mettl21a	chr1:64606479-64617168	5.30678	4.04601	-0.391336	0.0523	0.544053	no
XLOC_000805	2810408I11Rik	chr1:64679868-64690659	8.80757	7.08388	-0.314204	0.29985	0.862692	no
XLOC_000807	Plekhm3	chr1:64789120-64956824	3.12653	2.51579	-0.313553	0.0472	0.52991	no
XLOC_000815	Idh1	chr1:65158615-65186479	15.5735	15.4805	-0.00864044	0.9531	0.995122	no
XLOC_000816	1110028C15Rik	chr1:66700892-66817595	14.049	13.5436	-0.0528517	0.74585	0.976839	no
XLOC_000817	Acadl	chr1:66830852-66863267	3.19759	2.367	-0.433927	0.1314	0.716775	no
XLOC_000819	Lancl1	chr1:67000516-67038872	7.45969	6.58125	-0.180754	0.22495	0.804184	no
XLOC_000821	Ikzf2	chr1:69531209-69685960	3.88427	3.25804	-0.253638	0.075	0.618074	no
XLOC_000822	Bard1	chr1:71027534-71102972	14.2013	12.8905	-0.139723	0.25665	0.82795	no
XLOC_000824	Fn1	chr1:71585522-71653171	93.9261	108.773	0.211719	0.08255	0.638379	no
XLOC_000826	Mreg	chr1:72159232-72212307	1.74489	2.05031	0.232701	1	1	no
XLOC_000827	Pecr	chr1:72259172-72284314	2.05826	3.55496	0.788407	0.04545	0.525229	no
XLOC_000828	2017-03-04	chr1:72427111-72536564	1.18453	0.767381	-0.626298	1	1	no
XLOC_000830	Igfbp5	chr1:72858064-72874865	42.9935	47.0412	0.129807	0.24385	0.81794	no
XLOC_000834	Tns1	chr1:73910230-74124447	11.4	10.4888	-0.120186	0.31425	0.872263	no
XLOC_000836	Aamp	chr1:74279839-74284738	8.47248	8.21545	-0.0444453	0.81405	0.984349	no
XLOC_000837	Tmbim1	chr1:74285033-74353692	5.4566	4.76764	-0.194728	0.57675	0.948954	no
XLOC_000838	Usp37	chr1:74409383-74588028	26.9864	24.8035	-0.121688	0.4904	0.927519	no
XLOC_000839	Zfp142	chr1:74409383-74588028	19.7263	19.792	0.00480003	0.9799	0.995455	no
XLOC_000840	Rnf25	chr1:74593751-74601397	7.39976	6.10181	-0.278241	0.21205	0.794892	no
XLOC_000847	Nhej1	chr1:74967345-75046639	4.37536	3.4536	-0.341302	0.35855	0.88774	no
XLOC_000849	1810031K17Rik	chr1:75135214-75142368	13.0517	11.7089	-0.156623	0.28245	0.853703	no
XLOC_000850	Abcb6	chr1:75171640-75180283	4.2485	4.7929	0.173946	0.3703	0.891373	no
XLOC_000851	Atg9a	chr1:75180865-75191923	7.37592	7.66717	0.0558719	0.711	0.973203	no
XLOC_000852	Glb1l	chr1:75192134-75210778	10.5616	9.26181	-0.189464	0.2323	0.810403	no
XLOC_000853	Tuba4a	chr1:75210828-75219253	2.51783	3.5864	0.510353	0.2686	0.841769	no
XLOC_000857	Dnpep	chr1:75308564-75317637	4.25824	5.65843	0.410143	0.0886	0.64986	no
XLOC_000859	Chpf	chr1:75474568-75479471	3.42423	3.71123	0.116117	0.58885	0.954427	no
XLOC_000860	Obsl1	chr1:75485824-75506452	10.578	9.69612	-0.125582	0.3339	0.873524	no
XLOC_000861	Epha4	chr1:77367184-77515088	92.2799	84.9617	-0.119203	0.3	0.862906	no
XLOC_000863	Farsb	chr1:78424835-78488846	22.458	23.7715	0.0820054	0.5332	0.939662	no
XLOC_000865	Ap1s3	chr1:79606875-79671972	14.1209	12.4438	-0.182396	0.1857	0.771628	no
XLOC_000866	Wdfy1	chr1:79702261-79761769	13.4093	12.7563	-0.0720211	0.7792	0.980857	no
XLOC_000869	Cul3	chr1:80266817-80340430	55.6896	56.2331	0.0140122	0.90345	0.993721	no
XLOC_000870	Dock10	chr1:80501072-80758553	1.0582	1.01026	-0.0668805	1	1	no
XLOC_000871	Irs1	chr1:82233104-82291439	59.0587	56.0053	-0.0765868	0.50205	0.931004	no
XLOC_000873	Tm4sf20	chr1:82756648-82768456	2.98498	1.92447	-0.633255	0.0618	0.568348	no
XLOC_000877	Dner	chr1:84369838-84696221	0.820234	1.03307	0.332827	1	1	no
XLOC_000878	Trip12	chr1:84721188-84839304	50.8165	50.2675	-0.0156715	0.89435	0.99322	no
XLOC_000879	Slc16a14	chr1:84906704-84935083	30.2891	25.7564	-0.233867	0.069	0.595705	no
XLOC_000882	Sp110	chr1:85576898-85645036	1.30393	1.64541	0.335584	1	1	no
XLOC_000885	Htr2b	chr1:86064618-86139295	5.12051	4.88521	-0.0678676	0.889	0.992905	no
XLOC_000886	Ncl	chr1:86344718-86359455	92.3113	109.693	0.248889	0.03945	0.497349	no
XLOC_000887	Snora75	chr1:86344718-86359455	169.948	396.186	1.22109	0.72185	0.975826	no
XLOC_000888	Snord82	chr1:86344718-86359455	1736.93	606.472	-1.51803	0.6015	0.959266	no
XLOC_000890	Pde6d	chr1:86543014-86582501	15.6025	14.197	-0.136196	0.46705	0.922311	no
XLOC_000895	Kcnj13	chr1:87326997-87450810	17.86	13.2769	-0.427818	0.33095	0.87327	no
XLOC_000897	Usp40	chr1:87945120-88008551	25.101	22.8249	-0.137132	0.24725	0.820904	no
XLOC_000898	Dnajb3	chr1:88055410-88220002	1.60044	1.82028	0.185696	1	1	no
XLOC_000899	A730008H23Rik,Hjurp	chr1:88227019-88277579	158.29	150.93	-0.0686877	0.61175	0.961526	no
XLOC_000901	Arl4c	chr1:88698225-88702191	14.2323	12.6235	-0.173055	0.1917	0.77668	no
XLOC_000903	4933400F21Rik	chr1:89454810-89895282	8.79044	7.24396	-0.279157	0.41125	0.909272	no
XLOC_000909	Ilkap	chr1:91375830-91398783	39.6634	41.983	0.0819993	0.53035	0.939662	no
XLOC_000911	Hes6	chr1:91411482-91413222	19.8741	22.2398	0.16226	0.3209	0.87327	no
XLOC_000912	Per2	chr1:91415981-91459328	5.58201	4.89477	-0.189544	0.2004	0.78563	no
XLOC_000913	Hdac4	chr1:91932748-92148393	21.5078	21.3328	-0.0117846	0.92515	0.995122	no
XLOC_000914	Ndufa10	chr1:92439718-92473758	35.552	43.3225	0.285187	0.03795	0.4909	no
XLOC_000918	Myeov2	chr1:92637144-92641985	17.0985	14.5178	-0.23605	0.45565	0.91979	no
XLOC_000922	Kif1a	chr1:93015455-93101865	60.6892	59.2355	-0.0349772	0.7586	0.977915	no
XLOC_000924	Mterfd2	chr1:93299210-93305870	7.91861	7.12095	-0.153177	0.32565	0.87327	no
XLOC_000925	Pask	chr1:93309436-93342788	14.1528	13.0124	-0.121204	0.32355	0.87327	no
XLOC_000926	Hdlbp	chr1:93405939-93478808	44.5401	50.4938	0.181003	0.10605	0.677084	no
XLOC_000927	Stk25	chr1:93512103-93635727	24.0135	24.4559	0.0263319	0.8378	0.986836	no
XLOC_000928	Thap4	chr1:93705390-93754838	7.80985	8.28311	0.0848781	0.64295	0.96688	no
XLOC_000929	Dtymk	chr1:93792575-93801934	120.813	125.62	0.0562952	0.67165	0.96726	no
XLOC_000931	St8sia4	chr1:95587681-95667594	13.094	12.886	-0.0230977	0.9074	0.993894	no
XLOC_000938	D1Ertd622e	chr1:97643901-97662018	11.9153	10.5066	-0.181523	0.22355	0.804184	no
XLOC_000939	Ppip5k2	chr1:97706045-97770092	21.2151	21.2348	0.00133649	0.9904	0.995455	no
XLOC_000940	Pam	chr1:97821093-98095632	4.66214	6.04582	0.374945	0.0419	0.508049	no
XLOC_000941	B230216N24Rik	chr1:97821093-98095632	4.21747	5.98775	0.505634	0.24345	0.81794	no
XLOC_000942	Rnf152	chr1:105276916-105356710	4.78422	4.22314	-0.179967	0.18865	0.77668	no
XLOC_000943	Pign	chr1:105518421-105663676	7.52827	7.2256	-0.0592011	0.6426	0.96688	no
XLOC_000944	LOC626049	chr1:106152624-106171524	4.02294	4.32137	0.103238	0.82505	0.985547	no
XLOC_000945	Bcl2	chr1:106538178-106714290	19.5518	16.4	-0.253605	0.08085	0.633643	no
XLOC_000946	Kdsr	chr1:106720409-106759742	4.45286	4.03248	-0.143067	0.35955	0.88774	no
XLOC_000947	Vps4b	chr1:106770787-106796725	17.3141	16.6195	-0.0590675	0.6381	0.965854	no
XLOC_000953	Dsel	chr1:111858701-111864918	4.09684	3.72935	-0.135587	0.4018	0.905961	no
XLOC_000954	Tsn	chr1:118298517-118311132	25.0902	27.7321	0.144438	0.2419	0.817208	no
XLOC_000955	2900060B14Rik	chr1:118389057-118609462	2.48644	2.05517	-0.274822	0.90895	0.994161	no
XLOC_000956	Gli2	chr1:118834060-119053619	27.1288	26.5482	-0.0312097	0.78105	0.980857	no
XLOC_000957	Inhbb	chr1:119415464-119422248	10.6308	9.76186	-0.123023	0.36935	0.891123	no
XLOC_000958	Ralb	chr1:119470304-119504782	4.83738	5.96078	0.301275	0.13455	0.719084	no
XLOC_000959	Epb4.1l5	chr1:119545032-119649000	29.7932	26.8023	-0.152627	0.2358	0.812706	no
XLOC_000960	Ptpn4	chr1:119658092-119837071	24.9913	23.8358	-0.0682933	0.5521	0.942298	no
XLOC_000961	Tmem177	chr1:119907898-119913168	8.46769	8.41418	-0.00914546	0.9476	0.995122	no
XLOC_000964	Dbi	chr1:120113279-120121096	130.495	157.192	0.268537	0.03815	0.492372	no
XLOC_000967	Insig2	chr1:121304352-121332580	6.65356	5.22132	-0.34971	0.0622	0.56927	no
XLOC_000969	Ddx18	chr1:121553834-121567980	31.3197	39.5961	0.338285	0.00685	0.232114	no
XLOC_000971	Actr3	chr1:125392904-125435727	41.8092	43.2204	0.0478924	0.68705	0.96726	no
XLOC_000972	Lypd1	chr1:125676995-125912214	1.39968	1.06806	-0.390097	1	1	no
XLOC_000973	Nckap5	chr1:125913635-126830632	39.7444	36.9596	-0.104802	0.351	0.884438	no
XLOC_000974	Tmem163	chr1:127490341-127678021	2.26688	1.55476	-0.544014	1	1	no
XLOC_000977	Zranb3	chr1:127954185-128102408	21.8894	19.3074	-0.181078	0.13505	0.720141	no
XLOC_000979	Mcm6	chr1:128331590-128359656	61.3514	60.2774	-0.025479	0.82255	0.985547	no
XLOC_000980	Dars	chr1:128363706-128417416	16.4569	15.5759	-0.0793808	0.59185	0.956274	no
XLOC_000981	Cxcr4	chr1:128588198-128592299	12.1136	11.9335	-0.0216203	0.8971	0.993721	no
XLOC_000987	Pfkfb2	chr1:130689042-130729253	12.2825	10.9015	-0.172076	0.2498	0.822752	no
XLOC_000991	Mapkapk2	chr1:131053703-131097543	17.2055	17.1115	-0.00790995	0.9547	0.995122	no
XLOC_000992	Dyrk3	chr1:131128440-131138234	9.00063	7.65268	-0.234062	0.19845	0.782699	no
XLOC_000993	Rassf5	chr1:131176409-131245178	3.47524	2.77239	-0.325984	0.12345	0.7113	no
XLOC_000995	Srgap2	chr1:131285250-131527361	24.0346	24.3135	0.0166499	0.8864	0.992746	no
XLOC_000996	Mfsd4	chr1:132026620-132068062	17.0135	16.0852	-0.0809406	0.5534	0.942298	no
XLOC_000998	Tmcc2	chr1:132356314-132391281	4.83964	5.55088	0.197816	0.2689	0.842048	no
XLOC_000999	Cntn2	chr1:132509424-132542940	0.93614	1.23575	0.400587	1	1	no
XLOC_001000	Nfasc	chr1:132564689-132741797	10.9215	10.8068	-0.0152334	0.8981	0.993721	no
XLOC_001001	Mdm4	chr1:132989844-133025348	89.141	81.8136	-0.123749	0.2642	0.835694	no
XLOC_001002	Gm19461	chr1:133246096-133303435	1.82107	1.17565	-0.63132	1	1	no
XLOC_001003	Sox13	chr1:133382299-133424212	17.6662	16.0262	-0.140557	0.27595	0.847667	no
XLOC_001004	Snrpe	chr1:133603870-133610280	35.1292	41.9394	0.255637	0.2017	0.786576	no
XLOC_001005	Zc3h11a	chr1:133619870-133661380	72.3401	66.7861	-0.115247	0.5097	0.93418	no
XLOC_001006	Zbed6	chr1:133619870-133661380	70.6149	61.6084	-0.196845	0.23815	0.815296	no
XLOC_001008	Atp2b4	chr1:133702673-133753747	2.45627	2.68976	0.131009	0.4188	0.90999	no
XLOC_001011	Btg2	chr1:134074864-134079155	46.1074	41.2288	-0.161344	0.1639	0.754487	no
XLOC_001014	Tmem183a	chr1:134346096-134361999	18.5809	20.5549	0.14566	0.2567	0.82795	no
XLOC_001016	Ppp1r12b	chr1:134765942-134955940	47.8503	43.4793	-0.138198	0.2291	0.806404	no
XLOC_001021	Rnpep	chr1:135262698-135284084	12.129	13.0396	0.104438	0.50125	0.931004	no
XLOC_001022	Timm17a	chr1:135301534-135313737	19.1979	24.8345	0.371394	0.0422	0.509653	no
XLOC_001023	Shisa4	chr1:135371455-135375063	17.7496	13.1754	-0.429942	0.01915	0.367957	no
XLOC_001024	Ipo9	chr1:135382314-135430491	68.7259	68.3028	-0.00891027	0.9362	0.995122	no
XLOC_001025	Nav1	chr1:135434579-135585355	12.4172	13.1449	0.0821669	0.4717	0.923675	no
XLOC_001031	Camsap2	chr1:136268122-136346104	30.3197	29.6483	-0.0323057	0.77195	0.980416	no
XLOC_001035	Nek7	chr1:138484713-138619696	16.4789	14.2886	-0.205753	0.11555	0.70315	no
XLOC_001037	Lhx9	chr1:138825185-138847579	8.53667	10.3205	0.273773	0.1196	0.710024	no
XLOC_001038	2310009B15Rik	chr1:138851978-138856854	4.36668	4.17675	-0.0641558	0.9263	0.995122	no
XLOC_001039	Crb1	chr1:139198253-139377076	1.19484	1.11408	-0.100965	1	1	no
XLOC_001044	4930590L20Rik	chr1:140246256-140656402	1.09905	1.05484	-0.0592435	1	1	no
XLOC_001045	Cdc73	chr1:143607498-143702684	45.7761	42.2612	-0.115259	0.43535	0.915505	no
XLOC_001046	Trove2	chr1:143750790-143777051	18.7122	16.9516	-0.142557	0.2066	0.791004	no
XLOC_001047	Rgs2	chr1:143999337-144004149	5.23992	4.90545	-0.0951597	0.60225	0.959266	no
XLOC_001054	BC003331	chr1:150361310-150466165	8.14203	8.32396	0.0318827	0.96155	0.995397	no
XLOC_001055	Prg4	chr1:150361310-150466165	3.52138	3.6071	0.0347011	0.98005	0.995455	no
XLOC_001056	Hmcn1	chr1:150562501-150993435	1.44282	1.81008	0.327162	1	1	no
XLOC_001057	1200016B10Rik	chr1:151367698-151428435	10.4823	8.41536	-0.316857	0.02455	0.404632	no
XLOC_001058	Rnf2	chr1:151469405-151500823	22.4757	23.0101	0.0338978	0.78035	0.980857	no
XLOC_001059	1700025G04Rik	chr1:151884523-152090320	10.4416	11.0723	0.0846064	0.47655	0.924232	no
XLOC_001060	Tsen15	chr1:152370735-152386682	7.61383	9.61682	0.336938	0.15285	0.74214	no
XLOC_001061	Rgl1	chr1:152517529-152625111	13.7663	13.5594	-0.0218503	0.86285	0.98883	no
XLOC_001062	Smg7	chr1:152836994-152902646	54.7308	54.4283	-0.00799615	0.94255	0.995122	no
XLOC_001064	Lamc1	chr1:153218921-153332786	16.4545	20.1605	0.29305	0.0112	0.298893	no
XLOC_001065	E330020D12Rik	chr1:153404185-153414233	83.9274	81.9236	-0.0348618	0.76095	0.97812	no
XLOC_001066	Dhx9	chr1:153455757-153487660	107.094	110.143	0.0404977	0.7253	0.976061	no
XLOC_001067	Npl	chr1:153503015-153549714	2.737	1.60038	-0.774182	0.0456	0.525229	no
XLOC_001068	C230024C17	chr1:153721239-153737829	1.17712	0.80705	-0.544529	1	1	no
XLOC_001072	Cacna1e	chr1:154392518-154725920	1.16304	1.64546	0.500588	1	1	no
XLOC_001073	Ier5	chr1:155096366-155099636	13.138	15.5628	0.244355	0.0739	0.61207	no
XLOC_001075	Xpr1	chr1:155275656-155417444	23.4604	25.4497	0.117426	0.30435	0.867315	no
XLOC_001077	Qsox1	chr1:155778154-155812899	3.37656	4.52648	0.422835	0.07915	0.63044	no
XLOC_001078	Cep350	chr1:155844963-155973255	19.7734	19.593	-0.0132238	0.9043	0.993721	no
XLOC_001079	Tor1aip1	chr1:156004598-156068859	25.6386	27.6876	0.110921	0.5742	0.947899	no
XLOC_001082	Soat1	chr1:156428107-156474328	9.507	9.15074	-0.0551015	0.68475	0.96726	no
XLOC_001083	Tor3a	chr1:156653616-156674339	4.63501	4.29084	-0.111313	0.54865	0.942298	no
XLOC_001084	Fam20b	chr1:156678570-156718910	6.16476	5.67642	-0.119063	0.44685	0.918302	no
XLOC_001085	Ralgps2	chr1:156804165-156939626	15.4739	14.2319	-0.120708	0.34655	0.881118	no
XLOC_001086	1700057K13Rik	chr1:157099147-157108645	1.63759	1.01349	-0.692251	1	1	no
XLOC_001087	Rasal2	chr1:157135182-157420236	31.7035	27.4295	-0.208916	0.0699	0.598499	no
XLOC_001092	Cacybp	chr1:160202366-160212892	17.8397	19.4055	0.121373	0.3904	0.901186	no
XLOC_001093	Rabgap1l	chr1:160219173-160792938	12.5132	10.8959	-0.199659	0.16145	0.752254	no
XLOC_001094	Gpr52	chr1:160219173-160792938	1.36052	1.66031	0.287299	1	1	no
XLOC_001095	Zbtb37	chr1:161017755-161034259	11.0784	10.4469	-0.0846713	0.5291	0.939662	no
XLOC_001096	Dars2	chr1:161040612-161070632	8.64997	9.79448	0.179274	0.21805	0.803	no
XLOC_001097	Klhl20	chr1:161088377-161131479	20.5522	20.1008	-0.0320417	0.7884	0.98136	no
XLOC_001098	4930469G21Rik	chr1:161142711-161170507	3.261	2.97369	-0.133063	0.8172	0.985437	no
XLOC_001099	Prdx6	chr1:161240111-161251166	28.0781	30.0064	0.0958254	0.45095	0.91912	no
XLOC_001101	AI848100	chr1:161816111-161876661	21.0708	21.1069	0.00246693	0.9813	0.995455	no
XLOC_001104	Mettl13	chr1:162533671-162548345	6.96093	7.57128	0.121258	0.4747	0.923675	no
XLOC_001106	Prrc2c	chr1:162671784-162740556	201.648	213.704	0.0837715	0.59985	0.959266	no
XLOC_001113	Prrx1	chr1:163245118-163313650	15.9253	14.3826	-0.147	0.2407	0.816896	no
XLOC_001114	Gorab	chr1:163384908-163403641	6.96661	6.52972	-0.093435	0.5972	0.95871	no
XLOC_001116	BC055324	chr1:163930063-163994781	21.788	20.7978	-0.067098	0.6743	0.96726	no
XLOC_001118	Blzf1	chr1:164289799-164307484	7.0591	7.61401	0.109172	0.45945	0.91979	no
XLOC_001119	Atp1b1	chr1:164307674-164458355	4.12987	4.11155	-0.00641186	0.98765	0.995455	no
XLOC_001123	Sft2d2	chr1:165174340-165194433	7.2204	7.48766	0.0524358	0.70015	0.968438	no
XLOC_001124	Tiprl	chr1:165212285-165236958	7.58072	8.27669	0.126719	0.36835	0.890244	no
XLOC_001125	Dcaf6	chr1:165329500-165460463	12.1468	10.8536	-0.162406	0.2454	0.819383	no
XLOC_001126	Mpzl1	chr1:165592180-165634541	31.88	34.342	0.107324	0.3857	0.899859	no
XLOC_001128	Pou2f1	chr1:165788680-166002634	44.4685	35.556	-0.32269	0.0055	0.20597	no
XLOC_001131	Pogk	chr1:166379166-166409828	31.8742	32.3083	0.0195147	0.8736	0.991523	no
XLOC_001136	Uck2	chr1:167226083-167285127	41.9685	54.4371	0.375284	0.00435	0.186788	no
XLOC_001137	Mgst3	chr1:167372383-167393797	0.913134	1.37506	0.590593	1	1	no
XLOC_001139	Pbx1	chr1:168119363-168432258	121.472	116.84	-0.0560829	0.6442	0.96688	no
XLOC_001140	Nuf2	chr1:169497933-169531464	36.5546	37.8431	0.0499756	0.67315	0.96726	no
XLOC_001142	Hsd17b7	chr1:169949536-169969205	9.7294	10.0991	0.0538063	0.6883	0.96726	no
XLOC_001144	Uap1	chr1:170142002-170174946	7.51481	6.64187	-0.178147	0.3247	0.87327	no
XLOC_001145	Uhmk1	chr1:170199255-170215393	19.4274	18.4138	-0.0773071	0.5888	0.954427	no
XLOC_001146	Gm7694	chr1:170298192-170306332	18.1928	16.8764	-0.108359	0.3833	0.898715	no
XLOC_001147	Nos1ap	chr1:170317495-170589849	14.2423	13.2346	-0.105871	0.55185	0.942298	no
XLOC_001148	Atf6	chr1:170704456-170867771	10.2706	11.0317	0.103143	0.39695	0.904175	no
XLOC_001149	Dusp12	chr1:170874187-170885540	7.48672	8.82619	0.237457	0.27965	0.849511	no
XLOC_001154	Sdhc	chr1:171129156-171150603	33.2865	40.395	0.279238	0.04955	0.53598	no
XLOC_001156	Tomm40l	chr1:171213969-171222514	3.05592	3.49757	0.194744	0.38275	0.898715	no
XLOC_001157	Fcer1g	chr1:171229571-171234349	1.16178	1.73375	0.577556	1	1	no
XLOC_001158	Ndufs2	chr1:171234859-171247112	47.7315	56.1535	0.234434	0.0583	0.558849	no
XLOC_001159	Ppox	chr1:171276991-171281186	14.5591	11.8441	-0.297754	0.0719	0.603854	no
XLOC_001160	Usp21	chr1:171281952-171287961	30.8492	28.6316	-0.107627	0.39835	0.904364	no
XLOC_001161	Ufc1	chr1:171288563-171294982	7.61217	10.1315	0.412465	0.1014	0.672036	no
XLOC_001162	Nit1	chr1:171329144-171345645	8.98142	10.5355	0.230238	0.38255	0.898715	no
XLOC_001163	Klhdc9	chr1:171358448-171360798	4.50581	6.23263	0.468054	0.0584	0.558849	no
XLOC_001167	Vangl2	chr1:172004370-172027268	127.172	137.421	0.111821	0.3186	0.87327	no
XLOC_001168	Nhlh1	chr1:172052291-172057596	12.879	12.5036	-0.0426804	0.7797	0.980857	no
XLOC_001169	Ncstn	chr1:172066012-172122332	38.524	40.1103	0.0582147	0.7937	0.98136	no
XLOC_001170	Pea15a	chr1:172196728-172206781	109.151	106.153	-0.0401736	0.71975	0.975133	no
XLOC_001171	Casq1	chr1:172209893-172219895	9.26025	8.37041	-0.145754	0.4151	0.90999	no
XLOC_001173	Atp1a2	chr1:172271708-172298064	8.72816	7.40321	-0.237527	0.07305	0.608147	no
XLOC_001174	Kcnj9	chr1:172321032-172329263	8.33236	9.97475	0.259556	0.0941	0.660904	no
XLOC_001176	Slamf8	chr1:172581376-172590568	2.36858	1.92271	-0.300882	1	1	no
XLOC_001177	Fcrl6	chr1:172596639-172602551	1.32532	1.31549	-0.0107403	1	1	no
XLOC_001184	Darc	chr1:173331885-173333503	7.5816	8.2617	0.123936	0.60045	0.959266	no
XLOC_001185	Cadm3	chr1:173334253-173367695	10.4669	10.2984	-0.023413	0.8606	0.988314	no
XLOC_001192	Ifi203	chr1:173920402-173942492	3.05801	3.27557	0.0991524	0.6203	0.963979	no
XLOC_001199	Fh1	chr1:175601377-175625635	14.591	16.8876	0.210889	0.1881	0.776184	no
XLOC_001200	Opn3	chr1:175662427-175692590	4.95362	3.12455	-0.664835	0.1907	0.77668	no
XLOC_001201	Chml	chr1:175662427-175692590	12.8433	10.8719	-0.240409	0.0582	0.558849	no
XLOC_001203	Cep170	chr1:176733652-176807124	49.8803	47.7563	-0.0627786	0.57625	0.948951	no
XLOC_001204	Mir350	chr1:176733652-176807124	46.6469	176.488	1.91972	0.59785	0.958916	no
XLOC_001205	Hmga2-ps1	chr1:176814811-177020432	4.07733	3.01957	-0.43328	0.3419	0.878339	no
XLOC_001206	Akt3	chr1:177022114-177248767	53.2072	51.297	-0.0527464	0.63605	0.965444	no
XLOC_001208	Adss	chr1:177763177-177796509	26.7893	28.355	0.0819457	0.5089	0.93418	no
XLOC_001209	Hnrnpu	chr1:178328299-178337784	230.542	229.554	-0.00619372	0.9588	0.995122	no
XLOC_001210	Smyd3	chr1:178955038-179518003	4.04828	4.60287	0.185226	0.30665	0.867315	no
XLOC_001211	Tfb2m	chr1:179528055-179546267	16.3534	16.1977	-0.0137972	0.924	0.995122	no
XLOC_001212	Ahctf1	chr1:179744903-179804015	32.1161	32.9062	0.0350641	0.7568	0.977517	no
XLOC_001215	Gm5069	chr1:180326968-180423659	2.04541	1.48811	-0.458913	1	1	no
XLOC_001218	H3f3a	chr1:180802567-180813603	117.015	108.145	-0.113729	0.3391	0.876091	no
XLOC_001220	Nvl	chr1:181093422-181144157	37.2617	36.8719	-0.0151714	0.8934	0.993135	no
XLOC_001221	Wdr26	chr1:181173225-181211978	43.9886	40.7065	-0.11187	0.30695	0.867315	no
XLOC_001222	Ccdc121	chr1:181509632-181511451	2.28015	1.01389	-1.16923	1	1	no
XLOC_001223	Lbr	chr1:181815314-181842401	32.7988	33.37	0.0249104	0.8321	0.985547	no
XLOC_001224	Enah	chr1:181904444-182019980	57.0607	54.3689	-0.0697172	0.5391	0.939678	no
XLOC_001226	Degs1	chr1:182275769-182282759	15.8307	19.7101	0.316209	0.02795	0.43083	no
XLOC_001227	Fbxo28	chr1:182313101-182341606	15.7269	15.0406	-0.0643753	0.6059	0.959727	no
XLOC_001228	Capn2	chr1:182467258-182517483	25.0292	27.0793	0.113579	0.35055	0.884076	no
XLOC_001230	Disp1	chr1:183086263-183221529	7.21913	6.88998	-0.0673246	0.6383	0.965854	no
XLOC_001231	Brox	chr1:183276341-183297008	10.9692	9.85155	-0.155037	0.2778	0.848784	no
XLOC_001232	Mia3	chr1:183326235-183369565	24.8537	26.868	0.112432	0.31595	0.87327	no
XLOC_001233	1700056E22Rik	chr1:184033031-184033998	2.53917	2.47388	-0.037578	1	1	no
XLOC_001237	Mosc2	chr1:184813067-184845847	3.51009	4.35737	0.311952	0.20935	0.793048	no
XLOC_001238	Mir1981	chr1:184813067-184845847	115.047	89.5591	-0.36131	0.79635	0.981734	no
XLOC_001240	Mark1	chr1:184896423-184999549	10.431	10.8226	0.0531677	0.6885	0.96726	no
XLOC_001241	Iars2	chr1:185204167-185329401	15.4784	17.3054	0.16097	0.40145	0.905482	no
XLOC_001242	9630028B13Rik	chr1:185429356-185441819	6.49228	7.68576	0.243463	0.13375	0.718238	no
XLOC_001243	Gm2061	chr1:185447115-185468761	1.74956	1.29164	-0.437789	1	1	no
XLOC_001244	Lyplal1	chr1:186087731-186117310	7.56522	5.35278	-0.499093	0.0268	0.42222	no
XLOC_001245	Tgfb2	chr1:186623185-186705992	8.56603	8.61768	0.00867264	0.94605	0.995122	no
XLOC_001246	Rrp15	chr1:186721086-186749358	13.8657	13.907	0.00428587	0.9832	0.995455	no
XLOC_001247	Spata17	chr1:187048406-187215446	1.85072	0.960111	-0.946814	1	1	no
XLOC_001249	Kctd3	chr1:188971097-189007840	13.4097	14.2125	0.0838851	0.52165	0.938472	no
XLOC_001250	Kcnk2	chr1:189207929-189344192	3.46176	2.58092	-0.423616	0.04575	0.525229	no
XLOC_001251	Cenpf	chr1:189640613-189688086	48.9826	57.8729	0.240619	0.0551	0.550614	no
XLOC_001252	Smyd2	chr1:189880491-189922288	13.4556	16.8307	0.322892	0.0503	0.537443	no
XLOC_001253	Prox1	chr1:190121776-190170680	13.5774	16.7869	0.306133	0.0156	0.337078	no
XLOC_001254	Rps6kc1	chr1:190772878-190911770	5.97715	6.23869	0.0617866	0.7031	0.969436	no
XLOC_001255	Vash2	chr1:190947645-190979296	15.4839	16.0908	0.0554658	0.6629	0.96726	no
XLOC_001256	Mfsd7b	chr1:191005831-191029781	7.99371	8.27468	0.0498391	0.73195	0.976839	no
XLOC_001257	Tatdn3	chr1:191045829-191062932	7.21635	7.24774	0.00626262	0.97915	0.995455	no
XLOC_001259	Atf3	chr1:191170296-191183333	4.15001	5.87061	0.500397	0.0272	0.426171	no
XLOC_001260	Nenf	chr1:191306796-191318118	1.33686	1.39373	0.0601093	1	1	no
XLOC_001261	Ppp2r5a	chr1:191325964-191397041	11.1874	10.2473	-0.126631	0.54415	0.941301	no
XLOC_001262	Dtl	chr1:191537364-191575534	48.2842	44.9689	-0.102625	0.36805	0.890017	no
XLOC_001263	1700034H15Rik	chr1:191894071-191913247	4.26499	3.77986	-0.174208	0.48495	0.927087	no
XLOC_001264	Mir3473c	chr1:191998553-191998634	111.172	0	#NAME?	1	1	no
XLOC_001266	Rcor3	chr1:192100461-192151025	14.4144	11.9203	-0.274084	0.13435	0.718955	no
XLOC_001267	Hhat	chr1:192512827-192771219	1.48121	1.19524	-0.309471	1	1	no
XLOC_001268	Sertad4	chr1:192844487-192855752	22.0337	21.6186	-0.0274392	0.82415	0.985547	no
XLOC_001269	Syt14	chr1:192897306-193035698	10.2705	7.81943	-0.393373	0.0317	0.454447	no
XLOC_001270	Diexf	chr1:193104402-193130251	15.4548	16.6488	0.107363	0.37285	0.892605	no
XLOC_001274	Camk1g	chr1:193346345-193370282	1.11773	0.866648	-0.367058	1	1	no
XLOC_001278	Cd46	chr1:195041899-195092248	3.11377	2.96698	-0.0696658	0.8387	0.986897	no
XLOC_001279	Cr1l	chr1:195103787-195131570	18.0771	16.3255	-0.147041	0.33625	0.874035	no
XLOC_001280	Cr2	chr1:195136810-195176715	1.04407	0.921669	-0.179891	1	1	no
XLOC_001283	Plekhg1	chr10:3740376-3967302	5.81641	6.74916	0.21458	0.10565	0.676421	no
XLOC_001284	Mthfd1l	chr10:3973074-4167081	8.32384	9.41897	0.17832	0.22115	0.804184	no
XLOC_001285	Akap12	chr10:4266328-4359471	7.72933	8.48846	0.13516	0.2951	0.858832	no
XLOC_001286	1700052N19Rik	chr10:4432604-4455140	7.82726	8.08641	0.0469932	0.789	0.98136	no
XLOC_001292	Lrp11	chr10:7589799-7625477	1.24198	2.25513	0.860567	1	1	no
XLOC_001293	A630066F11Rik	chr10:7630235-7664623	3.20462	2.57229	-0.317101	0.5216	0.938472	no
XLOC_001294	Nup43	chr10:7667503-7678886	24.7887	28.4043	0.196424	0.18365	0.770272	no
XLOC_001295	Lats1	chr10:7681208-7716461	40.0152	37.8818	-0.0790418	0.4787	0.925006	no
XLOC_001296	Katna1	chr10:7725999-7763150	10.1876	9.94152	-0.0352776	0.84075	0.986897	no
XLOC_001297	Ppil4	chr10:7792893-7822563	18.0273	17.1181	-0.074661	0.5681	0.945455	no
XLOC_001299	Mir5104	chr10:7832469-7870397	215.925	0	#NAME?	0.19865	0.782874	no
XLOC_001301	Gm5177	chr10:10605944-10616313	1.76324	1.80016	0.0298997	1	1	no
XLOC_001303	Shprh	chr10:11149429-11215273	19.9212	18.3189	-0.120974	0.29715	0.861652	no
XLOC_001304	Fbxo30	chr10:11281329-11297969	36.6007	31.8723	-0.199568	0.0804	0.632894	no
XLOC_001306	Sf3b5	chr10:13008449-13009183	14.3602	18.4399	0.360753	0.12635	0.713875	no
XLOC_001307	Plagl1	chr10:13090787-13131695	111.836	98.688	-0.180443	0.1159	0.703336	no
XLOC_001308	Fuca2	chr10:13501027-13517275	2.29915	2.22634	-0.0464228	0.83485	0.986166	no
XLOC_001309	Adat2	chr10:13523841-13563376	6.00555	5.5426	-0.115735	0.7048	0.970608	no
XLOC_001310	Hivep2	chr10:13966378-14151378	2.57184	2.58761	0.00881934	0.95045	0.995122	no
XLOC_001313	Cited2	chr10:17723227-17725674	16.4679	12.8956	-0.352774	0.02515	0.410376	no
XLOC_001315	Reps1	chr10:18055939-18125155	38.9473	46.4297	0.253524	0.02995	0.44386	no
XLOC_001316	Nhsl1	chr10:18407674-18533891	25.8975	24.3129	-0.0910912	0.4233	0.90999	no
XLOC_001318	Gm20139	chr10:19141748-19207947	1.51543	1.24832	-0.27974	1	1	no
XLOC_001320	Ifngr1	chr10:19591957-19610225	1.98245	2.68145	0.435731	0.1377	0.72348	no
XLOC_001324	Mtap7	chr10:20148919-20281590	2.88267	2.38382	-0.274131	0.2439	0.81794	no
XLOC_001325	Gm6251	chr10:20148919-20281590	6.64622	5.01132	-0.407343	0.45825	0.91979	no
XLOC_001326	Bclaf1	chr10:20312468-20342501	164.593	166.909	0.0201526	0.8717	0.990619	no
XLOC_001327	Fam54a	chr10:20347818-20361669	8.99162	9.62478	0.0981722	0.55085	0.942298	no
XLOC_001328	Ahi1	chr10:20952546-21080429	18.8952	17.2568	-0.13085	0.32265	0.87327	no
XLOC_001329	Hbs1l	chr10:21295978-21368889	43.0805	41.7227	-0.0462029	0.71245	0.973478	no
XLOC_001333	Sgk1	chr10:21882183-21999902	0.791929	1.33771	0.756324	1	1	no
XLOC_001334	Raet1a,Raet1b,Raet1c,Raet1d,Raet1e	chr10:22158608-22374139	2.90372	3.60845	0.313475	0.37625	0.894759	no
XLOC_001336	C920009B18Rik	chr10:22158608-22374139	0.975144	1.08492	0.153895	1	1	no
XLOC_001338	Slc2a12	chr10:22645010-22731447	1.79872	1.56668	-0.199258	1	1	no
XLOC_001339	1110021L09Rik	chr10:23796985-23827968	13.0499	13.0386	-0.00125446	0.99135	0.995534	no
XLOC_001352	Stx7	chr10:24149316-24188959	3.33824	4.15775	0.316716	0.15855	0.748257	no
XLOC_001354	Ctgf	chr10:24595441-24598682	2.08997	2.65902	0.347416	0.2053	0.789541	no
XLOC_001355	Med23	chr10:24869985-24913529	16.0631	17.1018	0.090397	0.4527	0.91979	no
XLOC_001356	Epb4.1l2	chr10:25359797-25523518	21.2057	21.4665	0.0176324	0.88365	0.992185	no
XLOC_001359	Arhgap18	chr10:26772511-26918648	5.10002	4.72656	-0.109711	0.52425	0.938472	no
XLOC_001360	Ptprk	chr10:28074819-28597397	18.9764	21.0889	0.152274	0.1907	0.77668	no
XLOC_001362	6330407J23Rik	chr10:29143995-29199628	19.1863	18.5128	-0.0515465	0.6816	0.96726	no
XLOC_001363	9330159F19Rik	chr10:29211642-29230779	5.44712	5.33971	-0.0287325	0.8415	0.986897	no
XLOC_001364	Echdc1	chr10:29313165-29362442	1.03993	0.817448	-0.347293	1	1	no
XLOC_001365	Hddc2	chr10:31313404-31328086	8.6349	12.537	0.537936	0.04775	0.53003	no
XLOC_001368	Rsph4a	chr10:33905110-33916021	2.24552	1.86223	-0.270018	0.2502	0.822752	no
XLOC_001370	Tspyl1	chr10:34282189-34284885	9.433	8.98711	-0.0698596	0.6609	0.96726	no
XLOC_001371	Tspyl4	chr10:34297420-34301320	5.36697	4.69953	-0.191592	0.2647	0.836118	no
XLOC_001372	Col10a1	chr10:34303611-34418528	2.88031	2.62372	-0.134612	0.60045	0.959266	no
XLOC_001375	Hdac2	chr10:36974543-37001888	93.9715	95.0841	0.0169818	0.87765	0.991619	no
XLOC_001376	Lama4	chr10:38965514-39110188	0.638782	1.05537	0.724349	1	1	no
XLOC_001377	Tube1	chr10:39134022-39163794	12.5171	12.1886	-0.0383742	0.8109	0.984349	no
XLOC_001378	Fyn	chr10:39369798-39565374	27.789	25.4272	-0.128139	0.28765	0.856204	no
XLOC_001379	Traf3ip2	chr10:39612933-39732007	5.58207	4.63269	-0.26895	0.23795	0.815296	no
XLOC_001380	Rev3l	chr10:39732159-39875205	58.8519	52.8581	-0.154964	0.1811	0.768975	no
XLOC_001381	Cdk19	chr10:40349307-40483818	16.7662	17.2769	0.0432904	0.71285	0.973478	no
XLOC_001385	Wasf1	chr10:40883533-40938569	20.3576	22.3422	0.134202	0.3034	0.867152	no
XLOC_001386	Zbtb24	chr10:41450395-41465574	6.65712	6.16994	-0.10964	0.52645	0.939662	no
XLOC_001387	Mical1	chr10:41476313-41487030	6.05145	4.92737	-0.296462	0.08915	0.651485	no
XLOC_001388	Ppil6	chr10:41490438-41514288	1.09944	0.968512	-0.182924	1	1	no
XLOC_001389	Cd164	chr10:41519499-41531042	51.7924	55.7833	0.107092	0.35585	0.887062	no
XLOC_001391	Sesn1	chr10:41810573-41908436	12.1918	13.3167	0.127331	0.363	0.88774	no
XLOC_001392	Snx3	chr10:42502053-42535369	16.718	18.2872	0.129426	0.4437	0.916649	no
XLOC_001393	Ostm1	chr10:42678915-42702462	8.64889	7.37409	-0.230051	0.15275	0.74214	no
XLOC_001394	Sec63	chr10:42761495-42832514	47.4147	45.5829	-0.0568423	0.6095	0.960579	no
XLOC_001395	Scml4	chr10:42860511-42960782	1.13772	1.07886	-0.0766336	1	1	no
XLOC_001396	9030612E09Rik	chr10:43174703-43176562	2.72721	2.56745	-0.0870924	0.7717	0.980416	no
XLOC_001397	Pdss2	chr10:43221485-43464882	8.01142	6.3133	-0.343663	0.0922	0.657371	no
XLOC_001398	Bend3	chr10:43479139-43515417	26.4121	27.796	0.0736799	0.518	0.936467	no
XLOC_001399	Cd24a	chr10:43579168-43584265	106.043	102.274	-0.0522032	0.6412	0.96688	no
XLOC_001402	Rtn4ip1	chr10:43901806-43947862	8.1294	7.21611	-0.171927	0.2952	0.858832	no
XLOC_001404	Atg5	chr10:44268357-44364291	5.68431	4.71424	-0.26996	0.1763	0.767049	no
XLOC_001405	Mir1929	chr10:44268357-44364291	54.8978	104.299	0.925907	0.70215	0.968828	no
XLOC_001406	Prep	chr10:45067213-45158995	18.8242	20.1035	0.0948525	0.4693	0.922463	no
XLOC_001409	Hace1	chr10:45577828-45712345	5.99971	6.32812	0.0768851	0.636	0.965444	no
XLOC_001412	Ascc3	chr10:50592668-50851202	19.629	17.6102	-0.156575	0.1702	0.759608	no
XLOC_001418	Dcbld1	chr10:52233618-52321377	6.60704	6.0834	-0.119126	0.4892	0.92715	no
XLOC_001420	Nus1	chr10:52417546-52440192	10.501	10.815	0.0425059	0.7457	0.976839	no
XLOC_001421	Slc35f1	chr10:52690500-53111622	50.3597	56.8447	0.174755	0.1162	0.703661	no
XLOC_001422	Gm19395	chr10:53278080-53379851	5.99864	2.7111	-1.14576	0.13645	0.722638	no
XLOC_001423	Pln	chr10:53278080-53379851	4.31658	3.98827	-0.114123	0.76945	0.980084	no
XLOC_001424	Asf1a	chr10:53537323-53630439	31.3879	28.4821	-0.140154	0.38575	0.899859	no
XLOC_001426	Msl3l2	chr10:56014293-56228689	3.38391	2.89219	-0.226531	0.57465	0.948094	no
XLOC_001427	Gja1	chr10:56377299-56390419	17.9934	22.5419	0.325138	0.0113	0.30016	no
XLOC_001428	Hsf2	chr10:57486384-57513143	29.8099	31.0225	0.0575229	0.63285	0.964508	no
XLOC_001430	Fabp7	chr10:57784922-57788450	202.022	208.035	0.0423085	0.71515	0.974233	no
XLOC_001431	Smpdl3a	chr10:57794543-57811830	5.5838	4.05834	-0.460358	0.0485	0.532697	no
XLOC_001432	Gcc2	chr10:58255525-58305592	14.3116	14.6198	0.0307435	0.79225	0.98136	no
XLOC_001433	Lims1	chr10:58323465-58424691	20.7003	20.2028	-0.0350982	0.77675	0.980857	no
XLOC_001434	Ranbp2	chr10:58446851-58494154	30.6539	28.5322	-0.10348	0.35255	0.885506	no
XLOC_001435	Ccdc138	chr10:58497936-58576244	11.4114	10.3581	-0.139709	0.36245	0.88774	no
XLOC_001437	Sh3rf3	chr10:58813358-59138916	15.9968	16.791	0.0699071	0.56105	0.944482	no
XLOC_001438	Sowahc	chr10:59221921-59226433	7.81733	7.75469	-0.0116064	0.9365	0.995122	no
XLOC_001439	P4ha1	chr10:59323295-59373304	8.15545	7.72356	-0.0784988	0.58815	0.954185	no
XLOC_001441	Micu1	chr10:59702634-59864122	6.83211	6.208	-0.138201	0.45765	0.91979	no
XLOC_001442	Dnajb12	chr10:59879590-59898016	7.26393	7.06947	-0.0391478	0.8465	0.987325	no
XLOC_001443	Ascc1	chr10:59987908-60099990	4.43901	5.11541	0.204613	0.61705	0.963887	no
XLOC_001444	Spock2	chr10:60106256-60133913	1.54086	2.42612	0.654921	0.0095	0.276853	no
XLOC_001445	Psap	chr10:60277627-60302600	31.3324	37.6284	0.264168	0.0328	0.458558	no
XLOC_001449	Pcbd1	chr10:61089342-61094329	1.81891	1.77084	-0.038637	1	1	no
XLOC_001452	Nodal	chr10:61417971-61425337	1.1739	1.46349	0.3181	1	1	no
XLOC_001453	Lrrc20	chr10:61475832-61582228	8.56572	7.44939	-0.201453	0.2289	0.806404	no
XLOC_001455	Ppa1	chr10:61648620-61674165	19.6138	24.6589	0.330245	0.03875	0.49542	no
XLOC_001456	Sar1a	chr10:61680320-61693297	25.8647	29.5644	0.192874	0.12045	0.7113	no
XLOC_001457	Tysnd1	chr10:61695513-61702773	4.95437	5.40159	0.124682	0.57325	0.94718	no
XLOC_001458	Aifm2	chr10:61715262-61783864	1.58823	1.6764	0.0779461	1	1	no
XLOC_001459	Mir5108	chr10:61715262-61783864	98.0006	0	#NAME?	1	1	no
XLOC_001462	2210417K05Rik	chr10:62268854-62379908	1.44334	0.848755	-0.765986	1	1	no
XLOC_001463	4930507D05Rik	chr10:62429377-62451353	2.00187	1.98558	-0.0117874	1	1	no
XLOC_001464	Slc25a16	chr10:62920632-62946494	5.56945	6.77071	0.281772	0.10105	0.671375	no
XLOC_001465	Dna2	chr10:62947028-62974188	14.3651	13.8284	-0.0549354	0.66065	0.96726	no
XLOC_001466	Rufy2	chr10:62980222-63023849	25.3014	20.6505	-0.293043	0.11045	0.690066	no
XLOC_001467	Pbld2	chr10:63024511-63058812	1.75732	1.57384	-0.159084	1	1	no
XLOC_001468	Pbld1	chr10:63061616-63077536	7.58013	7.64522	0.0123358	0.95	0.995122	no
XLOC_001470	Herc4	chr10:63243796-63317881	13.5096	11.9608	-0.175666	0.18315	0.769935	no
XLOC_001473	Jmjd1c	chr10:67127257-67256326	67.2917	66.4533	-0.0180883	0.8749	0.991523	no
XLOC_001474	Egr2	chr10:67537868-67542188	2.62428	3.52295	0.424863	0.0664	0.585653	no
XLOC_001475	Rtkn2	chr10:67979597-68043864	12.1804	10.8168	-0.171293	0.20205	0.786576	no
XLOC_001477	Rhobtb1	chr10:69208551-69291784	2.50419	2.68115	0.0985081	0.62585	0.964014	no
XLOC_001478	Ank3	chr10:69533707-70027436	4.99423	5.19366	0.0564867	0.6646	0.96726	no
XLOC_001479	Ccdc6	chr10:70097120-70193200	24.1099	24.6804	0.0337369	0.77085	0.980416	no
XLOC_001482	Fam13c	chr10:70440667-70599291	3.57788	2.8605	-0.32284	0.25855	0.830706	no
XLOC_001483	Ipmk	chr10:71347792-71385885	13.2241	13.8132	0.0628755	0.6039	0.959318	no
XLOC_001484	Zwint	chr10:72654894-72669789	32.4352	27.7188	-0.226696	0.06015	0.562681	no
XLOC_001485	Pcdh15	chr10:73821866-74649732	0.771515	1.31975	0.774495	1	1	no
XLOC_001486	Gnaz	chr10:74957476-75032586	3.13306	3.34793	0.0956944	0.69555	0.968066	no
XLOC_001487	Rab36	chr10:75037088-75054100	7.14759	6.03451	-0.24422	0.17275	0.761907	no
XLOC_001488	Bcr	chr10:75060895-75184923	14.5497	14.5178	-0.00317382	0.9795	0.995455	no
XLOC_001489	Specc1l	chr10:75212072-75312400	22.7967	22.5037	-0.0186576	0.8685	0.989895	no
XLOC_001494	Snrpd3	chr10:75518041-75535440	19.3902	20.6898	0.0935919	0.6743	0.96726	no
XLOC_001497	Derl3	chr10:75893397-75895941	3.52195	3.80442	0.111303	0.71545	0.974233	no
XLOC_001501	Zfp280b	chr10:76032611-76042969	22.1786	19.9123	-0.155507	0.18875	0.77668	no
XLOC_001503	S100b	chr10:76253835-76261319	1.10592	1.06425	-0.055407	1	1	no
XLOC_001504	1700094J05Rik	chr10:76351253-76442912	15.8911	15.2397	-0.0603819	0.8874	0.992746	no
XLOC_001506	Mcm3ap	chr10:76449080-76515857	14.0307	13.4658	-0.0592818	0.66285	0.96726	no
XLOC_001507	Lss	chr10:76531626-76562226	20.9088	21.157	0.0170222	0.89295	0.993135	no
XLOC_001511	Slc19a1	chr10:77032738-77050432	8.71623	11.3956	0.386698	0.0213	0.38044	no
XLOC_001512	Pofut2	chr10:77259299-77269586	9.43792	9.72547	0.0432987	0.798	0.981734	no
XLOC_001513	Gm17769	chr10:77418375-77420939	0.995725	1.36688	0.457065	1	1	no
XLOC_001515	Pttg1ip	chr10:77581766-77598732	18.3366	19.1824	0.0650539	0.63765	0.965737	no
XLOC_001516	Sumo3	chr10:77606233-77618331	18.7214	18.7772	0.00429724	0.9759	0.995455	no
XLOC_001517	Ube2g2	chr10:77622320-77645990	14.134	16.058	0.184116	0.22395	0.804184	no
XLOC_001518	Mir1930	chr10:77622320-77645990	108.083	0	#NAME?	1	1	no
XLOC_001529	1810043G02Rik	chr10:77978649-77985438	5.30994	6.29648	0.245852	0.27755	0.848701	no
XLOC_001532	Cstb	chr10:78425669-78427622	6.33885	8.89068	0.488073	0.1566	0.745834	no
XLOC_001533	Ilvbl	chr10:78574499-78584502	4.12197	3.92642	-0.0701199	0.7565	0.977517	no
XLOC_001547	Gm16517	chr10:79669409-79676126	8.15659	7.45023	-0.130682	0.6186	0.963979	no
XLOC_001548	Cdc34	chr10:79682194-79688398	11.1834	14.6672	0.391234	0.0453	0.525229	no
XLOC_001550	Bsg	chr10:79697304-80369637	58.7064	85.5253	0.542834	0.47575	0.923995	no
XLOC_001554	Palm	chr10:79697304-80369637	21.487	17.5388	-0.292916	0.79035	0.98136	no
XLOC_001556	Ptbp1	chr10:79697304-80369637	148.678	173.389	0.221816	0.51125	0.93418	no
XLOC_001561	Arid3a	chr10:79697304-80369637	2.25843	1.98242	-0.188063	0.937	0.995122	no
XLOC_001562	Wdr18	chr10:79697304-80369637	7.09878	8.27441	0.221084	0.89	0.992905	no
XLOC_001563	Grin3b	chr10:79697304-80369637	2.33868	2.2378	-0.0636122	1	1	no
XLOC_001564	Cnn2	chr10:79697304-80369637	1.34749	1.95484	0.53678	1	1	no
XLOC_001567	Gpx4	chr10:79697304-80369637	11.5098	15.549	0.433967	0.867	0.989686	no
XLOC_001568	Stk11	chr10:79697304-80369637	49.171	52.3693	0.0909119	0.9147	0.995122	no
XLOC_001569	Atp5d	chr10:79697304-80369637	47.9033	51.0461	0.0916768	0.94055	0.995122	no
XLOC_001570	Midn	chr10:79697304-80369637	111.762	108.428	-0.0436921	0.90305	0.993721	no
XLOC_001571	Cirbp	chr10:79697304-80369637	12.7737	11.9087	-0.101167	0.9637	0.995397	no
XLOC_001572	1600002K03Rik	chr10:79697304-80369637	6.78423	4.83135	-0.489759	0.8366	0.986236	no
XLOC_001573	Efna2	chr10:79697304-80369637	9.19866	11.072	0.267418	0.88125	0.992183	no
XLOC_001574	Mum1	chr10:79697304-80369637	7.8408	9.02514	0.202948	0.87685	0.991619	no
XLOC_001575	Ndufs7	chr10:79697304-80369637	14.4416	17.1327	0.246524	0.92875	0.995122	no
XLOC_001576	Dazap1	chr10:79697304-80369637	36.2855	35.7346	-0.0220703	0.9805	0.995455	no
XLOC_001577	Rps15	chr10:79697304-80369637	389.511	474.137	0.283641	0.6443	0.96688	no
XLOC_001578	Apc2	chr10:79697304-80369637	16.2665	15.6154	-0.05893	0.9204	0.995122	no
XLOC_001579	Reep6	chr10:79697304-80369637	2.73257	4.56988	0.7419	0.8272	0.985547	no
XLOC_001582	Adat3,Scamp4	chr10:80602879-80615783	19.6801	23.9784	0.285	0.0491	0.535645	no
XLOC_001583	Csnk1g2	chr10:80622779-80640771	27.0583	25.0239	-0.112764	0.39095	0.901186	no
XLOC_001584	Izumo4	chr10:80702692-80705382	5.27066	4.12533	-0.353472	0.287	0.856204	no
XLOC_001585	Dot1l	chr10:80755205-80794347	44.1007	44.8261	0.0235351	0.8348	0.986166	no
XLOC_001586	Sf3a2	chr10:80798734-80804922	22.4966	24.6491	0.13183	0.36495	0.888337	no
XLOC_001588	Oaz1	chr10:80826655-80829290	121.3	129.051	0.0893584	0.45905	0.91979	no
XLOC_001589	Mir1982	chr10:80826655-80829290	1262.23	616.345	-1.03417	0.6482	0.966924	no
XLOC_001590	3110056O03Rik	chr10:80855274-80868708	3.09491	3.88545	0.328185	0.1405	0.726972	no
XLOC_001592	Gadd45b	chr10:80930090-80932204	0.900377	1.95109	1.11568	1	1	no
XLOC_001593	Thop1	chr10:81070082-81082360	7.05794	10.0793	0.51407	0.00315	0.163542	no
XLOC_001594	Map2k2	chr10:81105946-81124697	11.2479	11.3756	0.01629	0.91925	0.995122	no
XLOC_001595	Zbtb7a	chr10:81136270-81151657	9.43645	8.05189	-0.228916	0.0922	0.657371	no
XLOC_001596	Eef2	chr10:81176630-81182509	200.751	252.212	0.329231	0.0049	0.194333	no
XLOC_001597	Snord37	chr10:81176630-81182509	0	5316.14	inf	1	1	no
XLOC_001598	Dapk3	chr10:81183006-81193197	5.42788	5.2283	-0.0540477	0.81945	0.985547	no
XLOC_001600	Zfr2	chr10:81233162-81252123	3.98371	3.4738	-0.197597	0.324	0.87327	no
XLOC_001601	Matk	chr10:81257544-81262981	1.85816	2.9101	0.647192	0.049	0.535065	no
XLOC_001603	Pip5k1c	chr10:81292971-81319974	14.9188	15.595	0.0639469	0.6198	0.963979	no
XLOC_001604	2510012J08Rik	chr10:81321102-81326251	6.59995	7.89276	0.258075	0.14615	0.73216	no
XLOC_001606	Mfsd12	chr10:81357569-81365820	1.48181	1.54881	0.063795	1	1	no
XLOC_001607	Dohh	chr10:81384427-81388352	4.06727	4.83453	0.249312	0.3633	0.88774	no
XLOC_001608	2210404O07Rik	chr10:81393063-81395079	2.02553	5.31457	1.39165	0.05005	0.536277	no
XLOC_001609	Aes	chr10:81559559-81566364	25.2408	23.6944	-0.0912072	0.55245	0.942298	no
XLOC_001610	Tle2	chr10:81575286-81590845	1.46817	1.22689	-0.259018	1	1	no
XLOC_001611	BC025920	chr10:81606307-81609836	6.08384	8.3286	0.453093	0.0198	0.373811	no
XLOC_001612	Ankrd24	chr10:81628539-81647612	2.12786	2.15358	0.0173344	1	1	no
XLOC_001617	Zfp873	chr10:82048126-82061586	10.8374	8.29318	-0.386021	0.0184	0.364237	no
XLOC_001618	AU041133	chr10:82128012-82153065	2.61449	2.36397	-0.145316	0.56255	0.944699	no
XLOC_001619	Tdg	chr10:82629837-82690650	36.9989	35.5215	-0.0587866	0.6297	0.964132	no
XLOC_001620	Hcfc2	chr10:82699006-82741392	10.1714	7.71252	-0.399244	0.01895	0.367957	no
XLOC_001622	Txnrd1	chr10:82833950-82897724	24.3135	23.5125	-0.0483284	0.72255	0.975826	no
XLOC_001623	Eid3	chr10:82833950-82897724	15.8582	15.3292	-0.0489417	0.88395	0.992185	no
XLOC_001624	Chst11	chr10:82985496-83195891	3.85445	4.4003	0.191077	0.2427	0.81794	no
XLOC_001625	D10Wsu102e	chr10:83360220-83368835	37.633	39.7783	0.0799836	0.48635	0.927087	no
XLOC_001626	A230046K03Rik	chr10:83543940-83596473	17.0047	14.2174	-0.258279	0.0316	0.454447	no
XLOC_001627	1500009L16Rik	chr10:83722864-83762762	2.37493	1.96004	-0.277005	1	1	no
XLOC_001629	Polr3b	chr10:84622436-84727178	9.97514	9.79569	-0.0261903	0.8452	0.987055	no
XLOC_001630	Rfx4	chr10:84756047-84906538	31.3044	30.585	-0.0335385	0.7737	0.980857	no
XLOC_001631	Ric8b	chr10:84917615-85016447	13.7461	13.1086	-0.0685017	0.61905	0.963979	no
XLOC_001632	AI597468	chr10:85102626-85117747	16.5477	16.2744	-0.0240252	0.8481	0.987663	no
XLOC_001633	Btbd11	chr10:85386813-85660292	0.97255	1.20133	0.304794	1	1	no
XLOC_001634	Pwp1	chr10:85871830-85889103	19.5847	20.5606	0.0701519	0.59535	0.958434	no
XLOC_001636	Fbxo7	chr10:86021928-86048328	9.71296	10.1022	0.0566813	0.74825	0.976839	no
XLOC_001637	4930486F22Rik	chr10:86048745-86498896	2.06813	1.25338	-0.722506	1	1	no
XLOC_001638	Timp3	chr10:86048745-86498896	6.69059	5.89025	-0.183806	0.42525	0.910442	no
XLOC_001639	1810014B01Rik	chr10:86685526-86689954	9.59129	11.7426	0.29195	0.10235	0.672036	no
XLOC_001640	BC030307	chr10:86705810-86776843	3.6231	5.05665	0.480958	0.03755	0.488492	no
XLOC_001641	Nt5dc3	chr10:86779004-86838389	4.42601	4.51196	0.0277461	0.85265	0.987741	no
XLOC_001645	Tyms-ps	chr10:87966670-87968017	1.14546	0.972464	-0.236211	1	1	no
XLOC_001646	Pmch	chr10:88091071-88146941	1.6996	1.3616	-0.319897	1	1	no
XLOC_001647	Nup37	chr10:88146991-88178395	8.65881	10.4369	0.269454	0.1887	0.77668	no
XLOC_001648	Ccdc53	chr10:88201096-88246158	6.73112	6.62385	-0.023176	0.9308	0.995122	no
XLOC_001649	Gnptab	chr10:88379411-88447329	13.8758	14.8613	0.0989836	0.4148	0.90999	no
XLOC_001651	Arl1	chr10:88731413-88743202	5.99006	6.70908	0.163544	0.58735	0.953511	no
XLOC_001653	Uhrf1bp1l	chr10:89744990-89819869	39.0637	38.5107	-0.0205664	0.85595	0.987741	no
XLOC_001654	Anks1b	chr10:89873508-90972984	3.79106	5.02415	0.406278	0.0062	0.219927	no
XLOC_001655	Ikbip	chr10:91083038-91102613	5.84166	6.10859	0.0644612	0.7812	0.980857	no
XLOC_001656	Cdk17	chr10:93160875-93241342	28.8975	25.072	-0.204863	0.09185	0.656926	no
XLOC_001657	Mir1931	chr10:93160875-93241342	1053.77	933.979	-0.174092	0.78105	0.980857	no
XLOC_001659	Lta4h	chr10:93453395-93484896	11.2215	12.9063	0.201812	0.2101	0.793048	no
XLOC_001661	Ccdc38	chr10:93540631-93605245	1.48289	1.27127	-0.22214	1	1	no
XLOC_001663	Ntn4	chr10:93641048-93745972	14.0963	13.5791	-0.0539274	0.7524	0.977136	no
XLOC_001664	Usp44	chr10:93831554-93858087	8.64616	6.98984	-0.306801	0.06555	0.584475	no
XLOC_001665	Fgd6	chr10:94036000-94145339	8.35425	7.76826	-0.104919	0.40005	0.904788	no
XLOC_001666	Nr2c1	chr10:94147930-94197214	9.72806	8.74519	-0.153662	0.27785	0.848784	no
XLOC_001667	Ndufa12	chr10:94199008-94220948	44.6423	48.9599	0.13319	0.45625	0.91979	no
XLOC_001669	Ccdc41	chr10:94688789-94790336	29.955	29.6607	-0.0142455	0.90585	0.993721	no
XLOC_001670	2310039L15Rik	chr10:95336275-95363216	324.537	303.919	-0.0946951	0.41035	0.908407	no
XLOC_001672	Ube2n	chr10:95515161-95545658	32.5213	32.7953	0.0121059	0.9184	0.995122	no
XLOC_001673	Eea1	chr10:95940662-96045518	13.8424	13.8648	0.00233337	0.98325	0.995455	no
XLOC_001674	Btg1	chr10:96617000-96622811	62.5196	56.0389	-0.157881	0.1587	0.748419	no
XLOC_001677	Dcn	chr10:97479499-97518162	1.31332	2.07233	0.658038	0.06485	0.58141	no
XLOC_001678	Lum	chr10:97565500-97572703	0.441973	1.34946	1.61035	1	1	no
XLOC_001682	Atp2b1	chr10:98915151-99026143	16.0959	16.539	0.0391845	0.73305	0.976839	no
XLOC_001683	Poc1b	chr10:99107170-99197988	26.3526	24.4913	-0.105676	0.48185	0.926391	no
XLOC_001684	Galnt4	chr10:99107170-99197988	7.08244	6.081	-0.219939	0.30735	0.867801	no
XLOC_001685	Dusp6	chr10:99263230-99267489	5.66876	7.25481	0.355906	0.0485	0.532697	no
XLOC_001692	Cep290	chr10:100488288-100589259	19.9014	19.3572	-0.0400055	0.73615	0.976839	no
XLOC_001697	Slc6a15	chr10:103367807-103419379	3.67017	4.03876	0.138064	0.46375	0.921148	no
XLOC_001699	Gm15663	chr10:105574550-105583870	3.14576	2.06785	-0.605273	0.01185	0.306223	no
XLOC_001700	Ccdc59	chr10:105841478-105847510	22.5714	24.5363	0.120417	0.4583	0.91979	no
XLOC_001703	Ppp1r12a	chr10:108162399-108277575	50.8967	47.0213	-0.114256	0.3188	0.87327	no
XLOC_001704	Pawr	chr10:108332188-108414391	6.72616	6.19053	-0.11972	0.5717	0.946373	no
XLOC_001706	E2f7	chr10:110745464-110787384	36.5356	36.4451	-0.00357892	0.9749	0.995455	no
XLOC_001707	Csrp2	chr10:110920175-110939514	33.1276	34.3788	0.0534859	0.7429	0.976839	no
XLOC_001708	Osbpl8	chr10:111164801-111297247	9.70066	8.07165	-0.26522	0.03775	0.489422	no
XLOC_001709	Bbs10	chr10:111298678-111301736	4.44344	5.38009	0.275954	0.14785	0.734236	no
XLOC_001710	Nap1l1	chr10:111473191-111498150	136.674	142.97	0.0649793	0.64255	0.96688	no
XLOC_001711	Gm5176	chr10:111500787-111501345	11.0776	8.2198	-0.430471	0.1809	0.768975	no
XLOC_001712	Phlda1	chr10:111506285-111508649	8.18813	9.54096	0.220601	0.2357	0.812706	no
XLOC_001713	Krr1	chr10:111972694-111997264	15.9204	17.1898	0.11068	0.37235	0.892605	no
XLOC_001720	Zfc3h1	chr10:115384958-115432771	41.4905	37.1674	-0.158744	0.15425	0.742863	no
XLOC_001730	Cpm	chr10:117629499-117687352	1.18517	1.35528	0.193502	1	1	no
XLOC_001731	4933411E08Rik	chr10:117925458-117948307	7.05653	5.78604	-0.286383	0.1808	0.768975	no
XLOC_001732	Mdm1	chr10:118141786-118168999	28.0219	25.918	-0.112601	0.3651	0.888337	no
XLOC_001736	1700025F24Rik	chr10:119413443-119426864	1.16274	0.956826	-0.281194	1	1	no
XLOC_001737	Grip1	chr10:119454313-120075593	13.1756	12.9698	-0.0227145	0.87445	0.991523	no
XLOC_001738	Tmbim4	chr10:120208825-120224897	13.2209	11.0366	-0.26053	0.27315	0.846884	no
XLOC_001739	Llph	chr10:120227059-120232070	38.2605	46.843	0.291975	0.02995	0.44386	no
XLOC_001740	9230105E05Rik	chr10:120361274-120476935	14.8673	11.2492	-0.402327	0.30795	0.868281	no
XLOC_001741	4921513I03Rik	chr10:120765731-120778886	1.75106	1.67271	-0.0660405	1	1	no
XLOC_001742	Gm15910	chr10:120781100-120898971	8.99574	7.67917	-0.22829	0.40135	0.905482	no
XLOC_001743	Wif1	chr10:121034003-121100642	0.973589	1.59739	0.714337	1	1	no
XLOC_001744	Gns	chr10:121365089-121397245	16.2953	19.2163	0.237877	0.05905	0.558849	no
XLOC_001746	BC048403	chr10:121739936-121752859	3.80632	4.17506	0.133397	0.50585	0.932809	no
XLOC_001749	Ppm1h	chr10:122678761-122945793	1.2934	1.36656	0.0793797	1	1	no
XLOC_001752	Lrig3	chr10:125966218-126015359	1.24901	1.37723	0.140989	1	1	no
XLOC_001753	Ctdsp2	chr10:126978716-126999975	1369.81	1430.95	0.0630063	0.945	0.995122	no
XLOC_001754	Avil	chr10:127000708-127020994	2.02095	1.69452	-0.254155	1	1	no
XLOC_001755	Mettl1	chr10:127041931-127045461	5.85183	7.93084	0.438585	0.13835	0.72348	no
XLOC_001756	Cyp27b1	chr10:127048245-127053006	1.1295	0.778743	-0.53646	1	1	no
XLOC_001757	Cdk4	chr10:127063602-127067282	162.877	166.632	0.0328795	0.775	0.980857	no
XLOC_001758	LOC100504703	chr10:127070480-127071101	5.27847	4.1346	-0.352372	1	1	no
XLOC_001759	Agap2	chr10:127078906-127093169	1.18322	0.954296	-0.310216	1	1	no
XLOC_001760	B4galnt1	chr10:127165155-127172340	3.01138	2.58383	-0.220911	0.43555	0.915505	no
XLOC_001761	F420014N23Rik	chr10:127190377-127211622	3.12949	2.68738	-0.219728	0.66625	0.96726	no
XLOC_001762	Dctn2	chr10:127266261-127288771	19.2184	16.3739	-0.231084	0.42875	0.913019	no
XLOC_001763	Ddit3	chr10:127290792-127311786	9.86076	10.233	0.0534524	0.908	0.994038	no
XLOC_001765	R3hdm2	chr10:127390310-127499384	41.9032	45.971	0.133664	0.24505	0.819368	no
XLOC_001766	Stac3	chr10:127501716-127508815	0.712159	1.21864	0.775005	1	1	no
XLOC_001770	Tmem194	chr10:127677064-127701047	18.5626	18.7621	0.0154186	0.90515	0.993721	no
XLOC_001771	Myo1a	chr10:127705255-127720940	1.60294	2.22238	0.471386	1	1	no
XLOC_001773	Zbtb39	chr10:127739537-127747339	14.1633	15.3307	0.114262	0.3492	0.883138	no
XLOC_001774	Rdh1	chr10:127759762-127768299	4.98901	4.28166	-0.220582	0.20725	0.791709	no
XLOC_001775	Rdh9	chr10:127776404-127792697	6.26754	6.08626	-0.0423431	0.81395	0.984349	no
XLOC_001777	Rdh18-ps	chr10:127824215-127846565	2.9421	2.43545	-0.272654	0.20765	0.791913	no
XLOC_001781	Prim1	chr10:128015214-128030030	78.2306	63.3321	-0.304795	0.01185	0.306223	no
XLOC_001782	Naca	chr10:128035345-128048637	100.875	113.138	0.16551	0.444	0.916649	no
XLOC_001783	Ptges3	chr10:128058981-128077254	56.0782	52.5966	-0.0924714	0.4375	0.91583	no
XLOC_001784	Atp5b	chr10:128083306-128090388	404.385	460.323	0.186915	0.11535	0.702986	no
XLOC_001785	Mir677	chr10:128083306-128090388	1122.05	952.715	-0.236023	0.7836	0.9813	no
XLOC_001786	Baz2a	chr10:128092782-128129303	25.8923	23.6229	-0.132336	0.24355	0.81794	no
XLOC_001788	Mip	chr10:128225837-128231811	2.13087	1.44707	-0.558308	1	1	no
XLOC_001789	Timeless	chr10:128232062-128252941	22.7477	23.5412	0.0494718	0.6804	0.96726	no
XLOC_001790	Apon	chr10:128254130-128255901	1.25118	1.08926	-0.199931	1	1	no
XLOC_001792	Stat2	chr10:128270575-128292849	7.15298	6.65809	-0.103436	0.4845	0.927087	no
XLOC_001793	Pan2	chr10:128303334-128321358	39.4359	38.5553	-0.0325813	0.7768	0.980857	no
XLOC_001794	Cnpy2	chr10:128322458-128327187	24.0636	30.0247	0.319294	0.0536	0.547602	no
XLOC_001795	Cs	chr10:128337831-128362479	61.0934	62.5798	0.034681	0.7641	0.978818	no
XLOC_001796	Ankrd52	chr10:128377123-128394006	37.5108	36.1499	-0.0533143	0.6297	0.964132	no
XLOC_001797	Rnf41	chr10:128411615-128441441	14.8794	12.2408	-0.28162	0.04345	0.516964	no
XLOC_001798	Smarcc2	chr10:128459235-128490174	127.741	109.897	-0.217064	0.06345	0.576078	no
XLOC_001800	Wibg	chr10:128747878-128766568	9.29658	8.98187	-0.0496835	0.82305	0.985547	no
XLOC_001801	Mmp19	chr10:128790909-128804370	1.61457	1.49343	-0.112515	1	1	no
XLOC_001802	Dnajc14	chr10:128805675-128821631	6.88781	6.3468	-0.118016	0.51135	0.93418	no
XLOC_001803	Sarnp	chr10:128821770-128877638	30.1037	35.8503	0.252047	0.0887	0.64986	no
XLOC_001804	Cd63	chr10:128908918-128912818	12.4386	13.921	0.162445	0.455	0.91979	no
XLOC_001833	B020014A21Rik	chr10:3125090-3133193	3.10038	3.33583	0.105601	0.6888	0.967298	no
XLOC_001835	Zbtb2	chr10:4367073-4388108	16.5171	16.3754	-0.0124354	0.9228	0.995122	no
XLOC_001836	Rmnd1	chr10:4403168-4432352	11.9262	12.4681	0.0641066	0.69355	0.967987	no
XLOC_001837	Syne1	chr10:5020195-5194707	8.2331	6.58538	-0.322168	0.0223	0.386511	no
XLOC_001839	Fbxo5	chr10:5799157-5805465	27.4423	29.0832	0.0837884	0.52325	0.938472	no
XLOC_001840	Mtrf1l	chr10:5811886-5823943	9.38931	7.76987	-0.273129	0.10035	0.669393	no
XLOC_001841	Rgs17	chr10:5825663-5922400	1.11808	0.902711	-0.308685	1	1	no
XLOC_001843	Cnksr3	chr10:7119061-7212237	5.74569	4.68795	-0.293523	0.09955	0.669393	no
XLOC_001845	Pcmt1	chr10:7630235-7664623	14.7192	17.0214	0.209646	0.1911	0.77668	no
XLOC_001846	BC020402	chr10:7678970-7681158	5.65309	5.60955	-0.011155	0.94255	0.995122	no
XLOC_001847	BC013529	chr10:7767946-7780917	9.45204	10.8679	0.201378	0.2792	0.848978	no
XLOC_001848	Tab2	chr10:7905647-7956123	71.7355	76.0557	0.0843683	0.44835	0.918477	no
XLOC_001849	Ust	chr10:8204752-8518825	2.29364	2.1846	-0.0702685	1	1	no
XLOC_001850	Sash1	chr10:8722218-8886070	7.68836	7.78014	0.0171199	0.89485	0.993389	no
XLOC_001851	Samd5	chr10:9627258-9675208	2.77537	2.42648	-0.193818	0.4586	0.91979	no
XLOC_001852	Stxbp5	chr10:9755546-9901040	13.1958	12.403	-0.0893908	0.4467	0.918261	no
XLOC_001856	Utrn	chr10:12382187-12861735	14.6617	12.9361	-0.180647	0.1095	0.687581	no
XLOC_001857	B230208H11Rik	chr10:12916645-12923127	11.6186	10.0316	-0.211885	0.325	0.87327	no
XLOC_001860	Ltv1	chr10:13178637-13193137	19.0808	19.2051	0.00936624	0.951	0.995122	no
XLOC_001861	Phactr2	chr10:13207716-13474396	16.8884	14.4109	-0.228874	0.0476	0.52991	no
XLOC_001862	Pex3	chr10:13523841-13563376	9.95049	9.86936	-0.0118118	0.95375	0.995122	no
XLOC_001863	Aig1	chr10:13652708-13868830	4.22714	4.21339	-0.00469891	0.9607	0.995347	no
XLOC_001865	Vta1	chr10:14655332-14705489	8.62978	9.68622	0.166611	0.4162	0.90999	no
XLOC_001866	Gje1	chr10:14705608-14759019	8.65228	7.4605	-0.213808	0.29545	0.85934	no
XLOC_001868	Heca	chr10:17900465-17948067	9.56646	9.81292	0.0366967	0.7943	0.981416	no
XLOC_001869	3110003A17Rik	chr10:18011259-18023252	10.31	11.585	0.168207	0.49515	0.928823	no
XLOC_001872	Hebp2	chr10:18540122-18546076	0.870688	1.16734	0.423002	1	1	no
XLOC_001873	D10Bwg1379e	chr10:18588010-18743758	0.837574	1.50041	0.841064	1	1	no
XLOC_001874	Gm4922	chr10:18779726-18786793	1.06484	0.894804	-0.250998	1	1	no
XLOC_001878	Pex7	chr10:19860089-19907674	5.15201	5.3566	0.056183	0.79315	0.98136	no
XLOC_001881	Myb	chr10:21124929-21160984	16.3165	14.4704	-0.173226	0.17615	0.76698	no
XLOC_001882	4930455C13Rik	chr10:21295978-21368889	16.443	14.8064	-0.151254	0.6968	0.968182	no
XLOC_001884	E030030I06Rik	chr10:22113049-22149270	44.8251	42.7353	-0.0688784	0.57605	0.948841	no
XLOC_001885	Tbpl1	chr10:22645010-22731447	29.0313	29.7391	0.0347516	0.77955	0.980857	no
XLOC_001887	Eya4	chr10:23104167-23349903	8.07477	8.50218	0.074413	0.6067	0.959934	no
XLOC_001889	Snora33	chr10:23785182-23787209	511.368	500.53	-0.0309061	0.95805	0.995122	no
XLOC_001890	Snord100	chr10:23785182-23787209	5250.39	5334.19	0.0228459	0.96595	0.995455	no
XLOC_001898	Arg1	chr10:24915206-24927470	3.54511	2.67505	-0.406267	0.18265	0.768975	no
XLOC_001899	Akap7	chr10:25169089-25299163	2.14511	2.0231	-0.0844865	1	1	no
XLOC_001904	L3mbtl3	chr10:26275451-26375185	17.7478	16.8996	-0.0706505	0.57845	0.949972	no
XLOC_001905	Gm8709	chr10:26673445-26674651	1.37302	1.42644	0.0550648	1	1	no
XLOC_001907	4930519F09Rik	chr10:28921962-28923507	26.7712	22.3444	-0.260769	0.06715	0.589537	no
XLOC_001909	Rnf146	chr10:29313165-29362442	21.0848	19.3955	-0.120481	0.3247	0.87327	no
XLOC_001911	Cenpw	chr10:30196008-30200540	5.67803	6.1564	0.116696	0.5999	0.959266	no
XLOC_001912	Trmt11	chr10:30534224-30600749	4.19806	4.42182	0.0749177	0.72565	0.976061	no
XLOC_001913	Gm20300	chr10:30603194-30606634	21.1577	19.2512	-0.136234	0.2715	0.844749	no
XLOC_001914	Hint3	chr10:30608206-30618366	3.89422	3.64838	-0.0940764	0.82855	0.985547	no
XLOC_001915	Ncoa7	chr10:30645581-30803107	5.44494	3.86628	-0.493971	0.0024	0.139151	no
XLOC_001916	Hey2	chr10:30832358-30842783	4.30769	6.11338	0.505055	0.0103	0.284177	no
XLOC_001919	Rnf217	chr10:31501886-31609725	9.06885	8.98681	-0.0131107	0.9407	0.995122	no
XLOC_001920	Nkain2	chr10:31689318-32889915	3.71003	2.61541	-0.504393	0.16015	0.750342	no
XLOC_001921	D830005E20Rik	chr10:33083482-33476709	18.4618	15.9606	-0.210023	0.15495	0.743005	no
XLOC_001924	Zufsp	chr10:33926935-33951212	22.784	19.871	-0.197356	0.13635	0.722638	no
XLOC_001925	A830082N09Rik	chr10:33987215-33995055	2.76676	3.29922	0.253925	0.1046	0.673358	no
XLOC_001926	Rwdd1	chr10:33996554-34019616	13.0009	12.7911	-0.0234701	0.9084	0.994038	no
XLOC_001931	Nt5dc1	chr10:34303611-34418528	3.96527	3.26249	-0.281445	0.24115	0.816896	no
XLOC_001932	Marcks	chr10:37133242-37138926	105.71	97.9937	-0.109348	0.33085	0.87327	no
XLOC_001934	1700025K23Rik	chr10:39118807-39133895	1.62237	1.42907	-0.183032	1	1	no
XLOC_001935	Wisp3	chr10:39134022-39163794	7.60917	5.98545	-0.34628	0.30405	0.867315	no
XLOC_001936	E130307A14Rik	chr10:39612933-39732007	10.8453	9.32219	-0.218325	0.32905	0.87327	no
XLOC_001937	AA474331	chr10:39892759-39899238	2.53665	2.74993	0.116472	1	1	no
XLOC_001939	BC021785,G630090E17Rik	chr10:39946911-39986646	1.92348	1.72084	-0.160603	1	1	no
XLOC_001941	Slc16a10	chr10:40033534-40142254	18.3737	17.005	-0.111681	0.4335	0.91456	no
XLOC_001942	Rpf2	chr10:40223245-40247039	8.96813	11.5627	0.3666	0.04835	0.532697	no
XLOC_001943	Gtf3c6	chr10:40249202-40257665	39.5519	35.6144	-0.151287	0.29515	0.858832	no
XLOC_001944	Amd1	chr10:40287457-40302188	36.1198	35.6217	-0.0200355	0.86675	0.989686	no
XLOC_001945	Cdc40	chr10:40831621-40883143	25.3924	24.8858	-0.0290775	0.81595	0.984657	no
XLOC_001947	Fig4	chr10:41188171-41303241	4.59442	3.89813	-0.237102	0.2147	0.797497	no
XLOC_001948	Smpd2	chr10:41487171-41490340	23.8856	23.4912	-0.0240178	0.86435	0.989274	no
XLOC_001949	Ccdc162	chr10:41538848-41587753	1.73369	1.89328	0.127045	1	1	no
XLOC_001950	Cep57l1	chr10:41718839-41809868	8.62585	10.0257	0.216961	0.1928	0.777179	no
XLOC_001952	Foxo3	chr10:42185785-42276742	11.6181	13.1577	0.179537	0.2239	0.804184	no
XLOC_001953	Lace1	chr10:42312584-42478565	1.53837	1.47101	-0.0645885	1	1	no
XLOC_001954	Nr2e1	chr10:42561970-42583588	153.788	139.059	-0.145247	0.19835	0.782699	no
XLOC_001955	Sobp	chr10:43002499-43174530	8.5346	7.47675	-0.190912	0.16935	0.759608	no
XLOC_001956	1700021F05Rik	chr10:43525120-43540994	12.0315	11.4725	-0.0686404	0.7608	0.97812	no
XLOC_001957	Qrsl1	chr10:43874189-43901736	7.87817	6.90872	-0.189442	0.31555	0.87327	no
XLOC_001960	Lin28b	chr10:45376618-45470201	2.77253	3.3411	0.26912	0.1281	0.71541	no
XLOC_001961	C130030K03Rik	chr10:49093680-49095843	1.29204	1.31631	0.0268505	1	1	no
XLOC_001962	Grik2	chr10:49099462-49788754	39.1909	37.9078	-0.0480237	0.6642	0.96726	no
XLOC_001967	Gopc	chr10:52337023-52382124	4.50332	4.40951	-0.0303719	0.85235	0.987741	no
XLOC_001969	Gm9766	chr10:53278080-53379851	10.0648	9.18582	-0.131834	0.49435	0.927721	no
XLOC_001970	Gm20597	chr10:53498442-53518989	3.02163	2.84612	-0.0863323	0.62555	0.964014	no
XLOC_001971	Mcm9	chr10:53537323-53630439	14.8805	12.3243	-0.271911	0.1298	0.715924	no
XLOC_001972	Fam184a	chr10:53633144-53750909	8.28947	7.34774	-0.17398	0.23345	0.810403	no
XLOC_001974	D630037F22Rik	chr10:56014293-56228689	4.82739	4.58041	-0.0757671	0.60895	0.960296	no
XLOC_001976	Serinc1	chr10:57515774-57532529	24.4999	25.9657	0.083832	0.4997	0.931004	no
XLOC_001980	2017-09-10	chr10:59141626-59221847	11.3549	12.0187	0.0819639	0.6458	0.96688	no
XLOC_001982	Ccdc109a	chr10:59446983-59616692	3.76466	2.91806	-0.367512	0.1008	0.670943	no
XLOC_001983	Ddit4	chr10:59949674-59951770	7.42211	10.2828	0.470332	0.0157	0.337078	no
XLOC_001984	Anapc16	chr10:59987908-60099990	32.7743	27.3685	-0.260047	0.0866	0.648638	no
XLOC_001985	Chst3	chr10:60181527-60219260	18.9772	19.8694	0.0662791	0.56795	0.945455	no
XLOC_001987	Slc29a3	chr10:60712071-60752782	5.81654	5.50945	-0.0782516	0.603	0.959308	no
XLOC_001988	Unc5b	chr10:60762594-60831581	1.74859	2.13042	0.284948	1	1	no
XLOC_001990	Sgpl1	chr10:61098641-61147665	10.8575	10.999	0.0186747	0.89225	0.993082	no
XLOC_001991	Adamts14	chr10:61197111-61273438	6.94716	6.76009	-0.0393816	0.78565	0.98136	no
XLOC_001992	X99384	chr10:61319656-61383523	1.82747	2.1929	0.262993	1	1	no
XLOC_001993	Eif4ebp2	chr10:61432496-61452669	127.564	133.595	0.0666429	0.55295	0.942298	no
XLOC_001994	H2afy2	chr10:61715262-61783864	51.276	55.2507	0.107709	0.3781	0.896343	no
XLOC_001996	2010107G23Rik	chr10:62107655-62111013	0.7723	1.30172	0.753188	1	1	no
XLOC_001997	Tspan15	chr10:62185395-62231218	5.91737	4.86291	-0.283134	0.0963	0.66542	no
XLOC_001998	Hk1	chr10:62268854-62379908	2.09498	2.47629	0.241243	0.2888	0.85665	no
XLOC_002000	Supv3l1	chr10:62429377-62451353	13.8375	12.7001	-0.123741	0.42335	0.90999	no
XLOC_002001	Vps26a	chr10:62454842-62486805	24.5794	24.356	-0.0131745	0.9166	0.995122	no
XLOC_002003	2510003E04Rik	chr10:62558469-62578457	20.4007	23.0005	0.173045	0.18605	0.771628	no
XLOC_002004	Ddx21	chr10:62580246-62602298	19.0462	22.51	0.241064	0.04305	0.514887	no
XLOC_002005	Ddx50	chr10:62616022-62651198	30.1264	30.2567	0.00622947	0.9555	0.995122	no
XLOC_002007	Ccar1	chr10:62743927-62792368	75.0341	72.8221	-0.0431706	0.70405	0.970043	no
XLOC_002009	Tet1	chr10:62804569-62880014	24.6248	23.5552	-0.064071	0.569	0.945529	no
XLOC_002010	Hnrnph3	chr10:62980222-63023849	121.875	119.273	-0.0311375	0.85365	0.987741	no
XLOC_002012	Sirt1	chr10:63319004-63339035	17.3104	16.4469	-0.0738228	0.5501	0.942298	no
XLOC_002015	Reep3	chr10:67009188-67096988	23.9435	25.5245	0.0922448	0.42275	0.90999	no
XLOC_002016	Nrbf2	chr10:67266688-67285281	4.8599	5.96081	0.294579	0.1915	0.77668	no
XLOC_002017	Ado	chr10:67544510-67548955	4.98711	5.3473	0.100605	0.53485	0.939662	no
XLOC_002018	Zfp365	chr10:67886104-67912662	1.63379	1.62382	-0.00883386	1	1	no
XLOC_002019	Arid5b	chr10:68095592-68278726	5.0455	4.04545	-0.318696	0.0627	0.57247	no
XLOC_002022	Cdk1	chr10:69336634-69352912	16.4008	20.3498	0.311251	0.01805	0.360432	no
XLOC_002023	Phyhipl	chr10:70440667-70599291	7.33818	7.4913	0.0297949	0.87815	0.991619	no
XLOC_002024	D630013N20Rik	chr10:70601048-70655963	1.70822	1.29302	-0.401752	1	1	no
XLOC_002025	Bicc1	chr10:70925095-71159634	2.37701	3.34641	0.493464	0.0335	0.46493	no
XLOC_002027	Tfam	chr10:71225476-71238044	8.84133	8.81118	-0.00492759	0.97175	0.995455	no
XLOC_002028	Ube2d1	chr10:71254979-71285262	57.5714	66.1493	0.200373	0.10535	0.675636	no
XLOC_002029	Cisd1	chr10:71330493-71344849	6.23968	7.06021	0.178239	0.52465	0.938536	no
XLOC_002033	1110038D17Rik	chr10:75506813-75517322	5.90864	6.3037	0.0933735	0.5943	0.957823	no
XLOC_002034	AI646023	chr10:75550124-75560330	5.30014	5.21811	-0.0225026	0.88965	0.992905	no
XLOC_002035	Susd2	chr10:75636618-75644008	1.78897	1.84048	0.0409544	1	1	no
XLOC_002036	Cabin1	chr10:75646109-75764357	18.7729	19.6553	0.066264	0.56775	0.945455	no
XLOC_002037	Ddt	chr10:75771232-75773374	6.16384	4.65763	-0.404231	0.32725	0.87327	no
XLOC_002043	Smarcb1	chr10:75896768-75921614	28.1759	31.1917	0.146704	0.27815	0.848978	no
XLOC_002044	Mmp11	chr10:75923223-75932463	7.03715	7.5423	0.100013	0.58655	0.953105	no
XLOC_002046	Prmt2	chr10:76207221-76237865	16.5435	203.576	3.62123	0.3205	0.87327	no
XLOC_002047	Dip2a	chr10:76263048-76345291	6.80946	6.56129	-0.0535613	0.689	0.967298	no
XLOC_002048	Pcnt	chr10:76351253-76442912	17.9991	16.6921	-0.10876	0.3613	0.88774	no
XLOC_002049	Ybey	chr10:76449080-76515857	6.67488	7.14558	0.0983099	0.6709	0.96726	no
XLOC_002050	4930483K19Rik	chr10:76531626-76562226	1.78436	1.62921	-0.131233	1	1	no
XLOC_002053	Pcbp3	chr10:76761853-76961947	12.3312	15.5724	0.336677	0.0279	0.43064	no
XLOC_002054	Col18a1	chr10:77052178-77166530	11.8557	12.7202	0.101548	0.43175	0.913231	no
XLOC_002055	Gm10941	chr10:77257772-77259223	4.41653	7.61416	0.785771	0.03495	0.474672	no
XLOC_002056	Adarb1	chr10:77290726-77418273	5.36799	5.78701	0.108437	0.43815	0.915848	no
XLOC_002057	1810008A18Rik	chr10:77486654-77515813	4.5513	4.62524	0.0232514	0.90705	0.993796	no
XLOC_002062	Lrrc3	chr10:77897575-77902536	6.92776	6.85749	-0.0147087	0.9247	0.995122	no
XLOC_002064	Pfkl	chr10:77986948-78009796	10.1138	10.0435	-0.010065	0.9388	0.995122	no
XLOC_002066	D10Jhu81e	chr10:78162066-78169768	2.17295	1.73866	-0.321682	1	1	no
XLOC_002067	Pwp2	chr10:78170909-78185149	5.491	6.75375	0.29862	0.0677	0.592074	no
XLOC_002068	Trappc10	chr10:78186725-78244642	11.3119	11.2174	-0.0121017	0.92625	0.995122	no
XLOC_002069	Agpat3	chr10:78271562-78351700	11.9908	10.9566	-0.13013	0.34995	0.883893	no
XLOC_002070	Rrp1	chr10:78400361-78413043	66.1641	70.2139	0.0857075	0.46	0.91979	no
XLOC_002071	Pdxk	chr10:78436746-78464948	5.39385	6.25418	0.213506	0.15665	0.745834	no
XLOC_002072	Syde1	chr10:78584502-78591964	12.8539	12.0051	-0.0985619	0.48075	0.92615	no
XLOC_002077	2610008E11Rik	chr10:79064373-79097600	16.4425	14.5808	-0.173365	0.16915	0.759608	no
XLOC_002078	Ppap2c	chr10:79526428-79533787	2.76522	3.1318	0.179601	0.54125	0.940656	no
XLOC_002079	Mier2	chr10:79540244-79555091	8.54815	8.43001	-0.0200785	0.9073	0.993894	no
XLOC_002082	Shc2	chr10:79617937-79637918	5.04445	6.01081	0.252863	0.1304	0.715924	no
XLOC_002085	Polrmt	chr10:79697304-80369637	6.52275	6.49843	-0.00538976	0.99705	0.998011	no
XLOC_002086	Rnf126	chr10:79697304-80369637	28.2551	28.69	0.0220357	0.9854	0.995455	no
XLOC_002088	E130317F20Rik	chr10:79697304-80369637	3.57114	2.93162	-0.284686	0.90565	0.993721	no
XLOC_002089	BC005764	chr10:79697304-80369637	56.7396	57.0153	0.00699288	0.9901	0.995455	no
XLOC_002090	Med16	chr10:79697304-80369637	12.1383	14.3683	0.243326	0.83545	0.986236	no
XLOC_002091	C030046I01Rik	chr10:79697304-80369637	96.7295	107.179	0.147997	0.7868	0.98136	no
XLOC_002092	ORF61	chr10:79697304-80369637	20.2367	21.4972	0.087176	0.9387	0.995122	no
XLOC_002093	Polr2e	chr10:79697304-80369637	21.8892	26.9407	0.299569	0.8623	0.98883	no
XLOC_002094	Sbno2	chr10:79697304-80369637	3.15802	3.46868	0.135364	0.94465	0.995122	no
XLOC_002095	Dos	chr10:79697304-80369637	10.8227	11.9109	0.138228	0.91425	0.995122	no
XLOC_002096	Gamt	chr10:79697304-80369637	1.24633	1.0282	-0.277567	1	1	no
XLOC_002097	2310011J03Rik	chr10:79697304-80369637	2.22894	3.15805	0.502676	0.88835	0.992905	no
XLOC_002098	Pcsk4	chr10:79697304-80369637	2.08448	3.52555	0.758163	0.8246	0.985547	no
XLOC_002100	Mex3d	chr10:80380354-80387651	20.2793	20.687	0.0287192	0.8205	0.985547	no
XLOC_002101	Mbd3	chr10:80392540-80399479	18.0125	20.8251	0.209325	0.17445	0.76534	no
XLOC_002102	Uqcr11	chr10:80402996-80406821	17.8092	14.3141	-0.315192	0.33485	0.873585	no
XLOC_002103	Tcf3	chr10:80409164-80433653	69.9242	71.0324	0.0226858	0.84245	0.986897	no
XLOC_002105	Rexo1	chr10:80540925-80561560	19.8813	19.1589	-0.0534045	0.6569	0.96726	no
XLOC_002106	Klf16	chr10:80567120-80577296	1.78088	1.64528	-0.114257	1	1	no
XLOC_002107	Fam108a	chr10:80583648-80590341	4.7644	5.86431	0.299667	0.26705	0.841215	no
XLOC_002108	Btbd2	chr10:80642616-80657071	8.29906	10.19	0.296128	0.0639	0.576955	no
XLOC_002109	Mknk2	chr10:80665329-80671976	6.2255	6.81873	0.131315	0.44905	0.918477	no
XLOC_002110	Mob3a	chr10:80685252-80701820	3.86668	5.64487	0.545844	0.00745	0.237692	no
XLOC_002111	Ap3d1	chr10:80706977-80742211	22.5726	22.1661	-0.0262199	0.8227	0.985547	no
XLOC_002112	Plekhj1	chr10:80796098-80798626	7.35368	8.51317	0.211229	0.36785	0.890017	no
XLOC_002114	Lingo3	chr10:80832800-80844039	0.951839	1.23055	0.370517	1	1	no
XLOC_002115	Lsm7	chr10:80852824-80855209	21.1463	31.3491	0.568018	0.02325	0.395181	no
XLOC_002116	Timm13	chr10:80879815-80900969	2.07403	3.49715	0.753742	0.08445	0.645641	no
XLOC_002117	Lmnb2	chr10:80901362-80918245	17.2256	21.698	0.333002	0.0086	0.262194	no
XLOC_002118	Gng7	chr10:80948623-81014925	1.69139	1.85305	0.131691	1	1	no
XLOC_002120	Slc39a3	chr10:81028539-81033912	3.92909	4.44873	0.1792	0.34565	0.879682	no
XLOC_002121	Sgta	chr10:81044072-81060154	16.132	18.239	0.177107	0.2282	0.805221	no
XLOC_002123	Pias4	chr10:81153965-81167720	8.64009	10.1387	0.230755	0.2257	0.804184	no
XLOC_002124	Itgb1bp3	chr10:81194690-81230779	11.4764	9.43906	-0.281957	0.1925	0.777179	no
XLOC_002125	Atcay	chr10:81194690-81230779	4.6029	3.77529	-0.285955	0.22305	0.804184	no
XLOC_002126	Mrpl54	chr10:81264721-81266926	8.64507	9.26162	0.099388	0.7681	0.980022	no
XLOC_002129	Hmg20b	chr10:81346045-81350457	25.1515	25.543	0.0222847	0.87755	0.991619	no
XLOC_002130	4930404N11Rik	chr10:81357569-81365820	3.88343	1.86569	-1.05763	0.11475	0.70127	no
XLOC_002131	Fzr1	chr10:81366878-81378370	14.1055	13.1509	-0.101099	0.5174	0.936271	no
XLOC_002132	Nfic	chr10:81396190-81427173	10.788	11.3056	0.0676136	0.5961	0.958612	no
XLOC_002133	Celf5	chr10:81459227-81482709	5.65319	5.65447	0.000327334	0.98735	0.995455	no
XLOC_002134	Ncln	chr10:81486458-81496363	13.6418	15.785	0.210517	0.12975	0.715924	no
XLOC_002135	S1pr4	chr10:81497744-81500137	4.90493	4.43174	-0.14636	0.4969	0.928996	no
XLOC_002137	Gna11	chr10:81528731-81545046	23.8903	23.6401	-0.0151895	0.90285	0.993721	no
XLOC_002139	Sirt6	chr10:81621785-81627608	22.493	26.467	0.234723	0.0996	0.669393	no
XLOC_002142	Zfp938	chr10:82224855-82241275	4.33003	3.76621	-0.201263	0.38315	0.898715	no
XLOC_002144	1190007I07Rik	chr10:82619850-82623228	10.8194	8.68483	-0.317056	0.3335	0.87327	no
XLOC_002145	Glt8d2	chr10:82629837-82690650	1.88455	2.0846	0.145551	1	1	no
XLOC_002146	Nfyb	chr10:82748699-82764141	21.2894	19.2394	-0.146071	0.26675	0.840734	no
XLOC_002147	Slc41a2	chr10:83231138-83337817	1.00013	1.01123	0.0159331	1	1	no
XLOC_002148	Aldh1l2	chr10:83487446-83534140	3.77792	3.38556	-0.158198	0.3322	0.87327	no
XLOC_002149	Appl2	chr10:83600033-83648664	26.4724	26.4605	-0.000645088	0.9955	0.997246	no
XLOC_002150	Nuak1	chr10:84371318-84440471	3.01681	3.20622	0.0878511	0.63465	0.965444	no
XLOC_002151	Ckap4	chr10:84526304-84533888	20.6555	27.2984	0.402287	0.00145	0.104822	no
XLOC_002154	Mterfd3	chr10:85119432-85128027	4.09123	4.71635	0.205137	0.42365	0.90999	no
XLOC_002155	Cry1	chr10:85131699-85185054	5.52206	6.74992	0.289662	0.1027	0.672036	no
XLOC_002156	Prdm4	chr10:85891967-85916945	21.8796	22.3618	0.0314503	0.78985	0.98136	no
XLOC_002157	D10Wsu52e	chr10:85938636-85957793	16.6435	19.1773	0.204442	0.1571	0.746111	no
XLOC_002159	Syn3	chr10:86048745-86498896	8.78127	9.81159	0.160057	0.3015	0.864391	no
XLOC_002160	Hsp90b1	chr10:86690840-86705444	225.376	282.676	0.326813	0.0058	0.213478	no
XLOC_002162	Ascl1	chr10:87491040-87493660	34.2326	29.9699	-0.191854	0.13285	0.716775	no
XLOC_002163	4930547N16Rik	chr10:88091071-88146941	17.1681	17.5358	0.0305751	0.81355	0.984349	no
XLOC_002165	Chpt1	chr10:88459586-88503970	3.7333	3.50449	-0.0912463	0.7534	0.977279	no
XLOC_002168	Gm4925	chr10:88729540-88731101	1.46329	0.994864	-0.556645	1	1	no
XLOC_002169	Utp20	chr10:88746606-88826814	17.0649	18.3664	0.106033	0.34875	0.882713	no
XLOC_002171	Gas2l3	chr10:89408822-89443967	25.3298	25.1129	-0.0124058	0.91495	0.995122	no
XLOC_002173	Slc17a8	chr10:89574019-89621249	1.88519	1.95037	0.0490353	1	1	no
XLOC_002174	Scyl2	chr10:89640106-89686285	21.014	21.2713	0.0175573	0.8888	0.992905	no
XLOC_002175	Actr6	chr10:89711972-89732295	5.56326	5.70678	0.0367475	0.86465	0.989274	no
XLOC_002176	Apaf1	chr10:90989310-91082743	9.53799	7.73107	-0.303017	0.01765	0.354927	no
XLOC_002177	Slc25a3	chr10:91116577-91123963	95.8029	116.436	0.281394	0.0155	0.337078	no
XLOC_002178	Tmpo	chr10:91147570-91171582	187.144	173.091	-0.112615	0.3368	0.874035	no
XLOC_002179	Mir135a-2	chr10:92072085-92072185	128.181	47.3343	-1.43723	0.313	0.871474	no
XLOC_002180	Rmst	chr10:92081745-92165178	34.9923	41.0912	0.231791	0.05185	0.54383	no
XLOC_002181	Mir1251	chr10:92081745-92165178	104.254	209.798	1.00889	1	1	no
XLOC_002183	Nedd1	chr10:92684744-92722418	12.365	12.3452	-0.00230717	0.9918	0.995548	no
XLOC_002185	Elk3	chr10:93247415-93311159	11.7117	9.05391	-0.371335	0.0058	0.213478	no
XLOC_002187	Snrpf	chr10:93540631-93605245	19.8262	23.512	0.245987	0.24505	0.819368	no
XLOC_002188	Gm8580	chr10:93641048-93745972	12.4815	13.0413	0.0632907	0.89235	0.993082	no
XLOC_002189	Gm15915	chr10:93641048-93745972	8.16213	8.75611	0.101346	0.7972	0.981734	no
XLOC_002190	Metap2	chr10:93858489-93891202	27.9428	28.417	0.0242777	0.8361	0.986236	no
XLOC_002192	Vezt	chr10:93968099-94035748	11.5868	11.2059	-0.0482185	0.71455	0.974233	no
XLOC_002194	4932415G12Rik	chr10:94673492-94688613	2.57064	2.70502	0.0735118	0.7175	0.974933	no
XLOC_002195	Plxnc1	chr10:94790865-94944578	9.39169	8.25189	-0.186661	0.1435	0.729048	no
XLOC_002196	Cradd	chr10:95174745-95324097	4.09834	4.06147	-0.0130383	0.97215	0.995455	no
XLOC_002197	Socs2	chr10:95411489-95416857	22.1473	19.3768	-0.192802	0.15065	0.738221	no
XLOC_002198	Mrpl42	chr10:95480805-95501927	38.231	40.5147	0.0836996	0.62235	0.964014	no
XLOC_002199	Nudt4	chr10:95547006-95564167	37.6387	35.9989	-0.0642633	0.5801	0.950632	no
XLOC_002200	Mir3058	chr10:95547006-95564167	406.276	140.495	-1.53194	0.5748	0.948179	no
XLOC_002207	Tmtc3	chr10:100443901-100487347	23.8166	23.8769	0.00364857	0.97705	0.995455	no
XLOC_002208	4930430F08Rik	chr10:100488288-100589259	4.41494	4.99697	0.178661	0.73265	0.976839	no
XLOC_002212	Tmtc2	chr10:105187663-105574479	2.65775	3.18697	0.261979	0.145	0.730565	no
XLOC_002213	BC067068	chr10:105763184-105841380	9.35759	10.0243	0.0992901	0.5586	0.94359	no
XLOC_002223	Zdhhc17	chr10:110941779-111010066	34.7883	31.6797	-0.135044	0.24055	0.816896	no
XLOC_002226	Glipr1	chr10:111972694-111997264	5.4286	4.2701	-0.346311	0.54915	0.942298	no
XLOC_002227	Atxn7l3b	chr10:112925427-112929026	43.5334	46.6422	0.0995151	0.38435	0.899231	no
XLOC_002230	Tbc1d15	chr10:115197870-115251493	9.23596	9.17425	-0.00967094	0.9406	0.995122	no
XLOC_002231	Rab21	chr10:115289861-115315591	16.8026	15.9182	-0.0780104	0.6103	0.961231	no
XLOC_002232	Tmem19	chr10:115340739-115362262	2.59511	3.64775	0.491212	0.0301	0.444764	no
XLOC_002233	Thap2	chr10:115369965-115384435	16.6452	14.9439	-0.155549	0.2277	0.8047	no
XLOC_002236	Kcnmb4	chr10:116417867-116473523	1.58713	1.49864	-0.0827669	1	1	no
XLOC_002237	Cnot2	chr10:116485160-116581511	57.4754	52.5554	-0.129107	0.38515	0.899859	no
XLOC_002240	Rab3ip	chr10:116905783-116950380	9.60039	9.98757	0.0570412	0.71945	0.975133	no
XLOC_002241	Cct2	chr10:117050997-117063814	85.5871	102.262	0.25681	0.0244	0.404632	no
XLOC_002242	Frs2	chr10:117070126-117148474	30.4972	26.0995	-0.224656	0.0484	0.532697	no
XLOC_002243	Yeats4	chr10:117215140-117224507	30.528	32.3983	0.0857826	0.53655	0.939662	no
XLOC_002247	Cpsf6	chr10:117344667-117376973	50.9828	46.8468	-0.12206	0.27285	0.846493	no
XLOC_002248	Mdm2	chr10:117688904-117710716	56.1284	58.0378	0.0482609	0.67295	0.96726	no
XLOC_002249	Slc35e3	chr10:117733677-117746358	8.33066	9.28341	0.156225	0.2961	0.860062	no
XLOC_002250	Nup107	chr10:117750642-117792705	25.9616	27.5476	0.0855495	0.47685	0.92438	no
XLOC_002251	Rap1b	chr10:117814596-117845974	12.7118	11.2716	-0.173474	0.28525	0.854629	no
XLOC_002254	Cand1	chr10:119198811-119240055	29.82	31.7797	0.0918252	0.4074	0.907309	no
XLOC_002255	4930564G21Rik	chr10:119454313-120075593	5.15613	5.88343	0.190369	0.75095	0.976839	no
XLOC_002256	Helb	chr10:120083607-120112965	5.70617	4.86133	-0.231173	0.15035	0.738221	no
XLOC_002258	Hmga2	chr10:120361274-120476935	71.419	66.2387	-0.108633	0.35035	0.883893	no
XLOC_002259	Msrb3	chr10:120781100-120898971	14.2656	12.0805	-0.239861	0.1749	0.765992	no
XLOC_002260	Lemd3	chr10:120923410-120979330	14.3962	14.7476	0.0347909	0.7788	0.980857	no
XLOC_002263	Tbk1	chr10:121546455-121586794	25.1169	24.8489	-0.0154731	0.89765	0.993721	no
XLOC_002264	Xpot	chr10:121587379-121626316	19.8283	20.669	0.0599043	0.6081	0.959934	no
XLOC_002265	Srgap1	chr10:121780990-122047315	4.65679	4.72337	0.0204799	0.887	0.992746	no
XLOC_002267	Tmem5	chr10:122081259-122097102	7.96444	8.29101	0.0579744	0.7809	0.980857	no
XLOC_002268	A130077B15Rik	chr10:122565022-122569891	462.822	429.009	-0.109449	0.39315	0.902081	no
XLOC_002270	Mon2	chr10:122992060-123076505	12.9538	12.3008	-0.0746231	0.52085	0.938472	no
XLOC_002271	Usp15	chr10:123113243-123196923	24.5568	24.4297	-0.00748783	0.95075	0.995122	no
XLOC_002272	Slc16a7	chr10:125227484-125328535	2.76463	2.93549	0.0865127	0.721	0.975511	no
XLOC_002273	Xrcc6bp1	chr10:126868427-126901371	4.65185	5.23573	0.170587	0.58695	0.953105	no
XLOC_002274	Tsfm	chr10:127022331-127030814	8.74495	8.10139	-0.11028	0.6369	0.965579	no
XLOC_002276	2017-03-09	chr10:127056049-127060184	2.36364	3.00518	0.346441	0.25015	0.822752	no
XLOC_002277	Tspan31	chr10:127067289-127070261	45.0452	48.5381	0.107742	0.39005	0.901186	no
XLOC_002278	Os9	chr10:127094258-127121160	11.2696	13.8007	0.292313	0.0267	0.421808	no
XLOC_002280	Arhgef25	chr10:127182520-127190054	11.5228	13.3937	0.217063	0.16055	0.750342	no
XLOC_002281	Dtx3	chr10:127190377-127211622	52.4778	47.3394	-0.148665	0.30385	0.867315	no
XLOC_002282	Pip4k2c	chr10:127190377-127211622	8.30801	8.73479	0.0722694	0.7907	0.98136	no
XLOC_002283	Kif5a	chr10:127225694-127263363	3.4202	3.1101	-0.13712	0.42335	0.90999	no
XLOC_002284	Mbd6	chr10:127266261-127288771	33.3116	30.6496	-0.120158	0.3696	0.891123	no
XLOC_002285	Mars	chr10:127290792-127311786	23.6732	27.378	0.209762	0.1009	0.671217	no
XLOC_002287	Inhbe	chr10:127349401-127351772	1.08003	1.59064	0.558537	1	1	no
XLOC_002288	Inhbc	chr10:127356325-127370544	0.506869	1.00289	0.984475	1	1	no
XLOC_002289	Shmt2	chr10:127514938-127522444	40.241	50.3595	0.323595	0.00665	0.228784	no
XLOC_002290	Nxph4	chr10:127525472-127534559	0.837173	2.17122	1.37491	1	1	no
XLOC_002291	Lrp1	chr10:127538157-127621148	19.3605	17.7303	-0.1269	0.256	0.82795	no
XLOC_002292	Nab2	chr10:127642985-127666703	1.76738	2.24092	0.34248	1	1	no
XLOC_002293	Gpr182	chr10:127749601-127751798	1.46098	1.85448	0.344073	1	1	no
XLOC_002296	Rbms2	chr10:128129469-128180297	18.5532	16.8743	-0.136842	0.2504	0.822752	no
XLOC_002297	Spryd4	chr10:128194634-128211794	3.3141	4.10303	0.308074	0.29245	0.857015	no
XLOC_002299	Coq10a	chr10:128363096-128370037	4.92447	5.52781	0.16674	0.3952	0.902909	no
XLOC_002301	Obfc2b	chr10:128401394-128409796	46.7271	57.4052	0.296922	0.0266	0.421808	no
XLOC_002302	Myl6	chr10:128490860-128493825	201.829	191.977	-0.0722023	0.551	0.942298	no
XLOC_002303	Myl6b	chr10:128494156-128498685	6.59864	5.58594	-0.24037	0.38995	0.901186	no
XLOC_002304	Esyt1	chr10:128510249-128525859	2.71596	2.19285	-0.308657	0.17605	0.766912	no
XLOC_002305	Zc3h10	chr10:128543564-128547744	5.2152	7.18353	0.46197	0.0243	0.40401	no
XLOC_002306	Rpl41	chr10:128548109-128549168	585.602	746.428	0.350081	0.00285	0.15355	no
XLOC_002307	Pa2g4	chr10:128557765-128565934	85.4797	100.349	0.231367	0.04165	0.507712	no
XLOC_002310	Ikzf4	chr10:128632414-128645993	6.56747	5.98045	-0.135082	0.4103	0.908407	no
XLOC_002311	Suox	chr10:128669886-128673918	2.18077	1.80627	-0.271826	1	1	no
XLOC_002312	Rab5b	chr10:128677182-128696268	14.5476	16.316	0.165509	0.2114	0.794019	no
XLOC_002313	Cdk2	chr10:128697938-128705051	18.6448	17.2547	-0.111789	0.4217	0.90999	no
XLOC_002314	Dgka	chr10:128706257-128744056	2.4713	2.28584	-0.112546	0.6632	0.96726	no
XLOC_002315	Tmem198b	chr10:128790909-128804370	8.96442	8.91197	-0.0084656	0.96525	0.995455	no
XLOC_002316	Ormdl2	chr10:128805675-128821631	10.995	10.4059	-0.0794472	0.7002	0.968438	no
XLOC_002317	Gdf11	chr10:128884545-128891718	11.6747	13.7398	0.234978	0.16245	0.752824	no
XLOC_002318	Rdh5	chr10:128913590-128919297	1.97315	2.30471	0.22408	1	1	no
XLOC_002319	Bloc1s1	chr10:128919913-128923524	23.1968	20.2504	-0.195978	0.4131	0.909623	no
XLOC_002353	Neurod4	chr10:130268151-130280240	2.64239	2.69627	0.0291257	0.8911	0.992951	no
XLOC_002358	Pisd-ps1	chr11:3124020-3193463	38.0139	52.7103	0.471557	0.01345	0.323978	no
XLOC_002359	Eif4enif1	chr11:3202352-3479831	51.026	51.2647	0.00673194	0.9728	0.995455	no
XLOC_002360	Patz1	chr11:3202352-3479831	104.031	115.589	0.151993	0.4918	0.927519	no
XLOC_002361	Pik3ip1	chr11:3202352-3479831	7.10932	8.70422	0.292004	0.6731	0.96726	no
XLOC_002362	8430429K09Rik	chr11:3202352-3479831	10.9694	11.2412	0.0353119	0.9594	0.995122	no
XLOC_002363	Pla2g3	chr11:3488226-3494166	0.836497	1.04044	0.314765	1	1	no
XLOC_002364	Selm	chr11:3514701-3517351	0.85339	1.52101	0.833756	1	1	no
XLOC_002365	Morc2a	chr11:3649493-3690372	44.1198	41.6467	-0.0832238	0.4569	0.91979	no
XLOC_002366	Dusp18	chr11:3895239-3901296	8.77854	9.62832	0.133303	0.32725	0.87327	no
XLOC_002371	Rnf215	chr11:4135159-4160293	5.89526	5.74337	-0.0376557	0.9	0.993721	no
XLOC_002373	Sf3a1	chr11:4160353-4182541	36.1245	38.7279	0.100397	0.3734	0.892769	no
XLOC_002374	Tbc1d10a	chr11:4186832-4215505	3.6657	2.84739	-0.36445	0.18595	0.771628	no
XLOC_002378	Ascc2	chr11:4637792-4683386	40.5215	37.609	-0.107608	0.36665	0.890017	no
XLOC_002379	Zmat5	chr11:4704677-4737666	5.87174	6.76084	0.203415	0.52445	0.938472	no
XLOC_002380	Nipsnap1	chr11:4874002-4894200	19.5276	18.7516	-0.0584998	0.68895	0.967298	no
XLOC_002381	Thoc5	chr11:4895342-4928865	15.0518	13.8457	-0.120504	0.41055	0.908407	no
XLOC_002382	Ap1b1	chr11:4938755-5042794	8.28076	8.01098	-0.0477832	0.7477	0.976839	no
XLOC_002383	Rasl10a	chr11:5054130-5065327	0.873113	2.05506	1.23494	1	1	no
XLOC_002384	Rhbdd3	chr11:5099437-5106091	9.85564	8.28657	-0.250174	0.1791	0.768975	no
XLOC_002386	Xbp1	chr11:5520966-5525872	26.1931	31.0486	0.245343	0.0684	0.595476	no
XLOC_002388	2210015D19Rik	chr11:5713416-5784710	2.60501	2.72398	0.0644281	0.8901	0.992905	no
XLOC_002389	Dbnl	chr11:5788482-5800980	21.049	19.9567	-0.076877	0.56725	0.945455	no
XLOC_002390	Aebp1	chr11:5861865-5878256	1.65789	1.86542	0.170152	1	1	no
XLOC_002391	Ykt6	chr11:5955757-5967781	12.1592	13.4065	0.140889	0.3441	0.879451	no
XLOC_002392	Ogdh	chr11:6291596-6359094	26.3812	25.2613	-0.0625838	0.57965	0.950167	no
XLOC_002393	Zmiz2	chr11:6389363-6406162	50.0749	51.2839	0.0344176	0.76265	0.978488	no
XLOC_002394	Ppia	chr11:6415869-6419810	442.291	554.524	0.326252	0.00335	0.168563	no
XLOC_002395	Ccm2	chr11:6546886-6596761	15.5394	14.3569	-0.114185	0.4801	0.925988	no
XLOC_002397	Adcy1	chr11:7063488-7178505	1.08523	1.16949	0.107879	1	1	no
XLOC_002404	Ikzf1	chr11:11686212-11772926	1.53045	2.20287	0.525427	0.0174	0.354545	no
XLOC_002407	Vstm2a	chr11:16257723-16284551	1.70276	1.57574	-0.111848	1	1	no
XLOC_002409	Fbxo48	chr11:16951409-16954772	3.62185	4.15328	0.197526	0.40485	0.906705	no
XLOC_002410	Cnrip1	chr11:17051933-17079372	1.96959	3.61801	0.877298	0.00905	0.269275	no
XLOC_002411	Ppp3r1	chr11:17159297-17200380	9.57239	10.6957	0.160087	0.2936	0.857015	no
XLOC_002412	Wdr92	chr11:17211892-17235200	8.99116	7.86152	-0.193699	0.19605	0.779423	no
XLOC_002413	C1d	chr11:17257617-17269176	3.04297	3.08009	0.0174898	0.9375	0.995122	no
XLOC_002415	Spred2	chr11:19924441-20022597	21.2464	19.7008	-0.10896	0.39765	0.904289	no
XLOC_002416	Rab1	chr11:20201601-20226856	45.2821	49.8947	0.139948	0.235	0.812646	no
XLOC_002417	Sertad2	chr11:20543252-20653023	16.5208	15.9739	-0.0485644	0.6864	0.96726	no
XLOC_002418	Peli1	chr11:21091323-21150327	31.877	32.2791	0.0180822	0.8771	0.991619	no
XLOC_002419	Vps54	chr11:21238888-21321133	26.7268	25.3043	-0.0789078	0.5033	0.931853	no
XLOC_002420	Wdpcp	chr11:21572280-21898686	4.92696	4.84525	-0.0241271	0.90645	0.993796	no
XLOC_002421	Tmem17	chr11:22512282-22519231	3.40725	3.17279	-0.102855	0.7422	0.976839	no
XLOC_002422	Zrsr1	chr11:22899727-22982284	7.91838	7.64867	-0.0499959	0.7359	0.976839	no
XLOC_002423	Cct4	chr11:22990592-23003336	37.5914	44.695	0.249711	0.0402	0.502918	no
XLOC_002425	Xpo1	chr11:23256040-23297597	57.2641	56.0438	-0.0310774	0.7815	0.980857	no
XLOC_002426	Usp34	chr11:23306894-23497946	37.3548	35.9119	-0.0568333	0.658	0.96726	no
XLOC_002427	Pus10	chr11:23646478-23732876	19.1482	19.0395	-0.00821288	0.96385	0.995397	no
XLOC_002428	Bcl11a	chr11:24078055-24173558	93.1787	87.6478	-0.0882825	0.5296	0.939662	no
XLOC_002431	Fancl	chr11:26387083-26593920	8.57954	6.72142	-0.352133	0.122	0.7113	no
XLOC_002432	Gm12070	chr11:26785107-26787859	1.62069	2.10199	0.375155	1	1	no
XLOC_002438	Pnpt1	chr11:29130750-29161828	19.8722	19.8411	-0.00225738	0.98135	0.995455	no
XLOC_002439	Smek2	chr11:29172906-29220797	26.7209	24.7804	-0.108771	0.34385	0.879451	no
XLOC_002440	Ccdc88a	chr11:29373774-29510811	48.8576	43.9298	-0.153381	0.17255	0.76154	no
XLOC_002441	Mtif2	chr11:29526456-29545255	24.9381	22.7299	-0.133762	0.2902	0.85665	no
XLOC_002443	Rtn4	chr11:29692897-30026033	62.7575	61.1864	-0.0365781	0.75315	0.977279	no
XLOC_002444	Psme4	chr11:30771774-30880361	44.2898	39.5276	-0.164114	0.14155	0.727626	no
XLOC_002445	Gpr75	chr11:30885357-30893725	1.27952	1.37942	0.108456	1	1	no
XLOC_002446	Asb3	chr11:30954397-31102704	7.53574	7.57722	0.00792039	0.96625	0.995455	no
XLOC_002447	Cpeb4	chr11:31872210-31931577	16.8877	15.9185	-0.0852669	0.54235	0.940875	no
XLOC_002449	Nsg2	chr11:32000458-32059202	10.7745	14.3787	0.416305	0.00825	0.256064	no
XLOC_002450	Snrnp25	chr11:32205414-32208995	6.26562	6.19849	-0.0155404	0.96275	0.995397	no
XLOC_002451	Mpg	chr11:32226504-32267614	8.06091	8.59747	0.0929687	0.693	0.967987	no
XLOC_002457	Sh3pxd2b	chr11:32347810-32428183	19.5824	18.3538	-0.093484	0.4204	0.90999	no
XLOC_002458	Ubtd2	chr11:32455371-32518709	18.3163	18.865	0.0425817	0.7411	0.976839	no
XLOC_002459	Stk10	chr11:32533265-32624595	2.40276	2.35727	-0.0275733	0.8901	0.992905	no
XLOC_002460	Fbxw11	chr11:32642874-32746814	24.7559	23.9788	-0.0460111	0.70295	0.969436	no
XLOC_002466	Pank3	chr11:35769494-35791285	31.204	29.3388	-0.0889169	0.42975	0.913019	no
XLOC_002468	Nudcd2	chr11:40733641-40740046	8.85039	11.4829	0.375669	0.04285	0.51411	no
XLOC_002471	Slu7	chr11:43433730-43447981	10.2244	11.5315	0.17356	0.20955	0.793048	no
XLOC_002473	Ccnjl	chr11:43528783-43586997	9.26351	8.76067	-0.0805183	0.62305	0.964014	no
XLOC_002474	Pwwp2a	chr11:43681997-43722633	34.1425	33.5807	-0.0239347	0.84155	0.986897	no
XLOC_002476	Rnf145	chr11:44518963-44565520	33.9516	35.2371	0.0536166	0.6457	0.96688	no
XLOC_002479	Clint1	chr11:45851963-45910625	33.7643	35.7572	0.0827335	0.4861	0.927087	no
XLOC_002481	Adam19	chr11:46055986-46147342	2.97158	3.53861	0.251949	0.1343	0.718955	no
XLOC_002482	C030019I05Rik	chr11:46193848-46312859	5.7055	4.27415	-0.416716	0.33225	0.87327	no
XLOC_002484	Med7	chr11:46436946-46442721	16.1029	12.4427	-0.372022	0.012	0.308703	no
XLOC_002485	Havcr2	chr11:46454930-46481254	1.26558	0.881512	-0.521749	1	1	no
XLOC_002491	Gnb2l1	chr11:48800359-48806241	89.5315	114.027	0.348912	0.00325	0.167214	no
XLOC_002492	Snord96a	chr11:48800359-48806241	1078.01	591.007	-0.867124	0.71255	0.973478	no
XLOC_002493	Snord95	chr11:48800359-48806241	7377.48	5639.9	-0.387458	0.7293	0.9766	no
XLOC_002498	Zfp62	chr11:49203499-49218816	39.2351	33.9899	-0.20704	0.07405	0.612454	no
XLOC_002499	Mgat1	chr11:49244190-49263024	3.89018	3.62136	-0.103307	0.64865	0.967141	no
XLOC_002517	Gfpt2	chr11:49794154-49838620	4.54944	4.54402	-0.00172271	0.9816	0.995455	no
XLOC_002518	Mapk9	chr11:49846750-49886421	14.6309	15.5873	0.0913497	0.45895	0.91979	no
XLOC_002520	Rnf130	chr11:50025330-50104733	31.627	29.5694	-0.0970519	0.48175	0.926355	no
XLOC_002521	Mir340	chr11:50025330-50104733	411.31	88.8761	-2.21036	0.2558	0.82795	no
XLOC_002522	Tbc1d9b	chr11:50131359-50172785	10.996	11.4903	0.0634428	0.62215	0.964014	no
XLOC_002523	3010026O09Rik	chr11:50174850-50200115	14.2642	13.7995	-0.0477803	0.80715	0.984069	no
XLOC_002524	Mgat4b	chr11:50225334-50235103	4.71951	5.46681	0.212063	0.3067	0.867315	no
XLOC_002525	Hnrnph1	chr11:50377718-50386528	421.424	388.963	-0.115639	0.33795	0.874634	no
XLOC_002532	Zfp354a	chr11:51059256-51072799	2.0063	2.18263	0.121527	1	1	no
XLOC_002534	Clk4	chr11:51263170-51281764	77.167	74.7053	-0.0467739	0.68495	0.96726	no
XLOC_002535	Col23a1	chr11:51289919-51583925	1.85907	1.26614	-0.554145	1	1	no
XLOC_002536	Agxt2l2	chr11:51584756-51606881	50.0131	42.2673	-0.242764	0.48725	0.927087	no
XLOC_002537	Nhp2	chr11:51619772-51635896	8.14304	12.1777	0.580603	0.07395	0.61207	no
XLOC_002538	D930048N14Rik	chr11:51643088-51657681	1.61689	1.36851	-0.240621	1	1	no
XLOC_002539	Sar1b	chr11:51763662-51791953	18.7663	22.8624	0.284833	0.0768	0.621694	no
XLOC_002540	Cdkn2aipnl	chr11:51967630-51977336	8.53212	12.0423	0.49713	0.00585	0.213478	no
XLOC_002541	Cdkl3	chr11:52004220-52084667	9.35581	8.68096	-0.108007	0.524	0.938472	no
XLOC_002542	Ppp2ca	chr11:52098823-52122749	55.1286	61.8845	0.16678	0.16655	0.757981	no
XLOC_002543	Mir3061	chr11:52126745-52126836	72.5741	0	#NAME?	1	1	no
XLOC_002544	Skp1a	chr11:52231994-52246858	39.78	45.037	0.179067	0.1676	0.759203	no
XLOC_002545	Vdac1	chr11:52361114-52389396	29.5686	33.8588	0.195463	0.13095	0.715924	no
XLOC_002546	9530068E07Rik	chr11:52396427-52408723	29.4786	35.569	0.270952	0.0287	0.433613	no
XLOC_002548	Zcchc10	chr11:53324688-53333301	5.92748	8.56015	0.530219	0.02455	0.404632	no
XLOC_002549	Aff4	chr11:53350766-53421830	39.8046	39.5237	-0.0102168	0.9265	0.995122	no
XLOC_002552	2017-09-08	chr11:53519735-53544096	15.0345	14.3212	-0.0701299	0.5833	0.951534	no
XLOC_002553	Kif3a	chr11:53567378-53604244	18.0737	16.6706	-0.116585	0.3261	0.87327	no
XLOC_002556	P4ha2	chr11:54100923-54131667	2.88776	1.94485	-0.570293	0.04625	0.527783	no
XLOC_002557	Acsl6	chr11:54303823-54361539	11.8994	10.0406	-0.245045	0.11135	0.692346	no
XLOC_002559	Fnip1	chr11:54438178-54518241	10.5151	10.01	-0.0710184	0.56785	0.945455	no
XLOC_002560	Rapgef6	chr11:54522844-54699286	29.3838	29.0449	-0.0167343	0.8881	0.992746	no
XLOC_002562	Hint1	chr11:54866437-54870496	50.279	50.7573	0.0136602	0.93305	0.995122	no
XLOC_002563	Gpx3	chr11:54902853-54910382	3.31892	2.8281	-0.230885	0.4479	0.918477	no
XLOC_002564	Gm2a	chr11:55097984-55113028	2.20414	2.55042	0.210519	0.3177	0.87327	no
XLOC_002565	Slc36a1	chr11:55204339-55236330	3.9805	3.92176	-0.0214497	0.89905	0.993721	no
XLOC_002566	G3bp1	chr11:55469751-55500887	36.9058	37.339	0.0168347	0.88695	0.992746	no
XLOC_002567	Gm12238	chr11:55469751-55500887	218.198	136.496	-0.67678	0.67215	0.96726	no
XLOC_002569	Mfap3	chr11:57518664-57533817	21.4247	23.8052	0.152001	0.18915	0.77668	no
XLOC_002570	Galnt10	chr11:57645441-57787500	1.78035	2.53045	0.507228	0.0216	0.38044	no
XLOC_002571	Sap30l	chr11:57801636-57810615	4.65179	4.89256	0.0728015	0.7808	0.980857	no
XLOC_002572	Larp1	chr11:58009063-58062032	46.9229	52.5385	0.163083	0.1446	0.729515	no
XLOC_002573	Cnot8	chr11:58104152-58118594	11.8842	11.6147	-0.0330949	0.836	0.986236	no
XLOC_002574	Mrpl22	chr11:58171653-58179581	12.1153	11.6935	-0.0511235	0.83585	0.986236	no
XLOC_002578	Zfp692	chr11:58307068-58314613	30.9804	29.5347	-0.068941	0.60095	0.959266	no
XLOC_002579	Sh3bp5l	chr11:58330717-58347728	3.72214	3.96145	0.0898974	0.65985	0.96726	no
XLOC_002582	Gm12253	chr11:58432558-58441622	4.38732	4.3915	0.00137483	0.971	0.995455	no
XLOC_002595	2810021J22Rik	chr11:58867239-58884338	6.17676	5.71126	-0.11304	0.4516	0.919501	no
XLOC_002597	Hist3h2ba	chr11:58948910-58949530	9.52059	10.083	0.0828021	0.79165	0.98136	no
XLOC_002598	Hist3h2a	chr11:58954684-58956674	21.3446	17.7205	-0.268451	0.0617	0.568337	no
XLOC_002599	Trim17	chr11:58963780-58971729	7.81401	7.8958	0.0150229	0.9418	0.995122	no
XLOC_002600	Trim11	chr11:58978115-58991458	11.92	13.3788	0.166572	0.29265	0.857015	no
XLOC_002601	Mrpl55	chr11:59202516-59206002	12.068	12.6605	0.0691435	0.77835	0.980857	no
XLOC_002602	2310033P09Rik	chr11:59208360-59210734	15.4332	18.1469	0.233686	0.1826	0.768975	no
XLOC_002604	Jmjd4	chr11:59450044-59458567	8.10794	8.06656	-0.00738119	0.9581	0.995122	no
XLOC_002605	4933439C10Rik	chr11:59485520-59511067	8.12269	9.24654	0.186957	0.62365	0.964014	no
XLOC_002608	Mprip	chr11:59662494-59780860	21.1422	20.9191	-0.0153019	0.89945	0.993721	no
XLOC_002609	Gm16062	chr11:59810079-59839767	4.29608	4.79136	0.157416	0.83075	0.985547	no
XLOC_002610	Nt5m	chr11:59848072-59876533	8.39678	10.2841	0.292509	0.1639	0.754487	no
XLOC_002611	Med9	chr11:59948213-59964942	4.31132	4.22141	-0.0304034	0.8743	0.991523	no
XLOC_002612	Rai1	chr11:60105012-60220604	46.0476	44.7226	-0.0421207	0.7485	0.976839	no
XLOC_002613	Lrrc48	chr11:60353379-60394333	1.10443	1.17038	0.0836687	1	1	no
XLOC_002614	4933439F18Rik	chr11:60417144-60445277	13.7178	15.8161	0.205345	0.10365	0.67232	no
XLOC_002615	Drg2	chr11:60454616-60468705	15.4387	16.2725	0.0758857	0.6319	0.964489	no
XLOC_002617	Alkbh5	chr11:60537682-60558512	10.6556	10.5748	-0.010989	0.93025	0.995122	no
XLOC_002618	Llgl1	chr11:60699689-60727221	26.5182	28.5686	0.107452	0.4575	0.91979	no
XLOC_002619	Smcr7	chr11:60728397-60732951	3.91859	2.47793	-0.661202	0.0062	0.219927	no
XLOC_002621	Smcr8	chr11:60777524-60788287	22.7492	21.1045	-0.108262	0.39	0.901186	no
XLOC_002622	Dhrs7b	chr11:60830630-60858423	5.6512	5.22496	-0.113137	0.62545	0.964014	no
XLOC_002623	Map2k3	chr11:60932056-60952803	5.34205	5.40685	0.0173945	0.9411	0.995122	no
XLOC_002627	Mfap4	chr11:61485443-61488704	32.1934	43.4982	0.434192	0.0014	0.102505	no
XLOC_002628	B9d1	chr11:61505171-61512927	12.9125	10.049	-0.361722	0.1547	0.743005	no
XLOC_002631	Specc1	chr11:62077096-62223013	22.1809	20.2598	-0.130694	0.2453	0.819383	no
XLOC_002633	Ttc19	chr11:62281472-62457332	22.4337	22.2563	-0.0114531	0.97935	0.995455	no
XLOC_002634	Pigl	chr11:62458459-62513900	27.4832	25.7251	-0.0953719	0.4837	0.926889	no
XLOC_002635	Ubb	chr11:62551503-62553212	33.117	43.9474	0.408207	0.021	0.379528	no
XLOC_002640	Snord65	chr11:62602876-62604806	9455.72	6641.2	-0.509742	0.73025	0.976839	no
XLOC_002641	Mmgt2	chr11:62648663-62666359	2.6032	2.60814	0.00273457	0.96355	0.995397	no
XLOC_002644	Fam18b	chr11:62879489-62895184	4.34602	3.74406	-0.215092	0.398	0.904289	no
XLOC_002647	Pmp22	chr11:63131509-63159546	2.87662	2.39841	-0.262294	0.3724	0.892605	no
XLOC_002648	2810001G20Rik	chr11:64079483-64083259	7.18707	5.47408	-0.392787	0.17955	0.768975	no
XLOC_002649	Hs3st3a1	chr11:64433134-64522835	1.32678	1.47212	0.149975	1	1	no
XLOC_002650	Elac2	chr11:64979034-65162961	6.4495	8.51438	0.400716	0.04225	0.509653	no
XLOC_002651	Zkscan6	chr11:65807243-65829239	4.16001	4.21373	0.0185135	0.9347	0.995122	no
XLOC_002654	Sco1	chr11:67052669-67067440	5.09215	5.84798	0.199666	0.2111	0.793602	no
XLOC_002664	Stx8	chr11:67966482-68207148	2.38626	2.75261	0.206051	0.3194	0.87327	no
XLOC_002665	Pik3r5	chr11:68432124-68497846	4.48132	4.98679	0.15419	0.3587	0.88774	no
XLOC_002669	Myh10	chr11:68691914-68816624	68.5607	71.8757	0.0681235	0.55655	0.943472	no
XLOC_002671	Rpl26	chr11:68901565-68904534	175.076	216.561	0.306791	0.0164	0.344974	no
XLOC_002673	1500010J02Rik	chr11:69015910-69036473	25.6637	29.1684	0.184678	0.11825	0.706777	no
XLOC_002674	Aurkb	chr11:69045642-69051662	57.215	63.5043	0.150461	0.21005	0.793048	no
XLOC_002676	Tmem107	chr11:69070808-69073293	3.31415	3.8698	0.223623	0.51155	0.93418	no
XLOC_002677	Vamp2	chr11:69088527-69092381	32.6256	25.381	-0.362255	0.00475	0.192392	no
XLOC_002678	Per1	chr11:69098955-69109957	5.96823	5.38782	-0.147602	0.3421	0.878339	no
XLOC_002682	Trappc1	chr11:69323985-69325793	43.0414	46.5507	0.113081	0.4686	0.922319	no
XLOC_002683	Kcnab3	chr11:69326257-69333041	3.80979	3.86668	0.0213856	0.93255	0.995122	no
XLOC_002684	A030009H04Rik	chr11:69340768-69342647	5.78009	4.19052	-0.463962	0.0457	0.525229	no
XLOC_002685	Lsmd1	chr11:69395790-69398234	6.83011	7.14643	0.0653131	0.8781	0.991619	no
XLOC_002686	Trp53	chr11:69580358-69591873	120.03	143.071	0.253334	0.0245	0.404632	no
XLOC_002687	Sat2	chr11:69622108-69623869	5.45735	3.76442	-0.535773	0.12365	0.7113	no
XLOC_002688	Fxr2	chr11:69632970-69653297	12.7572	13.2952	0.0595983	0.6765	0.96726	no
XLOC_002689	Sox15	chr11:69655036-69662642	2.20196	2.28896	0.0559055	1	1	no
XLOC_002690	Mir1934	chr11:69663042-69663125	350.475	0	#NAME?	0.00135	0.102117	no
XLOC_002691	Zbtb4	chr11:69765911-69784026	3.89337	3.7193	-0.0659901	0.65335	0.96726	no
XLOC_002693	1810027O10Rik	chr11:69838524-69839558	4.07839	4.09939	0.00740899	1	1	no
XLOC_002694	Plscr3	chr11:69846371-69858730	4.72547	4.16789	-0.18114	0.4127	0.909623	no
XLOC_002695	Neurl4	chr11:69901877-69913822	17.7948	17.3333	-0.037908	0.75195	0.976839	no
XLOC_002696	Gps2	chr11:69914191-69916591	55.4808	59.6983	0.105702	0.4028	0.906705	no
XLOC_002697	Ybx2	chr11:69935898-69941599	35.8767	27.94	-0.360714	0.0099	0.279204	no
XLOC_002699	Ctdnep1	chr11:69968225-69990600	33.2624	38.8298	0.223271	0.13685	0.722638	no
XLOC_002700	Gabarap	chr11:69991369-69994949	31.0018	32.4193	0.0644997	0.6688	0.96726	no
XLOC_002701	Phf23	chr11:69995770-70000011	11.1495	12.2993	0.141608	0.39255	0.901411	no
XLOC_002702	Dvl2	chr11:70000625-70010109	10.4631	10.5517	0.0121644	0.93645	0.995122	no
XLOC_002703	Mir324	chr11:70010191-70015407	77.5692	0	#NAME?	1	1	no
XLOC_002704	Dlg4	chr11:70018604-70045531	22.1954	20.3535	-0.124989	0.3253	0.87327	no
XLOC_002709	Slc16a11	chr11:70213909-70216414	2.33814	2.27678	-0.0383653	1	1	no
XLOC_002712	Arrb2	chr11:70432652-70440674	14.3549	14.521	0.0165983	0.9174	0.995122	no
XLOC_002713	Med11	chr11:70451930-70453726	2.08092	3.66464	0.816449	0.0675	0.592074	no
XLOC_002714	Zmynd15	chr11:70454233-70466199	1.06375	1.17629	0.14509	1	1	no
XLOC_002717	Psmb6	chr11:70525356-70527858	24.7419	29.326	0.245225	0.13285	0.716775	no
XLOC_002718	Pld2	chr11:70540163-70558110	1.20985	0.97545	-0.310694	1	1	no
XLOC_002719	Mink1	chr11:70562880-70614482	14.6774	15.1007	0.0410243	0.74145	0.976839	no
XLOC_002721	Gp1ba	chr11:70639121-70642055	1.12246	1.48037	0.399297	1	1	no
XLOC_002722	Rnf167	chr11:70647588-70651414	19.8024	18.1063	-0.129185	0.41205	0.909566	no
XLOC_002723	Eno3	chr11:70657212-70662513	10.8887	9.86755	-0.142069	0.44975	0.918477	no
XLOC_002724	Kif1c	chr11:70700547-70731970	6.49757	5.93491	-0.130674	0.34125	0.877676	no
XLOC_002725	Zfp3	chr11:70764446-70772928	5.94878	4.58849	-0.374573	0.09515	0.664426	no
XLOC_002726	Rabep1	chr11:70844762-70969973	14.9759	14.6176	-0.0349343	0.8386	0.986897	no
XLOC_002727	Rpain	chr11:70970199-70983026	11.4644	10.2723	-0.158408	0.5572	0.94359	no
XLOC_002728	Mis12	chr11:71019610-71027134	22.6295	24.0169	0.0858435	0.5007	0.931004	no
XLOC_002729	Wscd1	chr11:71750702-71789646	31.715	30.5338	-0.0547579	0.66145	0.96726	no
XLOC_002730	Fam64a	chr11:72042501-72047370	16.9962	17.2477	0.0211933	0.89075	0.992905	no
XLOC_002732	4930563E22Rik	chr11:72211723-72218450	1.34829	1.3898	0.0437488	1	1	no
XLOC_002734	Xaf1	chr11:72301628-72313733	3.21305	3.02531	-0.0868635	0.71025	0.973186	no
XLOC_002737	Mybbp1a	chr11:72441377-72451550	51.033	58.5244	0.197608	0.07995	0.632894	no
XLOC_002738	Ube2g1	chr11:72607260-72686481	23.6628	25.7968	0.124571	0.29465	0.858689	no
XLOC_002739	Ankfy1	chr11:72690001-72772146	15.5851	14.3544	-0.118674	0.30805	0.868348	no
XLOC_002740	Zzef1	chr11:72796225-72927120	10.5047	10.1648	-0.0474516	0.68465	0.96726	no
XLOC_002744	1200014J11Rik	chr11:73047866-73083579	23.6323	21.7853	-0.117403	0.31275	0.871203	no
XLOC_002745	Itgae	chr11:73090594-73147449	2.21658	2.54257	0.197952	0.53425	0.939662	no
XLOC_002746	P2rx5	chr11:73160529-73172687	1.24785	1.28179	0.0387146	1	1	no
XLOC_002747	Tax1bp3	chr11:73177082-73182046	2.12497	4.63467	1.12502	0.0015	0.107081	no
XLOC_002767	1300001I01Rik	chr11:74649494-74670847	13.2199	15.2449	0.205614	0.09705	0.666226	no
XLOC_002768	Mettl16	chr11:74770862-74818692	17.0918	18.303	0.0987696	0.4587	0.91979	no
XLOC_002769	Mnt	chr11:74830923-74845725	17.0834	16.9584	-0.0105974	0.92955	0.995122	no
XLOC_002770	Tsr1	chr11:74898079-74925798	12.1145	13.1657	0.120048	0.5464	0.941979	no
XLOC_002771	Snord91a	chr11:74898079-74925798	0	3024.1	inf	0.19365	0.777933	no
XLOC_002772	Smg6	chr11:74925871-75164448	31.3984	32.2383	0.0380861	0.73725	0.976839	no
XLOC_002776	Smyd4	chr11:75348432-75405705	10.4091	8.21653	-0.34124	0.02295	0.393596	no
XLOC_002778	Tlcd2	chr11:75468078-75470644	27.8738	23.2573	-0.261227	0.1032	0.672036	no
XLOC_002779	Prpf8	chr11:75486776-75509447	84.0991	91.0569	0.114678	0.328	0.87327	no
XLOC_002780	Rilp	chr11:75510093-75513166	1.19769	0.363109	-1.72178	1	1	no
XLOC_002782	Slc43a2	chr11:75531693-75577572	2.35232	3.12531	0.409917	0.01635	0.344557	no
XLOC_002783	Mir3971	chr11:75531693-75577572	97.4599	236.049	1.27621	0.53165	0.939662	no
XLOC_002784	Pitpna	chr11:75588107-75628778	21.8432	20.7767	-0.0722154	0.5589	0.94359	no
XLOC_002785	Inpp5k	chr11:75631019-75648865	7.31041	6.96209	-0.0704306	0.67945	0.96726	no
XLOC_002786	Myo1c	chr11:75651508-75674634	2.7593	2.73248	-0.0140921	0.9516	0.995122	no
XLOC_002787	Crk	chr11:75679309-75706092	29.0885	30.1767	0.0529867	0.65955	0.96726	no
XLOC_002788	Ywhae	chr11:75732886-75765841	476.572	565.369	0.2465	0.0518	0.54383	no
XLOC_002790	Fam57a	chr11:76202055-76208257	24.644	23.255	-0.0836993	0.6352	0.965444	no
XLOC_002791	Dbil5	chr11:76217612-76218665	1.22496	1.48806	0.280696	1	1	no
XLOC_002792	Rnmtl1	chr11:76243735-76250622	4.79533	4.31409	-0.152576	0.55915	0.943648	no
XLOC_002793	Timm22	chr11:76407166-76416312	6.76456	8.26144	0.288396	0.0885	0.64986	no
XLOC_002797	Blmh	chr11:76945655-76987389	20.0428	21.2598	0.085046	0.5346	0.939662	no
XLOC_002799	Ssh2	chr11:77216424-77460219	24.1099	22.0298	-0.130171	0.2504	0.822752	no
XLOC_002801	Git1	chr11:77493411-77507774	35.8284	40.1294	0.163556	0.15465	0.743005	no
XLOC_002802	Abhd15	chr11:77515116-77520628	1.94924	1.33247	-0.548808	1	1	no
XLOC_002803	Nufip2	chr11:77686138-77717966	27.3352	25.5799	-0.0957477	0.3919	0.901186	no
XLOC_002804	Myo18a	chr11:77777264-77865980	9.70297	8.90131	-0.124409	0.32925	0.87327	no
XLOC_002805	Sez6	chr11:77930942-77979042	5.06546	7.15799	0.498861	0.0027	0.148266	no
XLOC_002806	Phf12	chr11:77982815-78030535	71.2063	66.3756	-0.10135	0.3632	0.88774	no
XLOC_002807	Dhrs13	chr11:78032312-78037864	3.02569	3.09611	0.0331964	0.90025	0.993721	no
XLOC_002808	Flot2	chr11:78037940-78060432	9.10757	10.196	0.162861	0.29485	0.858689	no
XLOC_002811	BC017647	chr11:78094672-78157339	33.8152	32.4035	-0.0615221	0.5898	0.954584	no
XLOC_002812	Tlcd1	chr11:78178765-78180772	4.96255	4.79647	-0.0491097	0.855	0.987741	no
XLOC_002813	Rab34	chr11:78188426-78192193	10.0442	11.1013	0.144365	0.46065	0.91979	no
XLOC_002814	Proca1	chr11:78193391-78205763	1.51444	1.95757	0.370281	1	1	no
XLOC_002815	Sdf2	chr11:78245745-78255496	8.44098	9.40587	0.156152	0.4654	0.921406	no
XLOC_002816	2610507B11Rik	chr11:78261753-78290625	47.7145	48.1423	0.012877	0.91125	0.994636	no
XLOC_002817	Spag5	chr11:78301590-78322454	34.849	37.7819	0.116577	0.31095	0.870294	no
XLOC_002818	Aldoc	chr11:78324197-78326760	42.4406	41.736	-0.0241508	0.8548	0.987741	no
XLOC_002819	Pigs	chr11:78328421-78342776	29.8973	37.3398	0.320698	0.0096	0.276897	no
XLOC_002820	Unc119	chr11:78343521-78349156	9.59393	8.559	-0.16468	0.45385	0.91979	no
XLOC_002822	Slc46a1	chr11:78465700-78471945	2.31942	3.27167	0.496264	0.09015	0.652117	no
XLOC_002823	Vtn	chr11:78499119-78502325	0.573459	1.00217	0.805361	1	1	no
XLOC_002825	Poldip2	chr11:78512295-78522736	17.0182	18.801	0.143729	0.32195	0.87327	no
XLOC_002826	Ift20	chr11:78536435-78541473	22.9006	22.8899	-0.000669234	0.98205	0.995455	no
XLOC_002827	1810012P15Rik	chr11:78826594-78843899	8.79729	7.71978	-0.188499	0.16995	0.759608	no
XLOC_002829	Gm11201	chr11:79014800-79146354	1.72597	1.88075	0.123898	1	1	no
XLOC_002830	Nf1	chr11:79339891-79581609	37.7078	36.3601	-0.0525056	0.6984	0.968438	no
XLOC_002831	Rab11fip4	chr11:79591211-79694012	6.6917	5.49788	-0.283496	0.1451	0.730676	no
XLOC_002834	Suz12	chr11:79993105-80034123	69.1909	70.9796	0.0368212	0.74975	0.976839	no
XLOC_002835	Atad5	chr11:80089399-80135791	52.0966	48.5154	-0.102748	0.35735	0.88774	no
XLOC_002838	Rhot1	chr11:80209054-80267907	13.3514	14.7803	0.146685	0.2484	0.821359	no
XLOC_002839	Rhbdl3	chr11:80300911-80355986	23.0658	21.5529	-0.0978753	0.4214	0.90999	no
XLOC_002840	Zfp207	chr11:80383278-80405873	220.361	216.468	-0.0257184	0.82315	0.985547	no
XLOC_002841	Psmd11	chr11:80428614-80472133	40.935	44.46	0.119175	0.34075	0.877676	no
XLOC_002842	Cdk5r1	chr11:80477045-80481179	2.40383	2.11019	-0.187961	1	1	no
XLOC_002843	Tmem98	chr11:80810414-80822033	17.7886	20.7866	0.224695	0.1674	0.759048	no
XLOC_002854	Zfp830	chr11:82764344-82767622	25.1473	24.1053	-0.0610543	0.62135	0.964014	no
XLOC_002855	Lig3	chr11:82781134-82871210	34.1067	32.837	-0.0547336	0.6688	0.96726	no
XLOC_002858	Slfn5	chr11:82911252-82964850	13.5602	13.01	-0.0597581	0.62325	0.964014	no
XLOC_002863	AI662270	chr11:83223575-83226584	1.62547	1.44793	-0.166857	1	1	no
XLOC_002864	AA465934,AI450353	chr11:83291698-83298977	70.6926	65.6606	-0.10653	0.4649	0.92125	no
XLOC_002865	Ap2b1	chr11:83302696-83405033	24.2227	27.5162	0.183918	0.1139	0.699068	no
XLOC_002868	Taf15	chr11:83473107-83506740	65.3686	66.0051	0.0139805	0.90375	0.993721	no
XLOC_002869	E230016K23Rik	chr11:83582060-83623693	5.93582	5.6646	-0.0674732	0.7321	0.976839	no
XLOC_002874	Heatr6	chr11:83753636-83783754	19.3507	20.5212	0.0847347	0.47135	0.923675	no
XLOC_002876	Ddx52	chr11:83942089-83963086	16.1158	15.2724	-0.0775475	0.5522	0.942298	no
XLOC_002877	Synrg	chr11:83964427-84042079	17.7872	18.5783	0.0627832	0.60055	0.959266	no
XLOC_002878	Acaca	chr11:84195437-84401651	29.965	30.1973	0.0111443	0.91785	0.995122	no
XLOC_002881	Myo19	chr11:84876312-84916356	19.3807	18.2809	-0.0842844	0.53925	0.939678	no
XLOC_002884	D630032N06Rik	chr11:85235165-85238304	5.36491	4.39392	-0.288046	0.47595	0.92401	no
XLOC_002885	Ppm1d	chr11:85311253-85347071	20.4253	20.8473	0.0295033	0.8189	0.985547	no
XLOC_002886	Bcas3	chr11:85353163-85826058	3.98036	3.98661	0.00226432	0.9903	0.995455	no
XLOC_002890	Rnft1	chr11:86415843-86544807	4.80659	4.48102	-0.101187	0.79335	0.98136	no
XLOC_002891	Tubd1	chr11:86544990-86567360	3.34299	3.08576	-0.115512	0.65495	0.96726	no
XLOC_002892	Ptrh2	chr11:86683982-86692457	20.1905	21.0016	0.0568241	0.6513	0.96726	no
XLOC_002893	Fam33a	chr11:87109260-87122974	32.6117	30.6597	-0.0890458	0.52275	0.938472	no
XLOC_002894	Mir301	chr11:87109260-87122974	273.82	167.73	-0.707085	0.73155	0.976839	no
XLOC_002895	Trim37	chr11:87127076-87220682	32.3858	32.7413	0.015754	0.88945	0.992905	no
XLOC_002897	2017-09-04	chr11:87581130-87590539	1.33554	1.28864	-0.0515783	1	1	no
XLOC_002898	Mtmr4	chr11:87592216-87616296	16.0439	16.523	0.0424484	0.7189	0.974979	no
XLOC_002899	Hsf5	chr11:87617163-87659542	1.15568	1.16167	0.0074592	1	1	no
XLOC_002900	Rnf43	chr11:87663086-87735539	0.878858	1.17504	0.419006	1	1	no
XLOC_002902	Supt4h1	chr11:87737564-87743617	13.0276	15.1939	0.221923	0.36445	0.888134	no
XLOC_002904	Bzrap1	chr11:87760540-87785928	1.5725	1.14051	-0.463379	1	1	no
XLOC_002906	Mks1	chr11:87853224-87863679	5.28038	4.96173	-0.0897974	0.6545	0.96726	no
XLOC_002907	Srsf1	chr11:88047670-88053757	83.6078	76.3166	-0.13164	0.2542	0.827127	no
XLOC_002908	Vezf1	chr11:88068340-88084729	76.0398	77.7802	0.0326496	0.7693	0.980084	no
XLOC_002909	Cuedc1	chr11:88098057-88194140	13.9067	12.4	-0.165438	0.2434	0.81794	no
XLOC_002910	Mrps23	chr11:88204417-88211507	4.67203	6.2919	0.429446	0.1053	0.675636	no
XLOC_002912	Mir378b	chr11:88339381-88718267	4765.57	4626.07	-0.0428627	0.97585	0.995455	no
XLOC_002913	C030037D09Rik	chr11:88718642-88728572	10.0719	8.30026	-0.279105	0.24145	0.816896	no
XLOC_002914	4930405P13Rik	chr11:88905927-88955442	53.5545	46.9679	-0.189332	0.35745	0.88774	no
XLOC_002916	Coil	chr11:88973934-88991613	9.9363	10.4751	0.0761886	0.626	0.964014	no
XLOC_002917	Trim25	chr11:88999402-89020293	1.63244	1.73409	0.0871538	1	1	no
XLOC_002920	Mmd	chr11:90249475-90278573	4.21764	3.95122	-0.0941378	0.654	0.96726	no
XLOC_002921	Cox11	chr11:90638183-90687601	10.7591	9.91067	-0.1185	0.57665	0.948954	no
XLOC_002924	Mbtd1	chr11:93886218-93946984	71.9403	72.7435	0.016018	0.8903	0.992905	no
XLOC_002925	Spag9	chr11:93996090-94126082	65.0159	58.0068	-0.16457	0.14765	0.7342	no
XLOC_002926	Tob1	chr11:94211453-94215492	69.0732	76.5587	0.148441	0.19725	0.781745	no
XLOC_002927	Ankrd40	chr11:94328000-94341847	18.4586	19.5209	0.0807269	0.5156	0.935385	no
XLOC_002929	Lrrc59	chr11:94629823-94653754	50.827	63.7369	0.326532	0.01985	0.374136	no
XLOC_002930	Mrpl27	chr11:94653790-94660087	87.7321	80.1523	-0.130361	0.32195	0.87327	no
XLOC_002931	Col1a1	chr11:94936269-94951856	1.27533	2.11479	0.72965	1	1	no
XLOC_002933	Ppp1r9b	chr11:94991211-95006898	12.9744	14.9117	0.200776	0.12315	0.7113	no
XLOC_002934	Samd14	chr11:95009878-95026087	19.357	17.2023	-0.170251	0.19095	0.77668	no
XLOC_002937	Tac4	chr11:95261528-95269261	2.29083	1.87083	-0.29219	1	1	no
XLOC_002938	Fam117a	chr11:95337017-95381872	2.80863	3.15994	0.170032	0.5058	0.932809	no
XLOC_002939	Slc35b1	chr11:95384921-95391652	24.6104	26.3278	0.0973189	0.5318	0.939662	no
XLOC_002940	Spop	chr11:95414082-95493410	25.4572	27.5917	0.11616	0.3492	0.883138	no
XLOC_002941	Phb	chr11:95666956-95680773	8.5578	11.5831	0.436715	0.0166	0.345365	no
XLOC_002942	B130006D01Rik	chr11:95723585-95726773	6.6655	7.1333	0.0978551	0.5481	0.942298	no
XLOC_002943	Zfp652	chr11:95749066-95764713	40.3292	42.8509	0.087502	0.46035	0.91979	no
XLOC_002946	4833417C18Rik	chr11:95858816-95861046	12.606	13.0121	0.0457404	0.80775	0.98433	no
XLOC_002948	Snf8	chr11:96034916-96047405	7.30838	5.07895	-0.525021	0.07945	0.631509	no
XLOC_002964	Cbx1	chr11:96789135-96808640	51.8893	53.1895	0.0357032	0.793	0.98136	no
XLOC_002965	Copz2	chr11:96849875-96861202	1.14497	3.46507	1.59758	0.0172	0.353099	no
XLOC_002968	D030028A08Rik	chr11:96944145-96977688	4.03617	4.39898	0.124184	0.70265	0.969284	no
XLOC_002970	Scrn2	chr11:97029951-97033960	2.41803	2.44044	0.0133061	1	1	no
XLOC_002971	Mrpl10	chr11:97041585-97049213	13.0337	13.8255	0.0850856	0.6189	0.963979	no
XLOC_002972	Osbpl7	chr11:97050819-97068904	3.87782	2.90203	-0.418181	0.0438	0.519505	no
XLOC_002973	Mrpl45	chr11:97315715-97329920	6.88407	7.63801	0.149934	0.397	0.904175	no
XLOC_002974	Socs7	chr11:97362550-97398542	11.5065	10.7097	-0.103526	0.3964	0.903482	no
XLOC_002975	Arhgap23	chr11:97450159-97502400	2.52853	2.37286	-0.0916698	0.64275	0.96688	no
XLOC_002977	Mllt6	chr11:97663411-97685458	27.9706	28.354	0.019641	0.8649	0.989274	no
XLOC_002978	Cisd3	chr11:97685951-97688625	16.9672	14.1839	-0.258498	0.2597	0.83152	no
XLOC_002979	Psmb3	chr11:97703433-97713500	21.1069	25.1884	0.255048	0.1932	0.777933	no
XLOC_002980	Lasp1	chr11:97799671-97838764	11.8949	11.7308	-0.0200393	0.8839	0.992185	no
XLOC_002981	B230217C12Rik	chr11:97840779-97843043	6.38596	5.98962	-0.0924385	0.7154	0.974233	no
XLOC_002982	Rpl19	chr11:98026709-98030493	119.428	157.678	0.40084	0.0018	0.118842	no
XLOC_002983	Cdk12	chr11:98203304-98253540	67.3068	69.0628	0.037156	0.74635	0.976839	no
XLOC_002984	Mir5119	chr11:98262605-98262662	7402.38	1727.34	-2.09944	0.24405	0.81794	no
XLOC_002986	Stard3	chr11:98358367-98381112	8.91625	9.21774	0.0479767	0.786	0.98136	no
XLOC_002989	Erbb2	chr11:98412483-98438988	8.96162	8.31965	-0.107237	0.44605	0.918261	no
XLOC_002998	Thra	chr11:98741872-98765111	21.6889	22.0559	0.0242065	0.8541	0.987741	no
XLOC_002999	Msl1	chr11:98795768-98833807	73.3834	75.12	0.0337447	0.80515	0.98347	no
XLOC_003000	Casc3	chr11:98795768-98833807	35.8636	34.3054	-0.0640841	0.77235	0.980416	no
XLOC_003001	Rapgefl1	chr11:98836784-98853005	2.37264	1.92515	-0.301518	1	1	no
XLOC_003002	Wipf2	chr11:98863597-98905578	14.364	14.8046	0.0435897	0.7116	0.973393	no
XLOC_003003	Cdc6	chr11:98907888-98923942	10.0793	9.47254	-0.089571	0.5143	0.934923	no
XLOC_003004	Rara	chr11:98937695-98974942	5.8372	5.88098	0.0107809	0.9513	0.995122	no
XLOC_003005	Igfbp4	chr11:99041259-99052643	11.214	10.9799	-0.0304317	0.85855	0.988146	no
XLOC_003015	Eif1	chr11:100319995-100322096	66.9401	80.4131	0.264559	0.0329	0.459393	no
XLOC_003017	Fkbp10	chr11:100415693-100441089	1.3828	1.74529	0.335873	1	1	no
XLOC_003018	Klhl10	chr11:100441923-100457024	1.76326	1.76915	0.0048038	1	1	no
XLOC_003020	Cnp	chr11:100574938-100581739	2.45964	1.36019	-0.854637	0.0091	0.269275	no
XLOC_003021	Nkiras2	chr11:100622954-100650693	1.78287	2.13841	0.262342	1	1	no
XLOC_003024	Atp6v0a1	chr11:101009451-101063717	18.0764	16.3449	-0.14527	0.2562	0.82795	no
XLOC_003025	Naglu	chr11:101070093-101077671	1.00071	1.67748	0.745279	1	1	no
XLOC_003027	Coasy	chr11:101082624-101086619	8.70781	9.71533	0.157952	0.348	0.882448	no
XLOC_003028	Mlx	chr11:101087289-101095435	7.42774	8.39502	0.17661	0.51085	0.93418	no
XLOC_003029	Tubg1	chr11:101120130-101126419	22.166	24.4486	0.141406	0.3277	0.87327	no
XLOC_003033	Vps25	chr11:101253742-101259546	23.7037	26.0355	0.135364	0.4007	0.905155	no
XLOC_003035	Cntd1	chr11:101279202-101302267	2.82404	4.03277	0.514014	0.15535	0.743458	no
XLOC_003036	Psme3	chr11:101316250-101323530	68.2766	73.3816	0.104027	0.3566	0.88774	no
XLOC_003037	Aoc2	chr11:101325062-101329694	6.81388	5.9523	-0.19503	0.29185	0.857015	no
XLOC_003040	Rundc1	chr11:101418813-101435665	10.8636	10.4227	-0.059772	0.68695	0.96726	no
XLOC_003041	Rpl27	chr11:101442244-101445596	84.6552	110.265	0.381305	0.00385	0.180224	no
XLOC_003043	Rnd2	chr11:101468337-101471306	9.30934	13.3904	0.524446	0.0593	0.558849	no
XLOC_003044	Nbr1	chr11:101552106-101581951	28.9764	29.6162	0.0315078	0.7889	0.98136	no
XLOC_003047	Rdm1	chr11:101627948-101636081	14.194	16.235	0.193823	0.2958	0.859847	no
XLOC_003049	Dhx8	chr11:101732955-101767357	13.6111	15.129	0.152529	0.23265	0.810403	no
XLOC_003054	G6pc3	chr11:102189698-102194081	21.2196	23.534	0.14935	0.322	0.87327	no
XLOC_003055	BC030867	chr11:102248881-102265183	15.6457	17.156	0.132944	0.334	0.873585	no
XLOC_003057	Tmub2	chr11:102284960-102296629	4.47674	5.50619	0.298605	0.38435	0.899231	no
XLOC_003058	Rundc3a	chr11:102393402-102402939	3.97802	4.02165	0.0157378	0.94005	0.995122	no
XLOC_003059	Grn	chr11:102430321-102436809	11.5021	13.6451	0.246481	0.1088	0.686391	no
XLOC_003060	Fzd2	chr11:102604430-102608058	26.5692	26.6691	0.0054151	0.96555	0.995455	no
XLOC_003062	Adam11	chr11:102761438-102780262	3.16278	3.29517	0.059159	0.7452	0.976839	no
XLOC_003063	Higd1b	chr11:102836295-102838039	3.2257	3.08387	-0.0648716	0.88055	0.992074	no
XLOC_003065	Nmt1	chr11:103028561-103066105	13.344	18.2094	0.448497	0.0034	0.169584	no
XLOC_003066	Acbd4	chr11:103101687-103112199	0.548729	1.00755	0.876681	1	1	no
XLOC_003067	Hexim1	chr11:103116324-103119724	14.347	11.4824	-0.321321	0.0201	0.376982	no
XLOC_003068	Hexim2	chr11:103133338-103139908	1.81777	1.01951	-0.834296	1	1	no
XLOC_003073	Arf2	chr11:103966870-103985336	11.5936	13.5214	0.221915	0.1294	0.715924	no
XLOC_003076	Mapt	chr11:104231435-104332093	1.7628	1.67907	-0.0701998	1	1	no
XLOC_003080	Mettl2	chr11:105126424-105141146	12.1572	12.4526	0.0346286	0.81095	0.984349	no
XLOC_003081	Tlk2	chr11:105181529-105283956	29.8927	29.7109	-0.00880295	0.9376	0.995122	no
XLOC_003082	Mrc2	chr11:105292645-105351145	14.5659	14.6464	0.00795935	0.9477	0.995122	no
XLOC_003083	Tanc2	chr11:105589985-105929303	9.05923	8.79595	-0.0425487	0.71315	0.973627	no
XLOC_003087	Dcaf7	chr11:106036871-106059323	27.3978	28.2095	0.0421244	0.70855	0.972256	no
XLOC_003088	Taco1	chr11:106066106-106073612	3.67966	4.97357	0.43471	0.1326	0.716775	no
XLOC_003089	Map3k3	chr11:106084901-106155434	10.6892	9.07708	-0.235854	0.1129	0.696298	no
XLOC_003090	Ddx42	chr11:106216925-106249140	37.776	37.8656	0.00341821	0.97615	0.995455	no
XLOC_003091	Psmc5	chr11:106256184-106263112	53.0592	62.389	0.233691	0.06775	0.592074	no
XLOC_003094	Snord104	chr11:106500990-106501063	1078.86	852.957	-0.338969	0.76375	0.978745	no
XLOC_003095	Gm885	chr11:106751267-106767568	4.63899	4.18508	-0.148555	0.59205	0.956274	no
XLOC_003096	Ccdc45	chr11:106789251-106818861	28.1214	25.5392	-0.138955	0.26735	0.841266	no
XLOC_003097	1810010H24Rik	chr11:107028222-107030442	1.7746	1.56498	-0.181346	1	1	no
XLOC_003098	Psmd12	chr11:107479527-107498036	37.2192	39.7525	0.0949977	0.45835	0.91979	no
XLOC_003099	Helz	chr11:107547959-107686943	34.4602	32.4464	-0.0868706	0.44255	0.916013	no
XLOC_003101	Ccdc46	chr11:108425265-108860615	20.557	18.3559	-0.163388	0.20995	0.793048	no
XLOC_003102	Axin2	chr11:108920348-108950781	23.8097	24.6166	0.0480843	0.68815	0.96726	no
XLOC_003104	Gna13	chr11:109354777-109401369	19.5363	21.1028	0.111271	0.3552	0.886534	no
XLOC_003105	Amz2	chr11:109425945-109438148	11.9082	12.1005	0.0231214	0.86835	0.98985	no
XLOC_003107	Arsg	chr11:109440077-109573329	1.40317	2.08908	0.574181	1	1	no
XLOC_003108	Prkar1a	chr11:109650948-109669648	33.0807	32.025	-0.0467917	0.6932	0.967987	no
XLOC_003110	Map2k6	chr11:110399121-110513637	18.8707	17.2753	-0.12743	0.365	0.888337	no
XLOC_003111	Kcnj16	chr11:110968032-111027967	1.28818	1.10761	-0.217889	1	1	no
XLOC_003113	Sox9	chr11:112782209-112787757	105.731	108.028	0.0310115	0.7826	0.9813	no
XLOC_003114	Sstr2	chr11:113624256-113625636	11.5158	13.0178	0.17687	0.37885	0.896699	no
XLOC_003115	Cog1	chr11:113649528-113684151	14.2803	16.7603	0.231023	0.19475	0.779098	no
XLOC_003116	D11Wsu47e	chr11:113684411-113694647	12.359	10.2455	-0.270573	0.0963	0.66542	no
XLOC_003118	Rpl38	chr11:114344525-114757886	314.189	411.479	0.389187	0.0572	0.557456	no
XLOC_003119	Ttyh2	chr11:114344525-114757886	8.0009	8.98343	0.167104	0.4714	0.923675	no
XLOC_003121	Kif19a	chr11:114765388-114790575	2.88317	2.48176	-0.216289	0.34145	0.877795	no
XLOC_003123	Gprc5c	chr11:114851531-114872617	2.2041	2.36325	0.100577	0.653	0.96726	no
XLOC_003124	Cd300a	chr11:114890040-114904651	11.1163	10.4732	-0.0859718	0.51255	0.93418	no
XLOC_003126	Slc9a3r1	chr11:115163340-115181178	2.93627	4.18247	0.51037	0.05475	0.549521	no
XLOC_003127	Tmem104	chr11:115187486-115247025	4.19457	4.25645	0.0211289	0.90385	0.993721	no
XLOC_003130	Cdr2l	chr11:115381915-115396132	14.3913	14.2184	-0.0174358	0.8941	0.993135	no
XLOC_003131	Ict1	chr11:115403765-115410913	19.2888	22.1159	0.197324	0.3284	0.87327	no
XLOC_003132	Kctd2	chr11:115420125-115431274	11.7222	14.2559	0.282318	0.0987	0.669393	no
XLOC_003135	Armc7	chr11:115475676-115491814	1.69759	2.12922	0.326839	1	1	no
XLOC_003136	Nup85	chr11:115564443-115583924	28.1759	30.8877	0.132571	0.29965	0.862692	no
XLOC_003137	Mrps7	chr11:115604150-115607624	18.6661	18.5754	-0.00702926	0.9622	0.995397	no
XLOC_003138	2310067B10Rik	chr11:115765432-115799033	15.5668	16.0503	0.0441303	0.7262	0.976072	no
XLOC_003139	Tsen54	chr11:115814738-115823102	4.1623	4.20569	0.0149623	0.95175	0.995122	no
XLOC_003141	2210020M01Rik	chr11:115892594-115933492	0.526493	1.15355	1.13159	1	1	no
XLOC_003142	1110017F19Rik	chr11:115892594-115933492	9.94837	9.95942	0.00160169	0.9835	0.995455	no
XLOC_003143	Sap30bp	chr11:115933658-115965534	12.2519	11.9181	-0.0398605	0.80115	0.982409	no
XLOC_003145	Unk	chr11:116030321-116061194	33.8846	30.4589	-0.153762	0.1885	0.77668	no
XLOC_003146	2310004N24Rik	chr11:116171887-116215318	9.35682	5.98805	-0.643931	0.24595	0.819448	no
XLOC_003147	Cdk3-ps	chr11:116216001-116220287	1.15418	1.02799	-0.167047	1	1	no
XLOC_003149	Fam100b	chr11:116434093-116439077	21.4167	25.0397	0.225482	0.14355	0.729048	no
XLOC_003150	Sphk1	chr11:116531910-116536675	1.50468	0.937588	-0.682435	1	1	no
XLOC_003153	1810032O08Rik,Snord1a	chr11:116671659-116675798	14.7454	172.104	3.54495	0.18855	0.77668	no
XLOC_003155	Snord1b	chr11:116671659-116675798	0	179.161	inf	1	1	no
XLOC_003156	BC018473	chr11:116752166-116757883	1.37891	1.0251	-0.427761	1	1	no
XLOC_003157	1110005A03Rik	chr11:116843514-116849740	12.0128	10.1555	-0.24231	0.25975	0.83152	no
XLOC_003158	Mfsd11	chr11:116854014-116875637	12.3959	13.6284	0.136754	0.3241	0.87327	no
XLOC_003159	Mgat5b	chr11:116918862-116986944	10.1125	12.8031	0.340349	0.01175	0.305714	no
XLOC_003160	2810008D09Rik	chr11:117076782-117078955	12.5196	17.694	0.499078	0.06885	0.595705	no
XLOC_003161	Sec14l1	chr11:117115171-117159268	19.8055	18.5241	-0.0965013	0.48365	0.926889	no
XLOC_003162	2017-09-09	chr11:117199660-117362325	31.0412	33.5546	0.112326	0.35475	0.886379	no
XLOC_003164	Tnrc6c	chr11:117654288-117763441	29.8192	27.7097	-0.10585	0.3442	0.879451	no
XLOC_003165	Tmc8	chr11:117782296-117793137	1.30512	1.71967	0.397953	1	1	no
XLOC_003167	Syngr2	chr11:117809666-117814286	11.0591	13.1535	0.25022	0.16705	0.758365	no
XLOC_003168	Afmid	chr11:117815518-117839908	6.34391	6.21631	-0.0293124	0.9384	0.995122	no
XLOC_003169	Birc5	chr11:117849236-117855743	30.6466	37.3635	0.285905	0.0469	0.529863	no
XLOC_003171	Pgs1	chr11:117986856-118129219	9.66965	10.3015	0.0913156	0.69155	0.967987	no
XLOC_003173	Engase	chr11:118476959-118489198	0.845295	1.3735	0.700333	1	1	no
XLOC_003175	Cbx2	chr11:119023028-119031270	39.4692	36.323	-0.119844	0.30405	0.867315	no
XLOC_003176	Ccdc40	chr11:119228571-119265212	4.4001	5.30707	0.27038	0.0895	0.651491	no
XLOC_003177	Gaa	chr11:119267966-119285698	7.42328	8.40753	0.179625	0.2331	0.810403	no
XLOC_003179	Slc26a11	chr11:119355556-119381076	6.35664	6.94037	0.126748	0.4737	0.923675	no
XLOC_003181	A730011L01Rik	chr11:119491346-119511465	15.2964	15.1441	-0.0144328	0.9047	0.993721	no
XLOC_003183	Rptor	chr11:119602994-119899591	16.6259	18.2116	0.131422	0.2725	0.845787	no
XLOC_003184	Chmp6	chr11:119913809-119919552	2.80468	3.67994	0.391842	0.18955	0.77668	no
XLOC_003185	Baiap2	chr11:119943091-120006782	3.11041	3.1908	0.0368134	0.8905	0.992905	no
XLOC_003187	1810043H04Rik	chr11:120098933-120100424	8.13366	6.9659	-0.223596	0.57735	0.949121	no
[truncated: 11,168 more rows]

## Sheet: DEG
test_id	gene	locus	WT FPKM	MYC-OE FPKM	log2(fold_change)	p_value	q_value	significant
XLOC_008068	Zfp654	chr16:64780346-64786321	6.12855	4.30393	-0.509891	0.00125	0.0991493	yes
XLOC_003284	Slc1a4	chr11:20302179-20332713	13.9674	18.6589	0.4178	0.0012	0.095849	yes
XLOC_007155	Plec	chr15:76170973-76231378	2.41874	3.25222	0.42717	0.0012	0.0958489	yes
XLOC_006903	Tuba1c	chr15:99029890-99038105	7.58084	11.5755	0.610649	0.0012	0.0958489	yes
XLOC_012756	Kcnn3	chr3:89520163-89672494	2.9594	1.98703	-0.57469	0.0011	0.0897443	yes
XLOC_012849	Sf3b4	chr3:96172549-96177564	44.4739	58.7084	0.400606	0.0011	0.0897443	yes
XLOC_005083	Arl10	chr13:54575012-54581128	7.55957	13.2034	0.804536	0.00105	0.0869065	yes
XLOC_018056	Pcsk6	chr7:65862135-66050386	3.2684	5.01022	0.616291	0.00105	0.0869065	yes
XLOC_014812	Nudc	chr4:133532541-133546027	38.8707	51.9791	0.41925	0.001	0.0839853	yes
XLOC_020752	2810004N23Rik	chr8:124839354-124863029	23.3772	32.8833	0.492252	0.00095	0.080377	yes
XLOC_010773	Rpl12	chr2:32961711-32964045	142.827	190.597	0.416262	0.00095	0.080377	yes
XLOC_003541	Eif5a	chr11:69916711-69921958	189.995	248.85	0.389315	0.0009	0.0772917	yes
XLOC_016046	Noc4l	chr5:110648418-110653382	9.67205	14.2418	0.558236	0.0009	0.0772917	yes
XLOC_000091	2900092D14Rik	chr1:42700335-42703176	203.397	156.296	-0.380023	0.00085	0.0741122	yes
XLOC_015506	Setd8	chr5:124439929-124462307	81.4677	106.064	0.380631	0.00085	0.0741122	yes
XLOC_007368	Tuba1a	chr15:98949846-98953501	170.582	220.877	0.372784	0.00085	0.0741122	yes
XLOC_018978	2310044H10Rik	chr7:44489937-44496513	19.7551	27.4795	0.47613	0.0008	0.0713875	yes
XLOC_008788	Has1	chr17:17843325-17855188	8.02036	4.87989	-0.716818	0.0008	0.0713875	yes
XLOC_009489	Camk2a	chr18:60925631-60988152	14.9777	11.0455	-0.439358	0.00075	0.0679881	yes
XLOC_019121	Nr2f2	chr7:70351949-70411146	5.26028	7.78697	0.565922	0.00075	0.0679881	yes
XLOC_011293	Nxt1	chr2:148672614-148676026	11.253	18.4934	0.716707	0.00075	0.0679881	yes
XLOC_002367	Pes1	chr11:3963974-3980004	11.1036	15.3797	0.470001	0.00075	0.0679881	yes
XLOC_016619	Suclg1	chr6:73248504-73276907	5.08058	8.91335	0.810976	0.00075	0.0679881	yes
XLOC_015518	Tmem132b	chr5:125532417-125792583	5.21491	3.68376	-0.501465	0.00075	0.0679881	yes
XLOC_003552	Pelp1	chr11:70392880-70410031	14.7917	20.2279	0.451554	0.0007	0.0666283	yes
XLOC_019428	Dkk3	chr7:112116018-112159057	6.67578	9.7599	0.547929	0.00065	0.0623891	yes
XLOC_011442	Pigt	chr2:164497524-164508301	28.972	39.4441	0.445148	0.00065	0.0623891	yes
XLOC_019233	Serpinh1	chr7:99345374-99353239	18.1836	25.0819	0.464005	0.00065	0.0623891	yes
XLOC_018031	Slc17a6	chr7:51621829-51671126	5.67109	8.18981	0.530203	0.00065	0.0623891	yes
XLOC_022642	Elk1	chrX:20933394-20950608	29.5149	22.06	-0.420013	0.0006	0.059593	yes
XLOC_006556	Kctd12	chr14:102976580-102982637	2.36526	1.37478	-0.782795	0.0006	0.059593	yes
XLOC_011567	Pcmtd2	chr2:181837902-181857450	8.18339	5.66874	-0.529669	0.0006	0.059593	yes
XLOC_009695	Pggt1b	chr18:46239948-46280850	15.0866	10.6054	-0.508476	0.00055	0.0560902	yes
XLOC_002996	Psmd3	chr11:98682553-98695978	14.7948	21.0772	0.510592	0.00055	0.0560902	yes
XLOC_013261	Rps3a	chr3:86137939-86142668	108.103	143.381	0.40744	0.00055	0.0560902	yes
XLOC_011882	Tmx2	chr2:84671316-84678047	14.8682	21.0506	0.501636	0.00055	0.0560902	yes
XLOC_005830	Wnt5a	chr14:28505472-28525515	2.41801	4.0475	0.743211	0.00055	0.0560902	yes
XLOC_002253	Dyrk2	chr10:118859348-118868903	20.1218	14.3701	-0.485686	0.0005	0.0533738	yes
XLOC_015866	Rpl9	chr5:65388363-65391431	148.106	201.798	0.446284	0.0005	0.0533738	yes
XLOC_004106	Sdc1	chr12:8771395-8793687	8.27948	11.9467	0.528998	0.0005	0.0533738	yes
XLOC_010535	Sorcs1	chr19:50143300-50678646	3.77953	2.44899	-0.626023	0.0005	0.0533738	yes
XLOC_005098	Tmed9	chr13:55593134-55597694	20.3038	29.0543	0.516996	0.0005	0.0533738	yes
XLOC_006792	Tomm22	chr15:79670867-79672862	25.4269	37.6192	0.565114	0.0005	0.0533738	yes
XLOC_015736	Pus7	chr5:23740695-23783661	14.492	19.8549	0.454241	0.00045	0.0508901	yes
XLOC_018311	Rpl27a	chr7:109519194-109522369	77.6067	105.249	0.439553	0.00045	0.0508901	yes
XLOC_009098	Slc29a1	chr17:45585199-45599603	8.0367	12.3319	0.617716	0.00045	0.0508901	yes
XLOC_004736	Tmed10	chr12:85340613-85374717	15.4847	21.2249	0.454915	0.00045	0.0508901	yes
XLOC_008422	Wdr46	chr17:33940722-33949695	22.1202	30.8649	0.480607	0.00045	0.0508901	yes
XLOC_020863	Bmper	chr9:23223075-23485202	11.9325	8.39606	-0.507107	0.0004	0.0475917	yes
XLOC_013596	Cyr61	chr3:145646970-145649985	42.3092	57.3275	0.438255	0.0004	0.0475917	yes
XLOC_011801	Ermn	chr2:58045114-58052752	6.76252	4.45163	-0.60323	0.0004	0.0475917	yes
XLOC_012702	Sfrp2	chr3:83766320-83774314	17.2137	24.7019	0.521062	0.0004	0.0475917	yes
XLOC_016128	Aldh2	chr5:121567686-121593824	3.0376	5.82378	0.939025	0.00035	0.0434533	yes
XLOC_023129	Ddx3y	chrY:1260714-1286613	9.51642	6.6444	-0.51828	0.00035	0.0434533	yes
XLOC_005562	Gm5141	chr13:62772199-62785808	5.62323	3.44007	-0.70896	0.00035	0.0434533	yes
XLOC_002042	Mif	chr10:75859352-75860250	59.4671	90.0459	0.59857	0.00035	0.0434533	yes
XLOC_006911	Tmbim6	chr15:99392946-99410049	32.3317	43.8103	0.438322	0.00035	0.0434533	yes
XLOC_011631	Tubb4b	chr2:25218744-25224702	55.7381	75.1682	0.43146	0.00035	0.0434533	yes
XLOC_002637	2410006H16Rik	chr11:62602876-62604806	29.9401	53.8978	0.848147	0.0003	0.0398442	yes
XLOC_014735	Cdca8	chr4:124918464-124936917	50.1059	69.0735	0.463154	0.0003	0.0398442	yes
XLOC_009929	Fads3	chr19:10041547-10059671	4.4356	2.58746	-0.777594	0.0003	0.0398442	yes
XLOC_016178	Gusb	chr5:129989020-130002828	2.63466	5.05407	0.939826	0.0003	0.0398442	yes
XLOC_010478	Rrp12	chr19:41862850-41896153	7.13964	10.2836	0.526419	0.0003	0.0398442	yes
XLOC_003419	Sparc	chr11:55394500-55420080	39.7291	54.0941	0.445273	0.0003	0.0398442	yes
XLOC_022605	Wdr13	chrX:8123300-8132858	13.8905	9.94303	-0.482344	0.0003	0.0398442	yes
XLOC_006555	Commd6	chr14:101633765-101640471	9.00225	16.6721	0.889077	0.00025	0.0361456	yes
XLOC_013868	Dmrta1	chr4:89688197-89694766	33.6283	24.9784	-0.428997	0.00025	0.0361456	yes
XLOC_011284	Insm1	chr2:146221996-146225018	25.9015	35.7814	0.466177	0.00025	0.0361456	yes
XLOC_017571	Myadm	chr7:3289037-3299349	12.4539	17.7146	0.508346	0.00025	0.0361456	yes
XLOC_005716	Rnf180	chr13:105147493-105293014	10.4505	7.27292	-0.522968	0.00025	0.0361456	yes
XLOC_011120	Thbs1	chr2:118111921-118127133	3.52979	5.29664	0.585494	0.00025	0.0361456	yes
XLOC_010857	Csrnp3	chr2:65845766-66031546	1.55961	2.50529	0.683787	0.0002	0.0312932	yes
XLOC_016203	Pom121	chr5:135369952-135394546	60.1919	81.0564	0.429356	0.0002	0.0312932	yes
XLOC_021409	Rpsa	chr9:120127765-120132369	90.3094	119.81	0.407801	0.0002	0.0312932	yes
XLOC_020389	Dlc1	chr8:36567738-36952442	1.69955	2.97854	0.809456	0.00015	0.0244757	yes
XLOC_020998	Rps25	chr9:44407713-44418007	122.815	171.752	0.483839	0.00015	0.0244757	yes
XLOC_007367	Tuba1b	chr15:98931430-98934390	125.115	174.1	0.476666	0.00015	0.0244757	yes
XLOC_001029	5730559C18Rik	chr1:136213521-136234280	12.9892	8.43287	-0.623219	0.0001	0.0170478	yes
XLOC_022105	Lancl3	chrX:9199972-9268085	6.06702	3.73976	-0.698042	0.0001	0.0170478	yes
XLOC_001009	Optc	chr1:133897193-133907999	1.99758	5.41979	1.43998	0.0001	0.0170478	yes
XLOC_020213	Rpl13	chr8:123102349-123105242	226.76	313.097	0.465445	0.0001	0.0170478	yes
XLOC_016680	Rpn1	chr6:88084472-88105304	14.971	21.3364	0.511149	0.0001	0.0170478	yes
XLOC_001888	Rps12	chr10:23785182-23787209	181.87	251.775	0.46923	0.0001	0.0170478	yes
XLOC_017641	Rps5	chr7:12922310-12926686	101.362	146.533	0.531704	0.0001	0.0170478	yes
XLOC_002731	Txndc17	chr11:72207553-72210487	6.28598	11.6892	0.894968	0.0001	0.0170478	yes
XLOC_020477	Uba52	chr8:70508265-70510367	183.845	255.498	0.474818	0.0001	0.0170478	yes
XLOC_009500	Apcdd1	chr18:62922326-62953195	9.62059	15.3605	0.675028	5e-05	0.00984655	yes
XLOC_019444	Arl6ip1	chr7:118118889-118129625	41.5559	60.7573	0.548004	5e-05	0.00984655	yes
XLOC_013654	C430048L16Rik	chr4:12089369-12096271	15.3774	10.5186	-0.547871	5e-05	0.00984655	yes
XLOC_020554	Calr	chr8:84842087-84846931	58.1648	83.6345	0.523952	5e-05	0.00984655	yes
XLOC_016371	Cav1	chr6:17306334-17341328	4.50084	7.89817	0.811323	5e-05	0.00984655	yes
XLOC_020281	Col4a1	chr8:11198422-11312826	2.22723	4.20603	0.917209	5e-05	0.00984655	yes
XLOC_019693	Col4a2	chr8:11312828-11449287	2.46009	4.53722	0.883098	5e-05	0.00984655	yes
XLOC_009365	Egr1	chr18:34861206-34864956	60.9758	85.6702	0.490555	5e-05	0.00984655	yes
XLOC_021917	Ephb1	chr9:101922127-102354693	5.94408	9.59351	0.690606	5e-05	0.00984655	yes
XLOC_012063	Ext2	chr2:93695630-93822568	18.9313	28.361	0.583136	5e-05	0.00984655	yes
XLOC_004317	Fos	chr12:85473900-85477270	24.2211	37.2327	0.620305	5e-05	0.00984655	yes
XLOC_018714	Fosb	chr7:19302695-19310045	33.3487	64.2677	0.946463	5e-05	0.00984655	yes
XLOC_013714	Gm3893	chr4:41889794-42462993	48.1312	32.0588	-0.586252	5e-05	0.00984655	yes
XLOC_019637	Igf2	chr7:142650767-142670356	2.61215	7.41847	1.50589	5e-05	0.00984655	yes
XLOC_023085	Kdm5d	chrY:897787-943811	26.3334	18.4859	-0.510466	5e-05	0.00984655	yes
XLOC_003944	Kpna2	chr11:106988628-106999525	113.058	158.703	0.489266	5e-05	0.00984655	yes
XLOC_007324	Nell2	chr15:95219449-95528706	7.50874	12.2027	0.700559	5e-05	0.00984655	yes
XLOC_004887	Nid1	chr13:13437601-13512275	0.847196	2.51643	1.57061	5e-05	0.00984655	yes
XLOC_003731	Nme2	chr11:93949814-93956007	41.2955	73.671	0.835113	5e-05	0.00984655	yes
XLOC_012765	Nup210l	chr3:90104131-90212017	3.92938	2.43419	-0.690861	5e-05	0.00984655	yes
XLOC_006307	Otx2	chr14:48658183-48662872	6.05118	12.2228	1.01429	5e-05	0.00984655	yes
XLOC_011163	Pdia3	chr2:121413901-121438686	42.8066	65.6014	0.615893	5e-05	0.00984655	yes
XLOC_004124	Pdia6	chr12:17266594-17324730	26.8811	40.8801	0.604808	5e-05	0.00984655	yes
XLOC_001010	Prelp	chr1:133910303-133921401	2.77917	5.07714	0.869364	5e-05	0.00984655	yes
XLOC_007227	Rpl3	chr15:80077780-80083406	134.376	186.216	0.4707	5e-05	0.00984655	yes
XLOC_007022	Rpl30	chr15:34440505-34443276	261.054	356.352	0.448955	5e-05	0.00984655	yes
XLOC_015441	Rplp0	chr5:115559466-115563729	77.2841	116.827	0.596126	5e-05	0.00984655	yes
XLOC_019161	Rps17	chr7:81342732-81345234	214.387	318.977	0.573238	5e-05	0.00984655	yes
XLOC_002309	Rps26	chr10:128624528-128626506	147.364	213.501	0.534863	5e-05	0.00984655	yes
XLOC_019234	Rps3	chr7:99477896-99483709	66.1886	90.9604	0.458657	5e-05	0.00984655	yes
XLOC_022902	Rps4x	chrX:102184942-102188371	175.76	248.514	0.499717	5e-05	0.00984655	yes
XLOC_014665	Rps8	chr4:117153835-117156132	187.283	261.103	0.479399	5e-05	0.00984655	yes
XLOC_017580	Rps9	chr7:3704040-3706897	207.042	284.922	0.460645	5e-05	0.00984655	yes
XLOC_014040	Rspo1	chr4:124986429-125009099	8.74742	16.2154	0.890437	5e-05	0.00984655	yes
XLOC_001910	Rspo3	chr10:29453106-29535867	6.298	12.1219	0.944652	5e-05	0.00984655	yes
XLOC_017141	Scrn1	chr6:54508815-54566382	61.5018	43.2795	-0.506945	5e-05	0.00984655	yes
XLOC_020722	Slc7a5	chr8:121881145-121907686	14.2146	25.2958	0.831523	5e-05	0.00984655	yes
XLOC_009367	Snhg4	chr18:35553409-35558316	20.5005	32.8707	0.681143	5e-05	0.00984655	yes
XLOC_016003	Sparcl1	chr5:104079108-104114088	0.678318	2.45965	1.85842	5e-05	0.00984655	yes
XLOC_014235	Srm	chr4:148591512-148594619	30.8994	48.5472	0.651807	5e-05	0.00984655	yes
XLOC_000007	St18	chr1:6487230-6860940	3.42176	5.15206	0.590412	5e-05	0.00984655	yes
XLOC_019789	Star	chr8:25808512-25815982	12.4514	8.10081	-0.620169	5e-05	0.00984655	yes
XLOC_000019	Sulf1	chr1:12692429-12860372	1.14698	2.49115	1.11897	5e-05	0.00984655	yes
XLOC_012445	Sulf2	chr2:166073898-166155683	13.2212	18.8952	0.515168	5e-05	0.00984655	yes
XLOC_010013	Trpm3	chr19:22139116-22989884	3.02138	5.67215	0.908691	5e-05	0.00984655	yes
XLOC_009325	Ttr	chr18:20665249-20674326	7.19618	15.2427	1.08282	5e-05	0.00984655	yes
XLOC_018387	Tufm	chr7:126487354-126490731	10.3298	17.72	0.778562	5e-05	0.00984655	yes
XLOC_010932	Ube2l6	chr2:84798827-84810003	34.9081	22.7616	-0.616958	5e-05	0.00984655	yes
XLOC_023128	Uty	chrY:1097143-1245738	9.15413	5.84761	-0.646577	5e-05	0.00984655	yes

## Sheet: MYC-OE FAC
Annotation Cluster 1	Enrichment Score: 14.144621000880674
Category	Term	Count	%	PValue	Genes	List Total	Pop Hits	Pop Total	Fold Enrichment	Bonferroni	Benjamini	FDR
KEGG_PATHWAY	mmu03010:Ribosome	20	19.4175	1.62011e-23	RPSA, RPL13, RPL27A, RPS9, RPS4X, RPS5, RPS8, RPS3, RPS25, RPS26, RPL30, RPS3A, RPS17, RPL9, RPLP0, RPS12, RPL3, RPL12, KPNA2, UBA52	47	89	5738	27.4349	9.23464e-22	9.23464e-22	1.60589e-20
GOTERM_MF_FAT	GO:0003735~structural constituent of ribosome	19	18.4466	1.45229e-19	RPSA, RPL13, RPL27A, RPS9, RPS4X, RPS5, RPS8, RPS3, RPS26, RPL30, RPS17, RPS3A, RPL9, RPLP0, RPS12, RPL3, RPL12, KPNA2, UBA52	75	151	13288	22.2933	2.43985e-17	2.43985e-17	1.76823e-16
SP_PIR_KEYWORDS	ribosomal protein	20	19.4175	2.02131e-19	RPSA, RPL13, RPL27A, RPS9, RPS4X, RPS5, RPS8, RPS3, RPS25, RPS26, RPL30, RPS3A, RPS17, RPL9, RPLP0, RPS12, RPL3, RPL12, KPNA2, UBA52	101	177	17854	19.9743	3.82028e-17	3.82028e-17	2.51002e-16
GOTERM_MF_FAT	GO:0005198~structural molecule activity	26	25.2427	6.44389e-19	RPSA, COL4A2, COL4A1, RPL13, NELL2, RPL27A, RPS9, RPS4X, RPS5, RPS8, RPS3, RPS26, RPL30, RPS3A, RPS17, RPL9, RPLP0, RPS12, RPL3, RPL12, TUBA1A, THBS1, TUBA1B, KPNA2, TUBA1C, UBA52	75	450	13288	10.2367	1.08257e-16	5.41286e-17	7.84572e-16
GOTERM_CC_FAT	GO:0005840~ribosome	20	19.4175	1.85749e-17	RPSA, RPL13, RPL27A, RPS9, RPS4X, RPS5, RPS8, RPS3, RPS25, RPS26, RPL30, RPS3A, RPS17, RPL9, RPLP0, RPS12, RPL3, RPL12, KPNA2, UBA52	85	192	12504	15.3235	2.63764e-15	2.63764e-15	2.1971e-14
SP_PIR_KEYWORDS	ribonucleoprotein	20	19.4175	4.34546e-16	RPSA, RPL13, RPL27A, RPS9, RPS4X, RPS5, RPS8, RPS3, RPS25, RPS26, RPL30, RPS3A, RPS17, RPL9, RPLP0, RPS12, RPL3, RPL12, KPNA2, UBA52	101	266	17854	13.2911	8.39329e-14	4.19664e-14	5.55112e-13
GOTERM_BP_FAT	GO:0006412~translation	21	20.3883	3.8922e-15	TUFM, RPSA, RPL13, RPL27A, RPS9, EIF5A, RPS4X, RPS5, RPS8, RPS3, RPS26, RPL30, RPS3A, RPS17, RPL9, RPLP0, RPS12, RPL3, RPL12, KPNA2, UBA52	85	319	13588	10.5236	2.87548e-12	2.87548e-12	5.90639e-12
GOTERM_CC_FAT	GO:0030529~ribonucleoprotein complex	24	23.301	2.06419e-14	RPSA, NOC4L, RPL13, RPL27A, RPS9, CALR, RPS4X, RPS5, SF3B4, RPS8, RPS3, RPS25, RPS26, RPL30, RPS3A, RPS17, RPL9, RPLP0, RPS12, RPL3, RPL12, PES1, KPNA2, UBA52	85	462	12504	7.64186	2.93232e-12	1.46616e-12	2.44249e-11
SP_PIR_KEYWORDS	ribosome	8	7.76699	3.18281e-11	RPL30, RPLP0, RPL27A, RPS12, RPL12, RPS8, UBA52, RPS3	101	23	17854	61.486	6.01551e-09	2.00517e-09	3.95235e-08
SP_PIR_KEYWORDS	acetylation	39	37.8641	2.54335e-10	TUFM, 2810004N23RIK, CAV1, SRM, RPL13, RPL27A, EIF5A, CALR, SF3B4, MIF, RPS3, RPS25, RPS26, RPL30, RPS3A, PELP1, RPL9, RPLP0, RPN1, RPL3, RPL12, TUBA1C, NUDC, PLEC, RPSA, SUCLG1, RPS9, RPS4X, RPS5, NME2, TXNDC17, RPS17, RPS12, ALDH2, TOMM22, PES1, COMMD6, KPNA2, UBA52	101	2325	17854	2.96521	4.80693e-08	1.20173e-08	3.15828e-07
GOTERM_CC_FAT	GO:0043232~intracellular non-membrane-bounded organelle	31	30.0971	3.38081e-06	RPL13, RPL27A, RPS3, RPS25, SLC1A4, RPS26, CDCA8, RPL30, RPS3A, RPL9, RPLP0, RPL3, RPL12, TUBA1A, TUBA1B, NUDC, TUBA1C, PLEC, RPSA, RRP12, NOC4L, RPS9, RPS4X, RPS5, RPS8, RPS17, RPS12, SETD8, PES1, KPNA2, UBA52	85	1919	12504	2.37638	0.000479961	0.000120012	0.00399888
GOTERM_CC_FAT	GO:0043228~non-membrane-bounded organelle	31	30.0971	3.38081e-06	RPL13, RPL27A, RPS3, RPS25, SLC1A4, RPS26, CDCA8, RPL30, RPS3A, RPL9, RPLP0, RPL3, RPL12, TUBA1A, TUBA1B, NUDC, TUBA1C, PLEC, RPSA, RRP12, NOC4L, RPS9, RPS4X, RPS5, RPS8, RPS17, RPS12, SETD8, PES1, KPNA2, UBA52	85	1919	12504	2.37638	0.000479961	0.000120012	0.00399888
Annotation Cluster 2	Enrichment Score: 3.3749397966277863
Category	Term	Count	%	PValue	Genes	List Total	Pop Hits	Pop Total	Fold Enrichment	Bonferroni	Benjamini	FDR
GOTERM_CC_FAT	GO:0033279~ribosomal subunit	7	6.79612	5.05109e-06	RPSA, RPS17, RPL9, RPS9, RPS4X, RPS5, RPS3	85	66	12504	15.6021	0.000717	0.000143441	0.00597445
GOTERM_CC_FAT	GO:0022626~cytosolic ribosome	4	3.8835	0.000221893	RPS17, RPL9, RPL27A, RPS5	85	18	12504	32.6902	0.0310209	0.00449163	0.262147
GOTERM_CC_FAT	GO:0044445~cytosolic part	3	2.91262	0.0669349	RPS17, RPL9, RPS5	85	63	12504	7.00504	0.999947	0.336289	55.9336
Annotation Cluster 3	Enrichment Score: 2.701331819183674
Category	Term	Count	%	PValue	Genes	List Total	Pop Hits	Pop Total	Fold Enrichment	Bonferroni	Benjamini	FDR
SP_PIR_KEYWORDS	endoplasmic reticulum	13	12.6214	0.000403388	PDIA3, GUSB, PDIA6, PIGT, EIF5A, TMED9, CALR, SERPINH1, POM121, SULF2, SULF1, RPN1, EXT2	101	678	17854	3.38944	0.0734208	0.00843707	0.499767
UP_SEQ_FEATURE	short sequence motif:Prevents secretion from ER	5	4.85437	0.00046299	PDIA3, PDIA6, CALR, TMED9, SERPINH1	99	59	16021	13.7143	0.173316	0.0907784	0.646382
GOTERM_CC_FAT	GO:0044432~endoplasmic reticulum part	8	7.76699	0.00090849	ARL6IP1, PDIA3, RPN1, PIGT, PDIA6, CALR, SERPINH1, EXT2	85	231	12504	5.09458	0.121082	0.0160036	1.06932
GOTERM_CC_FAT	GO:0005783~endoplasmic reticulum	15	14.5631	0.00129154	ARL6IP1, CAV1, PDIA3, GUSB, PIGT, PDIA6, EIF5A, TMED9, CALR, SERPINH1, POM121, SULF2, SULF1, RPN1, EXT2	85	838	12504	2.63316	0.167662	0.0201843	1.51704
GOTERM_CC_FAT	GO:0005788~endoplasmic reticulum lumen	4	3.8835	0.0125037	PDIA3, PDIA6, CALR, SERPINH1	85	72	12504	8.17255	0.832491	0.105661	13.8285
INTERPRO	IPR000886:Endoplasmic reticulum, targeting sequence	3	2.91262	0.0226073	PDIA6, CALR, SERPINH1	97	43	17763	12.7761	0.997769	0.398775	25.9281
Annotation Cluster 4	Enrichment Score: 2.5545777715250786
Category	Term	Count	%	PValue	Genes	List Total	Pop Hits	Pop Total	Fold Enrichment	Bonferroni	Benjamini	FDR
SP_PIR_KEYWORDS	extracellular matrix	8	7.76699	0.000195168	OPTC, WNT5A, COL4A2, COL4A1, SPARCL1, NID1, SPARC, PRELP	101	213	17854	6.63933	0.0362182	0.00460068	0.242086
SP_PIR_KEYWORDS	basement membrane	4	3.8835	0.000899353	COL4A2, COL4A1, NID1, SPARC	101	34	17854	20.7967	0.156381	0.0153406	1.11108
SP_PIR_KEYWORDS	cell binding	3	2.91262	0.00135732	COL4A2, COL4A1, NID1	101	10	17854	53.0317	0.226405	0.0211651	1.67249
GOTERM_CC_FAT	GO:0005578~proteinaceous extracellular matrix	8	7.76699	0.00378001	OPTC, WNT5A, COL4A2, COL4A1, SPARCL1, NID1, SPARC, PRELP	85	297	12504	3.96245	0.415956	0.0438256	4.38075
GOTERM_CC_FAT	GO:0031012~extracellular matrix	8	7.76699	0.00469045	OPTC, WNT5A, COL4A2, COL4A1, SPARCL1, NID1, SPARC, PRELP	85	309	12504	3.80857	0.487067	0.0500583	5.40928
GOTERM_CC_FAT	GO:0005604~basement membrane	4	3.8835	0.0129774	COL4A2, COL4A1, NID1, SPARC	85	73	12504	8.0606	0.843524	0.103367	14.3162
GOTERM_CC_FAT	GO:0044420~extracellular matrix part	4	3.8835	0.0239353	COL4A2, COL4A1, NID1, SPARC	85	92	12504	6.39591	0.96794	0.165615	24.9157
Annotation Cluster 5	Enrichment Score: 2.281743236197747
Category	Term	Count	%	PValue	Genes	List Total	Pop Hits	Pop Total	Fold Enrichment	Bonferroni	Benjamini	FDR
GOTERM_CC_FAT	GO:0044421~extracellular region part	17	16.5049	4.80474e-05	WNT5A, OPTC, COL4A2, COL4A1, SPARCL1, IGF2, NID1, SPARC, CALR, MIF, PRELP, TTR, DKK3, SULF2, RSPO1, SULF1, THBS1	85	774	12504	3.23101	0.00679967	0.0011365	0.0568174
SP_PIR_KEYWORDS	signal	33	32.0388	0.000113846	TMX2, WNT5A, PDIA3, NELL2, PDIA6, CALR, APCDD1, SERPINH1, EPHB1, TTR, RSPO1, RSPO3, 2310044H10RIK, RPN1, TMED10, THBS1, CYR61, OPTC, COL4A2, COL4A1, SPARCL1, GUSB, PIGT, IGF2, NID1, SPARC, TMED9, PRELP, DKK3, SDC1, SULF2, SFRP2, SULF1	101	2970	17854	1.96414	0.0212883	0.00357993	0.14128
UP_SEQ_FEATURE	signal peptide	33	32.0388	0.00054464	TMX2, WNT5A, PDIA3, NELL2, PDIA6, CALR, APCDD1, SERPINH1, EPHB1, TTR, RSPO1, RSPO3, 2310044H10RIK, RPN1, TMED10, THBS1, CYR61, OPTC, COL4A2, COL4A1, SPARCL1, GUSB, PIGT, IGF2, NID1, SPARC, TMED9, PRELP, DKK3, SDC1, SULF2, SFRP2, SULF1	99	2963	16021	1.80234	0.200611	0.0719188	0.759971
SP_PIR_KEYWORDS	Secreted	18	17.4757	0.00219905	WNT5A, OPTC, COL4A2, COL4A1, SPARCL1, NELL2, IGF2, NID1, SPARC, MIF, PRELP, TTR, DKK3, RSPO1, SFRP2, RSPO3, 2310044H10RIK, CYR61	101	1420	17854	2.24078	0.340372	0.0314993	2.69672
GOTERM_CC_FAT	GO:0005576~extracellular region	21	20.3883	0.00685395	WNT5A, OPTC, COL4A2, COL4A1, SPARCL1, NELL2, IGF2, NID1, SPARC, CALR, MIF, PRELP, DKK3, TTR, SULF2, RSPO1, SFRP2, RSPO3, SULF1, THBS1, CYR61	85	1680	12504	1.83882	0.623415	0.0673805	7.81291
GOTERM_CC_FAT	GO:0005615~extracellular space	9	8.73786	0.0212115	DKK3, TTR, RSPO1, SULF2, SULF1, IGF2, CALR, THBS1, MIF	85	511	12504	2.59091	0.952377	0.155606	22.3995
SP_PIR_KEYWORDS	glycoprotein	29	28.1553	0.0370888	WNT5A, NELL2, APCDD1, SLC7A5, SERPINH1, EPHB1, SLC29A1, SLC1A4, TTR, RSPO1, RSPO3, RPN1, THBS1, OPTC, COL4A2, COL4A1, SPARCL1, GUSB, PIGT, NID1, SPARC, TMED9, PRELP, DKK3, SDC1, SLC17A6, SULF2, SULF1, EXT2	101	3600	17854	1.424	0.99921	0.288334	37.4572
SP_PIR_KEYWORDS	disulfide bond	21	20.3883	0.0548562	OPTC, COL4A2, COL4A1, PDIA3, SPARCL1, NELL2, PIGT, PDIA6, IGF2, NID1, SPARC, CALR, SLC7A5, PRELP, DKK3, RSPO1, TXNDC17, SFRP2, RSPO3, THBS1, CYR61	101	2469	17854	1.50353	0.999977	0.358723	50.3707
UP_SEQ_FEATURE	glycosylation site:N-linked (GlcNAc...)	29	28.1553	0.0597009	WNT5A, NELL2, APCDD1, SLC7A5, SERPINH1, EPHB1, SLC29A1, SLC1A4, TTR, RSPO1, RSPO3, RPN1, THBS1, OPTC, COL4A2, COL4A1, SPARCL1, GUSB, PIGT, NID1, SPARC, TMED9, PRELP, DKK3, SDC1, SLC17A6, SULF2, SULF1, EXT2	99	3444	16021	1.36267	1	0.973064	57.7681
UP_SEQ_FEATURE	disulfide bond	20	19.4175	0.131605	OPTC, COL4A2, COL4A1, PDIA3, SPARCL1, NELL2, PIGT, PDIA6, IGF2, NID1, SPARC, CALR, PRELP, DKK3, RSPO1, TXNDC17, SFRP2, RSPO3, THBS1, CYR61	99	2379	16021	1.36047	1	0.996971	86.1372
Annotation Cluster 6	Enrichment Score: 1.940647211703272
Category	Term	Count	%	PValue	Genes	List Total	Pop Hits	Pop Total	Fold Enrichment	Bonferroni	Benjamini	FDR
SMART	SM00209:TSP1	4	3.8835	0.00184097	RSPO1, RSPO3, THBS1, CYR61	39	59	9131	15.8731	0.0896954	0.0896954	1.7668
SP_PIR_KEYWORDS	heparin-binding	4	3.8835	0.00326029	RSPO1, RSPO3, THBS1, CYR61	101	53	17854	13.3413	0.460548	0.0403117	3.97405
INTERPRO	IPR000884:Thrombospondin, type 1 repeat	4	3.8835	0.00399517	RSPO1, RSPO3, THBS1, CYR61	97	59	17763	12.4152	0.656596	0.234489	5.11865
UP_SEQ_FEATURE	domain:TSP type-1	3	2.91262	0.004203	RSPO1, RSPO3, CYR61	99	16	16021	30.3428	0.822906	0.292639	5.72735
GOTERM_MF_FAT	GO:0008201~heparin binding	4	3.8835	0.0110786	RSPO1, RSPO3, THBS1, CYR61	75	83	13288	8.53847	0.846122	0.267969	12.6843
GOTERM_MF_FAT	GO:0005539~glycosaminoglycan binding	4	3.8835	0.0256676	RSPO1, RSPO3, THBS1, CYR61	75	114	13288	6.21661	0.987329	0.420772	27.1375
GOTERM_MF_FAT	GO:0030247~polysaccharide binding	4	3.8835	0.0344985	RSPO1, RSPO3, THBS1, CYR61	75	128	13288	5.53667	0.997255	0.415027	34.7831
GOTERM_MF_FAT	GO:0001871~pattern binding	4	3.8835	0.0344985	RSPO1, RSPO3, THBS1, CYR61	75	128	13288	5.53667	0.997255	0.415027	34.7831
GOTERM_MF_FAT	GO:0030246~carbohydrate binding	5	4.85437	0.100301	RSPO1, RSPO3, CALR, THBS1, CYR61	75	317	13288	2.79453	1	0.693882	72.3871
Annotation Cluster 7	Enrichment Score: 1.8969317739742484
Category	Term	Count	%	PValue	Genes	List Total	Pop Hits	Pop Total	Fold Enrichment	Bonferroni	Benjamini	FDR
UP_SEQ_FEATURE	cross-link:Glycyl lysine isopeptide (Lys-Gly) (interchain with G-Cter in ubiquitin)	6	5.82524	0.00370247	FOS, SUCLG1, TMBIM6, TUBA1B, UBA52, RPS3	99	168	16021	5.77958	0.782279	0.316914	5.06164
SP_PIR_KEYWORDS	isopeptide bond	6	5.82524	0.0197896	FOS, SUCLG1, TMBIM6, TUBA1B, UBA52, RPS3	101	277	17854	3.829	0.977126	0.199261	21.9802
SP_PIR_KEYWORDS	ubl conjugation	8	7.76699	0.0278147	FOS, CDCA8, SUCLG1, TMBIM6, PES1, TUBA1B, UBA52, RPS3	101	524	17854	2.69881	0.995163	0.244673	29.5518
Annotation Cluster 8	Enrichment Score: 1.8471536352271614
Category	Term	Count	%	PValue	Genes	List Total	Pop Hits	Pop Total	Fold Enrichment	Bonferroni	Benjamini	FDR
GOTERM_MF_FAT	GO:0016862~intramolecular oxidoreductase activity, interconverting keto- and enol-groups	3	2.91262	0.00107394	PDIA3, PDIA6, MIF	75	9	13288	59.0578	0.165163	0.0441266	1.29975
GOTERM_MF_FAT	GO:0016860~intramolecular oxidoreductase activity	3	2.91262	0.0188988	PDIA3, PDIA6, MIF	75	38	13288	13.9874	0.959457	0.367397	20.7295
SP_PIR_KEYWORDS	Isomerase	3	2.91262	0.14162	PDIA3, PDIA6, MIF	101	118	17854	4.49421	1	0.617895	84.9877
Annotation Cluster 9	Enrichment Score: 1.774846536360613
Category	Term	Count	%	PValue	Genes	List Total	Pop Hits	Pop Total	Fold Enrichment	Bonferroni	Benjamini	FDR
GOTERM_CC_FAT	GO:0044432~endoplasmic reticulum part	8	7.76699	0.00090849	ARL6IP1, PDIA3, RPN1, PIGT, PDIA6, CALR, SERPINH1, EXT2	85	231	12504	5.09458	0.121082	0.0160036	1.06932
GOTERM_CC_FAT	GO:0048770~pigment granule	5	4.85437	0.00253865	SLC1A4, PDIA3, RPN1, TMED10, PDIA6	85	85	12504	8.65329	0.302984	0.0354511	2.96188
GOTERM_CC_FAT	GO:0042470~melanosome	5	4.85437	0.00253865	SLC1A4, PDIA3, RPN1, TMED10, PDIA6	85	85	12504	8.65329	0.302984	0.0354511	2.96188
GOTERM_CC_FAT	GO:0016023~cytoplasmic membrane-bounded vesicle	7	6.79612	0.059638	SLC1A4, SLC17A6, PDIA3, RPN1, TMED10, PIGT, PDIA6	85	414	12504	2.4873	0.999839	0.340183	51.6803
GOTERM_CC_FAT	GO:0031988~membrane-bounded vesicle	7	6.79612	0.0630538	SLC1A4, SLC17A6, PDIA3, RPN1, TMED10, PIGT, PDIA6	85	420	12504	2.45176	0.999904	0.343204	53.716
GOTERM_CC_FAT	GO:0031410~cytoplasmic vesicle	7	6.79612	0.12614	SLC1A4, SLC17A6, PDIA3, RPN1, TMED10, PIGT, PDIA6	85	508	12504	2.02705	1	0.483265	79.7066
GOTERM_CC_FAT	GO:0031982~vesicle	7	6.79612	0.135663	SLC1A4, SLC17A6, PDIA3, RPN1, TMED10, PIGT, PDIA6	85	519	12504	1.98409	1	0.498466	82.1735
Annotation Cluster 10	Enrichment Score: 1.7530106735310231
Category	Term	Count	%	PValue	Genes	List Total	Pop Hits	Pop Total	Fold Enrichment	Bonferroni	Benjamini	FDR
INTERPRO	IPR017937:Thioredoxin, conserved site	4	3.8835	0.000322748	TMX2, PDIA3, TXNDC17, PDIA6	97	25	17763	29.2998	0.082578	0.082578	0.42279
GOTERM_BP_FAT	GO:0045454~cell redox homeostasis	4	3.8835	0.00662993	TMX2, PDIA3, TXNDC17, PDIA6	85	62	13588	10.3135	0.992719	0.707889	9.61233
INTERPRO	IPR013766:Thioredoxin domain	3	2.91262	0.00863376	TMX2, PDIA3, PDIA6	97	26	17763	21.1297	0.901256	0.25129	10.7575
INTERPRO	IPR017936:Thioredoxin-like	3	2.91262	0.0161616	TMX2, PDIA3, PDIA6	97	36	17763	15.2603	0.987098	0.383303	19.2538
INTERPRO	IPR012335:Thioredoxin fold	4	3.8835	0.0197717	TMX2, PDIA3, TXNDC17, PDIA6	97	106	17763	6.91033	0.995165	0.413272	23.0574
SP_PIR_KEYWORDS	Redox-active center	3	2.91262	0.0201159	PDIA3, TXNDC17, PDIA6	101	39	17854	13.5979	0.978521	0.192143	22.3021
GOTERM_BP_FAT	GO:0019725~cellular homeostasis	5	4.85437	0.162523	TMX2, CAV1, PDIA3, TXNDC17, PDIA6	85	343	13588	2.3303	1	0.992257	93.2432
GOTERM_BP_FAT	GO:0042592~homeostatic process	5	4.85437	0.490182	TMX2, CAV1, PDIA3, TXNDC17, PDIA6	85	584	13588	1.36865	1	0.998814	99.9964
Annotation Cluster 11	Enrichment Score: 1.5603985033402394
Category	Term	Count	%	PValue	Genes	List Total	Pop Hits	Pop Total	Fold Enrichment	Bonferroni	Benjamini	FDR
GOTERM_BP_FAT	GO:0016055~Wnt receptor signaling pathway	6	5.82524	0.0012521	WNT5A, DKK3, SDC1, RSPO1, SFRP2, RSPO3	85	130	13588	7.3781	0.604314	0.370964	1.88547
GOTERM_BP_FAT	GO:0060070~Wnt receptor signaling pathway through beta-catenin	3	2.91262	0.00428368	SDC1, RSPO1, RSPO3	85	16	13588	29.9735	0.958278	0.653167	6.31394
SP_PIR_KEYWORDS	wnt signaling pathway	5	4.85437	0.00436597	WNT5A, DKK3, RSPO1, SFRP2, RSPO3	101	118	17854	7.49035	0.56263	0.050373	5.28847
SP_PIR_KEYWORDS	developmental protein	5	4.85437	0.674331	WNT5A, DKK3, SFRP2, OTX2, SLC7A5	101	814	17854	1.08582	1	0.991925	99.9999
GOTERM_BP_FAT	GO:0007166~cell surface receptor linked signal transduction	7	6.79612	0.999073	WNT5A, DKK3, SDC1, RSPO1, SFRP2, RSPO3, EPHB1	85	2495	13588	0.448502	1	1	100
Annotation Cluster 12	Enrichment Score: 1.4825190618855586
Category	Term	Count	%	PValue	Genes	List Total	Pop Hits	Pop Total	Fold Enrichment	Bonferroni	Benjamini	FDR
GOTERM_MF_FAT	GO:0050840~extracellular matrix binding	5	4.85437	1.02591e-05	RPSA, NID1, SPARC, THBS1, CYR61	75	25	13288	35.4347	0.00172205	0.000574348	0.0124902
GOTERM_BP_FAT	GO:0010811~positive regulation of cell-substrate adhesion	3	2.91262	0.0119908	NID1, THBS1, CYR61	85	27	13588	17.7621	0.999867	0.774132	16.7461
GOTERM_BP_FAT	GO:0010810~regulation of cell-substrate adhesion	3	2.91262	0.0253045	NID1, THBS1, CYR61	85	40	13588	11.9894	1	0.933428	32.2532
GOTERM_BP_FAT	GO:0045785~positive regulation of cell adhesion	3	2.91262	0.0289489	NID1, THBS1, CYR61	85	43	13588	11.1529	1	0.933947	36.0011
GOTERM_BP_FAT	GO:0030155~regulation of cell adhesion	3	2.91262	0.114811	NID1, THBS1, CYR61	85	94	13588	5.10188	1	0.989027	84.3206
GOTERM_BP_FAT	GO:0007155~cell adhesion	5	4.85437	0.458884	DLC1, NELL2, NID1, THBS1, CYR61	85	561	13588	1.42477	1	0.998978	99.9911
GOTERM_BP_FAT	GO:0022610~biological adhesion	5	4.85437	0.460258	DLC1, NELL2, NID1, THBS1, CYR61	85	562	13588	1.42223	1	0.998782	99.9915
SP_PIR_KEYWORDS	cell adhesion	3	2.91262	0.631497	NID1, THBS1, CYR61	101	380	17854	1.39557	1	0.988806	99.9996
Annotation Cluster 13	Enrichment Score: 1.255026018120133
Category	Term	Count	%	PValue	Genes	List Total	Pop Hits	Pop Total	Fold Enrichment	Bonferroni	Benjamini	FDR
GOTERM_CC_FAT	GO:0012505~endomembrane system	11	10.6796	0.00303158	ARL6IP1, NXT1, CAV1, POM121, SLC17A6, RPN1, TMED10, EIF5A, PIGT, KPNA2, EXT2	85	535	12504	3.02461	0.350231	0.0384363	3.52759
GOTERM_CC_FAT	GO:0005789~endoplasmic reticulum membrane	4	3.8835	0.0824703	ARL6IP1, RPN1, PIGT, EXT2	85	152	12504	3.87121	0.999995	0.386687	63.8709
GOTERM_CC_FAT	GO:0031090~organelle membrane	10	9.70874	0.0923766	ARL6IP1, TUFM, CAV1, SLC17A6, SUCLG1, RPN1, TMED10, PIGT, TOMM22, EXT2	85	809	12504	1.81837	0.999999	0.399359	68.2244
GOTERM_CC_FAT	GO:0042175~nuclear envelope-endoplasmic reticulum network	4	3.8835	0.0927687	ARL6IP1, RPN1, PIGT, EXT2	85	160	12504	3.67765	0.999999	0.389663	68.3864
UP_SEQ_FEATURE	topological domain:Lumenal	5	4.85437	0.247708	RPN1, TMED10, PIGT, TMED9, EXT2	99	414	16021	1.95445	1	0.999942	98.1421
Annotation Cluster 14	Enrichment Score: 1.149870436873347
Category	Term	Count	%	PValue	Genes	List Total	Pop Hits	Pop Total	Fold Enrichment	Bonferroni	Benjamini	FDR
UP_SEQ_FEATURE	site:Involved in polymerization	3	2.91262	0.000220455	TUBA1A, TUBA1B, TUBA1C	99	4	16021	121.371	0.0866326	0.0866326	0.308264
INTERPRO	IPR002452:Alpha tubulin	3	2.91262	0.000792399	TUBA1A, TUBA1B, TUBA1C	97	8	17763	68.6714	0.190756	0.10042	1.03507
INTERPRO	IPR018316:Tubulin/FtsZ, 2-layer sandwich domain	3	2.91262	0.00465555	TUBA1A, TUBA1B, TUBA1C	97	19	17763	28.9143	0.712328	0.220566	5.94104
INTERPRO	IPR003008:Tubulin/FtsZ, GTPase domain	3	2.91262	0.00515471	TUBA1A, TUBA1B, TUBA1C	97	20	17763	27.4686	0.748388	0.205449	6.55828
INTERPRO	IPR000217:Tubulin	3	2.91262	0.00515471	TUBA1A, TUBA1B, TUBA1C	97	20	17763	27.4686	0.748388	0.205449	6.55828
INTERPRO	IPR017975:Tubulin, conserved site	3	2.91262	0.0073836	TUBA1A, TUBA1B, TUBA1C	97	24	17763	22.8905	0.861756	0.246236	9.26906
PIR_SUPERFAMILY	PIRSF002306:tubulin	3	2.91262	0.0128897	TUBA1A, TUBA1B, TUBA1C	72	20	8136	16.95	0.676545	0.676545	13.0826
GOTERM_BP_FAT	GO:0051258~protein polymerization	3	2.91262	0.0253045	TUBA1A, TUBA1B, TUBA1C	85	40	13588	11.9894	1	0.933428	32.2532
GOTERM_BP_FAT	GO:0043623~cellular protein complex assembly	4	3.8835	0.0292475	TUBA1A, CALR, TUBA1B, TUBA1C	85	108	13588	5.9207	1	0.912897	36.2995
SP_PIR_KEYWORDS	gtp-binding	6	5.82524	0.0313424	TUFM, ARL10, SUCLG1, TUBA1A, TUBA1B, TUBA1C	101	313	17854	3.38861	0.997567	0.259868	32.6612
GOTERM_MF_FAT	GO:0003924~GTPase activity	4	3.8835	0.0344985	TUFM, TUBA1A, TUBA1B, TUBA1C	75	128	13288	5.53667	0.997255	0.415027	34.7831
GOTERM_MF_FAT	GO:0005525~GTP binding	6	5.82524	0.047223	TUFM, ARL10, SUCLG1, TUBA1A, TUBA1B, TUBA1C	75	354	13288	3.00294	0.999705	0.491984	44.5107
GOTERM_MF_FAT	GO:0032561~guanyl ribonucleotide binding	6	5.82524	0.0515879	TUFM, ARL10, SUCLG1, TUBA1A, TUBA1B, TUBA1C	75	363	13288	2.92848	0.999863	0.470379	47.5278
GOTERM_MF_FAT	GO:0019001~guanyl nucleotide binding	6	5.82524	0.0515879	TUFM, ARL10, SUCLG1, TUBA1A, TUBA1B, TUBA1C	75	363	13288	2.92848	0.999863	0.470379	47.5278
GOTERM_BP_FAT	GO:0006461~protein complex assembly	5	4.85437	0.0520153	CAV1, TUBA1A, CALR, TUBA1B, TUBA1C	85	227	13588	3.52112	1	0.9808	55.5832
GOTERM_BP_FAT	GO:0070271~protein complex biogenesis	5	4.85437	0.0520153	CAV1, TUBA1A, CALR, TUBA1B, TUBA1C	85	227	13588	3.52112	1	0.9808	55.5832
UP_SEQ_FEATURE	nucleotide phosphate-binding region:GTP	5	4.85437	0.0873546	TUFM, ARL10, TUBA1A, TUBA1B, TUBA1C	99	274	16021	2.95307	1	0.984614	72.1961
SP_PIR_KEYWORDS	microtubule	4	3.8835	0.12727	TUBA1A, TUBA1B, NUDC, TUBA1C	101	221	17854	3.1995	1	0.601029	81.5557
GOTERM_BP_FAT	GO:0007018~microtubule-based movement	3	2.91262	0.129119	TUBA1A, TUBA1B, TUBA1C	85	101	13588	4.74828	1	0.988299	87.7593
GOTERM_BP_FAT	GO:0034622~cellular macromolecular complex assembly	4	3.8835	0.15079	TUBA1A, CALR, TUBA1B, TUBA1C	85	217	13588	2.94671	1	0.992078	91.6528
KEGG_PATHWAY	mmu04540:Gap junction	3	2.91262	0.15086	TUBA1A, TUBA1B, TUBA1C	47	86	5738	4.25878	0.999911	0.955269	80.229
GOTERM_BP_FAT	GO:0065003~macromolecular complex assembly	5	4.85437	0.156645	CAV1, TUBA1A, CALR, TUBA1B, TUBA1C	85	338	13588	2.36478	1	0.992163	92.4856
GOTERM_BP_FAT	GO:0043933~macromolecular complex subunit organization	5	4.85437	0.191812	CAV1, TUBA1A, CALR, TUBA1B, TUBA1C	85	367	13588	2.17791	1	0.993802	96.0658
GOTERM_BP_FAT	GO:0034621~cellular macromolecular complex subunit organization	4	3.8835	0.193295	TUBA1A, CALR, TUBA1B, TUBA1C	85	245	13588	2.60994	1	0.993037	96.174
GOTERM_CC_FAT	GO:0005874~microtubule	4	3.8835	0.218473	TUBA1A, TUBA1B, NUDC, TUBA1C	85	240	12504	2.45176	1	0.621798	94.5837
GOTERM_CC_FAT	GO:0015630~microtubule cytoskeleton	5	4.85437	0.357988	CDCA8, TUBA1A, TUBA1B, NUDC, TUBA1C	85	450	12504	1.63451	1	0.760729	99.4709
GOTERM_BP_FAT	GO:0007017~microtubule-based process	3	2.91262	0.37589	TUBA1A, TUBA1B, TUBA1C	85	211	13588	2.27287	1	0.999191	99.9225
GOTERM_CC_FAT	GO:0044430~cytoskeletal part	6	5.82524	0.600937	SLC1A4, CDCA8, TUBA1A, TUBA1B, NUDC, TUBA1C	85	774	12504	1.14036	1	0.941328	99.9981
GOTERM_CC_FAT	GO:0005856~cytoskeleton	7	6.79612	0.776378	SLC1A4, CDCA8, TUBA1A, TUBA1B, NUDC, TUBA1C, PLEC	85	1122	12504	0.917773	1	0.980526	100
SP_PIR_KEYWORDS	nucleotide-binding	8	7.76699	0.818969	TUFM, NME2, ARL10, SUCLG1, TUBA1A, TUBA1B, EPHB1, TUBA1C	101	1631	17854	0.867062	1	0.998629	100
GOTERM_MF_FAT	GO:0032555~purine ribonucleotide binding	8	7.76699	0.888367	TUFM, NME2, ARL10, SUCLG1, TUBA1A, TUBA1B, EPHB1, TUBA1C	75	1796	13288	0.789191	1	1	100
GOTERM_MF_FAT	GO:0032553~ribonucleotide binding	8	7.76699	0.888367	TUFM, NME2, ARL10, SUCLG1, TUBA1A, TUBA1B, EPHB1, TUBA1C	75	1796	13288	0.789191	1	1	100
GOTERM_MF_FAT	GO:0017076~purine nucleotide binding	8	7.76699	0.911796	TUFM, NME2, ARL10, SUCLG1, TUBA1A, TUBA1B, EPHB1, TUBA1C	75	1871	13288	0.757556	1	1	100
GOTERM_MF_FAT	GO:0000166~nucleotide binding	9	8.73786	0.935363	TUFM, NME2, ARL10, SUCLG1, TUBA1A, SF3B4, TUBA1B, EPHB1, TUBA1C	75	2183	13288	0.730444	1	1	100
Annotation Cluster 15	Enrichment Score: 1.0670577751608503
Category	Term	Count	%	PValue	Genes	List Total	Pop Hits	Pop Total	Fold Enrichment	Bonferroni	Benjamini	FDR
GOTERM_CC_FAT	GO:0012505~endomembrane system	11	10.6796	0.00303158	ARL6IP1, NXT1, CAV1, POM121, SLC17A6, RPN1, TMED10, EIF5A, PIGT, KPNA2, EXT2	85	535	12504	3.02461	0.350231	0.0384363	3.52759
GOTERM_CC_FAT	GO:0005643~nuclear pore	4	3.8835	0.00725332	NXT1, POM121, EIF5A, KPNA2	85	59	12504	9.97328	0.644321	0.066594	8.25044
GOTERM_BP_FAT	GO:0015931~nucleobase, nucleoside, nucleotide and nucleic acid transport	4	3.8835	0.0107782	NXT1, SLC29A1, POM121, EIF5A	85	74	13588	8.64102	0.999671	0.798877	15.1801
GOTERM_CC_FAT	GO:0046930~pore complex	4	3.8835	0.0129774	NXT1, POM121, EIF5A, KPNA2	85	73	12504	8.0606	0.843524	0.103367	14.3162
SP_PIR_KEYWORDS	mRNA transport	3	2.91262	0.0445583	NXT1, POM121, EIF5A	101	60	17854	8.83861	0.999819	0.324016	43.222
SP_PIR_KEYWORDS	translocation	3	2.91262	0.0514354	POM121, EIF5A, TOMM22	101	65	17854	8.15872	0.999954	0.352038	48.0935
GOTERM_BP_FAT	GO:0051028~mRNA transport	3	2.91262	0.0562519	NXT1, POM121, EIF5A	85	62	13588	7.7351	1	0.971851	58.5052
GOTERM_BP_FAT	GO:0051236~establishment of RNA localization	3	2.91262	0.062816	NXT1, POM121, EIF5A	85	66	13588	7.26631	1	0.975101	62.68
GOTERM_BP_FAT	GO:0050658~RNA transport	3	2.91262	0.062816	NXT1, POM121, EIF5A	85	66	13588	7.26631	1	0.975101	62.68
GOTERM_BP_FAT	GO:0050657~nucleic acid transport	3	2.91262	0.062816	NXT1, POM121, EIF5A	85	66	13588	7.26631	1	0.975101	62.68
GOTERM_BP_FAT	GO:0006403~RNA localization	3	2.91262	0.064496	NXT1, POM121, EIF5A	85	67	13588	7.15786	1	0.970518	63.6836
GOTERM_CC_FAT	GO:0005635~nuclear envelope	4	3.8835	0.0837289	NXT1, POM121, EIF5A, KPNA2	85	153	12504	3.84591	0.999996	0.379713	64.4527
SP_PIR_KEYWORDS	protein transport	6	5.82524	0.116868	NXT1, POM121, TMED10, EIF5A, TOMM22, KPNA2	101	461	17854	2.30072	1	0.581035	78.6324
GOTERM_CC_FAT	GO:0031967~organelle envelope	7	6.79612	0.154767	TUFM, NXT1, POM121, SUCLG1, EIF5A, TOMM22, KPNA2	85	540	12504	1.90693	1	0.525803	86.3147
GOTERM_CC_FAT	GO:0031975~envelope	7	6.79612	0.156647	TUFM, NXT1, POM121, SUCLG1, EIF5A, TOMM22, KPNA2	85	542	12504	1.89989	1	0.509114	86.6705
GOTERM_BP_FAT	GO:0008104~protein localization	8	7.76699	0.183461	ARL6IP1, NXT1, CAV1, POM121, TMED10, EIF5A, TOMM22, KPNA2	85	753	13588	1.69837	1	0.994326	95.4008
GOTERM_BP_FAT	GO:0006605~protein targeting	3	2.91262	0.198675	ARL6IP1, NXT1, KPNA2	85	133	13588	3.60584	1	0.993034	96.5439
GOTERM_BP_FAT	GO:0015031~protein transport	7	6.79612	0.21435	ARL6IP1, NXT1, POM121, TMED10, EIF5A, TOMM22, KPNA2	85	651	13588	1.71891	1	0.994756	97.44
GOTERM_BP_FAT	GO:0045184~establishment of protein localization	7	6.79612	0.219301	ARL6IP1, NXT1, POM121, TMED10, EIF5A, TOMM22, KPNA2	85	656	13588	1.70581	1	0.994669	97.6745
GOTERM_BP_FAT	GO:0006886~intracellular protein transport	4	3.8835	0.243345	ARL6IP1, NXT1, TMED10, KPNA2	85	276	13588	2.31679	1	0.995618	98.5541
SP_PIR_KEYWORDS	transport	12	11.6505	0.263424	NXT1, SLC1A4, SLC29A1, TRPM3, TTR, POM121, SLC17A6, TMED10, EIF5A, TOMM22, KPNA2, SLC7A5	101	1571	17854	1.35027	1	0.826413	97.7554
GOTERM_BP_FAT	GO:0034613~cellular protein localization	4	3.8835	0.281755	ARL6IP1, NXT1, TMED10, KPNA2	85	299	13588	2.13858	1	0.997454	99.3448
GOTERM_BP_FAT	GO:0070727~cellular macromolecule localization	4	3.8835	0.285127	ARL6IP1, NXT1, TMED10, KPNA2	85	301	13588	2.12437	1	0.997298	99.39
GOTERM_BP_FAT	GO:0055085~transmembrane transport	5	4.85437	0.317032	POM121, SLC17A6, EIF5A, TOMM22, SLC7A5	85	460	13588	1.7376	1	0.998587	99.6952
GOTERM_BP_FAT	GO:0046907~intracellular transport	4	3.8835	0.500758	ARL6IP1, NXT1, TMED10, KPNA2	85	431	13588	1.48361	1	0.998739	99.9974
Annotation Cluster 16	Enrichment Score: 1.03268589537388
Category	Term	Count	%	PValue	Genes	List Total	Pop Hits	Pop Total	Fold Enrichment	Bonferroni	Benjamini	FDR
SMART	SM00181:EGF	5	4.85437	0.00969506	RSPO3, NELL2, NID1, THBS1, PCSK6	39	203	9131	5.7667	0.391562	0.152632	8.99423
SMART	SM00214:VWC	3	2.91262	0.0130766	NELL2, THBS1, CYR61	39	42	9131	16.7234	0.488958	0.154499	11.9563
INTERPRO	IPR001007:von Willebrand factor, type C	3	2.91262	0.0216309	NELL2, THBS1, CYR61	97	42	17763	13.0803	0.997088	0.411867	24.951
INTERPRO	IPR006210:EGF-like	5	4.85437	0.0243556	RSPO3, NELL2, NID1, THBS1, PCSK6	97	203	17763	4.51044	0.998617	0.397351	27.6485
UP_SEQ_FEATURE	domain:EGF-like 1	3	2.91262	0.137308	NELL2, NID1, THBS1	99	106	16021	4.58005	1	0.995988	87.359
INTERPRO	IPR013032:EGF-like region, conserved site	4	3.8835	0.235287	NELL2, NID1, THBS1, EPHB1	97	310	17763	2.36289	1	0.991561	97.0428
INTERPRO	IPR000742:EGF-like, type 3	3	2.91262	0.292205	NELL2, NID1, THBS1	97	199	17763	2.76066	1	0.996872	98.9285
SP_PIR_KEYWORDS	egf-like domain	3	2.91262	0.353783	NELL2, NID1, THBS1	101	222	17854	2.38881	1	0.892504	99.5581
GOTERM_BP_FAT	GO:0007155~cell adhesion	5	4.85437	0.458884	DLC1, NELL2, NID1, THBS1, CYR61	85	561	13588	1.42477	1	0.998978	99.9911
GOTERM_BP_FAT	GO:0022610~biological adhesion	5	4.85437	0.460258	DLC1, NELL2, NID1, THBS1, CYR61	85	562	13588	1.42223	1	0.998782	99.9915
Annotation Cluster 17	Enrichment Score: 0.8620747657930476
Category	Term	Count	%	PValue	Genes	List Total	Pop Hits	Pop Total	Fold Enrichment	Bonferroni	Benjamini	FDR
GOTERM_BP_FAT	GO:0009952~anterior/posterior pattern formation	4	3.8835	0.0690007	SFRP2, OTX2, NR2F2, PCSK6	85	153	13588	4.17932	1	0.970612	66.2515
GOTERM_BP_FAT	GO:0003002~regionalization	4	3.8835	0.146434	SFRP2, OTX2, NR2F2, PCSK6	85	214	13588	2.98802	1	0.992417	90.978
GOTERM_BP_FAT	GO:0007389~pattern specification process	4	3.8835	0.256614	SFRP2, OTX2, NR2F2, PCSK6	85	284	13588	2.25153	1	0.995856	98.8949
Annotation Cluster 18	Enrichment Score: 0.7864014207943795
Category	Term	Count	%	PValue	Genes	List Total	Pop Hits	Pop Total	Fold Enrichment	Bonferroni	Benjamini	FDR
GOTERM_CC_FAT	GO:0005788~endoplasmic reticulum lumen	4	3.8835	0.0125037	PDIA3, PDIA6, CALR, SERPINH1	85	72	12504	8.17255	0.832491	0.105661	13.8285
GOTERM_CC_FAT	GO:0005730~nucleolus	5	4.85437	0.155285	CDCA8, RRP12, NOC4L, RPL12, PES1	85	310	12504	2.37268	1	0.516239	86.4137
GOTERM_CC_FAT	GO:0070013~intracellular organelle lumen	11	10.6796	0.22791	FOS, CDCA8, RRP12, PDIA3, NOC4L, ALDH2, PDIA6, RPL12, CALR, PES1, SERPINH1	85	1133	12504	1.42821	1	0.629415	95.3087
GOTERM_CC_FAT	GO:0043233~organelle lumen	11	10.6796	0.230337	FOS, CDCA8, RRP12, PDIA3, NOC4L, ALDH2, PDIA6, RPL12, CALR, PES1, SERPINH1	85	1136	12504	1.42444	1	0.624057	95.4802
GOTERM_CC_FAT	GO:0031974~membrane-enclosed lumen	11	10.6796	0.261943	FOS, CDCA8, RRP12, PDIA3, NOC4L, ALDH2, PDIA6, RPL12, CALR, PES1, SERPINH1	85	1174	12504	1.37833	1	0.659812	97.2476
GOTERM_CC_FAT	GO:0031981~nuclear lumen	6	5.82524	0.716288	FOS, CDCA8, RRP12, NOC4L, RPL12, PES1	85	883	12504	0.999587	1	0.970033	100
Annotation Cluster 19	Enrichment Score: 0.6778888156909888
Category	Term	Count	%	PValue	Genes	List Total	Pop Hits	Pop Total	Fold Enrichment	Bonferroni	Benjamini	FDR
GOTERM_CC_FAT	GO:0044431~Golgi apparatus part	5	4.85437	0.0664294	CAV1, SULF2, SULF1, TMED10, EXT2	85	227	12504	3.24022	0.999942	0.345829	55.6504
GOTERM_BP_FAT	GO:0006790~sulfur metabolic process	3	2.91262	0.114811	SULF2, SULF1, EXT2	85	94	13588	5.10188	1	0.989027	84.3206
SP_PIR_KEYWORDS	golgi apparatus	5	4.85437	0.374935	CAV1, SULF2, SULF1, TMED10, EXT2	101	553	17854	1.5983	1	0.903396	99.7077
GOTERM_CC_FAT	GO:0005794~Golgi apparatus	5	4.85437	0.679428	CAV1, SULF2, SULF1, TMED10, EXT2	85	682	12504	1.07849	1	0.965457	99.9999
Annotation Cluster 20	Enrichment Score: 0.6092655992579283
Category	Term	Count	%	PValue	Genes	List Total	Pop Hits	Pop Total	Fold Enrichment	Bonferroni	Benjamini	FDR
GOTERM_CC_FAT	GO:0005626~insoluble fraction	7	6.79612	0.143705	RPSA, CAV1, SLC17A6, GUSB, TMED10, CALR, PLEC	85	528	12504	1.95027	1	0.508672	84.0395
GOTERM_CC_FAT	GO:0000267~cell fraction	7	6.79612	0.211028	RPSA, CAV1, SLC17A6, GUSB, TMED10, CALR, PLEC	85	596	12504	1.72775	1	0.617736	93.9409
GOTERM_CC_FAT	GO:0005624~membrane fraction	6	5.82524	0.258002	RPSA, CAV1, SLC17A6, GUSB, TMED10, CALR	85	510	12504	1.73066	1	0.662609	97.0686
GOTERM_CC_FAT	GO:0005792~microsome	3	2.91262	0.331652	GUSB, TMED10, CALR	85	176	12504	2.50749	1	0.752309	99.1487
GOTERM_CC_FAT	GO:0042598~vesicular fraction	3	2.91262	0.346381	GUSB, TMED10, CALR	85	182	12504	2.42482	1	0.754449	99.346
Annotation Cluster 21	Enrichment Score: 0.5897687699431228
Category	Term	Count	%	PValue	Genes	List Total	Pop Hits	Pop Total	Fold Enrichment	Bonferroni	Benjamini	FDR
GOTERM_BP_FAT	GO:0048598~embryonic morphogenesis	6	5.82524	0.0713683	DLC1, WNT5A, RSPO3, OTX2, EXT2, CYR61	85	359	13588	2.67174	1	0.967434	67.5321
GOTERM_BP_FAT	GO:0043009~chordate embryonic development	4	3.8835	0.485051	DLC1, SFRP2, RSPO3, CYR61	85	421	13588	1.51885	1	0.998803	99.9958
GOTERM_BP_FAT	GO:0009792~embryonic development ending in birth or egg hatching	4	3.8835	0.491361	DLC1, SFRP2, RSPO3, CYR61	85	425	13588	1.50455	1	0.998732	99.9965
Annotation Cluster 22	Enrichment Score: 0.5377519333968861
Category	Term	Count	%	PValue	Genes	List Total	Pop Hits	Pop Total	Fold Enrichment	Bonferroni	Benjamini	FDR
GOTERM_BP_FAT	GO:0000280~nuclear division	4	3.8835	0.113242	CDCA8, SETD8, PES1, NUDC	85	190	13588	3.36545	1	0.990729	83.893
GOTERM_BP_FAT	GO:0007067~mitosis	4	3.8835	0.113242	CDCA8, SETD8, PES1, NUDC	85	190	13588	3.36545	1	0.990729	83.893
GOTERM_BP_FAT	GO:0000087~M phase of mitotic cell cycle	4	3.8835	0.118554	CDCA8, SETD8, PES1, NUDC	85	194	13588	3.29606	1	0.988283	85.2982
GOTERM_BP_FAT	GO:0048285~organelle fission	4	3.8835	0.122599	CDCA8, SETD8, PES1, NUDC	85	197	13588	3.24586	1	0.987714	86.2904
GOTERM_BP_FAT	GO:0000278~mitotic cell cycle	4	3.8835	0.191726	CDCA8, SETD8, PES1, NUDC	85	244	13588	2.62064	1	0.994755	96.0594
GOTERM_BP_FAT	GO:0000279~M phase	4	3.8835	0.25495	CDCA8, SETD8, PES1, NUDC	85	283	13588	2.25949	1	0.996243	98.8567
SP_PIR_KEYWORDS	mitosis	3	2.91262	0.265182	CDCA8, SETD8, NUDC	101	179	17854	2.96266	1	0.81965	97.821
GOTERM_BP_FAT	GO:0022403~cell cycle phase	4	3.8835	0.330894	CDCA8, SETD8, PES1, NUDC	85	328	13588	1.9495	1	0.99865	99.7768
SP_PIR_KEYWORDS	cell division	3	2.91262	0.421273	CDCA8, SETD8, NUDC	101	256	17854	2.07155	1	0.929382	99.8877
GOTERM_BP_FAT	GO:0022402~cell cycle process	4	3.8835	0.43994	CDCA8, SETD8, PES1, NUDC	85	393	13588	1.62706	1	0.999461	99.985
GOTERM_BP_FAT	GO:0051301~cell division	3	2.91262	0.521237	CDCA8, SETD8, NUDC	85	281	13588	1.70668	1	0.998992	99.9986
SP_PIR_KEYWORDS	cell cycle	3	2.91262	0.718203	CDCA8, SETD8, NUDC	101	447	17854	1.18639	1	0.995105	100
GOTERM_CC_FAT	GO:0005694~chromosome	3	2.91262	0.726435	CDCA8, SETD8, PES1	85	378	12504	1.16751	1	0.970977	100
GOTERM_BP_FAT	GO:0007049~cell cycle	4	3.8835	0.734943	CDCA8, SETD8, PES1, NUDC	85	611	13588	1.04654	1	0.999968	100
Annotation Cluster 23	Enrichment Score: 0.40500997761520363
Category	Term	Count	%	PValue	Genes	List Total	Pop Hits	Pop Total	Fold Enrichment	Bonferroni	Benjamini	FDR
GOTERM_BP_FAT	GO:0006915~apoptosis	5	4.85437	0.324068	CSRNP3, TMBIM6, SULF1, EIF5A, PIGT	85	465	13588	1.71891	1	0.998622	99.7395
GOTERM_BP_FAT	GO:0012501~programmed cell death	5	4.85437	0.335351	CSRNP3, TMBIM6, SULF1, EIF5A, PIGT	85	473	13588	1.68984	1	0.99839	99.7983
GOTERM_BP_FAT	GO:0008219~cell death	5	4.85437	0.383431	CSRNP3, TMBIM6, SULF1, EIF5A, PIGT	85	507	13588	1.57652	1	0.999103	99.9355
GOTERM_BP_FAT	GO:0016265~death	5	4.85437	0.400359	CSRNP3, TMBIM6, SULF1, EIF5A, PIGT	85	519	13588	1.54007	1	0.999309	99.9578
SP_PIR_KEYWORDS	Apoptosis	3	2.91262	0.565819	CSRNP3, TMBIM6, SULF1	101	337	17854	1.57364	1	0.978633	99.9968
Annotation Cluster 24	Enrichment Score: 0.3824108625544463
Category	Term	Count	%	PValue	Genes	List Total	Pop Hits	Pop Total	Fold Enrichment	Bonferroni	Benjamini	FDR
GOTERM_BP_FAT	GO:0048514~blood vessel morphogenesis	3	2.91262	0.34686	CAV1, NR2F2, CYR61	85	198	13588	2.4221	1	0.998594	99.8453
GOTERM_BP_FAT	GO:0001568~blood vessel development	3	2.91262	0.447028	CAV1, NR2F2, CYR61	85	244	13588	1.96548	1	0.999329	99.9877
GOTERM_BP_FAT	GO:0001944~vasculature development	3	2.91262	0.459492	CAV1, NR2F2, CYR61	85	250	13588	1.91831	1	0.998881	99.9913
Annotation Cluster 25	Enrichment Score: 0.33956431297167206
Category	Term	Count	%	PValue	Genes	List Total	Pop Hits	Pop Total	Fold Enrichment	Bonferroni	Benjamini	FDR
GOTERM_BP_FAT	GO:0042981~regulation of apoptosis	5	4.85437	0.447854	NME2, PDIA3, CSRNP3, RPS3A, TMBIM6	85	553	13588	1.44538	1	0.999257	99.9879
GOTERM_BP_FAT	GO:0043065~positive regulation of apoptosis	3	2.91262	0.455355	PDIA3, CSRNP3, RPS3A	85	248	13588	1.93378	1	0.999111	99.9902
GOTERM_BP_FAT	GO:0043067~regulation of programmed cell death	5	4.85437	0.457509	NME2, PDIA3, CSRNP3, RPS3A, TMBIM6	85	560	13588	1.42731	1	0.999053	99.9908
GOTERM_BP_FAT	GO:0043068~positive regulation of programmed cell death	3	2.91262	0.459492	PDIA3, CSRNP3, RPS3A	85	250	13588	1.91831	1	0.998881	99.9913
GOTERM_BP_FAT	GO:0010941~regulation of cell death	5	4.85437	0.461631	NME2, PDIA3, CSRNP3, RPS3A, TMBIM6	85	563	13588	1.41971	1	0.998694	99.9918
GOTERM_BP_FAT	GO:0010942~positive regulation of cell death	3	2.91262	0.463612	PDIA3, CSRNP3, RPS3A	85	252	13588	1.90308	1	0.998619	99.9922
Annotation Cluster 26	Enrichment Score: 0.28098441232715077
Category	Term	Count	%	PValue	Genes	List Total	Pop Hits	Pop Total	Fold Enrichment	Bonferroni	Benjamini	FDR
SP_PIR_KEYWORDS	calcium binding	4	3.8835	0.00231206	NID1, SPARC, CALR, THBS1	101	47	17854	15.0444	0.354342	0.0307658	2.83348
SP_PIR_KEYWORDS	DNA binding	5	4.85437	0.0570762	EGR1, FOS, OTX2, FOSB, UBA52	101	258	17854	3.42582	0.999985	0.358727	51.799
GOTERM_MF_FAT	GO:0005509~calcium ion binding	8	7.76699	0.185894	SULF2, SPARCL1, NELL2, SULF1, NID1, SPARC, CALR, THBS1	75	840	13288	1.68737	1	0.884615	91.8247
SP_PIR_KEYWORDS	calcium	7	6.79612	0.226267	SULF2, SPARCL1, SULF1, NID1, SPARC, CALR, THBS1	101	731	17854	1.69276	1	0.780219	95.8643
GOTERM_MF_FAT	GO:0003700~transcription factor activity	7	6.79612	0.263052	EGR1, FOS, CSRNP3, OTX2, FOSB, ST18, NR2F2	75	776	13288	1.59821	1	0.951026	97.5679
GOTERM_MF_FAT	GO:0046983~protein dimerization activity	4	3.8835	0.294016	FOS, OTX2, FOSB, EXT2	75	340	13288	2.08439	1	0.961207	98.5578
GOTERM_BP_FAT	GO:0006357~regulation of transcription from RNA polymerase II promoter	6	5.82524	0.332665	EGR1, FOS, CSRNP3, OTX2, ST18, NR2F2	85	616	13588	1.55707	1	0.998506	99.7856
GOTERM_BP_FAT	GO:0045944~positive regulation of transcription from RNA polymerase II promoter	4	3.8835	0.381714	EGR1, FOS, CSRNP3, OTX2	85	358	13588	1.78613	1	0.999188	99.9328
GOTERM_BP_FAT	GO:0010557~positive regulation of macromolecule biosynthetic process	5	4.85437	0.415816	EGR1, FOS, CSRNP3, OTX2, EIF5A	85	530	13588	1.5081	1	0.999368	99.9716
GOTERM_BP_FAT	GO:0000122~negative regulation of transcription from RNA polymerase II promoter	3	2.91262	0.419499	EGR1, ST18, NR2F2	85	231	13588	2.07609	1	0.999336	99.9742
GOTERM_BP_FAT	GO:0031328~positive regulation of cellular biosynthetic process	5	4.85437	0.446471	EGR1, FOS, CSRNP3, OTX2, EIF5A	85	552	13588	1.448	1	0.9994	99.9875
GOTERM_BP_FAT	GO:0051172~negative regulation of nitrogen compound metabolic process	4	3.8835	0.452985	EGR1, CAV1, ST18, NR2F2	85	401	13588	1.5946	1	0.999254	99.9895
GOTERM_BP_FAT	GO:0009891~positive regulation of biosynthetic process	5	4.85437	0.453378	EGR1, FOS, CSRNP3, OTX2, EIF5A	85	557	13588	1.435	1	0.99917	99.9897
GOTERM_BP_FAT	GO:0045893~positive regulation of transcription, DNA-dependent	4	3.8835	0.477113	EGR1, FOS, CSRNP3, OTX2	85	416	13588	1.5371	1	0.998838	99.9947
GOTERM_BP_FAT	GO:0051254~positive regulation of RNA metabolic process	4	3.8835	0.481882	EGR1, FOS, CSRNP3, OTX2	85	419	13588	1.5261	1	0.998839	99.9954
GOTERM_BP_FAT	GO:0031327~negative regulation of cellular biosynthetic process	4	3.8835	0.499198	EGR1, CAV1, ST18, NR2F2	85	430	13588	1.48706	1	0.99881	99.9973
GOTERM_BP_FAT	GO:0009890~negative regulation of biosynthetic process	4	3.8835	0.505424	EGR1, CAV1, ST18, NR2F2	85	434	13588	1.47335	1	0.998744	99.9977
GOTERM_BP_FAT	GO:0010604~positive regulation of macromolecule metabolic process	5	4.85437	0.554286	EGR1, FOS, CSRNP3, OTX2, EIF5A	85	633	13588	1.26271	1	0.999378	99.9995
GOTERM_BP_FAT	GO:0045941~positive regulation of transcription	4	3.8835	0.56688	EGR1, FOS, CSRNP3, OTX2	85	475	13588	1.34618	1	0.999474	99.9997
GOTERM_BP_FAT	GO:0045892~negative regulation of transcription, DNA-dependent	3	2.91262	0.57112	EGR1, ST18, NR2F2	85	308	13588	1.55707	1	0.999473	99.9997
GOTERM_BP_FAT	GO:0051253~negative regulation of RNA metabolic process	3	2.91262	0.574665	EGR1, ST18, NR2F2	85	310	13588	1.54702	1	0.999464	99.9998
GOTERM_BP_FAT	GO:0010628~positive regulation of gene expression	4	3.8835	0.585396	EGR1, FOS, CSRNP3, OTX2	85	488	13588	1.31032	1	0.999531	99.9998
GOTERM_MF_FAT	GO:0043565~sequence-specific DNA binding	4	3.8835	0.603777	FOS, OTX2, FOSB, NR2F2	75	556	13288	1.27463	1	0.999721	99.9987
GOTERM_BP_FAT	GO:0010605~negative regulation of macromolecule metabolic process	4	3.8835	0.610209	EGR1, CAV1, ST18, NR2F2	85	506	13588	1.26371	1	0.999638	99.9999
GOTERM_BP_FAT	GO:0045935~positive regulation of nucleobase, nucleoside, nucleotide and nucleic acid metabolic process	4	3.8835	0.61559	EGR1, FOS, CSRNP3, OTX2	85	510	13588	1.25379	1	0.999647	100
GOTERM_BP_FAT	GO:0051173~positive regulation of nitrogen compound metabolic process	4	3.8835	0.636623	EGR1, FOS, CSRNP3, OTX2	85	526	13588	1.21566	1	0.999757	100
SP_PIR_KEYWORDS	repressor	3	2.91262	0.647022	PELP1, SETD8, ST18	101	391	17854	1.35631	1	0.989715	99.9998
GOTERM_MF_FAT	GO:0030528~transcription regulator activity	7	6.79612	0.67354	EGR1, FOS, CSRNP3, OTX2, FOSB, ST18, NR2F2	75	1206	13288	1.02837	1	0.999918	99.9999
GOTERM_BP_FAT	GO:0016481~negative regulation of transcription	3	2.91262	0.674147	EGR1, ST18, NR2F2	85	372	13588	1.28918	1	0.99989	100
GOTERM_BP_FAT	GO:0045934~negative regulation of nucleobase, nucleoside, nucleotide and nucleic acid metabolic process	3	2.91262	0.708659	EGR1, ST18, NR2F2	85	397	13588	1.208	1	0.999951	100
GOTERM_BP_FAT	GO:0010629~negative regulation of gene expression	3	2.91262	0.725388	EGR1, ST18, NR2F2	85	410	13588	1.1697	1	0.999962	100
GOTERM_BP_FAT	GO:0010558~negative regulation of macromolecule biosynthetic process	3	2.91262	0.73528	EGR1, ST18, NR2F2	85	418	13588	1.14731	1	0.999964	100
SP_PIR_KEYWORDS	activator	3	2.91262	0.758389	EGR1, CSRNP3, PELP1	101	484	17854	1.0957	1	0.996694	100
SP_PIR_KEYWORDS	dna-binding	7	6.79612	0.807949	EGR1, FOS, CSRNP3, OTX2, FOSB, ST18, NR2F2	101	1404	17854	0.881343	1	0.998492	100
GOTERM_BP_FAT	GO:0006355~regulation of transcription, DNA-dependent	7	6.79612	0.901684	EGR1, FOS, CSRNP3, OTX2, FOSB, ST18, NR2F2	85	1465	13588	0.763831	1	1	100
GOTERM_BP_FAT	GO:0051252~regulation of RNA metabolic process	7	6.79612	0.909594	EGR1, FOS, CSRNP3, OTX2, FOSB, ST18, NR2F2	85	1488	13588	0.752024	1	1	100
SP_PIR_KEYWORDS	zinc-finger	5	4.85437	0.912143	EGR1, INSM1, ST18, NR2F2, UBA52	101	1204	17854	0.734104	1	0.999829	100
SP_PIR_KEYWORDS	transcription regulation	6	5.82524	0.941121	EGR1, CSRNP3, OTX2, SETD8, ST18, NR2F2	101	1546	17854	0.68605	1	0.99995	100
GOTERM_MF_FAT	GO:0003677~DNA binding	7	6.79612	0.943346	EGR1, FOS, CSRNP3, OTX2, FOSB, ST18, NR2F2	75	1781	13288	0.696358	1	1	100
GOTERM_MF_FAT	GO:0043169~cation binding	16	15.534	0.969985	INSM1, EGR1, SPARCL1, GUSB, NELL2, NID1, SPARC, CALR, NME2, SLC17A6, SULF2, SULF1, ST18, THBS1, NR2F2, UBA52	75	3885	13288	0.729671	1	1	100
GOTERM_MF_FAT	GO:0043167~ion binding	16	15.534	0.974289	INSM1, EGR1, SPARCL1, GUSB, NELL2, NID1, SPARC, CALR, NME2, SLC17A6, SULF2, SULF1, ST18, THBS1, NR2F2, UBA52	75	3934	13288	0.720583	1	1	100
SP_PIR_KEYWORDS	Transcription	6	5.82524	0.974978	EGR1, CSRNP3, PELP1, SETD8, ST18, NR2F2	101	1769	17854	0.599567	1	0.999995	100
GOTERM_MF_FAT	GO:0046872~metal ion binding	15	14.5631	0.982716	INSM1, EGR1, SPARCL1, NELL2, NID1, SPARC, CALR, NME2, SLC17A6, SULF2, SULF1, ST18, THBS1, NR2F2, UBA52	75	3850	13288	0.690286	1	1	100
SP_PIR_KEYWORDS	zinc	6	5.82524	0.984456	EGR1, INSM1, ST18, NR2F2, CALR, UBA52	101	1886	17854	0.562372	1	0.999999	100
SP_PIR_KEYWORDS	metal-binding	9	8.73786	0.988189	EGR1, INSM1, NME2, SULF2, SULF1, ST18, NR2F2, CALR, UBA52	101	2682	17854	0.593196	1	0.999999	100
GOTERM_BP_FAT	GO:0006350~transcription	6	5.82524	0.989081	EGR1, CSRNP3, PELP1, SETD8, ST18, NR2F2	85	1772	13588	0.541283	1	1	100
GOTERM_BP_FAT	GO:0045449~regulation of transcription	8	7.76699	0.989639	EGR1, FOS, CSRNP3, OTX2, SETD8, FOSB, ST18, NR2F2	85	2227	13588	0.574257	1	1	100
GOTERM_MF_FAT	GO:0008270~zinc ion binding	6	5.82524	0.994401	EGR1, INSM1, ST18, NR2F2, CALR, UBA52	75	2105	13288	0.505007	1	1	100
GOTERM_MF_FAT	GO:0046914~transition metal ion binding	7	6.79612	0.998213	EGR1, INSM1, SPARC, ST18, NR2F2, CALR, UBA52	75	2608	13288	0.475542	1	1	100
Annotation Cluster 27	Enrichment Score: 0.2583398145736261
Category	Term	Count	%	PValue	Genes	List Total	Pop Hits	Pop Total	Fold Enrichment	Bonferroni	Benjamini	FDR
GOTERM_CC_FAT	GO:0031967~organelle envelope	7	6.79612	0.154767	TUFM, NXT1, POM121, SUCLG1, EIF5A, TOMM22, KPNA2	85	540	12504	1.90693	1	0.525803	86.3147
GOTERM_CC_FAT	GO:0031975~envelope	7	6.79612	0.156647	TUFM, NXT1, POM121, SUCLG1, EIF5A, TOMM22, KPNA2	85	542	12504	1.89989	1	0.509114	86.6705
GOTERM_CC_FAT	GO:0005743~mitochondrial inner membrane	3	2.91262	0.594987	TUFM, SUCLG1, TOMM22	85	296	12504	1.49094	1	0.942277	99.9977
GOTERM_CC_FAT	GO:0019866~organelle inner membrane	3	2.91262	0.623856	TUFM, SUCLG1, TOMM22	85	312	12504	1.41448	1	0.947877	99.9991
GOTERM_CC_FAT	GO:0044429~mitochondrial part	4	3.8835	0.689756	TUFM, SUCLG1, ALDH2, TOMM22	85	524	12504	1.12295	1	0.966351	99.9999
GOTERM_CC_FAT	GO:0031966~mitochondrial membrane	3	2.91262	0.712547	TUFM, SUCLG1, TOMM22	85	368	12504	1.19923	1	0.971005	100
SP_PIR_KEYWORDS	transit peptide	3	2.91262	0.72958	TUFM, SUCLG1, ALDH2	101	457	17854	1.16043	1	0.995361	100
GOTERM_CC_FAT	GO:0005740~mitochondrial envelope	3	2.91262	0.743649	TUFM, SUCLG1, TOMM22	85	391	12504	1.12869	1	0.973931	100
UP_SEQ_FEATURE	transit peptide:Mitochondrion	3	2.91262	0.764952	TUFM, SUCLG1, ALDH2	99	449	16021	1.08126	1	1	100
SP_PIR_KEYWORDS	mitochondrion	4	3.8835	0.824956	TUFM, SUCLG1, ALDH2, TOMM22	101	790	17854	0.89505	1	0.998622	100
GOTERM_CC_FAT	GO:0005739~mitochondrion	6	5.82524	0.950725	TUFM, NME2, CAV1, SUCLG1, ALDH2, TOMM22	85	1322	12504	0.667652	1	0.999447	100
Annotation Cluster 28	Enrichment Score: 0.03722922184297321
Category	Term	Count	%	PValue	Genes	List Total	Pop Hits	Pop Total	Fold Enrichment	Bonferroni	Benjamini	FDR
GOTERM_CC_FAT	GO:0005887~integral to plasma membrane	3	2.91262	0.877436	SLC29A1, CAV1, EPHB1	85	531	12504	0.831107	1	0.995571	100
GOTERM_CC_FAT	GO:0031226~intrinsic to plasma membrane	3	2.91262	0.89084	SLC29A1, CAV1, EPHB1	85	552	12504	0.799488	1	0.996362	100
GOTERM_CC_FAT	GO:0044459~plasma membrane part	6	5.82524	0.98923	SLC29A1, CAV1, SLC17A6, EIF5A, CALR, EPHB1	85	1633	12504	0.540499	1	0.999985	100
Annotation Cluster 29	Enrichment Score: 0.03164475977673473
Category	Term	Count	%	PValue	Genes	List Total	Pop Hits	Pop Total	Fold Enrichment	Bonferroni	Benjamini	FDR
UP_SEQ_FEATURE	topological domain:Cytoplasmic	15	14.5631	0.825125	TMX2, CAV1, PIGT, TMED9, APCDD1, EPHB1, SLC29A1, SLC1A4, SDC1, SLC17A6, 2310044H10RIK, RPN1, TMED10, TOMM22, EXT2	99	2780	16021	0.873174	1	1	100
UP_SEQ_FEATURE	transmembrane region	22	21.3592	0.860972	ARL6IP1, TMX2, CAV1, RRP12, NOC4L, TMBIM6, PIGT, APCDD1, TMED9, MYADM, SLC7A5, EPHB1, SLC29A1, SLC1A4, SDC1, SLC17A6, POM121, 2310044H10RIK, RPN1, TMED10, TOMM22, EXT2	99	4113	16021	0.865602	1	1	100
SP_PIR_KEYWORDS	membrane	25	24.2718	0.947383	ARL6IP1, TMX2, CAV1, EIF5A, APCDD1, SLC7A5, EPHB1, SLC1A4, SLC29A1, POM121, RPN1, 2310044H10RIK, TMED10, RPSA, RRP12, NOC4L, TMBIM6, PIGT, TMED9, MYADM, NME2, SDC1, SLC17A6, TOMM22, EXT2	101	5507	17854	0.802489	1	0.99996	100
SP_PIR_KEYWORDS	transmembrane	23	22.3301	0.960877	ARL6IP1, TMX2, TRPM3, CAV1, RRP12, NOC4L, TMBIM6, PIGT, APCDD1, TMED9, MYADM, SLC7A5, EPHB1, SLC29A1, SLC1A4, SDC1, SLC17A6, POM121, 2310044H10RIK, RPN1, TMED10, TOMM22, EXT2	101	5237	17854	0.776353	1	0.999982	100
GOTERM_CC_FAT	GO:0016021~integral to membrane	26	25.2427	0.999028	ARL6IP1, TMX2, NXT1, CAV1, EIF5A, APCDD1, SLC7A5, EPHB1, SLC1A4, SLC29A1, POM121, 2310044H10RIK, RPN1, TMED10, TRPM3, RRP12, NOC4L, TMBIM6, PIGT, TMED9, MYADM, SDC1, SLC17A6, TOMM22, EXT2, KPNA2	85	5709	12504	0.669951	1	1	100
GOTERM_CC_FAT	GO:0031224~intrinsic to membrane	26	25.2427	0.999658	ARL6IP1, TMX2, NXT1, CAV1, EIF5A, APCDD1, SLC7A5, EPHB1, SLC1A4, SLC29A1, POM121, 2310044H10RIK, RPN1, TMED10, TRPM3, RRP12, NOC4L, TMBIM6, PIGT, TMED9, MYADM, SDC1, SLC17A6, TOMM22, EXT2, KPNA2	85	5914	12504	0.646729	1	1	100

## Sheet: RPs
ID	WT	OE	fold_change	sig
Rpl12	142.827	190.597	0.416262	yes
Rpl13	226.76	313.097	0.465445	yes
Rpl27a	77.6067	105.249	0.439553	yes
Rpl3	134.376	186.216	0.4707	yes
Rpl30	261.054	356.352	0.448955	yes
Rpl9	148.106	201.798	0.446284	yes
Rplp0	77.2841	116.827	0.596126	yes
Rps12	181.87	251.775	0.46923	yes
Rps17	214.387	318.977	0.573238	yes
Rps25	122.815	171.752	0.483839	yes
Rps26	147.364	213.501	0.534863	yes
Rps3	66.1886	90.9604	0.458657	yes
Rps4x	175.76	248.514	0.499717	yes
Rps5	101.362	146.533	0.531704	yes
Rps8	187.283	261.103	0.479399	yes
Rps9	207.042	284.922	0.460645	yes
Rpsa	90.3094	119.81	0.407801	yes
Uba52	183.845	255.498	0.474818	yes
Eif2a	33.1795	36.8989	0.153286	no
Fau	58.1261	73.5515	0.33957	no
Mcts1	6.54892	5.9902	-0.128653	no
Mcts2	46.5856	49.2175	0.0792852	no
Mrps18a	10.1191	7.97075	-0.344299	no
Mrps18c	19.7785	20.7176	0.0669183	no
Rpl10	339.242	416.344	0.295462	no
Rpl10a	406.418	486.061	0.258173	no
Rpl11	265.073	335.234	0.338776	no
Rpl13a	692.179	1198.59	0.79212	no
Rpl14	85.9178	106.101	0.304414	no
Rpl15	110.174	119.805	0.120901	no
Rpl17	169.419	191.833	0.179253	no
Rpl18	218.716	270.527	0.30671	no
Rpl18a	182.313	226.702	0.314376	no
Rpl19	119.428	157.678	0.40084	no
Rpl21	135.399	147.875	0.127169	no
Rpl22	34.9804	46.0175	0.395635	no
Rpl22l1	26.2825	30.6032	0.219583	no
Rpl23	69.6421	87.3713	0.327199	no
Rpl23a	165.047	210.055	0.34789	no
Rpl24	90.2069	107.474	0.252674	no
Rpl26	175.076	216.561	0.306791	no
Rpl27	84.6552	110.265	0.381305	no
Rpl28	180.417	210.544	0.222787	no
Rpl29	204.095	247.898	0.280508	no
Rpl31	152.836	187.961	0.298449	no
Rpl32	208.27	282.225	0.438391	no
Rpl35	112.778	150.846	0.419593	no
Rpl35a	143.803	143.264	-0.00541994	no
Rpl36	171.233	196.081	0.195491	no
Rpl36a	141.639	171.377	0.274954	no
Rpl37	65.8191	85.7294	0.381284	no
Rpl37a	84.9326	97.6554	0.201382	no
Rpl38	314.189	411.479	0.389187	no
Rpl39	188.336	236.495	0.328502	no
Rpl4	297.29	369.646	0.314273	no
Rpl5	103.904	137.29	0.401979	no
Rpl6	140.621	170.35	0.276686	no
Rpl7	63.0296	78.5969	0.318444	no
Rpl7a	314.22	347.704	0.146085	no
Rpl7l1	17.9177	16.7411	-0.0979927	no
Rpl8	84.1431	101.345	0.268354	no
Rplp1	58.8233	82.5443	0.488779	no
Rplp2	83.8514	119.527	0.511427	no
Rps10	96.9022	129.145	0.414396	no
Rps11	210.31	242.886	0.20776	no
Rps13	75.1294	101.849	0.438989	no
Rps14	54.8985	70.7434	0.365828	no
Rps15	389.511	474.137	0.283641	no
Rps15a	53.8622	54.1036	0.0064502	no
Rps16	88.7228	120.041	0.436156	no
Rps18	245.899	310.445	0.336271	no
Rps19	91.2249	106.548	0.224009	no
Rps2	125.264	141.169	0.172453	no
Rps20	136.047	177.405	0.382935	no
Rps21	139.938	139.942	4.14e-05	no
Rps23	121.074	161.479	0.415462	no
Rps24	100.565	131.731	0.389466	no
Rps27	461.766	561.503	0.282131	no
Rps27a	95.1319	118.122	0.312277	no
Rps27l	22.9908	23.17	0.0111968	no
Rps28	181.463	221.711	0.289001	no
Rps29	165.458	209.247	0.338743	no
Rps6	158.6	200.876	0.34091	no
Rps7	91.4514	115.24	0.333567	no
Rsl1d1	70.2548	88.4309	0.331954	no
Rsl24d1	16.227	16.814	0.0512693	no
Surf6	9.89925	9.56535	-0.049501	no
Zcchc17	7.62795	8.63654	0.179158	no
Zfp622	8.57199	11.1504	0.379391	no
