# Supplementary material for: Downregulation of ribosome biogenesis during early forebrain development
Source: eLife. 2018 May 10;7:e36998. doi: 10.7554/eLife.36998 (PMC5984036; doi:10.7554/eLife.36998)
Supplement: Supplementary file 1. [file elife-36998-supp1.xlsx]

## Sheet: All genes (FPKM>1)
Test ID	Gene Name	Locus	E8.5 FPKM	E10.5 FPKM	log2(fold_change)	p_value	q_value	significant
XLOC_000001	Lypla1	chr1:4797956-4836816	23.1337	14.3481	-0.689131	2.60646e-05	0.000293127	yes
XLOC_000002	Tcea1	chr1:4847774-4887990	78.6274	58.7701	-0.419951	0.00887057	0.0403305	yes
XLOC_000003	Atp6v1h	chr1:5073253-5152630	10.863	11.0278	0.0217176	0.916201	0.960466	no
XLOC_000005	Rb1cc1	chr1:6204742-6266185	7.67306	10.0227	0.3854	0.0188412	0.0718547	no
XLOC_000007	St18	chr1:6477311-6851021	0.0139708	5.55235	8.63454	1.48985e-10	4.84988e-09	yes
XLOC_000008	Pcmtd1	chr1:7079000-7163790	3.63988	6.57471	0.853036	3.55655e-05	0.00038461	yes
XLOC_000009	Rrs1	chr1:9535488-9537536	20.954	12.2379	-0.775872	4.23282e-05	0.000447874	yes
XLOC_000012	1700034P13Rik	chr1:9709888-9761337	3.39437	1.65365	-1.03749	0.305192	0.499288	no
XLOC_000014	6030422M02Rik	chr1:9898718-9934199	1.00131	0.623511	-0.683408	0.272131	0.465364	no
XLOC_000015	Cspp1	chr1:10028292-10126849	9.0371	9.12305	0.0136555	0.94796	0.977371	no
XLOC_000016	Prex2	chr1:10983545-11293763	2.08362	3.33328	0.67785	0.000232938	0.00194291	yes
XLOC_000018	4932411L15	chr1:12657643-12663171	13.953	13.9602	0.000739848	0.996533	0.998098	no
XLOC_000019	Sulf1	chr1:12682471-12851366	23.7673	15.2203	-0.642982	0.000394579	0.00306147	yes
XLOC_000022	Terf1	chr1:15795728-15833510	22.8638	17.8708	-0.355459	0.14293	0.30561	no
XLOC_000023	Rdh10	chr1:16095962-16123849	5.35137	1.67151	-1.67875	3.34067e-08	7.37529e-07	yes
XLOC_000025	Tmem70	chr1:16655271-16668356	8.58931	6.59771	-0.380577	0.097825	0.238561	no
XLOC_000026	Ly96	chr1:16678536-16699686	0.247541	1.29152	2.38333	0.077383	0.203656	no
XLOC_000027	Gdap1	chr1:17135453-17154351	0.179671	3.98451	4.47097	6.66134e-16	4.53753e-14	yes
XLOC_000029	Crispld1	chr1:17717491-17759853	1.04839	0.752934	-0.477582	0.125625	0.280976	no
XLOC_000031	Tfap2b	chr1:19198994-19228815	1.83156	0.403969	-2.18075	9.88822e-11	3.32053e-09	yes
XLOC_000036	Paqr8	chr1:20880640-20929864	1.77496	2.27805	0.36001	0.136102	0.295333	no
XLOC_000038	Tmem14a	chr1:21208711-21220421	2.52893	2.17671	-0.216377	0.628121	0.777374	no
XLOC_000043	-	chr1:23263131-23268161	1.61802	2.45505	0.601518	0.164742	0.334286	no
XLOC_000049	Col9a1	chr1:24184448-24259577	1.00395	0.119032	-3.07627	1.34957e-06	2.11566e-05	yes
XLOC_000050	Lmbrd1	chr1:24685382-24823146	4.216	3.12343	-0.432744	0.0274782	0.096365	no
XLOC_000054	Khdrbs2	chr1:32229632-32715319	0.925904	1.75312	0.920989	0.0165468	0.0650889	no
XLOC_000056	Rab23	chr1:33776740-33799409	11.5136	9.89196	-0.219006	0.200415	0.378489	no
XLOC_000057	-	chr1:33965070-34025739	1.82461	0.555775	-1.71502	0.171016	0.341872	no
XLOC_000058	Dst	chr1:34062658-34365499	6.57667	5.71142	-0.203508	0.275951	0.469217	no
XLOC_000059	Imp4	chr1:34496662-34507025	33.4592	19.1049	-0.808457	0.000149611	0.00132948	yes
XLOC_000065	Plekhb2	chr1:34906803-34936430	4.5819	7.04912	0.621498	0.0103191	0.0452193	yes
XLOC_000066	Hs6st1	chr1:36125244-36163291	13.5979	9.03535	-0.589728	0.00133196	0.00849837	yes
XLOC_000068	Cnnm4	chr1:36528441-36565621	2.74872	2.21207	-0.313363	0.221608	0.404828	no
XLOC_000069	Cnnm3	chr1:36568720-36585082	7.38115	5.1134	-0.529563	0.00734332	0.0345352	yes
XLOC_000070	Cox5b	chr1:36748331-36750233	95.8106	54.1608	-0.822935	2.34649e-05	0.000267187	yes
XLOC_000074	Inpp4a	chr1:37356737-37467580	1.66797	2.2196	0.412208	0.284162	0.477621	no
XLOC_000075	Unc50	chr1:37487016-37495969	40.6622	35.6088	-0.191454	0.315331	0.509753	no
XLOC_000076	Lipt1	chr1:37929050-37933143	1.85073	1.48535	-0.31729	0.449066	0.636378	no
XLOC_000077	Mrpl30	chr1:37947397-37955178	59.0773	46.5636	-0.3434	0.0673057	0.184967	no
XLOC_000078	Eif5b	chr1:38054854-38186507	32.4357	29.1305	-0.155052	0.364806	0.560003	no
XLOC_000080	Pdcl3	chr1:39044658-39054081	12.7487	10.2092	-0.320487	0.106877	0.25259	no
XLOC_000082	Rpl31	chr1:39424671-39535592	837.384	510.019	-0.71534	0.000113057	0.00105245	yes
XLOC_000083	D1Bwg0212e	chr1:39592646-39603722	16.8798	9.34019	-0.853775	3.27202e-06	4.64957e-05	yes
XLOC_000084	Map4k4	chr1:39957757-40083201	32.0252	29.7355	-0.107025	0.536151	0.707805	no
XLOC_000094	-	chr1:42752409-42753517	0.0780992	5.49919	6.13777	3.62938e-05	0.000391601	yes
XLOC_000095	Pou3f3	chr1:42753990-42770450	0.597749	38.8749	6.02315	0	0	yes
XLOC_000096	Mrps9	chr1:42908077-42962528	12.2499	10.741	-0.189645	0.395521	0.589387	no
XLOC_000098	AI597479	chr1:43155554-43173708	15.5734	11.6554	-0.418082	0.017863	0.0689882	no
XLOC_000099	Nck2	chr1:43502595-43628238	5.01838	4.75198	-0.0786921	0.752509	0.86307	no
XLOC_000101	Tpp2	chr1:43990851-44059816	29.1781	25.6821	-0.184123	0.288397	0.48153	no
XLOC_000102	Bivm	chr1:44175852-44201616	10.3365	9.38957	-0.138617	0.466054	0.649112	no
XLOC_000103	Ercc5	chr1:44204588-44238105	6.65938	8.01549	0.267402	0.207491	0.387349	no
XLOC_000104	Gulp1	chr1:44608515-44853681	7.49843	6.49752	-0.206699	0.260512	0.451672	no
XLOC_000105	Col3a1	chr1:45368382-45406551	0.0853897	2.31603	4.76145	4.52494e-11	1.5863e-09	yes
XLOC_000106	Wdr75	chr1:45852345-45880458	36.0225	20.4782	-0.814805	5.14459e-07	8.90349e-06	yes
XLOC_000110	Stat4	chr1:52065087-52168086	0.427766	5.06932	3.5669	1.89537e-12	8.2453e-11	yes
XLOC_000111	Stat1	chr1:52176281-52218897	0.838774	2.1139	1.33356	2.32163e-05	0.000264829	yes
XLOC_000112	Tmem194b	chr1:52687542-52708763	2.59685	2.67506	0.0428114	0.902937	0.953236	no
XLOC_000113	Hibch	chr1:52901889-52977704	6.03737	7.00008	0.213452	0.369086	0.563866	no
XLOC_000115	Ormdl1	chr1:53353938-53367089	19.9486	21.8849	0.13365	0.442502	0.630767	no
XLOC_000116	Osgepl1	chr1:53370371-53383068	10.7932	9.43473	-0.194074	0.434213	0.624277	no
XLOC_000118	Coq10b	chr1:55109613-55129546	2.62808	3.13635	0.255076	0.405631	0.599089	no
XLOC_000119	Hspe1	chr1:55144991-55148161	794.508	331.45	-1.26127	9.32587e-15	5.47566e-13	yes
XLOC_000120	Mob4	chr1:55188088-55211743	21.0613	17.964	-0.229492	0.158061	0.325242	no
XLOC_000121	Mars2	chr1:55294020-55296902	2.29097	1.86386	-0.297664	0.314002	0.508653	no
XLOC_000125	1700066M21Rik	chr1:57434463-57442266	3.26768	2.657	-0.298473	0.206922	0.386711	no
XLOC_000126	9430016H08Rik	chr1:57445087-57474787	10.7256	8.18689	-0.38967	0.20949	0.39024	no
XLOC_000127	Spats2l	chr1:57831697-58005722	0.756703	1.06116	0.48784	0.23151	0.417422	no
XLOC_000128	Sgol2	chr1:58042183-58083121	15.6917	18.1222	0.20776	0.221482	0.404676	no
XLOC_000133	Bzw1	chr1:58449781-58464192	134.609	119.013	-0.177664	0.336204	0.531052	no
XLOC_000134	Nif3l1	chr1:58487836-58561791	16.6102	12.0196	-0.466678	0.111724	0.260254	no
XLOC_000135	Ndufb3	chr1:58643442-58652792	46.4534	27.3648	-0.763464	0.00103042	0.00688602	yes
XLOC_000137	Cflar	chr1:58768311-58815726	5.47206	7.37839	0.431222	0.0977629	0.23856	no
XLOC_000138	Casp8	chr1:58852217-58904347	2.70537	2.06325	-0.390905	0.208573	0.389075	no
XLOC_000139	Stradb	chr1:59030414-59051965	2.15414	3.81051	0.822872	0.00719377	0.0340242	yes
XLOC_000141	Fzd7	chr1:59538990-59543799	25.2255	10.8851	-1.21253	1.85407e-13	9.33916e-12	yes
XLOC_000143	Nop58	chr1:59741849-59768354	128.504	89.9822	-0.5141	0.00161893	0.00998325	yes
XLOC_000146	Bmpr2	chr1:59821120-59934510	9.45626	23.6264	1.32106	5.28614e-09	1.33041e-07	yes
XLOC_000147	Fam117b	chr1:59969849-60042190	12.0387	11.671	-0.044746	0.784292	0.882184	no
XLOC_000148	Carf	chr1:60131622-60207878	1.21663	1.43217	0.23532	0.741797	0.856068	no
XLOC_000149	Nbeal1	chr1:60237442-60395923	4.36924	3.41361	-0.356084	0.160025	0.327949	no
XLOC_000150	Cyp20a1	chr1:60400159-60444903	8.38965	6.45328	-0.378579	0.0742179	0.197416	no
XLOC_000151	Abi2	chr1:60466462-60538007	27.5904	25.746	-0.0998161	0.542633	0.712399	no
XLOC_000155	9530026F06Rik	chr1:61435275-61452748	1.29937	1.73043	0.41332	0.510247	0.686534	no
XLOC_000156	Pard3b	chr1:61685397-62688862	0.895378	2.37452	1.40707	2.66295e-05	0.000298428	yes
XLOC_000157	Nrp2	chr1:62749890-62865266	13.2808	1.49552	-3.15062	0	0	yes
XLOC_000159	Eef1b2	chr1:63223404-63227060	237.999	107.903	-1.14122	5.92548e-12	2.36784e-10	yes
XLOC_000160	Snora41	chr1:63223404-63227060	54.4986	14.2706	-1.93317	0.910109	0.957614	no
XLOC_000161	Zdbf2	chr1:63319842-63361155	9.81869	13.5649	0.466272	0.00397035	0.0209646	yes
XLOC_000162	Adam23	chr1:63492477-63643089	1.94501	3.5831	0.881426	0.00422949	0.0220891	yes
XLOC_000163	Fastkd2	chr1:63777149-63815841	9.21528	5.87297	-0.649936	0.00118351	0.00771319	yes
XLOC_000165	Creb1	chr1:64579377-64651122	18.723	20.112	0.103252	0.535591	0.707341	no
XLOC_000166	Ccnyl1	chr1:64737669-64772220	16.7051	11.8888	-0.490686	0.00715851	0.0338742	yes
XLOC_000167	Pikfyve	chr1:65233258-65325739	6.49453	5.5135	-0.236256	0.160791	0.328955	no
XLOC_000170	Mtap2	chr1:66221897-66489160	3.94531	22.4079	2.50579	0	0	yes
XLOC_000172	Rpe	chr1:66747466-66864169	13.4326	13.5605	0.0136719	0.940833	0.973704	no
XLOC_000174	Spag16	chr1:69873561-70771706	1.36317	0.529643	-1.36387	0.000134261	0.00121336	yes
XLOC_000176	Atic	chr1:71603729-71625977	86.6487	34.3803	-1.3336	0	0	yes
XLOC_000180	Xrcc5	chr1:72353994-72441527	30.7462	23.2707	-0.401893	0.0138275	0.0566872	no
XLOC_000181	Smarcal1	chr1:72629824-72683364	4.46108	4.70494	0.0767859	0.677367	0.813802	no
XLOC_000182	Rpl37a	chr1:72757833-72760387	904.089	518.738	-0.801458	6.42502e-07	1.09123e-05	yes
XLOC_000183	Igfbp2	chr1:72870446-72899059	90.1452	54.4219	-0.728062	6.26565e-05	0.000627582	yes
XLOC_000187	Cxcr2	chr1:74200567-74207820	4.26648	2.55925	-0.737324	0.00236055	0.0136877	yes
XLOC_000188	Arpc2	chr1:74283109-74314787	130.538	117.734	-0.148934	0.355458	0.550382	no
XLOC_000190	Pnkd	chr1:74331607-74400266	22.2212	17.8265	-0.317912	0.303806	0.49766	no
XLOC_000193	Ctdsp1	chr1:74438182-74443859	11.4144	7.30836	-0.643234	0.00158888	0.0098264	yes
XLOC_000196	Rqcd1	chr1:74455957-74634704	27.4683	18.0252	-0.607756	0.0217923	0.0806509	no
XLOC_000198	Bcs1l	chr1:74634934-74639017	3.25724	3.0101	-0.113837	0.771436	0.875026	no
XLOC_000199	Stk36	chr1:74648028-74683770	1.30441	2.36479	0.85832	0.00301373	0.0167642	yes
XLOC_000200	Ttll4	chr1:74708271-74749177	17.0551	15.1801	-0.168026	0.334124	0.528945	no
XLOC_000205	Fam134a	chr1:75139359-75144513	5.71009	5.68183	-0.00715731	0.977997	0.990316	no
XLOC_000206	Zfand2b	chr1:75165219-75168200	2.85012	2.32708	-0.292502	0.56866	0.73278	no
XLOC_000207	Ankzf1	chr1:75188708-75207353	1.62218	0.933083	-0.797856	0.0952789	0.234708	no
XLOC_000208	Stk16	chr1:75207403-75215828	8.0002	8.77838	0.133918	0.55982	0.726229	no
XLOC_000209	Dnajb2	chr1:75232997-75242270	1.96487	2.72376	0.471165	0.288252	0.481494	no
XLOC_000211	Speg	chr1:75371871-75428881	6.91955	1.61379	-2.10023	5.26782e-08	1.1241e-06	yes
XLOC_000212	Gmppa	chr1:75432517-75439751	9.41259	5.92711	-0.667263	0.0151113	0.0606258	no
XLOC_000215	Inha	chr1:75503651-75506929	0.417489	1.07981	1.37096	0.0833593	0.214884	no
XLOC_000216	Stk11ip	chr1:75518103-75533910	3.86524	4.89981	0.34217	0.125179	0.280403	no
XLOC_000217	Slc4a3	chr1:75542840-75559105	1.13641	1.32879	0.225628	0.727092	0.846188	no
XLOC_000219	Sgpp2	chr1:78306920-78485468	2.61292	0.450184	-2.53708	0.00139025	0.0088232	yes
XLOC_000221	Acsl3,Utp14b	chr1:78654399-78704318	29.3954	33.2532	0.177904	0.332785	0.52713	no
XLOC_000223	Mrpl44	chr1:79772592-79778020	11.4517	8.6913	-0.397916	0.0999789	0.241995	no
XLOC_000226	Rhbdd1	chr1:82313153-82442657	1.42868	1.46187	0.0331388	0.923473	0.9647	no
XLOC_000228	Mff	chr1:82721469-82749046	24.4788	33.0429	0.432809	0.017708	0.0685355	no
XLOC_000229	Agfg1	chr1:82836057-82901180	15.7162	11.0663	-0.506084	0.0210857	0.0786442	no
XLOC_000233	Fbxo36	chr1:84717763-84897061	2.12671	2.15246	0.0173639	0.995072	0.997624	no
XLOC_000235	Sp140	chr1:87473474-87541611	1.16386	1.44234	0.309498	0.421769	0.613875	no
XLOC_000237	Cab39	chr1:87690021-87748152	19.5852	23.8371	0.283442	0.0787577	0.206224	no
XLOC_000238	Itm2c	chr1:87791084-87805273	9.01743	5.64094	-0.676782	0.00922229	0.0415698	yes
XLOC_000242	Psmd1	chr1:87961193-88035870	71.1204	76.8212	0.11124	0.496092	0.673645	no
XLOC_000243	Armc9	chr1:88051354-88174859	5.38225	3.80795	-0.499193	0.125167	0.280403	no
XLOC_000244	B3gnt7	chr1:88199795-88203880	1.2943	0.452829	-1.51513	0.00153022	0.00954072	yes
XLOC_000245	C130036L24Rik	chr1:88256148-88265204	1.75489	0.728901	-1.26759	0.0479512	0.145043	no
XLOC_000247	Ptma	chr1:88423310-88427273	1845.8	1032.36	-0.8383	0.000140952	0.00126606	yes
XLOC_000248	Cops7b	chr1:88479539-88503850	13.9143	11.2202	-0.310473	0.131817	0.289473	no
XLOC_000249	Dis3l2	chr1:88600378-88946672	5.17191	5.66781	0.132093	0.588227	0.747827	no
XLOC_000254	Eif4e2	chr1:89110488-89137063	25.8128	17.9048	-0.52774	0.00988972	0.0438089	yes
XLOC_000255	Efhd1	chr1:89160938-89207366	2.04864	1.38399	-0.565833	0.19633	0.373365	no
XLOC_000256	Gigyf2	chr1:89223572-89347385	14.5482	14.1411	-0.0409457	0.802448	0.893679	no
XLOC_000260	Atg16l1	chr1:89652585-89689139	3.55251	2.83508	-0.325449	0.287791	0.481098	no
XLOC_000263	Dgkd	chr1:89749861-89905126	7.03715	7.59147	0.109388	0.63646	0.783944	no
XLOC_000271	Sh3bp4	chr1:90966986-91051788	3.63427	4.14933	0.191211	0.49337	0.671617	no
XLOC_000272	Agap1	chr1:91351385-91792195	8.73256	8.82347	0.0149418	0.932767	0.969225	no
XLOC_000273	Cxcr7	chr1:92100577-92112863	1.18421	2.44015	1.04304	0.0039647	0.0209521	yes
XLOC_000274	Cops8	chr1:92499999-92509916	21.0072	19.7694	-0.0876147	0.630351	0.779378	no
XLOC_000277	Lrrfip1	chr1:92895303-93025521	12.8874	6.18747	-1.05854	5.45802e-07	9.38652e-06	yes
XLOC_000280	Ube2f	chr1:93146885-93184197	13.7416	10.1807	-0.432708	0.0676426	0.185414	no
XLOC_000281	Scly	chr1:93194914-93217657	4.3964	2.69361	-0.706779	0.0352076	0.115757	no
XLOC_000285	Traf3ip1	chr1:93391244-93425884	5.29751	4.70626	-0.170732	0.43095	0.621585	no
XLOC_000286	Asb1	chr1:93437141-93456167	0.869007	1.01601	0.225482	0.467374	0.650051	no
XLOC_000293	Gpc1	chr1:94728262-94756777	9.15225	20.4941	1.16301	2.20967e-08	5.02318e-07	yes
XLOC_000295	Dusp28	chr1:94803565-94805197	1.19778	2.74561	1.19677	0.0167741	0.0658073	no
XLOC_000296	Rnpepl1	chr1:94807401-94820253	5.43837	4.55609	-0.255377	0.344997	0.540083	no
XLOC_000297	Capn10	chr1:94830119-94847167	4.62144	4.53291	-0.0279057	0.935287	0.970947	no
XLOC_000302	Ppp1r7	chr1:95239510-95268128	34.8475	29.0301	-0.263504	0.14076	0.302321	no
XLOC_000304	Sept2	chr1:95375569-95406309	61.7991	57.3103	-0.108792	0.510368	0.686649	no
XLOC_000305	Farp2	chr1:95408680-95532304	2.72082	2.8062	0.0445765	0.849251	0.922403	no
XLOC_000306	Bok	chr1:95582270-95592356	8.66497	7.43024	-0.221785	0.470455	0.652772	no
XLOC_000307	Atg4b	chr1:95651609-95686106	6.20569	4.51444	-0.459042	0.0419184	0.131642	no
XLOC_000308	Ing5	chr1:95700541-95718677	12.797	6.96427	-0.877757	4.10918e-07	7.30305e-06	yes
XLOC_000309	D2hgdh	chr1:95721816-95751516	2.66735	3.14555	0.237902	0.537499	0.708559	no
XLOC_000315	Fam174a	chr1:97210204-97232802	2.29219	1.49661	-0.615032	0.0640792	0.179009	no
XLOC_000316	Gin1	chr1:99666736-99689548	2.01744	3.52695	0.805895	0.04169	0.131011	no
XLOC_000321	Cdh20	chr1:106665395-106892058	7.89182	1.66195	-2.24748	0	0	yes
XLOC_000322	2310035C23Rik	chr1:107560437-107651770	5.95161	6.01353	0.0149332	0.943902	0.975079	no
XLOC_000324	Zcchc2	chr1:107886982-107930843	4.88363	4.9077	0.00709352	0.973068	0.988036	no
XLOC_000325	Phlpp1	chr1:108068445-108290822	4.91293	9.9505	1.01818	3.62654e-08	7.93322e-07	yes
XLOC_000334	Cdh7	chr1:111879377-112035578	0.497145	2.17002	2.12597	2.4028e-07	4.52232e-06	yes
XLOC_000336	Mki67ip	chr1:120218419-120230408	49.924	18.0541	-1.4674	0	0	yes
XLOC_000337	Clasp1	chr1:120285634-120506610	28.5884	35.0326	0.293272	0.0715054	0.192474	no
XLOC_000339	Tmem185b	chr1:121422730-121426785	2.82827	2.57792	-0.133715	0.644256	0.789816	no
XLOC_000341	3110009E18Rik	chr1:122017763-122084766	5.12276	2.61222	-0.971647	0.111494	0.259875	no
XLOC_000345	Ccdc93	chr1:123327643-123403037	3.73944	3.56479	-0.0690052	0.738689	0.854188	no
XLOC_000346	Slc35f5	chr1:127457592-127492398	5.55182	3.89794	-0.510248	0.057041	0.164853	no
XLOC_000348	Mgat5	chr1:129101562-129384955	2.89631	4.99153	0.785264	0.00016265	0.00143404	yes
XLOC_000350	Ccnt2	chr1:129670740-129704814	11.4429	11.7311	0.0358806	0.830088	0.910111	no
XLOC_000351	Rab3gap1	chr1:129765349-129840453	2.27121	1.82328	-0.31692	0.218822	0.401386	no
XLOC_000352	R3hdm1	chr1:129999882-130134508	32.9208	39.0679	0.246981	0.324261	0.518432	no
XLOC_000354	Ubxn4	chr1:130140757-130175954	19.3613	24.2583	0.325303	0.0427556	0.133331	no
XLOC_000356	Yod1	chr1:132585619-132625830	1.57993	2.56955	0.701651	0.00398214	0.0210064	yes
XLOC_000362	Eif2d	chr1:133049783-133141755	14.2661	10.2362	-0.478904	0.0372502	0.120787	no
XLOC_000363	Fam72a	chr1:133424565-133436449	1.57946	1.35429	-0.221898	0.528183	0.7013	no
XLOC_000369	Slc41a1	chr1:133724588-133745440	3.23614	3.97152	0.295417	0.201333	0.37949	no
XLOC_000371	Nucks1	chr1:133807034-133832898	166.858	135.641	-0.298828	0.140134	0.301416	no
XLOC_000373	Elk4	chr1:133904181-133964639	4.04172	5.43947	0.428496	0.142025	0.304355	no
XLOC_000374	Lemd1	chr1:134087735-134153959	1.52862	2.14194	0.486686	0.330035	0.524296	no
XLOC_000375	Mir135b	chr1:134087735-134153959	0.963967	1.08669	0.172892	0.713095	0.837486	no
XLOC_000377	Nuak2	chr1:134212701-134230130	8.9988	7.32844	-0.296227	0.180519	0.354318	no
XLOC_000378	Dstyk	chr1:134314029-134364329	1.79161	2.32998	0.379064	0.170982	0.341839	no
XLOC_000379	Rbbp5,Tmem81	chr1:134373943-134405216	19.6267	20.999	0.0975015	0.58213	0.743085	no
XLOC_000381	Lrrn2	chr1:134776931-134836582	0.319389	1.64223	2.36227	0.000156393	0.00138524	yes
XLOC_000382	Pik3c2b	chr1:134942588-135005308	3.37584	10.3399	1.61491	2.22045e-16	1.5978e-14	yes
XLOC_000383	Ppp1r15b	chr1:135027742-135036465	19.9618	18.7466	-0.0906174	0.581986	0.743049	no
XLOC_000384	Plekha6	chr1:135142673-135200012	1.12904	3.80199	1.75166	3.17802e-09	8.31019e-08	yes
XLOC_000395	Cyb5r1	chr1:136302566-136308487	4.25225	2.96021	-0.522526	0.117216	0.268358	no
XLOC_000396	Adipor1	chr1:136312043-136329953	24.4259	20.7024	-0.238612	0.221752	0.404938	no
XLOC_000397	Klhl12	chr1:136352131-136387807	7.25419	6.0257	-0.267684	0.233815	0.420349	no
XLOC_000398	Rabif	chr1:136391236-136404461	12.4386	9.53751	-0.383141	0.0546886	0.159963	no
XLOC_000399	Kdm5b	chr1:136456754-136529455	25.7852	17.0855	-0.593766	0.000172634	0.00149723	yes
XLOC_000401	Ube2t	chr1:136859153-136870848	8.31931	4.7923	-0.795746	0.0179185	0.0691486	no
XLOC_000403	Arl8a	chr1:137043410-137052845	2.73047	7.24884	1.4086	1.30223e-05	0.000158865	yes
XLOC_000405	Csrp1	chr1:137625773-137648806	7.47223	5.59536	-0.417308	0.104046	0.248136	no
XLOC_000406	Phlda3	chr1:137662661-137665711	0.488304	1.29584	1.40803	0.0647606	0.180172	no
XLOC_000410	Tmem9	chr1:137904795-137931607	26.8229	28.3216	0.0784404	0.697547	0.827144	no
XLOC_000412	Kif21b	chr1:138027977-138075276	2.04546	4.99034	1.28671	6.76977e-08	1.40087e-06	yes
XLOC_000413	Ddx59	chr1:138308492-138336797	2.22068	2.62737	0.242619	0.483269	0.664029	no
XLOC_000414	Kif14	chr1:138362933-138428088	4.43793	5.75092	0	1	1	no
XLOC_000415	Zfp281	chr1:138521477-138529907	11.9023	10.7758	-0.143447	0.421278	0.613552	no
XLOC_000418	-	chr1:139795071-139831817	0.182403	1.42185	2.96257	6.12785e-06	8.05943e-05	yes
XLOC_000421	Dennd1b	chr1:140860285-141072619	2.60469	3.05455	0.22985	0.240152	0.427685	no
XLOC_000423	Zbtb41	chr1:141318959-141349584	4.10018	6.20941	0.598771	0.000372407	0.00292022	yes
XLOC_000424	Aspm	chr1:141351349-141390665	15.8185	24.2516	0.616467	0.000119468	0.00110151	yes
XLOC_000426	Kcnt2	chr1:142142833-142552979	1.04554	0.566312	-0.884581	0.0199763	0.0753396	no
XLOC_000428	Glrx2	chr1:145586478-145596808	3.43145	10.6049	1.62784	4.55636e-13	2.17371e-11	yes
XLOC_000429	Uchl5	chr1:145624407-145654596	65.3543	54.7794	-0.254649	0.152981	0.318573	no
XLOC_000433	Tpr	chr1:152208440-152313295	78.1907	83.8362	0.100576	0.596385	0.75404	no
XLOC_000435	Ivns1abp	chr1:153191627-153211575	140.368	121.495	-0.208311	0.249794	0.438854	no
XLOC_000436	1190005F20Rik	chr1:153275777-153305313	10.9568	10.536	-0.0564969	0.774166	0.876564	no
XLOC_000438	Edem3	chr1:153602503-153669458	7.74852	9.84395	0.345316	0.0402047	0.127579	no
XLOC_000441	Arpc5	chr1:154613655-154622715	31.0762	32.5947	0.0688265	0.681885	0.816615	no
XLOC_000443	Nmnat2	chr1:154802147-154966391	7.5849	2.45517	-1.6273	0.000302249	0.00243491	yes
XLOC_000444	1700012A16Rik	chr1:155272338-155301048	0.761822	1.28556	0.754869	0.178471	0.351922	no
XLOC_000445	Rgs8	chr1:155500166-155544795	0.535805	6.18906	3.52994	0	0	yes
XLOC_000446	Rgs16	chr1:155587482-155592598	0.95049	6.34108	2.73799	1.23138e-10	4.06376e-09	yes
XLOC_000447	Rnasel	chr1:155596555-155611351	0.196426	2.24142	3.51235	1.76542e-10	5.67932e-09	yes
XLOC_000450	Glul	chr1:155747074-155756844	25.8418	20.2249	-0.353571	0.0343837	0.113766	no
XLOC_000452	Stx6	chr1:157005832-157056111	6.51743	5.61068	-0.216126	0.409888	0.603281	no
XLOC_000453	Acbd6	chr1:157405249-157534363	14.8859	10.9174	-0.447318	0.123779	0.278115	no
XLOC_000454	Tor1aip2	chr1:157851728-157915989	34.2485	26.3144	-0.380187	0.0411266	0.129828	no
XLOC_000456	Abl2	chr1:158488917-158579750	5.06647	3.9044	-0.37588	0.0522339	0.154913	no
XLOC_000458	2810025M15Rik	chr1:159064317-159350367	43.286	23.5872	-0.875899	0.00832695	0.0382955	yes
XLOC_000461	Astn1	chr1:160292434-160621917	3.70677	10.4197	1.49107	6.66134e-16	4.53753e-14	yes
XLOC_000463	Rfwd2	chr1:161162456-161277711	35.4985	30.5453	-0.216805	0.180884	0.354706	no
XLOC_000467	Mrps14	chr1:162125390-162131317	19.5493	10.3473	-0.917869	2.95728e-07	5.45331e-06	yes
XLOC_000468	Rc3h1	chr1:162836541-162905107	13.5521	10.5052	-0.367415	0.0198067	0.0748803	no
XLOC_000470	Gas5,Mir5117	chr1:162965260-163000770	238.231	161.831	-0.557871	0.0125459	0.0526395	no
XLOC_000471	Snord47	chr1:162965260-163000770	1372.64	5542.41	2.01356	0.866989	0.933039	no
XLOC_000472	Cenpl	chr1:163001022-163016474	12.9206	19.3343	0.581493	0.0147741	0.0596352	no
XLOC_000473	Ankrd45	chr1:163072842-163100768	3.86297	4.51589	0.225301	0.318744	0.512954	no
XLOC_000476	Pigc	chr1:163872219-163909767	1.88307	2.43041	0.368114	0.238156	0.425337	no
XLOC_000479	Vamp4	chr1:164500769-164529209	12.5017	9.26906	-0.431632	0.0513493	0.153025	no
XLOC_000481	Kifap3	chr1:165709809-165847231	14.0036	15.6947	0.164483	0.326982	0.521105	no
XLOC_000482	Scyl3	chr1:165860194-165924912	2.68772	2.93834	0.128618	0.738745	0.854193	no
XLOC_000483	2810422O20Rik	chr1:165925018-165928795	3.21192	2.32841	-0.464094	0.213934	0.395573	no
XLOC_000488	Slc19a2	chr1:166179185-166195499	0.844326	2.54555	1.5921	6.50985e-06	8.50547e-05	yes
XLOC_000489	4930455F23Rik	chr1:166205728-166217978	4.14201	6.97791	0.752464	0.0031769	0.017494	yes
XLOC_000490	Nme7	chr1:166237721-166388486	13.7218	10.3404	-0.40818	0.088377	0.223671	no
XLOC_000493	Gpr161	chr1:167212251-167257547	3.15338	4.69832	0.575246	0.00344556	0.0186864	yes
XLOC_000494	Brp44	chr1:167391338-167411345	8.53715	14.0783	0.721648	0.0129064	0.0536579	no
XLOC_000496	Creg1	chr1:167693910-167705435	2.91506	2.29209	-0.346864	0.265495	0.457555	no
XLOC_000500	Ildr2	chr1:168184269-168246963	12.5851	20.9514	0.735327	4.3871e-06	5.98527e-05	yes
XLOC_000501	Tada1	chr1:168309297-168339959	14.8309	14.7512	-0.00777735	0.978729	0.990686	no
XLOC_000502	Fam78b	chr1:168931547-169021433	3.38867	1.98972	-0.768151	0.00508957	0.0256976	yes
XLOC_000503	Tmco1	chr1:169238800-169264109	13.2771	5.53196	-1.26307	4.56524e-13	2.17371e-11	yes
XLOC_000504	Aldh9a1	chr1:169280121-169298661	17.4183	11.8531	-0.55534	0.00586689	0.0287502	yes
XLOC_000506	Lmx1a	chr1:169619392-169778871	1.14831	2.07738	0.855258	0.0239934	0.0869198	no
XLOC_000508	1700084C01Rik	chr1:171859041-171867265	1.0793	0.472995	-1.1902	0.0407339	0.128853	no
XLOC_000519	Adamts4	chr1:173180552-173190732	0.682254	1.2519	0.875734	0.0264362	0.0934815	no
XLOC_000520	B4galt3	chr1:173200458-173211317	4.82491	4.24421	-0.185004	0.583622	0.744493	no
XLOC_000521	Dedd	chr1:173259275-173275776	4.25516	5.16472	0.279478	0.257126	0.447423	no
XLOC_000522	Pfdn2	chr1:173275829-173288301	106.51	51.4439	-1.04992	1.65988e-08	3.8746e-07	yes
XLOC_000525	Usf1	chr1:173341811-173348883	5.52204	3.82159	-0.531029	0.0958907	0.23548	no
XLOC_000526	Tstd1	chr1:173349022-173350564	0.825653	1.34848	0.707722	0.365912	0.561079	no
XLOC_000527	F11r	chr1:173367691-173394724	3.89951	0.393585	-3.30855	2.22045e-16	1.5978e-14	yes
XLOC_000528	Alyref2	chr1:173433608-173436758	1.28505	1.93162	0.587992	0.298596	0.492582	no
XLOC_000534	Copa	chr1:173996143-174052463	40.0851	38.8062	-0.0467803	0.785788	0.8834	no
XLOC_000535	Pex19	chr1:174056885-174066814	10.238	11.0215	0.106383	0.579718	0.741421	no
XLOC_000536	Dcaf8	chr1:174078145-174126707	9.79151	10.1016	0.0449877	0.833827	0.912799	no
XLOC_000537	Igsf8	chr1:174242537-174249966	2.19817	3.81516	0.795438	0.0272518	0.095729	no
XLOC_000539	Pigm	chr1:174306661-174314230	20.7155	16.4538	-0.332283	0.0349847	0.11525	no
XLOC_000541	Igsf9	chr1:174412343-174429008	8.83673	5.4916	-0.686285	0.000965414	0.00652046	yes
XLOC_000542	Tagln2	chr1:174430376-174437506	21.553	12.3235	-0.806476	0.0001717	0.00149454	yes
XLOC_000567	Fmn2	chr1:176431955-176752860	2.81828	4.23613	0.587929	0.00396621	0.0209542	yes
XLOC_000570	Exo1	chr1:177810685-177843626	12.9743	11.9944	-0.113302	0.518933	0.693422	no
XLOC_000571	Sdccag8	chr1:178744942-178950563	2.65868	5.17031	0.959539	0.000517415	0.00383285	yes
XLOC_000572	Zfp238	chr1:179373001-179381074	5.45313	11.3638	1.05929	3.50481e-07	6.3408e-06	yes
XLOC_000575	Pppde1	chr1:180117547-180182728	20.1334	17.4327	-0.207794	0.195797	0.372836	no
XLOC_000576	Fam36a	chr1:180249283-180252824	13.2774	17.7393	0.41797	0.210669	0.391724	no
XLOC_000577	Efcab2	chr1:180335972-180415008	1.17589	1.91213	0.701428	0.0119532	0.05063	no
XLOC_000579	Cnst	chr1:181476659-181557604	3.37313	4.81012	0.511984	0.0183891	0.0705947	no
XLOC_000580	Sccpdh	chr1:181598361-181617315	18.5687	16.7275	-0.150654	0.404198	0.597756	no
XLOC_000581	Cdc42bpa	chr1:181890570-182126151	9.18478	14.9764	0.705373	0.000169579	0.00148012	yes
XLOC_000582	Itpkb	chr1:182257099-182355458	0.385338	1.07286	1.47726	0.000622695	0.00449944	yes
XLOC_000583	Parp1	chr1:182499105-182531385	78.7973	85.173	0.112251	0.487909	0.667744	no
XLOC_000584	Lin9	chr1:182571464-182620818	5.73803	5.78486	0.0117273	0.958758	0.981841	no
XLOC_000585	Acbd3	chr1:182656173-182684335	10.2475	9.75338	-0.0712941	0.688814	0.820907	no
XLOC_000586	BC031781	chr1:182781281-182798245	22.0789	11.1882	-0.980685	5.65737e-09	1.41738e-07	yes
XLOC_000588	Pycr2	chr1:182834404-182838219	11.0479	7.42018	-0.574246	0.0232425	0.0848854	no
XLOC_000592	Cnih4	chr1:183081061-183099125	9.34368	7.41217	-0.334095	0.0708976	0.191485	no
XLOC_000594	Srp9	chr1:184054867-184062546	32.1962	22.3213	-0.528469	0.00309876	0.0171574	yes
XLOC_000596	Trp53bp2	chr1:184339297-184392567	17.4287	19.8775	0.189666	0.273519	0.46677	no
XLOC_000598	Susd4	chr1:184695036-184826721	2.19013	1.21547	-0.849506	0.0115702	0.0495115	yes
XLOC_000600	Dusp10	chr1:185858339-185899515	0.385617	1.49901	1.95877	0.000758082	0.00533668	yes
XLOC_000602	Rab3gap2	chr1:187028039-187153280	3.86677	4.17992	0.112347	0.640506	0.787103	no
XLOC_000603	Mir664,Snora36b	chr1:187028039-187153280	0	15.3343	1.79769e+308	0.422647	0.6145	no
XLOC_000606	Bpnt1	chr1:187156037-187183135	10.3751	4.844	-1.09885	3.66944e-06	5.14932e-05	yes
XLOC_000607	Eprs	chr1:187186973-187252234	75.2512	64.49	-0.222639	0.176084	0.348617	no
XLOC_000612	Gpatch2	chr1:189039389-189175944	6.19158	5.80519	-0.0929629	0.647116	0.79188	no
XLOC_000615	Ptpn14	chr1:191552146-191700572	6.89564	2.5049	-1.46093	2.22045e-16	1.5978e-14	yes
XLOC_000616	Angel2	chr1:192748986-192803175	16.5893	20.9831	0.338969	0.0916962	0.229253	no
XLOC_000617	A230020J21Rik	chr1:192829710-192853660	1.65913	0.687903	-1.27015	0.170817	0.341728	no
XLOC_000619	Nsl1	chr1:192886899-192909231	8.50002	7.35398	-0.208941	0.360585	0.556044	no
XLOC_000621	-	chr1:193048339-193050131	1.14099	0.524448	-1.12142	0.159589	0.32737	no
XLOC_000622	Tmem206	chr1:193149843-193220920	4.8829	5.27608	0.11173	0.671563	0.809317	no
XLOC_000623	Ints7	chr1:193399476-193447781	19.8205	16.2512	-0.286443	0.132972	0.290908	no
XLOC_000624	Lpgat1	chr1:193541902-193608134	3.51519	13.8344	1.97659	0	0	yes
XLOC_000625	Nek2	chr1:193645351-193656928	21.3247	16.0531	-0.409669	0.0154111	0.0616475	no
XLOC_000626	Slc30a1	chr1:193717950-193737126	5.32592	3.4764	-0.615439	0.00136577	0.00868515	yes
XLOC_000632	A130010J15Rik	chr1:194999662-195027740	3.67744	2.18107	-0.753667	0.00565277	0.0279225	yes
XLOC_000634	Plxna2	chr1:196446022-196643062	2.87103	3.16382	0.140099	0.44591	0.633737	no
XLOC_000635	Cd34	chr1:196765014-196803153	0.408343	1.45835	1.83648	0.0094174	0.0422618	yes
XLOC_000640	Mrpl15	chr1:4763278-4775807	32.2994	15.7593	-1.03531	0.00601942	0.0293474	yes
XLOC_000641	Rgs20	chr1:4897271-5060366	1.55983	0.96319	-0.695496	0.100258	0.242487	no
XLOC_000645	Mybl1	chr1:9657521-9690290	1.67146	3.46973	1.05371	3.77152e-05	0.000405111	yes
XLOC_000646	Vcpip1	chr1:9709888-9761337	11.7273	13.5636	0.209869	0.262758	0.454619	no
XLOC_000647	Snhg6,Snord87	chr1:9898718-9934199	28.7358	14.62	-0.974904	0.0190932	0.0726421	no
XLOC_000649	Cops5	chr1:10014911-10027979	98.5057	84.9066	-0.21433	0.181224	0.354937	no
XLOC_000650	Arfgef1	chr1:10127587-10222751	14.738	12.8066	-0.202654	0.200762	0.378858	no
XLOC_000652	Slco5a1	chr1:12856629-12982755	3.81742	3.26034	-0.227577	0.244271	0.432502	no
XLOC_000654	Ncoa2	chr1:13129239-13364164	10.4223	12.0501	0.209382	0.201644	0.379845	no
XLOC_000655	Tram1	chr1:13554782-13579945	34.0805	15.8427	-1.10513	7.99671e-12	3.08599e-10	yes
XLOC_000656	Lactb2	chr1:13614948-13650623	5.45693	3.02803	-0.849712	0.00122321	0.00791328	yes
XLOC_000657	Gm5523	chr1:13775765-13777010	11.1615	8.02171	-0.476544	0.0613712	0.173388	no
XLOC_000658	Eya1	chr1:14159033-14300336	4.94979	1.70167	-1.54042	5.12571e-09	1.29949e-07	yes
XLOC_000663	Rpl7	chr1:16091375-16094514	921.249	436.267	-1.07838	1.6644e-09	4.5577e-08	yes
XLOC_000664	Stau2	chr1:16218890-16509383	6.32583	16.8636	1.41458	9.86935e-11	3.32002e-09	yes
XLOC_000665	Ube2w	chr1:16558587-16609367	4.42541	4.80551	0.118878	0.633472	0.781588	no
XLOC_000666	Tceb1	chr1:16628436-16647209	49.9641	28.0732	-0.831696	5.69304e-05	0.000580248	yes
XLOC_000667	Jph1	chr1:16982060-17087970	2.90635	3.82203	0.395127	0.104337	0.248676	no
XLOC_000674	Mcm3	chr1:20793094-20810294	73.7232	61.9924	-0.250028	0.113391	0.263017	no
XLOC_000676	Tram2	chr1:20986374-21069311	7.60419	5.33513	-0.511272	0.091315	0.228545	no
XLOC_000679	Rims1	chr1:22278502-22812563	1.65377	0.773617	-1.09607	0.00934349	0.0420216	yes
XLOC_000681	Ogfrl1	chr1:23373242-23390014	3.61087	3.80967	0.0773203	0.703523	0.831294	no
XLOC_000682	Smap1	chr1:23768764-23929149	21.4791	17.1604	-0.32385	0.0702475	0.190319	no
XLOC_000683	1110058L19Rik	chr1:24002777-24012479	12.098	7.66548	-0.658318	0.0333234	0.110998	no
XLOC_000684	Fam135a	chr1:24017064-24107180	11.5521	10.6018	-0.123847	0.45168	0.638413	no
XLOC_000686	Bai3	chr1:25124278-25886552	0.556486	1.80705	1.69922	4.96027e-07	8.61566e-06	yes
XLOC_000690	Phf3	chr1:30859186-30930680	21.4608	18.7935	-0.191472	0.260913	0.452204	no
XLOC_000691	Ptp4a1	chr1:30997147-31006605	84.1867	58.6522	-0.521407	0.00218352	0.0127969	yes
XLOC_000697	Prim2	chr1:33510655-33726603	24.698	24.4036	-0.0173014	0.921186	0.963477	no
XLOC_000698	Bag2	chr1:33802328-33814595	10.8001	6.71555	-0.685463	0.00545038	0.027154	yes
XLOC_000699	Zfp451	chr1:33818597-33871272	6.90757	7.86941	0.188078	0.317651	0.51197	no
XLOC_000703	Ccdc115	chr1:34493514-34496517	20.4132	27.4076	0.425072	0.0223943	0.0824563	no
XLOC_000706	Fam168b	chr1:34869971-34899895	23.9622	46.1488	0.945533	1.05345e-08	2.53957e-07	yes
XLOC_000707	Uggt1	chr1:36196872-36301147	8.09045	8.39112	0.052643	0.753382	0.863554	no
XLOC_000709	4632411B12Rik	chr1:36392574-36426026	5.40935	7.17603	0.40773	0.0594713	0.169798	no
XLOC_000710	Lman2l	chr1:36475651-36502084	4.53607	4.07968	-0.152987	0.601204	0.75798	no
XLOC_000713	Sema4c	chr1:36605463-36615226	3.58807	2.88333	-0.31547	0.275039	0.468333	no
XLOC_000715	Actr1b	chr1:36754959-36766788	52.7887	46.9024	-0.17057	0.346969	0.541884	no
XLOC_000716	Tmem131	chr1:36849033-36996372	23.0374	23.1425	0.00656335	0.966945	0.98565	no
XLOC_000717	6330578E17Rik	chr1:37473929-37486948	48.4637	28.1204	-0.785288	6.2331e-07	1.06051e-05	yes
XLOC_000718	Mgat4a	chr1:37495995-37593213	1.42754	2.51291	0.815829	0.000633481	0.00456359	yes
XLOC_000721	Tsga10	chr1:37811620-37922045	2.23261	5.44429	1.28601	7.23266e-08	1.49021e-06	yes
XLOC_000722	Mitd1	chr1:37935479-37947256	8.40223	4.78003	-0.813752	0.00427059	0.0222431	yes
XLOC_000725	Txndc9	chr1:38040711-38054110	9.65593	8.81633	-0.131237	0.464636	0.648505	no
XLOC_000726	Rev1	chr1:38054854-38186507	7.35748	6.93891	-0.084504	0.872897	0.936239	no
XLOC_000727	Aff3	chr1:38234074-38721800	6.75484	4.78544	-0.497271	0.0118355	0.0503207	no
XLOC_000728	Lonrf2	chr1:38850449-38878110	2.87338	4.92168	0.7764	0.000486557	0.00364485	yes
XLOC_000729	Chst10	chr1:38920663-38955005	1.45107	1.88332	0.376159	0.334405	0.529257	no
XLOC_000730	Tbc1d8	chr1:39424671-39535592	4.87021	2.96976	-0.713637	0.53261	0.705129	no
XLOC_000731	Snord89	chr1:39603723-39606178	1.80484	1.18478	-0.607252	0.116845	0.26788	no
XLOC_000732	Rnf149	chr1:39608140-39634193	16.2609	12.5051	-0.378889	0.0560742	0.16287	no
XLOC_000740	2610017I09Rik	chr1:42705043-42751670	0.956192	32.1328	5.0706	2.84898e-10	8.9251e-09	yes
XLOC_000741	Tgfbrap1	chr1:43104077-43155467	3.05589	4.33768	0.505331	0.0354446	0.116295	no
XLOC_000743	Uxs1	chr1:43805581-43884619	7.22145	4.83854	-0.577716	0.0743807	0.197684	no
XLOC_000745	1700029F09Rik	chr1:44143456-44159292	21.3665	16.4769	-0.374904	0.0559748	0.162639	no
XLOC_000746	Kdelc1	chr1:44161960-44175795	14.8822	9.6153	-0.630179	0.00134474	0.00856563	yes
XLOC_000749	Col5a2	chr1:45431175-45560127	0.316784	2.18619	2.78685	4.24771e-13	2.03773e-11	yes
XLOC_000753	Slc39a10	chr1:46864388-46910354	47.5768	33.6398	-0.500087	0.00173313	0.0105515	yes
XLOC_000755	Obfc2a	chr1:51524535-51535245	6.94582	1.5395	-2.17368	4.44089e-16	3.1023e-14	yes
XLOC_000756	Myo1b	chr1:51806609-51988466	16.704	23.3053	0.480468	0.00266611	0.0151745	yes
XLOC_000757	Gls	chr1:52220293-52290076	15.7704	11.3366	-0.476224	0.0128448	0.0534427	no
XLOC_000758	Nab1	chr1:52512692-52557292	1.85125	1.90133	0.0385094	0.872959	0.936253	no
XLOC_000760	Inpp1	chr1:52846263-52874532	1.10951	0.889226	-0.319296	0.587758	0.747577	no
XLOC_000763	Pms1	chr1:53244593-53353840	6.48312	5.9461	-0.124745	0.533628	0.705593	no
XLOC_000764	Asnsd1	chr1:53401487-53409543	34.4342	26.8837	-0.357113	0.0275368	0.0964842	no
XLOC_000765	Dnahc7a	chr1:53453845-53763655	0.976954	2.07456	1.08644	0.159387	0.327026	no
XLOC_000766	Stk17b	chr1:53811430-53842059	1.52667	2.16728	0.505494	0.0871058	0.221361	no
XLOC_000768	Gtf3c3	chr1:54452845-54495827	20.4329	17.1722	-0.250815	0.165671	0.335352	no
XLOC_000769	Pgap1	chr1:54529843-54614528	5.5425	8.129	0.552542	0.000631515	0.00455457	yes
XLOC_000770	Ankrd44	chr1:54702183-54983231	1.14076	2.42101	1.08562	2.3179e-05	0.000264562	yes
XLOC_000771	Sf3b1	chr1:55042012-55084326	57.9097	70.5066	0.283953	0.104421	0.248783	no
XLOC_000772	Hspd1	chr1:55134677-55144776	715.207	414.991	-0.785281	0.000240956	0.00200093	yes
XLOC_000776	Satb2	chr1:56850824-57028178	2.87903	3.89495	0.436021	0.0398728	0.126968	no
XLOC_000778	4930558J18Rik	chr1:57416065-57434388	1.18844	1.21299	0.0294987	0.962091	0.983728	no
XLOC_000779	1110034B05Rik	chr1:57445087-57474787	11.8971	8.34798	-0.511116	0.0462039	0.141006	no
XLOC_000780	Kctd18	chr1:58011934-58026928	5.55985	6.22527	0.163089	0.528093	0.70123	no
XLOC_000781	Clk1	chr1:58468831-58480932	44.7826	36.5776	-0.291978	0.0995642	0.241449	no
XLOC_000782	Ppil3	chr1:58487836-58561791	27.2181	13.0495	-1.06058	0.0184077	0.0706378	no
XLOC_000783	Orc2	chr1:58487836-58561791	25.3156	18.021	-0.490346	0.015073	0.060505	no
XLOC_000784	Fam126b	chr1:58579515-58643177	2.30127	1.66348	-0.468223	0.0188373	0.0718545	no
XLOC_000786	Trak2	chr1:58957293-59030326	2.76084	3.34049	0.27495	0.182712	0.356647	no
XLOC_000788	Als2cr4	chr1:59157436-59176940	10.2219	6.32761	-0.691931	0.00198801	0.0117934	yes
XLOC_000789	Als2,Mpp4	chr1:59177778-59294075	5.61709	5.8481	0.0581463	0.818404	0.903407	no
XLOC_000790	Sumo1	chr1:59696277-59727678	199.536	119.713	-0.737073	1.95527e-05	0.000227374	yes
XLOC_000792	Wdr12	chr1:60131622-60207878	20.7162	12.3775	-0.743037	0.000131917	0.00119613	yes
XLOC_000793	Raph1	chr1:60540028-60623609	12.7369	12.2913	-0.0513753	0.854036	0.925111	no
XLOC_000795	Ino80d	chr1:63094374-63160841	6.12902	5.77491	0	1	1	no
XLOC_000796	Ndufs1	chr1:63161044-63223396	25.3176	28.9006	0.190958	0.269213	0.462269	no
XLOC_000802	Klf7	chr1:64075680-64170472	3.98431	6.99564	0.812127	0.0399586	0.127153	no
XLOC_000803	Mettl21a	chr1:64651519-64664778	4.83291	3.13997	-0.622142	0.0213307	0.0793416	no
XLOC_000804	2810408I11Rik	chr1:64726442-64737233	17.9654	13.4372	-0.418981	0.169801	0.340548	no
XLOC_000805	Fzd5	chr1:64777131-64784324	33.7561	2.07709	-4.02251	0	0	yes
XLOC_000806	Plekhm3	chr1:64835694-65003398	2.54233	1.22894	-1.04873	1.35478e-06	2.12035e-05	yes
XLOC_000814	Idh1	chr1:65205189-65233053	18.1655	47.925	1.39957	1.33227e-15	8.64438e-14	yes
XLOC_000815	1110028C15Rik	chr1:66747466-66864169	1.4984	2.2802	0.60574	0.0638725	0.178636	no
XLOC_000816	Acadl	chr1:66877426-66909841	2.63134	10.3292	1.97286	2.23599e-12	9.5109e-11	yes
XLOC_000818	Lancl1	chr1:67047090-67085446	3.48206	3.59777	0.0471602	0.850277	0.923099	no
XLOC_000819	Erbb4	chr1:68086539-69154633	0.221488	1.5369	2.79472	3.85579e-07	6.90399e-06	yes
XLOC_000820	Ikzf2	chr1:69573992-69733800	3.35722	1.78452	-0.911734	0.0123372	0.0519346	no
XLOC_000821	Bard1	chr1:71072689-71149546	7.0611	6.46723	-0.126745	0.473212	0.655627	no
XLOC_000823	Fn1	chr1:71632092-71699745	15.4823	28.5921	0.884997	3.32029e-08	7.33876e-07	yes
XLOC_000825	Mreg	chr1:72205806-72258881	1.67305	0.721279	-1.21385	0.00120069	0.00780389	yes
XLOC_000826	Pecr	chr1:72304343-72330888	5.84629	2.19443	-1.41367	0.000201688	0.00171731	yes
XLOC_000829	Igfbp5	chr1:72904507-72921439	41.0101	25.4717	-0.687082	5.14138e-05	0.000532527	yes
XLOC_000835	Aamp	chr1:74326413-74331312	20.5919	12.336	-0.739197	0.000478345	0.00359199	yes
XLOC_000836	Tmbim1	chr1:74331607-74400266	2.24657	1.05844	-1.08578	0.0646946	0.180119	no
XLOC_000837	Usp37	chr1:74455957-74634704	14.9996	14.7291	-0.026257	0.890872	0.946502	no
XLOC_000838	Zfp142	chr1:74455957-74634704	5.46545	4.18482	-0.385174	0.26658	0.458752	no
XLOC_000839	Rnf25	chr1:74640174-74647971	2.90603	2.09274	-0.473658	0.282486	0.47589	no
XLOC_000846	Nhej1	chr1:75013919-75121800	8.16646	4.19882	-0.959726	0.00731354	0.034446	yes
XLOC_000848	1810031K17Rik	chr1:75131788-75138942	4.65054	5.08431	0.128653	0.595483	0.75355	no
XLOC_000849	Abcb6	chr1:75168206-75176857	1.6836	4.59081	1.4472	2.83434e-05	0.000315971	yes
XLOC_000850	Atg9a	chr1:75177439-75188497	2.16035	2.12675	-0.022614	0.938668	0.972774	no
XLOC_000851	Glb1l	chr1:75188708-75207353	2.08251	2.36542	0.183773	0.549965	0.718512	no
XLOC_000856	Dnpep	chr1:75305139-75314212	11.3856	9.6949	-0.23191	0.35857	0.553723	no
XLOC_000858	Chpf	chr1:75471068-75476046	3.45887	2.04294	-0.759652	0.0301984	0.103222	no
XLOC_000859	Obsl1	chr1:75482399-75503027	6.55699	8.65764	0.40094	0.119215	0.271196	no
XLOC_000860	Epha4	chr1:77363759-77511663	23.7498	23.0695	-0.0419276	0.790406	0.886549	no
XLOC_000861	Pax3	chr1:78097841-78193711	4.09794	0.37573	-3.44713	1.44329e-14	8.27126e-13	yes
XLOC_000862	Farsb	chr1:78306920-78485468	58.3472	36.1216	-0.691801	3.93387e-05	0.000419722	yes
XLOC_000864	Ap1s3	chr1:79603072-79668547	2.20442	1.58171	-0.47891	0.10482	0.249533	no
XLOC_000865	Wdfy1	chr1:79698836-79758344	6.70097	4.49038	-0.577534	0.0451184	0.138555	no
XLOC_000866	Serpine2	chr1:79790895-79855240	6.313	4.29457	-0.555812	0.0232393	0.0848854	no
XLOC_000868	Cul3	chr1:80262950-80337005	96.8999	119.736	0.305288	0.0803495	0.209615	no
XLOC_000870	Irs1	chr1:82229679-82288014	2.9734	6.94196	1.22323	1.94971e-11	7.16302e-10	yes
XLOC_000876	Dner	chr1:84366413-84692796	0.224473	1.94195	3.1129	1.58428e-07	3.08806e-06	yes
XLOC_000877	Trip12	chr1:84717763-84897061	45.4258	49.197	0.115057	0.575127	0.738083	no
XLOC_000885	Ncl	chr1:88241293-88256030	269.352	145.579	-0.887696	0.000221594	0.00185788	yes
XLOC_000886	Snora75	chr1:88241293-88256030	28.8607	0	-1.79769e+308	0.488268	0.668043	no
XLOC_000887	Snord82	chr1:88241293-88256030	0	1181.58	1.79769e+308	0.47904	0.660666	no
XLOC_000889	Pde6d	chr1:88439588-88479104	13.2067	18.256	0.467095	0.0603763	0.17154	no
XLOC_000896	Usp40	chr1:89749861-89905126	7.13172	7.95989	0.1585	0.477444	0.659491	no
XLOC_000897	Dnajb3	chr1:89951985-90116577	1.08288	1.16716	0.108129	0.873877	0.936713	no
XLOC_000898	A730008H23Rik,Hjurp	chr1:90123594-90174154	25.873	25.1827	-0.0390136	0.850573	0.923315	no
XLOC_000900	Arl4c	chr1:90594800-90598766	17.7857	20.4324	0.200139	0.224999	0.409319	no
XLOC_000908	Ilkap	chr1:93272407-93295360	30.3708	24.9739	-0.282267	0.129097	0.285373	no
XLOC_000910	Hes6	chr1:93308059-93309799	3.43007	13.3193	1.95721	8.76708e-08	1.77938e-06	yes
XLOC_000912	Hdac4	chr1:93825355-94045074	4.17105	4.29378	0.0418382	0.845179	0.920278	no
XLOC_000913	Ndufa10	chr1:94336061-94370335	52.525	77.8538	0.567761	0.00665026	0.0318152	yes
XLOC_000917	Myeov2	chr1:94533721-94538562	48.152	34.2637	-0.490917	0.0537663	0.158183	no
XLOC_000921	Kif1a	chr1:94912032-94998442	6.71327	15.2846	1.18699	9.62896e-12	3.64966e-10	yes
XLOC_000923	Mterfd2	chr1:95195730-95202452	2.23573	1.96898	-0.183293	0.543117	0.712678	no
XLOC_000924	Pask	chr1:95205969-95239365	6.47059	6.21051	-0.0591855	0.773398	0.876161	no
XLOC_000925	Hdlbp	chr1:95302414-95375385	62.0432	50.8026	-0.28837	0.0886279	0.223921	no
XLOC_000926	Stk25	chr1:95408680-95532304	8.53895	10.4494	0.291284	0.289639	0.482962	no
XLOC_000927	Thap4	chr1:95601967-95651415	7.5039	5.67274	-0.403596	0.0999698	0.241995	no
XLOC_000928	Dtymk	chr1:95689152-95698650	58.1038	42.9995	-0.434313	0.0934198	0.232257	no
XLOC_000930	St8sia4	chr1:97484258-97564171	1.72641	2.80844	0.701995	0.107676	0.253915	no
XLOC_000937	D1Ertd622e	chr1:99540478-99558595	3.23118	4.86577	0.590604	0.0290752	0.100456	no
XLOC_000938	Ppip5k2	chr1:99602622-99666669	22.03	18.1146	-0.282315	0.114321	0.26415	no
XLOC_000939	Pam	chr1:99717665-99992209	8.42713	4.91016	0	1	1	no
XLOC_000941	Rnf152	chr1:107173347-107253287	1.80005	1.40596	-0.356478	0.127098	0.283031	no
XLOC_000942	Pign	chr1:107414998-107560253	6.57949	4.38744	-0.584595	0.000931666	0.00634176	yes
XLOC_000944	Bcl2	chr1:108434755-108610867	1.53102	2.97556	0.958672	0.00157916	0.00978208	yes
XLOC_000945	Kdsr	chr1:108616986-108656319	2.07949	1.26681	-0.715027	0.00579014	0.0284435	yes
XLOC_000946	Vps4b	chr1:108667364-108693302	15.0897	11.9957	-0.331047	0.0528685	0.156196	no
XLOC_000952	Dsel	chr1:113751490-113761495	1.77169	1.98192	0.16177	0.503351	0.680451	no
XLOC_000953	Tsn	chr1:120195094-120207709	37.9145	39.2695	0.0506606	0.748919	0.860809	no
XLOC_000955	Gli2	chr1:120730593-120950704	9.12797	8.3605	-0.126705	0.492125	0.670724	no
XLOC_000957	Ralb	chr1:121366881-121401359	3.36291	5.06728	0.591499	0.0290537	0.1004	no
XLOC_000958	Epb4.1l5	chr1:121441609-121545577	16.5667	16.8128	0.0212739	0.896487	0.949749	no
XLOC_000959	Ptpn4	chr1:121548833-121733957	8.01281	9.94038	0.310993	0.119922	0.272196	no
XLOC_000960	Tmem177	chr1:121804477-121809745	2.10843	2.01415	-0.065992	0.819514	0.904058	no
XLOC_000962	Tmem37	chr1:121963953-121970357	2.20274	0.222551	-3.3071	6.646e-05	0.000660494	yes
XLOC_000963	Dbi	chr1:122009856-122017673	164.069	188.278	0.198563	0.230403	0.416208	no
XLOC_000966	Insig2	chr1:123200929-123230451	7.02758	6.88368	-0.0298491	0.892431	0.947685	no
XLOC_000968	Ddx18	chr1:123450411-123464557	67.2405	33.6668	-0.998004	5.26867e-10	1.57329e-08	yes
XLOC_000970	Actr3	chr1:127289481-127332304	101.851	92.4792	0	1	1	no
XLOC_000972	Nckap5	chr1:127810102-128727209	0.280437	1.40405	2.32384	2.04995e-07	3.91208e-06	yes
XLOC_000973	Tmem163	chr1:129386918-129574598	0.393842	3.7341	3.24507	1.3294e-08	3.15317e-07	yes
XLOC_000974	2900009J06Rik	chr1:129625989-129670631	1.44799	1.17153	-0.30565	0.766951	0.872104	no
XLOC_000976	Zranb3	chr1:129850762-129999634	9.95535	10.1746	0.0314356	0.902509	0.952981	no
XLOC_000978	Mcm6	chr1:130228167-130256233	87.7474	72.9998	-0.265464	0.0944856	0.233698	no
XLOC_000979	Dars	chr1:130260283-130313993	59.1837	40.4945	-0.547475	0.000574739	0.00419568	yes
XLOC_000980	Cxcr4	chr1:130484775-130488876	8.15017	3.205	-1.3465	7.43131e-08	1.52621e-06	yes
XLOC_000986	Pfkfb2	chr1:132585619-132625830	1.62312	2.03577	0.326801	0.320773	0.514791	no
XLOC_000990	Mapkapk2	chr1:132950280-132994120	20.0772	23.7208	0.240598	0.167719	0.337941	no
XLOC_000991	Dyrk3	chr1:133023161-133034850	7.28957	5.32866	-0.452061	0.0854528	0.218641	no
XLOC_000994	Srgap2	chr1:133181827-133423938	6.14083	7.26565	0.242659	0.152279	0.317583	no
XLOC_000995	Mfsd4	chr1:133904181-133964639	3.81984	8.0373	1.0732	9.88448e-07	1.60067e-05	yes
XLOC_000996	Cdk18	chr1:134010123-134036262	1.08607	0.360109	-1.59261	0.00115242	0.00753881	yes
XLOC_000997	Tmcc2	chr1:134252891-134287858	3.98774	3.714	-0.102599	0.751065	0.86193	no
XLOC_000999	Nfasc	chr1:134461266-134638374	1.46559	1.87962	0.358958	0.191028	0.36714	no
XLOC_001000	Mdm4	chr1:134879120-134921957	17.142	19.558	0.190222	0.339893	0.5352	no
XLOC_001002	Sox13	chr1:135278785-135320853	12.1338	5.7935	-1.06653	2.22231e-06	3.28982e-05	yes
XLOC_001003	Snrpe	chr1:135500447-135506857	229.715	120.17	-0.934768	1.86381e-08	4.28789e-07	yes
XLOC_001004	Zbed6,Zc3h11a	chr1:135516444-135557957	34.0842	27.2502	-0.322836	0.116706	0.26769	no
XLOC_001009	Btg2	chr1:135971441-135975732	1.7712	7.00305	1.98325	1.24367e-12	5.56194e-11	yes
XLOC_001012	Tmem183a	chr1:136242672-136258576	21.4248	16.5472	-0.372693	0.0351816	0.115706	no
XLOC_001014	Ppp1r12b	chr1:136662519-136852517	1.29835	1.99788	0.621784	0.0657801	0.182056	no
XLOC_001019	Rnpep	chr1:137159275-137180661	8.04681	5.01806	-0.681286	0.0065513	0.0314046	yes
XLOC_001020	Timm17a	chr1:137198111-137210314	73.9679	41.4689	-0.834869	1.80822e-06	2.75128e-05	yes
XLOC_001021	Shisa4	chr1:137267684-137271650	7.26559	11.2119	0.625882	0.0994641	0.24136	no
XLOC_001022	Ipo9	chr1:137278891-137327068	23.3869	25.5051	0.125081	0.428695	0.619575	no
XLOC_001023	Nav1	chr1:137331156-137481979	16.5169	9.26708	0	1	1	no
XLOC_001027	5730559C18Rik	chr1:138110009-138130857	3.96491	4.39226	0.147675	0.625191	0.775001	no
XLOC_001029	Camsap2	chr1:138164699-138242692	16.4099	20.6173	0.329284	0.0436245	0.135097	no
XLOC_001033	Nek7	chr1:140380716-140516318	2.69742	9.94783	1.8828	5.04041e-14	2.71771e-12	yes
XLOC_001035	Lhx9	chr1:140721762-140744423	0.215405	5.34189	4.63223	0.000105131	0.000984975	yes
XLOC_001036	2310009B15Rik	chr1:140748555-140753431	9.28255	10.1798	0.133118	0.767568	0.872447	no
XLOC_001043	Cdc73	chr1:145445546-145549915	29.7782	28.7092	-0.0527454	0.780017	0.879858	no
XLOC_001044	Trove2	chr1:145597920-145624181	10.4877	15.1892	0.534346	0.000775639	0.0054343	yes
XLOC_001045	Rgs2	chr1:145846467-145851279	3.85344	4.045	0.0699951	0.777461	0.878727	no
XLOC_001049	Pla2g4a	chr1:151676751-151808414	2.56307	3.714	0.5351	0.165183	0.334856	no
XLOC_001052	BC003331	chr1:152208440-152313295	7.11906	6.30447	-0.175311	0.885038	0.943394	no
XLOC_001053	Prg4	chr1:152208440-152313295	2.22923	2.07241	-0.105236	0.97283	0.987993	no
XLOC_001055	1200016B10Rik	chr1:153214828-153275598	6.85507	7.1483	0.0604277	0.76232	0.870359	no
XLOC_001056	Rnf2	chr1:153316535-153347953	29.3936	25.5071	-0.204606	0.211814	0.393182	no
XLOC_001057	1700025G04Rik	chr1:153731653-153937450	4.31251	4.25594	-0.0190503	0.913247	0.958937	no
XLOC_001058	Tsen15	chr1:154217865-154233812	24.1605	12.9779	-0.896592	2.06337e-05	0.000238959	yes
XLOC_001059	Rgl1	chr1:154363209-154472294	6.62758	5.83757	-0.183114	0.404756	0.598258	no
XLOC_001060	Smg7	chr1:154655019-154749776	23.8129	18.9977	0	1	1	no
XLOC_001062	Lamc1	chr1:155066051-155179916	14.2698	8.90279	-0.680639	2.89699e-05	0.00032183	yes
XLOC_001063	E330020D12Rik	chr1:155251315-155261363	2.44675	2.89478	0.242588	0.388941	0.583122	no
XLOC_001064	Dhx9	chr1:155302887-155334792	106.627	131.839	0.306198	0.0956775	0.235182	no
XLOC_001065	Npl	chr1:155350145-155396844	1.95265	5.52075	1.49943	0.00241739	0.0139708	yes
XLOC_001071	Ier5	chr1:156942077-156946766	2.34027	8.32572	1.8309	7.26796e-12	2.8354e-10	yes
XLOC_001074	Xpr1	chr1:157122786-157264574	7.31147	21.2675	1.54042	0	0	yes
XLOC_001076	Qsox1	chr1:157625284-157660029	0.849633	1.08998	0.359385	0.528824	0.701714	no
XLOC_001077	Cep350	chr1:157691959-157820544	3.87395	5.85297	0.595364	0.000573083	0.00418519	yes
XLOC_001078	Tor1aip1	chr1:157851728-157915989	6.1737	9.2055	0.57636	0.0745659	0.198039	no
XLOC_001082	Soat1	chr1:158354329-158404459	27.1512	7.10877	-1.93334	0	0	yes
XLOC_001083	Tor3a	chr1:158581739-158604470	2.62081	0.639756	-2.03442	4.56397e-08	9.82666e-07	yes
XLOC_001084	Fam20b	chr1:158608671-158649041	6.3252	5.27115	-0.262993	0.175886	0.348297	no
XLOC_001085	Ralgps2	chr1:158734291-158869757	21.8985	21.3007	-0.0399328	0.870474	0.935092	no
XLOC_001087	Rasal2	chr1:159064317-159350367	6.04953	9.01285	0.575161	0.000507787	0.00377458	yes
XLOC_001092	Cacybp	chr1:162132497-162143023	83.2951	41.9507	-0.989538	6.24355e-10	1.83294e-08	yes
XLOC_001093	Rabgap1l	chr1:162149019-162723069	1.33063	2.60381	0.968511	0.0016086	0.00992593	yes
XLOC_001095	Zbtb37	chr1:162933695-162964932	2.16397	2.44256	0.174715	0.340487	0.535735	no
XLOC_001096	Dars2	chr1:162965260-163000770	9.41199	8.9182	-0.0777467	0.839116	0.916231	no
XLOC_001097	Klhl20	chr1:163017454-163061610	5.29821	6.38901	0.270088	0.184358	0.358618	no
XLOC_001099	Prdx6	chr1:163170242-163181297	63.6621	33.2091	-0.938858	5.05782e-09	1.28397e-07	yes
XLOC_001101	AI848100	chr1:163746242-163806823	10.8622	10.8211	-0.00547442	0.975473	0.989119	no
XLOC_001104	Mettl13	chr1:164462253-164478567	7.12395	4.15131	-0.779111	0.0029696	0.0165717	yes
XLOC_001106	Prrc2c	chr1:164601915-164670687	92.0024	80.8904	0	1	1	no
XLOC_001113	Prrx1	chr1:165175249-165243781	1.07218	4.98557	2.21721	4.72955e-14	2.5573e-12	yes
XLOC_001114	Gorab	chr1:165315039-165333801	3.35292	5.05275	0.591653	0.0319707	0.107814	no
XLOC_001116	BC055324	chr1:165860194-165924912	20.5593	14.3146	-0.522302	0.00443593	0.0229419	yes
XLOC_001118	Blzf1	chr1:166219930-166237615	3.05879	3.37252	0.140863	0.537733	0.70877	no
XLOC_001119	Atp1b1	chr1:166237721-166388486	3.65649	5.32866	0.543314	0.108093	0.254552	no
XLOC_001123	Sft2d2	chr1:167104409-167124564	5.77414	3.1796	-0.860762	1.88948e-05	0.000220393	yes
XLOC_001124	Tiprl	chr1:167142416-167167089	11.4913	7.81244	-0.55669	0.00114286	0.00749157	yes
XLOC_001125	Dcaf6	chr1:167259631-167390598	2.43155	4.22732	0.79787	0.0295849	0.101868	no
XLOC_001126	Mpzl1	chr1:167522311-167564672	20.3886	16.5746	-0.298788	0.127812	0.283877	no
XLOC_001128	Pou2f1	chr1:167718811-167932765	16.264	5.7522	-1.4995	0	0	yes
XLOC_001132	Pogk	chr1:168309297-168339959	2.54248	17.5122	2.78405	0	0	yes
XLOC_001137	Uck2	chr1:169153017-169215296	69.6643	52.5056	-0.407947	0.0539582	0.158577	no
XLOC_001138	Mgst3	chr1:169302514-169323928	3.39425	4.69225	0.467185	0.367259	0.562196	no
XLOC_001140	Pbx1	chr1:170049494-170362389	33.3943	62.3664	0.901167	5.40592e-07	9.31365e-06	yes
XLOC_001141	Nuf2	chr1:171428064-171461595	26.8251	31.5861	0.235706	0.168895	0.3396	no
XLOC_001143	Hsd17b7	chr1:171879667-171899336	5.14108	9.2589	0.848768	4.0883e-06	5.62171e-05	yes
XLOC_001145	Uap1	chr1:172072114-172105077	8.17826	9.21864	0.172759	0.434475	0.624475	no
XLOC_001146	Uhmk1	chr1:172123287-172145539	24.8116	28.6229	0.206156	0.213874	0.395573	no
XLOC_001147	Gm7694	chr1:172228323-172236463	1.10097	1.55334	0.496594	0.147091	0.310818	no
XLOC_001149	Atf6	chr1:172634587-172798156	3.40112	2.91893	-0.220571	0.285119	0.478471	no
XLOC_001150	Dusp12	chr1:172804318-172815671	12.8874	7.07245	-0.865674	0.000850025	0.00588439	yes
XLOC_001155	Sdhc	chr1:173059287-173080734	52.6661	48.4484	-0.120424	0.486635	0.666764	no
XLOC_001156	Pcp4l1	chr1:173103394-173126399	0.931335	1.58855	0.770339	0.135201	0.294067	no
XLOC_001157	Tomm40l	chr1:173144100-173152645	3.51652	3.24431	-0.116237	0.697843	0.827238	no
XLOC_001158	Fcer1g	chr1:173159702-173164480	0.0568631	1.21956	4.42273	0.0303773	0.103664	no
XLOC_001159	Ndufs2	chr1:173164990-173177243	59.4145	64.5951	0.120611	0.459805	0.644866	no
XLOC_001160	Ppox	chr1:173200458-173211317	2.79286	3.66559	0.392302	0.341259	0.536391	no
XLOC_001161	Usp21	chr1:173212083-173218092	8.5527	12.138	0.505077	0.024071	0.0870641	no
XLOC_001162	Ufc1	chr1:173218694-173225113	28.9439	23.0307	-0.329701	0.114618	0.264617	no
XLOC_001163	Nit1	chr1:173259275-173275776	8.99657	9.6331	0.0986254	0.717127	0.840129	no
XLOC_001164	Klhdc9	chr1:173288579-173290929	2.16103	1.88634	-0.196123	0.635692	0.783275	no
XLOC_001168	Vangl2	chr1:173929557-173957399	20.071	25.4652	0.343414	0.132637	0.290447	no
XLOC_001169	Nhlh1	chr1:173982422-173987727	0	3.85095	1.79769e+308	1.04401e-18	8.05782e-17	yes
XLOC_001170	Ncstn	chr1:173996143-174052463	13.5288	12.231	-0.145492	0.719281	0.841468	no
XLOC_001171	Pea15a	chr1:174126859-174136912	25.5866	47.2849	0.885989	9.31595e-08	1.88098e-06	yes
XLOC_001185	Cadm3,Darc	chr1:175262016-175297826	2.92146	2.26669	-0.366107	0.230696	0.41658	no
XLOC_001199	Fh1	chr1:177531508-177555766	32.4852	31.2429	-0.0562544	0.745553	0.858288	no
XLOC_001200	Chml,Opn3	chr1:177592558-177622853	7.69868	8.20759	0.0923479	0.744954	0.858055	no
XLOC_001202	Cep170	chr1:178663783-178744332	12.1481	23.7985	0.970134	2.06832e-08	4.71868e-07	yes
XLOC_001204	Hmga2-ps1	chr1:178744942-178950563	2.27889	0.937633	-1.28124	0.0447259	0.137725	no
XLOC_001205	Akt3	chr1:178952245-179188349	25.8628	49.3962	0.933522	1.14691e-05	0.000142091	yes
XLOC_001207	Adss	chr1:179693308-179726640	68.2741	41.1978	-0.728771	3.79615e-06	5.28837e-05	yes
XLOC_001208	Hnrnpu	chr1:180258430-180267915	325.448	312.659	-0.057838	0.778667	0.879347	no
XLOC_001209	Smyd3	chr1:180885169-181448134	2.432	1.73236	-0.489402	0.0648301	0.180288	no
XLOC_001210	Tfb2m	chr1:181458184-181476398	11.57	10.0535	0	1	1	no
XLOC_001211	Ahctf1	chr1:181675034-181734146	30.3281	22.6702	-0.419856	0.00884329	0.040271	yes
XLOC_001215	6330403A02Rik	chr1:182361868-182413635	0.211138	1.63866	2.95626	5.93426e-08	1.24837e-06	yes
XLOC_001217	H3f3a	chr1:182732698-182743734	611.109	410.146	-0.575291	0.000818894	0.00569566	yes
XLOC_001219	Nvl	chr1:183020916-183074312	21.0424	15.598	-0.431942	0.0219229	0.0810558	no
XLOC_001220	Wdr26	chr1:183102046-183142109	25.5587	32.1604	0.331471	0.0395402	0.126287	no
XLOC_001222	Lbr	chr1:183745445-183772532	29.9773	25.9081	-0.210467	0.185172	0.359653	no
XLOC_001223	Enah	chr1:183826471-183950111	26.884	32.3184	0.265605	0.152576	0.318028	no
XLOC_001225	Degs1	chr1:184205900-184212890	20.6474	11.0317	-0.904302	1.90021e-06	2.87525e-05	yes
XLOC_001226	Fbxo28	chr1:184243232-184271737	12.8305	10.891	-0.236432	0.152987	0.318573	no
XLOC_001227	Capn2	chr1:184397389-184447614	8.11287	17.3619	1.09764	6.37304e-09	1.59044e-07	yes
XLOC_001233	Mosc2	chr1:186636946-186669726	3.23392	3.6899	0.190301	0.525578	0.699103	no
XLOC_001236	Mark1	chr1:186720302-186823428	3.83656	5.65687	0.560189	0.0169947	0.0664548	no
XLOC_001237	Iars2	chr1:187028039-187153280	11.0425	12.9314	0.227813	0.301856	0.496035	no
XLOC_001240	Lyplal1	chr1:187911547-187941189	11.3837	6.41518	-0.827409	0.000447895	0.00339262	yes
XLOC_001242	Rrp15	chr1:188544964-188573237	27.7145	13.1318	-1.07757	1.26839e-07	2.5211e-06	yes
XLOC_001245	Kctd3	chr1:190794976-190831719	7.13064	7.62598	0.0968899	0.652692	0.796556	no
XLOC_001246	Kcnk2	chr1:191031808-191168071	0.548361	1.1415	1.05774	0.0449958	0.138289	no
XLOC_001247	Cenpf	chr1:191464492-191511970	29.7561	38.5803	0.374679	0.0320211	0.107946	no
XLOC_001248	Smyd2	chr1:191704370-191746167	9.18884	7.66888	-0.260866	0.287104	0.480414	no
XLOC_001249	Prox1	chr1:191942208-191994559	2.8228	3.63651	0.365427	0.150458	0.315399	no
XLOC_001250	Rps6kc1	chr1:192596602-192735649	2.87352	3.1174	0.117522	0.685539	0.819214	no
XLOC_001251	Vash2	chr1:192748986-192803175	10.8193	8.55859	-0.338162	0.19941	0.377426	no
XLOC_001252	Mfsd7b	chr1:192829710-192853660	5.74873	4.39105	-0.388679	0.055134	0.160995	no
XLOC_001253	Tatdn3	chr1:192869708-192886811	2.07423	3.39902	0.712546	0.194605	0.371491	no
XLOC_001256	Nenf	chr1:193130675-193141997	11.5343	5.50684	-1.06663	0.00365389	0.0195963	yes
XLOC_001257	Ppp2r5a	chr1:193149843-193220920	12.8604	6.9722	-0.883253	0.000116482	0.00107866	yes
XLOC_001258	Dtl	chr1:193361243-193399413	27.5572	30.0585	0.125347	0.428131	0.619227	no
XLOC_001262	Rcor3	chr1:193922474-193974907	1.09128	2.96715	1.44305	6.17467e-05	0.000620742	yes
XLOC_001263	Hhat	chr1:194336702-194597413	2.56436	1.2938	-0.986984	0.025351	0.0906998	no
XLOC_001264	Sertad4	chr1:194670681-194681946	7.34422	2.31536	-1.66537	1.35025e-12	5.96887e-11	yes
XLOC_001265	Syt14	chr1:194715239-194861945	5.58098	4.18801	-0.414254	0.0371493	0.120562	no
XLOC_001266	Diexf	chr1:194930596-194956445	5.88699	4.19486	-0.488908	0.0155758	0.0621504	no
XLOC_001269	G0s2	chr1:195098353-195099382	1.26203	0.601197	-1.06983	0.221589	0.404828	no
XLOC_001270	Camk1g	chr1:195172539-195196476	4.00224	2.40227	-0.736411	0.061346	0.173368	no
XLOC_001275	Cr1l	chr1:196922366-196957955	10.4429	11.1244	0.091208	0.707995	0.834553	no
XLOC_001277	-	chr1:3189898-3197031	0.329899	1.07059	1.69831	1.17633e-05	0.000145359	yes
XLOC_001289	-	chr1:7373751-7374195	1.04147	0.401828	-1.37397	0.255077	0.445005	no
XLOC_001297	-	chr1:9532884-9535257	2.68807	0.849849	-1.66129	1.91853e-06	2.89819e-05	yes
XLOC_001318	-	chr1:17113141-17113455	1.15237	0.470854	-1.29125	0.404695	0.598213	no
XLOC_001326	-	chr1:23268440-23279057	0.746157	1.30179	0.802948	0.00179891	0.0108965	yes
XLOC_001329	-	chr1:30859186-30930680	0.949366	1.05161	0.147563	0.97117	0.987541	no
XLOC_001330	-	chr1:30859186-30930680	2.17343	1.81095	-0.263224	0.82037	0.904638	no
XLOC_001331	-	chr1:30859186-30930680	0.808064	1.57837	0.965896	0.450612	0.637815	no
XLOC_001332	-	chr1:30859186-30930680	0.686402	2.16328	1.6561	0.771829	0.875316	no
XLOC_001333	-	chr1:30859186-30930680	1.53479	3.06214	0.996493	0.32066	0.514783	no
XLOC_001348	-	chr1:34852121-34858444	0.440463	1.56885	1.83261	3.32495e-07	6.06701e-06	yes
XLOC_001372	-	chr1:43245896-43246118	24.7063	12.0678	-1.03371	0.0795465	0.207807	no
XLOC_001388	-	chr1:55185508-55185916	1.85383	0.894936	-1.05066	0.270168	0.463128	no
XLOC_001397	-	chr1:59934678-59935619	0.707788	1.17325	0.729117	0.317517	0.511884	no
XLOC_001402	-	chr1:60126727-60131511	1.61631	2.10076	0.378212	0.157363	0.324298	no
XLOC_001403	-	chr1:60762081-60762567	2.75375	0.466376	-2.56183	0.0050687	0.0256192	yes
XLOC_001405	-	chr1:63299057-63299662	0.688514	1.33638	0.956771	0.293178	0.486352	no
XLOC_001408	-	chr1:64578073-64579022	1.07087	0.523991	-1.03116	0.152137	0.31739	no
XLOC_001411	-	chr1:65040449-65040540	1326.83	527.184	-1.3316	0.235971	0.423034	no
XLOC_001414	-	chr1:68078680-68080050	0.347704	1.1124	1.67775	0.0320937	0.108095	no
XLOC_001426	-	chr1:78211538-78213525	1.41335	0.11227	-3.65408	3.21053e-07	5.87503e-06	yes
XLOC_001433	-	chr1:81995364-81996110	0.563381	1.46071	1.37449	0.112023	0.260791	no
XLOC_001466	-	chr1:95268582-95270069	5.44924	6.8601	0.332174	0.222008	0.405289	no
XLOC_001474	-	chr1:107662711-107662944	4.80369	2.6547	-0.855592	0.420747	0.61304	no
XLOC_001485	-	chr1:120283874-120285448	2.20916	1.49964	-0.558884	0.156572	0.32326	no
XLOC_001505	-	chr1:134370708-134372692	1.262	0.73911	-0.771852	0.0913397	0.22857	no
XLOC_001507	-	chr1:135077875-135078207	0.597503	1.79777	1.58919	0.231669	0.417589	no
XLOC_001524	-	chr1:139795071-139831817	0.388765	3.13118	3.00974	2.07168e-13	1.03535e-11	yes
XLOC_001525	-	chr1:139795071-139831817	0.371722	2.28802	2.6218	0.0251815	0.0902451	no
XLOC_001526	-	chr1:139795071-139831817	0.295325	2.04577	2.79227	1.86539e-06	2.82479e-05	yes
XLOC_001527	-	chr1:139795071-139831817	0.329603	1.71421	2.37874	0.000649553	0.00464963	yes
XLOC_001528	-	chr1:139795071-139831817	0.314503	1.2769	2.02149	0.0229927	0.0842787	no
XLOC_001529	-	chr1:139795071-139831817	0	1.58269	1.79769e+308	0.134834	0.293646	no
XLOC_001530	-	chr1:139795071-139831817	0.505816	1.82253	1.84926	0.0525842	0.155615	no
XLOC_001531	-	chr1:139795071-139831817	0.261914	1.16812	2.15703	0.0553	0.161209	no
XLOC_001532	-	chr1:139795071-139831817	0.155852	1.36963	3.13553	0.0760132	0.201018	no
XLOC_001533	-	chr1:139795071-139831817	1.03995	0.907889	-0.195924	0.926289	0.965849	no
XLOC_001534	-	chr1:139795071-139831817	0	1.23989	1.79769e+308	0.206123	0.385631	no
XLOC_001535	-	chr1:139831936-139858016	0.307986	1.24507	2.01529	2.22045e-16	1.5978e-14	yes
XLOC_001536	-	chr1:139858086-139862033	0.231804	1.04696	2.17523	0.000128335	0.00116863	yes
XLOC_001550	-	chr1:154521988-154522132	16.7116	27.3969	0.713164	0.60693	0.762644	no
XLOC_001560	-	chr1:158296566-158296655	1556.54	759.15	-1.03589	0.315844	0.510003	no
XLOC_001564	-	chr1:159061156-159062174	0.366941	1.04703	1.51268	0.0819027	0.212483	no
XLOC_001565	-	chr1:161284427-161285319	0.713971	1.10385	0.628607	0.403704	0.597277	no
XLOC_001582	-	chr1:167167269-167167731	0.402594	1.35776	1.75383	0.166897	0.337051	no
XLOC_001588	-	chr1:167968619-167968952	1.27562	0	-1.79769e+308	0.0771795	0.203263	no
XLOC_001597	-	chr1:173004427-173004826	14.1946	5.34984	-1.40777	0.00109288	0.00723582	yes
XLOC_001601	-	chr1:173257118-173259227	0.629181	1.02329	0.701668	0.181158	0.354845	no
XLOC_001603	-	chr1:173433129-173433394	1.29215	6.50929	2.33273	0.0503171	0.150629	no
XLOC_001619	-	chr1:178663783-178744332	1.5553	2.30637	0.56843	0.698081	0.827316	no
XLOC_001620	-	chr1:178663783-178744332	1.26901	2.52422	0.992139	0.609327	0.764296	no
XLOC_001622	-	chr1:178952245-179188349	0.580766	1.57505	1.43937	0.274354	0.467624	no
XLOC_001623	-	chr1:178952245-179188349	0.787922	1.9632	1.31708	0.344488	0.539551	no
XLOC_001626	-	chr1:179915083-179916961	1.22882	3.37255	1.45656	0.00031644	0.00253748	yes
XLOC_001630	-	chr1:180268048-180269218	1.22745	1.41903	0.209246	0.698645	0.827625	no
XLOC_001643	-	chr1:183017118-183020522	3.35172	3.07868	-0.122587	0.617534	0.769576	no
XLOC_001646	-	chr1:183959412-183959843	0.475538	1.21533	1.35372	0.274667	0.467906	no
XLOC_001654	-	chr1:188575984-188576465	1.30852	0.413409	-1.66229	0.121904	0.275225	no
XLOC_001667	-	chr1:194711016-194715148	1.59732	1.28398	-0.315033	0.287301	0.480552	no
XLOC_001668	-	chr1:195410216-195410672	1.1513	0.279149	-2.04415	0.110494	0.258615	no
XLOC_001672	Cnksr3	chr10:3134303-3228837	6.7013	3.8574	-0.796812	0.000484516	0.00363413	yes
XLOC_001675	Mtrf1l	chr10:4522597-4535040	5.3948	5.51904	0.0328477	0.893175	0.947897	no
XLOC_001676	Fbxo5	chr10:4541075-4547387	30.2333	21.4043	-0.498241	0.00474714	0.0242178	yes
XLOC_001679	Rmnd1	chr10:5914149-5958178	5.68371	2.61591	-1.11952	0.000645305	0.00462441	yes
XLOC_001680	Zbtb2	chr10:5958432-5979467	7.8844	6.3485	-0.312585	0.116222	0.266834	no
XLOC_001683	Lrp11	chr10:7309597-7346219	4.56361	3.52301	-0.373369	0.115051	0.265197	no
XLOC_001684	A630066F11Rik	chr10:7349152-7384421	1.25665	0.678154	-0.889903	0.468319	0.650704	no
XLOC_001685	Nup43	chr10:7387301-7398684	48.5896	27.9552	-0.79753	4.18903e-06	5.75195e-05	yes
XLOC_001686	Lats1	chr10:7401006-7436259	10.2333	13.864	0.438071	0.0115871	0.0495616	yes
XLOC_001687	Katna1	chr10:7445797-7482948	19.7401	15.1509	-0.381724	0.0391838	0.125403	no
XLOC_001688	Ppil4	chr10:7512691-7543149	16.9015	19.0621	0.173555	0.323171	0.517295	no
XLOC_001694	Shprh	chr10:10869227-10937388	7.31486	8.645	0.241036	0.183224	0.357173	no
XLOC_001695	Fbxo30	chr10:11001127-11020900	16.4591	14.762	-0.157003	0.369205	0.563957	no
XLOC_001697	Sf3b5	chr10:12728255-12728989	64.787	40.6138	-0.673733	0.00081193	0.00565339	yes
XLOC_001698	Plagl1	chr10:12810593-12851501	2.80815	30.215	3.42758	0	0	yes
XLOC_001699	Fuca2	chr10:13220833-13237766	2.57087	2.74809	0.0961754	0.731604	0.849519	no
XLOC_001700	Adat2	chr10:13243647-13284471	8.02666	3.70076	-1.11698	0.00184017	0.0110902	yes
XLOC_001704	Cited2	chr10:17443033-17445480	29.3082	16.2739	-0.84875	1.74757e-06	2.66961e-05	yes
XLOC_001706	Reps1	chr10:17775703-17844961	26.4254	21.9739	-0.266136	0.131605	0.289048	no
XLOC_001707	Nhsl1	chr10:18127480-18253729	6.03955	8.13806	0.430245	0.0200223	0.0754868	no
XLOC_001711	Ifngr1	chr10:19311763-19330031	1.98737	3.44628	0.794179	0.0162413	0.0640714	no
XLOC_001715	Mtap7	chr10:19868725-20001396	2.5855	0.893959	-1.53216	1.7132e-07	3.30901e-06	yes
XLOC_001717	Bclaf1	chr10:20030509-20062307	140.295	163.107	0.217353	0.346607	0.541568	no
XLOC_001718	Fam54a	chr10:20067624-20081475	3.48483	2.41548	-0.528775	0.047521	0.144129	no
XLOC_001719	Ahi1	chr10:20672352-20800235	8.89138	9.87808	0.151824	0.401543	0.595255	no
XLOC_001720	Hbs1l	chr10:21015784-21088695	32.2259	26.766	-0.267819	0.136858	0.296604	no
XLOC_001724	Sgk1	chr10:21601989-21719708	2.41628	0.859095	-1.4919	0.000335623	0.00266011	yes
XLOC_001725	Raet1a,Raet1b,Raet1c,Raet1d,Raet1e	chr10:21878401-22094180	5.18267	5.07885	-0.0291949	0.935497	0.971011	no
XLOC_001730	1110021L09Rik	chr10:23516791-23547774	2.1977	3.60119	0.712482	0.0191114	0.072697	no
XLOC_001743	Stx7	chr10:23869122-23909059	6.14656	7.39884	0.267521	0.243953	0.432281	no
XLOC_001745	Ctgf	chr10:24315013-24319271	2.70846	2.12268	-0.351587	0.287181	0.480472	no
XLOC_001746	Med23	chr10:24589791-24633335	7.60088	6.85873	-0.148227	0.451351	0.638376	no
XLOC_001747	Epb4.1l2	chr10:25079603-25243367	8.49247	8.04654	-0.0778164	0.707142	0.833937	no
XLOC_001749	Samd3	chr10:25949448-25992708	0.0215841	1.77192	6.35919	1.57684e-05	0.000187934	yes
XLOC_001750	Arhgap18	chr10:26492317-26638454	1.57206	3.96965	1.33636	4.29026e-07	7.58263e-06	yes
XLOC_001751	Ptprk	chr10:27794622-28317285	10.8933	8.87187	-0.29613	0.0986389	0.239813	no
XLOC_001753	6330407J23Rik,9330159F19Rik	chr10:28863249-28950585	6.00119	10.6674	0.829891	0.000382221	0.00298373	yes
XLOC_001755	Hddc2	chr10:31033210-31047892	12.4982	14.7886	0.242769	0.380735	0.574646	no
XLOC_001760	Tspyl1	chr10:34001995-34004691	13.0723	9.4964	-0.461063	0.0128143	0.0533677	no
XLOC_001761	Tspyl4	chr10:34017226-34021126	4.31158	4.65342	0.110073	0.610454	0.765083	no
XLOC_001765	Hdac2	chr10:36694349-36721697	127.899	139.75	0.127839	0.449871	0.637096	no
XLOC_001767	Tube1	chr10:38853828-38883600	4.81073	3.7332	-0.36584	0.109312	0.256761	no
XLOC_001768	Fyn	chr10:39089604-39285180	6.32558	9.79901	0.631438	0.00279205	0.0157669	yes
XLOC_001770	Rev3l	chr10:39451965-39595040	8.54615	8.56495	0.00317135	0.985087	0.992936	no
XLOC_001771	Cdk19	chr10:40069113-40203624	1.60185	3.58518	1.16231	5.34422e-07	9.23229e-06	yes
XLOC_001775	Wasf1	chr10:40603339-40658375	22.7435	17.2651	-0.397598	0.0339064	0.112596	no
XLOC_001776	Zbtb24	chr10:41170201-41185474	3.76487	4.52523	0.26539	0.432021	0.622596	no
XLOC_001777	Mical1	chr10:41196119-41206836	2.92636	2.53184	-0.208923	0.471654	0.654056	no
XLOC_001779	Cd164	chr10:41239305-41250848	73.1179	44.0604	-0.730744	3.97462e-06	5.49301e-05	yes
XLOC_001781	Sesn1	chr10:41530379-41628242	3.57649	4.71894	0.399915	0.135348	0.294297	no
XLOC_001782	Snx3	chr10:42221859-42255175	39.7337	38.6493	-0.0399235	0.818595	0.903474	no
XLOC_001783	Ostm1	chr10:42303600-42422268	4.04661	6.29226	0.636864	0.0148048	0.0597215	no
XLOC_001784	Sec63	chr10:42481301-42552320	17.1269	18.3211	0.0972444	0.541716	0.711734	no
XLOC_001787	Pdss2	chr10:42941291-43184688	3.57965	3.43316	-0.060281	0.852402	0.924388	no
XLOC_001788	Bend3	chr10:43198945-43235223	22.4143	15.5522	-0.527302	0.000943608	0.00639575	yes
XLOC_001789	Cd24a	chr10:43298974-43304071	152.419	143.909	-0.0828867	0.611785	0.766122	no
XLOC_001792	Rtn4ip1	chr10:43621612-43667708	3.9582	3.44555	-0.200108	0.437397	0.626435	no
XLOC_001794	Atg5	chr10:43988163-44084183	11.23	8.89666	-0.336027	0.0936183	0.232591	no
XLOC_001796	Prep	chr10:44787019-44878801	36.2641	30.6226	-0.243946	0.136154	0.295378	no
XLOC_001798	Bves	chr10:45055567-45094285	1.5887	0.709397	-1.16318	0.0459088	0.140351	no
XLOC_001799	Hace1	chr10:45297634-45432151	6.28786	5.29948	-0.246717	0.201204	0.379396	no
XLOC_001801	Ascc3	chr10:50312474-50571008	10.7549	9.52578	0	1	1	no
XLOC_001807	Dcbld1	chr10:51953424-52042063	3.23963	4.33319	0.419601	0.134275	0.292828	no
XLOC_001809	Nus1	chr10:52137352-52159998	21.1305	15.3126	-0.464607	0.00343206	0.0186258	yes
XLOC_001810	Slc35f1	chr10:52410306-52831428	5.10743	15.6291	1.61357	0	0	yes
XLOC_001813	Asf1a	chr10:53255636-53351259	28.0115	27.4604	-0.0286686	0.877449	0.938945	no
XLOC_001815	Msl3l2	chr10:55734099-55948495	3.22613	2.0839	-0.630518	0.134902	0.293758	no
XLOC_001816	Gja1	chr10:56097105-56110225	112.015	23.0779	-2.2791	0	0	yes
XLOC_001817	Hsf2	chr10:57206189-57232949	17.3272	18.0892	0.062095	0.762114	0.870176	no
XLOC_001819	Fabp7	chr10:57504728-57508256	4.48865	190.471	5.40715	0	0	yes
XLOC_001820	Smpdl3a	chr10:57514349-57531636	0.100443	2.10322	4.38815	1.7269e-05	0.000204167	yes
XLOC_001821	Gcc2	chr10:57718273-57768340	7.61708	15.4423	1.01958	4.2479e-10	1.28857e-08	yes
XLOC_001822	Lims1	chr10:57786213-57887439	16.9616	14.8447	-0.192324	0.237157	0.424444	no
XLOC_001823	Ranbp2	chr10:57909553-57958208	27.2889	29.7473	0.124446	0.453304	0.639733	no
XLOC_001824	Ccdc138	chr10:57960678-58038992	5.74885	6.13681	0.0942144	0.73336	0.850794	no
XLOC_001827	Sowahc	chr10:58684659-58689950	3.26014	4.31698	0.405089	0.0554276	0.161483	no
XLOC_001828	P4ha1	chr10:58786043-58837833	7.53075	4.41785	-0.769448	0.000186149	0.00159351	yes
XLOC_001830	Micu1	chr10:59165382-59326870	2.43459	4.97715	1.03164	0.000690154	0.0048963	yes
XLOC_001831	Dnajb12	chr10:59342320-59362045	5.9473	5.619	-0.0819217	0.777228	0.878576	no
XLOC_001832	Ascc1	chr10:59450340-59562738	6.32258	4.89	-0.370679	0.319376	0.513626	no
XLOC_001833	Spock2	chr10:59569004-59597910	0.309653	1.35398	2.12848	1.04474e-05	0.000130191	yes
XLOC_001834	Psap	chr10:59740375-59765349	10.3034	15.5713	0.595775	0.00530689	0.0265428	yes
XLOC_001838	Pcbd1	chr10:60552090-60557077	14.4171	8.55209	-0.753436	0.00779285	0.0363635	yes
XLOC_001842	Lrrc20	chr10:60938580-61044976	1.99195	3.53087	0.825847	0.0108287	0.0469791	yes
XLOC_001844	Ppa1	chr10:61111368-61136913	144.6	94.9652	-0.606597	0.00012369	0.00113334	yes
XLOC_001845	Sar1a	chr10:61143068-61156052	58.2091	44.4467	-0.389168	0.015589	0.0621773	no
XLOC_001846	Tysnd1	chr10:61158261-61165521	5.44281	5.16259	-0.0762587	0.79835	0.891293	no
XLOC_001854	Slc25a16	chr10:62383380-62409242	4.41391	5.04219	0.191993	0.369996	0.564548	no
XLOC_001855	Dna2	chr10:62409776-62436936	7.83114	7.61517	-0.0403455	0.829223	0.909475	no
XLOC_001856	Rufy2	chr10:62442970-62486659	3.0627	3.0129	-0.0236497	0.954895	0.98015	no
XLOC_001858	Pbld1	chr10:62524364-62540284	6.54481	4.15084	-0.656947	0.0112165	0.0482788	yes
XLOC_001860	Herc4	chr10:62706544-62780629	16.452	15.2096	-0.113277	0.563463	0.729068	no
XLOC_001861	Dnajc12	chr10:62845190-62871588	2.77339	1.56986	-0.821021	0.0939669	0.233163	no
XLOC_001863	Jmjd1c	chr10:66471936-66719117	13.4676	12.5268	-0.104475	0.584788	0.745549	no
XLOC_001865	Rtkn2	chr10:67442345-67510192	2.40652	2.56	0.0891928	0.734521	0.851675	no
XLOC_001866	Tmem26	chr10:68186493-68245402	0.245587	1.00991	2.03992	2.08375e-05	0.000240997	yes
XLOC_001867	Rhobtb1	chr10:68671299-68754540	2.2236	1.69869	-0.388479	0.232627	0.418843	no
XLOC_001868	Ank3	chr10:68996363-69490330	2.9608	3.87196	0.387078	0.0735813	0.196213	no
XLOC_001869	Ccdc6	chr10:69559868-69655948	25.9434	18.3985	-0.495779	0.00172321	0.0104979	yes
XLOC_001873	Ipmk	chr10:70810540-70848633	13.3671	11.2394	-0.250132	0.126414	0.281895	no
XLOC_001874	Zwint	chr10:72117616-72137730	52.7686	51.3989	-0.0379419	0.84842	0.92177	no
XLOC_001875	Pcdh15	chr10:73284614-74112543	1.18847	0.0549333	-4.43528	2.71116e-13	1.34791e-11	yes
XLOC_001876	Gnaz	chr10:74420221-74495331	1.71752	2.22919	0.376199	0.365416	0.560676	no
XLOC_001877	Rab36	chr10:74499833-74517978	1.61795	1.85153	0.194556	0.619167	0.770928	no
XLOC_001878	Bcr	chr10:74523640-74647668	5.1409	5.41758	0.0756295	0.690288	0.821553	no
XLOC_001879	Specc1l	chr10:74674817-74775145	10.8941	13.2651	0.284083	0.0864031	0.220248	no
XLOC_001884	Snrpd3	chr10:74980388-75000119	30.1405	12.8089	-1.23456	2.56182e-05	0.000288785	yes
XLOC_001888	Chchd10	chr10:75398317-75400479	1.23535	1.27054	0.0405235	0.954905	0.98015	no
XLOC_001891	Zfp280b	chr10:75495356-75505859	14.1712	8.98956	-0.656641	0.000202772	0.001725	yes
XLOC_001896	Mcm3ap	chr10:75911825-75978602	7.29818	6.2689	-0.219326	0.25247	0.441569	no
XLOC_001897	Lss	chr10:75994371-76024971	7.69874	13.2083	0.778746	0.000288564	0.00234042	yes
XLOC_001901	Slc19a1	chr10:76495483-76513177	6.40571	3.75421	-0.770849	0.00644387	0.0309516	yes
XLOC_001902	Pofut2	chr10:76722044-76732331	8.67186	6.31061	-0.458561	0.0709296	0.191544	no
XLOC_001905	Pttg1ip	chr10:77044511-77061477	9.34887	10.7471	0.20108	0.328825	0.522907	no
XLOC_001906	Sumo3	chr10:77068978-77081076	24.9545	19.3392	-0.367776	0.0295267	0.101704	no
XLOC_001907	Ube2g2	chr10:77085065-77108735	17.7561	16.9115	-0.0703045	0.713536	0.837696	no
XLOC_001919	1810043G02Rik	chr10:77441394-77448573	1.89017	2.62065	0.471407	0.283158	0.476729	no
XLOC_001922	Cstb	chr10:77888414-77890367	38.0125	21.5321	-0.819982	0.000401139	0.0031023	yes
XLOC_001923	Ilvbl	chr10:78037244-78054709	2.36143	2.19525	-0.105277	0.807814	0.896959	no
XLOC_001937	Gm16517	chr10:79132154-79138871	6.84045	5.87003	-0.220723	0.518909	0.693422	no
XLOC_001938	Cdc34	chr10:79144939-79151143	42.6499	24.6655	-0.790048	3.86347e-05	0.000413594	yes
XLOC_001940	Bsg	chr10:79167102-79174724	147.142	72.2846	-1.02545	2.43744e-10	7.71159e-09	yes
XLOC_001944	Palm	chr10:79256316-79283641	8.38823	12.7644	0.605682	0.00623719	0.0301708	yes
XLOC_001946	Ptbp1	chr10:79314121-79337379	260.044	143.615	-0.856543	1.13448e-06	1.81261e-05	yes
XLOC_001951	Arid3a	chr10:79389816-79417757	7.29123	2.7357	-1.41425	1.94644e-12	8.44827e-11	yes
XLOC_001952	Wdr18	chr10:79422896-79432630	14.5408	8.84794	-0.716689	0.000500924	0.00373226	yes
XLOC_001954	Cnn2	chr10:79451344-79458145	4.61441	2.98517	-0.628333	0.0409354	0.129319	no
XLOC_001956	Hmha1	chr10:79479416-79494216	1.68807	0.575343	-1.55288	0.000191441	0.00163515	yes
XLOC_001957	Gpx4	chr10:79516254-79519184	23.6937	18.9854	-0.319611	0.157455	0.324356	no
XLOC_001958	Stk11	chr10:79579280-79602112	34.8265	36.7937	0.0792708	0.787304	0.884222	no
XLOC_001959	Atp5d	chr10:79605059-79608563	108.19	111.112	0.0384401	0.817966	0.903027	no
XLOC_001960	Midn	chr10:79610998-79621408	35.5742	44.2579	0.315103	0.0669744	0.184428	no
XLOC_001961	Cirbp	chr10:79630585-79634398	4.22899	6.86986	0.699967	0.0314874	0.106522	no
XLOC_001962	1600002K03Rik	chr10:79635688-79637889	2.34609	1.69406	-0.469769	0.519327	0.693728	no
XLOC_001963	Efna2	chr10:79642226-79652780	5.65812	8.32307	0.556792	0.051546	0.153444	no
XLOC_001964	Mum1	chr10:79689342-79707889	3.91015	3.30693	-0.241732	0.352458	0.547198	no
XLOC_001965	Ndufs7	chr10:79712136-79719540	33.7234	26.9882	-0.321422	0.182346	0.356225	no
XLOC_001966	Dazap1	chr10:79727735-79751158	16.1347	13.2202	-0.287423	0.213034	0.394627	no
XLOC_001967	Rps15	chr10:79755172-79756859	1101.48	493.758	-1.15757	8.07354e-13	3.70589e-11	yes
XLOC_001968	Apc2	chr10:79763836-79783293	1.60826	4.47182	1.47536	2.75762e-08	6.1663e-07	yes
XLOC_001969	Reep6	chr10:79792889-79799186	3.30884	3.36563	0.0245515	0.94229	0.974255	no
XLOC_001972	Adat3,Scamp4	chr10:80065624-80078528	23.3848	13.0583	-0.840603	0.000177637	0.00152953	yes
XLOC_001973	Csnk1g2	chr10:80085524-80103516	29.1763	24.3712	-0.259618	0.167714	0.337941	no
XLOC_001975	Dot1l	chr10:80217950-80258739	7.47275	7.15689	-0.0623065	0.737013	0.853221	no
XLOC_001976	Sf3a2	chr10:80258842-80267667	25.6274	19.2857	-0.410152	0.156106	0.322646	no
XLOC_001978	Oaz1	chr10:80289400-80292035	552.675	364.471	-0.600627	0.000245573	0.00203485	yes
XLOC_001980	3110056O03Rik	chr10:80318019-80331453	1.80337	1.67942	-0.102736	0.800529	0.89232	no
XLOC_001983	Thop1	chr10:80532766-80545105	37.7977	15.18	-1.31613	3.98672e-06	5.50193e-05	yes
XLOC_001984	Map2k2	chr10:80568667-80587526	16.2838	13.5585	-0.264238	0.195517	0.372463	no
XLOC_001985	Zbtb7a	chr10:80599015-80614402	1.28935	1.50931	0.227247	0.450813	0.637996	no
XLOC_001986	Eef2	chr10:80639375-80645254	345.826	263.302	-0.393326	0.0291662	0.100692	no
XLOC_001988	Dapk3	chr10:80645751-80655942	4.62354	2.96775	-0.639629	0.0693296	0.188527	no
XLOC_001992	Apba3	chr10:80730916-80754012	2.62625	1.66739	-0.65541	0.110143	0.258141	no
XLOC_001993	Pip5k1c	chr10:80755716-80782719	4.66103	4.7032	0.0129925	0.958246	0.981422	no
XLOC_001994	2510012J08Rik	chr10:80783847-80788996	6.28639	4.44659	-0.499533	0.0501135	0.150184	no
XLOC_001997	Dohh	chr10:80847172-80852665	8.49533	4.44229	-0.935367	0.00425855	0.0221924	yes
XLOC_001999	2210404O07Rik	chr10:80855808-80857824	1.3542	1.04473	-0.374316	0.642516	0.788569	no
XLOC_002000	Aes	chr10:81022304-81029109	2.55076	16.3765	2.68263	1.8876e-12	8.2302e-11	yes
XLOC_002002	BC025920	chr10:81069052-81072581	1.00159	2.09268	1.06307	0.0120771	0.0510416	no
XLOC_002004	Gm10778	chr10:81111813-81130106	1.33559	1.13704	-0.232198	0.386485	0.580952	no
XLOC_002005	Zfp433	chr10:81167569-81184721	3.15102	2.92437	-0.107691	0.672625	0.810291	no
XLOC_002006	Gm10778	chr10:81274930-81289235	1.2694	1.06991	-0.246658	0.366909	0.561972	no
XLOC_002007	Zfp433	chr10:81326678-81343831	2.40163	2.12356	-0.177526	0.524632	0.698233	no
XLOC_002008	Zfp873	chr10:81510868-81525282	4.85917	3.8966	-0.318494	0.218294	0.40088	no
XLOC_002009	AU041133	chr10:81590754-81620657	1.44883	1.31727	-0.13734	0.697465	0.827097	no
XLOC_002011	Tdg	chr10:82092582-82153395	48.7866	40.9079	-0.254107	0.118754	0.270507	no
XLOC_002012	Hcfc2	chr10:82161751-82204159	1.08386	3.11765	1.52428	0.000148991	0.0013252	yes
XLOC_002014	Txnrd1	chr10:82296695-82360469	41.0841	37.515	-0.131113	0.433203	0.62322	no
XLOC_002015	Eid3	chr10:82296695-82360469	1.66955	1.10095	-0.60071	0.671005	0.8089	no
XLOC_002016	Chst11	chr10:82448241-82658642	2.72348	2.39999	-0.182422	0.464548	0.648476	no
XLOC_002017	D10Wsu102e	chr10:82822965-82831580	30.827	25.5468	-0.271051	0.0894151	0.225124	no
XLOC_002018	A230046K03Rik	chr10:83006685-83059218	17.9179	11.5841	-0.629257	7.24344e-05	0.00071247	yes
XLOC_002019	1500009L16Rik	chr10:83185609-83225509	9.81522	6.32571	-0.633793	0.0164493	0.0647853	no
XLOC_002021	Polr3b	chr10:84085053-84189923	12.893	9.75494	-0.402378	0.0398822	0.126977	no
XLOC_002022	Rfx4	chr10:84218792-84369283	3.31484	9.65332	1.54209	1.42966e-11	5.33432e-10	yes
XLOC_002023	Ric8b	chr10:84380360-84481428	9.39125	9.26739	-0.0191536	0.9258	0.965498	no
XLOC_002024	AI597468	chr10:84565371-84580492	13.1929	14.3676	0.123061	0.453968	0.640103	no
XLOC_002025	Btbd11	chr10:84849558-85123037	0.984765	1.76712	0.843551	0.0243082	0.0876829	no
XLOC_002026	Pwp1	chr10:85334575-85351848	29.853	19.7061	-0.599238	0.000278404	0.0022657	yes
XLOC_002028	Fbxo7	chr10:85484673-85961641	2.79204	1.9795	-0.496184	0.373001	0.567537	no
XLOC_002030	Timp3	chr10:85484673-85961641	4.66417	2.62359	-0.830079	0.00144759	0.00913562	yes
XLOC_002031	1810014B01Rik	chr10:86148271-86152699	2.03089	1.87472	-0.115436	0.74186	0.856088	no
XLOC_002040	Nup37	chr10:87609736-87641140	32.37	15.561	-1.05673	3.24137e-08	7.19597e-07	yes
XLOC_002041	Ccdc53	chr10:87663841-87708903	12.1532	7.75231	-0.648635	0.0292289	0.100878	no
XLOC_002042	Gnptab	chr10:87842156-87910074	6.80538	7.11214	0.0636078	0.741618	0.856026	no
XLOC_002044	Arl1	chr10:88194106-88206871	43.7911	34.3315	-0.351107	0.0302588	0.103318	no
XLOC_002046	Uhrf1bp1l	chr10:89207735-89283284	10.0417	9.5413	-0.073741	0.671546	0.809317	no
XLOC_002048	Ikbip	chr10:90545783-90565358	5.41357	3.39152	-0.674648	0.0478334	0.144824	no
XLOC_002049	Cdk17	chr10:92623549-92705699	9.85565	8.99821	-0.131313	0.492555	0.670844	no
XLOC_002050	Mir1931	chr10:92623549-92705699	10.7819	0	-1.79769e+308	0.41125	0.604588	no
XLOC_002052	Lta4h	chr10:92916140-92947650	13.2543	10.9062	-0.281305	0.184738	0.359119	no
XLOC_002056	Ntn4	chr10:93103778-93209954	0.259048	3.47107	3.74409	3.71314e-06	5.19161e-05	yes
XLOC_002057	Usp44	chr10:93294299-93321141	16.2739	7.19712	-1.17707	3.4842e-07	6.32401e-06	yes
XLOC_002058	Fgd6	chr10:93498745-93608084	4.01724	2.93877	-0.450991	0.0158292	0.0628864	no
XLOC_002059	Nr2c1	chr10:93610675-93660130	2.64465	2.94263	0.154027	0.569897	0.73388	no
XLOC_002060	Ndufa12	chr10:93661753-93683693	42.803	69.706	0.703571	0.00105589	0.00702051	yes
XLOC_002062	Ccdc41	chr10:94151534-94253081	17.8418	15.2447	-0.226956	0.182926	0.356807	no
XLOC_002063	2310039L15Rik	chr10:94798909-94825850	8.15513	8.69178	0.0919441	0.792583	0.887858	no
XLOC_002065	Ube2n	chr10:94977650-95008292	35.681	27.731	-0.36366	0.0223199	0.0822694	no
XLOC_002066	Eea1	chr10:95403296-95508152	2.52532	3.66023	0.535472	0.00592053	0.0289537	yes
XLOC_002067	Btg1	chr10:96079634-96087661	4.91175	7.20554	0.552869	0.00550041	0.0273534	yes
XLOC_002075	Atp2b1	chr10:98377276-98488777	20.7616	17.6377	-0.235259	0.211903	0.393182	no
XLOC_002076	Poc1b	chr10:98569804-98660711	15.7098	19.6723	0.324507	0.0781969	0.205124	no
XLOC_002077	Galnt4	chr10:98569804-98660711	1.42253	1.65514	0.218492	0.607402	0.763079	no
XLOC_002078	Dusp6	chr10:98725864-98730123	8.54081	8.42451	-0.0197805	0.920791	0.963175	no
XLOC_002080	Kitl	chr10:99478457-99563050	2.64736	3.79742	0.520465	0.0141949	0.057785	no
XLOC_002085	Cep290	chr10:99950085-100051893	5.40833	6.66671	0.301791	0.10078	0.243203	no
XLOC_002090	Slc6a15	chr10:102830379-102882324	1.85638	2.22177	0.259221	0.373634	0.568002	no
XLOC_002093	Ccdc59	chr10:105200240-105285493	20.5295	12.811	-0.680313	0.0100644	0.044392	yes
XLOC_002096	Ppp1r12a	chr10:107599405-107716986	16.4269	21.2713	0.372845	0.0270002	0.0950895	no
XLOC_002097	Pawr	chr10:107769244-107851932	26.9852	17.9172	-0.590822	0.00101625	0.00680854	yes
XLOC_002099	E2f7	chr10:110182520-110224443	7.46084	10.8889	0.545442	0.00192611	0.0114853	yes
XLOC_002100	Csrp2	chr10:110357231-110377465	17.8558	12.5531	-0.50835	0.0623656	0.175344	no
XLOC_002101	Osbpl8	chr10:110601857-110734305	5.22275	3.90842	-0.418226	0.0209979	0.0783779	no
XLOC_002102	Bbs10	chr10:110735734-110738792	4.34309	3.68943	-0.235324	0.320096	0.514352	no
XLOC_002103	Nap1l1	chr10:110909994-110935206	1021.48	570.658	-0.839958	0.00604489	0.029441	yes
XLOC_002104	Gm5176	chr10:110937843-110938401	1.72531	0.873179	-0.982505	0.191192	0.367291	no
XLOC_002105	Phlda1	chr10:110943341-110945705	71.7726	1.71278	-5.38902	0	0	yes
XLOC_002106	Krr1	chr10:111409723-111434320	22.832	15.6742	-0.542669	0.000841188	0.00582954	yes
XLOC_002112	Zfc3h1	chr10:114822014-114869827	9.99809	9.68469	-0.0459467	0.789343	0.885628	no
XLOC_002124	Mdm1	chr10:117578842-117606055	8.35742	10.124	0.276643	0.180607	0.354414	no
XLOC_002129	Grip1	chr10:118891369-119514212	4.18495	6.87019	0.715137	0.0141276	0.0575479	no
XLOC_002130	Tmbim4	chr10:119645881-119661953	20.3213	11.4763	-0.824326	0.000872784	0.00600286	yes
XLOC_002131	Llph	chr10:119664115-119669126	63.1595	32.6421	-0.952267	1.74784e-08	4.0503e-07	yes
XLOC_002134	Gm15910	chr10:120218156-120336027	0.823648	1.36765	0.731604	0.132587	0.290373	no
XLOC_002136	Gns	chr10:120802145-120834306	14.2359	9.8253	-0.534959	0.00390202	0.0206779	yes
XLOC_002138	BC048403	chr10:121176992-121192766	3.09147	1.35792	-1.18689	0.000165816	0.00145457	yes
XLOC_002141	Ppm1h	chr10:122115817-122382849	1.81534	0.75581	-1.26414	5.74274e-05	0.00058469	yes
XLOC_002144	Lrig3	chr10:125403259-125452415	11.0371	1.47476	-2.90381	0	0	yes
XLOC_002145	Ctdsp2	chr10:126415772-126437031	33.3574	33.1517	-0.00892436	0.956831	0.980978	no
XLOC_002147	Mettl1	chr10:126478987-126484639	10.7006	6.67428	-0.681011	0.0482679	0.145748	no
XLOC_002149	Cdk4	chr10:126500658-126504338	510.914	392.86	-0.379065	0.0346064	0.114345	no
XLOC_002150	LOC100504703	chr10:126507536-126508157	2.84244	1.35993	-1.0636	0.252167	0.441159	no
XLOC_002152	B4galnt1	chr10:126602211-126609396	3.92254	0.909675	-2.10837	4.29905e-05	0.000454379	yes
XLOC_002154	Dctn2	chr10:126703317-126725827	24.9451	20.036	-0.31616	0.131145	0.288435	no
XLOC_002155	Ddit3	chr10:126727848-126748842	1.41094	2.13063	0.594618	0.666692	0.806119	no
XLOC_002157	R3hdm2	chr10:126827296-126936790	9.56522	15.5901	0.704757	0.000198788	0.00169488	yes
XLOC_002159	Ndufa4l2	chr10:126951994-126959504	1.7366	0.101317	-4.09933	0.213901	0.395573	no
XLOC_002160	Stat6	chr10:127080041-127103759	1.65956	0.206065	-3.00963	1.10136e-08	2.65012e-07	yes
XLOC_002162	Tmem194	chr10:127114120-127138103	5.22115	3.80424	-0.456759	0.0345353	0.114199	no
XLOC_002165	Zbtb39	chr10:127176593-127184395	10.4849	9.37918	-0.160782	0.342529	0.537493	no
XLOC_002173	Prim1	chr10:127452270-127467086	36.2103	48.0528	0.408222	0.014607	0.0591229	no
XLOC_002174	Naca	chr10:127472401-127485693	758.541	441.643	-0.780347	6.35109e-06	8.31332e-05	yes
XLOC_002175	Ptges3	chr10:127496037-127514310	319.785	198.223	-0.689978	9.26807e-05	0.000881272	yes
XLOC_002176	Atp5b	chr10:127520362-127527444	893.403	1148.98	0.362975	0.097094	0.237505	no
XLOC_002178	Baz2a	chr10:127529838-127617353	14.7626	10.6691	-0.468504	0.0189383	0.072182	no
XLOC_002181	Timeless	chr10:127669118-127689997	11.7888	13.0187	0.143173	0.447563	0.635284	no
XLOC_002184	Stat2	chr10:127707631-127729905	1.50188	1.50742	0.0053141	0.985781	0.993227	no
XLOC_002185	Pan2	chr10:127740390-127758414	8.28447	10.6199	0.358292	0.067022	0.184492	no
XLOC_002186	Cnpy2	chr10:127759514-127764243	60.5028	38.1595	-0.664961	0.000243352	0.0020182	yes
XLOC_002187	Cs	chr10:127774887-127799535	67.9009	101.486	0.579777	0.000275012	0.00224192	yes
XLOC_002188	Ankrd52	chr10:127814179-127832135	5.35712	7.44965	0.475714	0.0173429	0.0675402	no
XLOC_002189	Rnf41	chr10:127848671-127882120	4.83326	4.64014	-0.0588283	0.796747	0.89023	no
XLOC_002190	Smarcc2	chr10:127896291-127927230	8.91253	23.876	1.42165	1.14797e-13	5.97101e-12	yes
XLOC_002192	Wibg	chr10:128184934-128204300	9.80346	7.22405	-0.440483	0.187415	0.362537	no
XLOC_002194	Dnajc14,Sarnp	chr10:128241720-128328774	63.0944	45.168	-0.48221	0.0426554	0.133127	no
XLOC_002195	Cd63	chr10:128345974-128349874	28.731	15.3707	-0.902423	3.95393e-05	0.000421628	yes
XLOC_002215	Mir684-1	chr10:129102810-129102895	16.4066	122.126	2.89602	0.55057	0.719038	no
XLOC_002229	1700052N19Rik	chr10:5891400-5913936	9.41402	8.82546	-0.0931388	0.644915	0.79034	no
XLOC_002230	Akap12	chr10:5987067-6080212	16.5925	7.07969	-1.22877	1.32561e-12	5.9008e-11	yes
XLOC_002231	Mthfd1l	chr10:6179459-6373466	18.9011	11.4852	-0.718702	6.27182e-05	0.00062787	yes
XLOC_002232	Plekhg1	chr10:6379142-6606164	1.39545	3.23202	1.21171	7.71411e-07	1.28845e-05	yes
XLOC_002235	Pcmt1	chr10:7349152-7384421	16.1137	19.577	0.280875	0.127161	0.283041	no
XLOC_002237	BC013529	chr10:7487744-7500715	9.93722	7.25575	-0.453716	0.0525793	0.155615	no
XLOC_002238	Tab2	chr10:7625400-7675921	42.6278	34.6092	-0.300641	0.0750459	0.1989	no
XLOC_002240	Sash1	chr10:8442016-8605868	2.7774	1.98239	-0.486495	0.0238398	0.0865219	no
XLOC_002241	Samd5	chr10:9341703-9395006	0.698473	3.329	2.25281	2.02949e-12	8.76894e-11	yes
XLOC_002242	Stxbp5	chr10:9475318-9620838	1.27029	1.82179	0.5202	0.0396173	0.126445	no
XLOC_002246	Utrn	chr10:12101985-12581533	5.58154	6.03901	0.113649	0.489675	0.66906	no
XLOC_002250	Ltv1	chr10:12898443-12912943	45.3857	34.0137	-0.416122	0.0110873	0.0478302	yes
XLOC_002251	Phactr2	chr10:12927522-13194202	4.13254	7.05801	0.772231	2.61669e-05	0.000294105	yes
XLOC_002252	Pex3	chr10:13243647-13284471	6.27789	6.08331	-0.045423	0.881684	0.941342	no
XLOC_002253	Aig1	chr10:13366859-13588726	6.15788	3.588	-0.779255	0.0236911	0.0861132	no
XLOC_002255	Vta1	chr10:14375138-14425295	18.631	16.3158	-0.191436	0.340958	0.536039	no
XLOC_002256	Gje1	chr10:14425414-14478825	0.677034	1.78809	1.40112	0.0100388	0.0443157	yes
XLOC_002258	Heca	chr10:17618539-17667873	1.3603	2.03407	0.580447	0.0400103	0.127279	no
XLOC_002259	3110003A17Rik	chr10:17731066-17743058	66.7565	39.8939	-0.742741	4.17937e-05	0.000442708	yes
XLOC_002261	Ccdc28a	chr10:17933481-17954787	1.84949	0.711518	-1.37815	0.0277377	0.0969907	no
XLOC_002268	Pex7	chr10:19579895-19627480	6.88216	5.04628	-0.447642	0.0542723	0.159256	no
XLOC_002271	Myb	chr10:20844735-20880790	2.27097	2.10424	-0.110011	0.726024	0.845423	no
XLOC_002272	4930455C13Rik	chr10:21015784-21088695	1.29277	1.43362	0.1492	0.915585	0.96018	no
XLOC_002273	-	chr10:21774732-21778460	6.35293	2.54705	-1.3186	0.00659298	0.0315806	yes
XLOC_002275	E030030I06Rik	chr10:21832855-21869076	1.78074	1.28896	-0.466264	0.337546	0.532425	no
XLOC_002276	Tbpl1	chr10:22364816-22451253	26.1216	20.8462	-0.325457	0.0454363	0.139307	no
XLOC_002278	Eya4	chr10:22822306-23069758	1.22833	3.65157	1.57182	1.46825e-05	0.000175869	yes
XLOC_002279	Rps12	chr10:23504988-23507015	923.905	264.182	-1.80621	0	0	yes
XLOC_002280	Snora33	chr10:23504988-23507015	233.441	92.1215	-1.34145	0.826683	0.90799	no
XLOC_002281	Snord100	chr10:23504988-23507015	296.778	0	-1.79769e+308	0.46596	0.649027	no
XLOC_002288	Enpp3	chr10:24492901-24556001	6.69475	0.72339	-3.21018	0	0	yes
XLOC_002290	Akap7	chr10:24888895-25018969	3.15248	2.38732	-0.401093	0.182741	0.356647	no
XLOC_002293	Tmem200a	chr10:25710991-25799253	0.947083	1.28004	0.434628	0.25067	0.439678	no
XLOC_002294	L3mbtl3	chr10:25994266-26094991	4.11514	7.29291	0.825555	6.16485e-05	0.000620081	yes
XLOC_002297	4930519F09Rik	chr10:28641768-28643313	1.53629	2.05337	0.418536	0.314808	0.509405	no
XLOC_002299	Rnf146	chr10:29032971-29082248	8.35737	7.71208	-0.115928	0.537922	0.708921	no
XLOC_002300	Rspo3	chr10:29172912-29255673	1.17571	22.0488	4.2291	0	0	yes
XLOC_002301	Cenpw	chr10:29915814-29920346	8.88563	7.60825	-0.223909	0.287927	0.48116	no
XLOC_002302	Trmt11	chr10:30253136-30320555	3.91724	1.89218	-1.04978	0.000897403	0.00614788	yes
XLOC_002303	Hint3	chr10:30323000-30338215	4.45772	2.24722	-0.988164	0.0324961	0.109078	no
XLOC_002304	Ncoa7	chr10:30365387-30522913	2.48644	2.29131	-0.117911	0.712411	0.83682	no
XLOC_002306	Tpd52l1	chr10:31052133-31165727	1.91665	1.01448	-0.917848	0.0957326	0.235278	no
XLOC_002307	Gm3258	chr10:31052133-31165727	2.95567	1.32042	-1.16249	0.0361711	0.118013	no
XLOC_002308	Rnf217	chr10:31215040-31329531	4.82778	2.87869	-0.745946	0.0131552	0.05449	no
XLOC_002313	Zufsp	chr10:33638837-33671030	3.53955	4.22337	0.254829	0.373471	0.56789	no
XLOC_002314	A830082N09Rik	chr10:33707021-33714861	1.1255	1.27463	0.179517	0.448361	0.635851	no
XLOC_002315	Rwdd1	chr10:33716360-33739422	37.9764	22.831	-0.734111	5.60932e-05	0.000572019	yes
XLOC_002319	Dse	chr10:33871195-33927357	4.85925	1.33801	-1.86065	1.27351e-11	4.77032e-10	yes
XLOC_002320	Nt5dc1	chr10:34023355-34138334	2.30297	1.76188	-0.386379	0.170274	0.341028	no
XLOC_002321	Marcks	chr10:36853048-36858732	36.2064	163.034	2.17086	0	0	yes
XLOC_002323	1700025K23Rik	chr10:38838613-38853701	1.91479	1.43051	-0.420657	0.47887	0.660569	no
XLOC_002325	E130307A14Rik	chr10:39332702-39451813	2.09269	3.32306	0.667155	0.090507	0.227226	no
XLOC_002326	Traf3ip2	chr10:39332702-39451813	1.5437	1.6012	0.0527607	0.953393	0.979727	no
XLOC_002327	AA474331	chr10:39612473-39619044	1.29486	1.12748	-0.199692	0.837034	0.914792	no
XLOC_002331	Slc16a10	chr10:39753340-39862060	0.682283	1.21287	0.829987	0.111622	0.260081	no
XLOC_002332	Gtf3c6,Rpf2	chr10:39943051-39977911	98.6543	63.2422	-0.641495	0.00414228	0.0217166	yes
XLOC_002333	Amd1	chr10:40007263-40021994	67.752	40.2195	0	1	1	no
XLOC_002334	Cdc40	chr10:40551426-40602949	15.5011	17.5978	0.183023	0.272241	0.465416	no
XLOC_002336	Fig4	chr10:40907977-41023047	3.55538	3.78139	0.0889155	0.71423	0.838375	no
XLOC_002337	Smpd2	chr10:41206977-41210146	7.34002	10.0737	0.456743	0.073348	0.195891	no
XLOC_002339	Cep57l1	chr10:41438645-41529695	5.09116	4.18463	-0.282893	0.317945	0.512154	no
XLOC_002341	Foxo3	chr10:41901444-41996548	6.17664	4.31956	-0.515939	0.051726	0.153764	no
XLOC_002343	Nr2e1	chr10:42281776-42303394	8.19678	48.2264	2.55669	0	0	yes
XLOC_002344	Sobp	chr10:42717654-42894336	1.75746	3.83051	1.12405	0.00743843	0.0349482	yes
XLOC_002345	1700021F05Rik	chr10:43244926-43260800	7.31272	7.42292	0.0215785	0.947583	0.977141	no
XLOC_002346	Qrsl1	chr10:43593971-43621542	6.2048	6.86441	0.14575	0.663138	0.803551	no
XLOC_002348	Prdm1	chr10:44156980-44178493	1.66349	0.317328	-2.39017	3.3995e-13	1.66419e-11	yes
XLOC_002349	Lin28b	chr10:45096424-45190007	87.5036	32.3688	-1.43474	0	0	yes
XLOC_002351	Grik2	chr10:48817920-49508571	2.11772	4.81406	1.18474	2.86175e-05	0.000318654	yes
XLOC_002356	Gopc	chr10:52056829-52101930	6.38374	5.55163	-0.20149	0.283257	0.476776	no
XLOC_002358	Gm9766	chr10:52996502-53099657	1.82707	1.43904	-0.344422	0.200182	0.378299	no
XLOC_002360	Mcm9	chr10:53255636-53351259	3.47606	4.48838	0.368742	0.298633	0.4926	no
XLOC_002361	Fam184a	chr10:53352644-53471015	2.10354	2.48739	0.241813	0.407072	0.600614	no
XLOC_002363	D630037F22Rik	chr10:55734099-55948495	1.37591	1.7871	0.377234	0.118968	0.270865	no
XLOC_002365	Serinc1	chr10:57235581-57252335	19.9134	28.4984	0.517139	0.00152126	0.00949719	yes
XLOC_002369	Sept10	chr10:58604264-58684595	11.3995	6.52616	-0.80467	0.000843939	0.00584437	yes
XLOC_002371	Ccdc109a	chr10:58909731-59079440	3.30485	2.70219	-0.290452	0.271327	0.464463	no
XLOC_002372	Ddit4	chr10:59412422-59414518	4.87672	2.7657	-0.818266	0.00944758	0.0423443	yes
XLOC_002373	Anapc16	chr10:59450340-59562738	17.4515	18.1317	0.0551634	0.818203	0.903237	no
XLOC_002374	Chst3	chr10:59644275-59682008	1.19972	1.86501	0.636481	0.0226391	0.0831735	no
XLOC_002376	Slc29a3	chr10:60174819-60215530	0.703722	3.07714	2.12851	8.22091e-11	2.79496e-09	yes
XLOC_002377	Unc5b	chr10:60225342-60294329	5.51438	3.25144	-0.762117	0.000239514	0.00199328	yes
XLOC_002379	Sgpl1	chr10:60561386-60610413	8.32583	8.90477	0.0969846	0.59562	0.75361	no
XLOC_002381	X99384	chr10:60782404-60846271	4.11978	2.7485	-0.583924	0.0153215	0.0613276	no
XLOC_002382	Eif4ebp2	chr10:60891086-60915590	128.614	82.3786	-0.642706	0.00317805	0.0174953	yes
XLOC_002383	H2afy2	chr10:61178010-61246612	88.5513	83.347	-0.0873842	0.64524	0.790586	no
XLOC_002385	2010107G23Rik	chr10:61570403-61573761	1.0823	1.07737	-0.00657781	0.989579	0.99477	no
XLOC_002386	Tspan15	chr10:61648143-61693966	0.971562	1.53267	0.657671	0.0644012	0.179619	no
XLOC_002387	Hk1	chr10:61731371-61842656	1.8554	2.84687	0.617644	0.0376527	0.121886	no
XLOC_002389	Supv3l1	chr10:61891976-61914101	9.50569	7.60446	-0.321946	0.135655	0.29463	no
XLOC_002390	Vps26a	chr10:61917590-61949553	27.5828	34.9028	0.339575	0.0353615	0.116138	no
XLOC_002392	2510003E04Rik	chr10:62021217-62041205	6.16025	10.1801	0.724694	0.00101814	0.00681646	yes
XLOC_002393	Ddx21	chr10:62042994-62065046	60.1386	27.3786	-1.13524	9.04388e-13	4.11185e-11	yes
XLOC_002394	Ddx50	chr10:62078770-62113946	19.3999	16.346	-0.247105	0.153255	0.318922	no
XLOC_002396	Ccar1	chr10:62206675-62255116	48.0646	57.157	0.249955	0.12973	0.286243	no
XLOC_002397	Tet1	chr10:62267216-62350182	8.93364	7.19747	-0.311759	0.0598923	0.170595	no
XLOC_002398	Hnrnph3	chr10:62442970-62486659	96.3025	78.5899	-0.29323	0.0755626	0.20002	no
XLOC_002400	Sirt1	chr10:62781752-62801783	12.67	8.86522	-0.51519	0.00441291	0.0228429	yes
XLOC_002401	Lrrtm3	chr10:62892845-64466415	1.68225	0.168884	-3.31629	6.19504e-14	3.30305e-12	yes
XLOC_002403	Reep3	chr10:66471936-66719117	8.807	14.0272	0.671502	0.0128132	0.0533677	no
XLOC_002404	Nrbf2	chr10:66729436-66748029	6.56075	4.94968	-0.406523	0.124447	0.279222	no
XLOC_002405	Ado	chr10:67007258-67011703	12.3933	5.33386	-1.2163	5.12568e-12	2.07861e-10	yes
XLOC_002406	Zfp365	chr10:67348852-67375410	12.1675	2.57096	-2.24266	0	0	yes
XLOC_002407	Arid5b	chr10:67555271-67741539	1.53259	3.43155	1.16289	5.76213e-06	7.62217e-05	yes
XLOC_002410	Cdk1	chr10:68799382-68815692	82.3192	47.7088	0	1	1	no
XLOC_002411	Phyhipl	chr10:69903415-70062039	2.37442	3.82015	0.686055	0.00941898	0.0422618	yes
XLOC_002413	Bicc1	chr10:70386676-70622386	1.01886	1.55398	0.60901	0.169151	0.339883	no
XLOC_002415	Tfam	chr10:70688208-70700792	20.9221	15.2475	-0.456456	0.00687979	0.0327741	yes
XLOC_002416	Ube2d1	chr10:70717727-70748010	52.0283	30.3723	-0.776543	1.9823e-05	0.000230378	yes
XLOC_002417	Cisd1	chr10:70793241-70807597	38.1294	22.3644	-0.769701	8.02478e-05	0.000779312	yes
XLOC_002421	1110038D17Rik	chr10:74969558-74980067	2.72708	3.5339	0.373904	0.18417	0.358434	no
XLOC_002424	Cabin1	chr10:75108854-75227102	7.75482	8.37792	0.111499	0.556143	0.723421	no
XLOC_002425	Ddt	chr10:75233977-75236119	51.2315	28.6636	-0.837813	0.000172141	0.00149687	yes
XLOC_002429	Gstt2	chr10:75294589-75297626	1.19458	0.653857	-0.869457	0.164076	0.333324	no
XLOC_002430	Mif	chr10:75322097-75322995	1145.18	475.833	-1.26705	1.9984e-15	1.2666e-13	yes
XLOC_002431	Smarcb1	chr10:75359513-75384359	42.195	37.2934	-0.178153	0.332069	0.526355	no
XLOC_002432	Mmp11	chr10:75385879-75395208	2.67778	4.57448	0.772573	0.0640809	0.179009	no
XLOC_002434	Prmt2	chr10:75669966-75700610	5.74221	5.92237	0.0445689	0.871853	0.935721	no
XLOC_002435	Dip2a	chr10:75725793-75808036	0.315369	1.78738	2.50273	3.99299e-09	1.03087e-07	yes
XLOC_002436	Pcnt	chr10:75813930-75906836	6.30433	6.04283	-0.0611184	0.722052	0.843195	no
XLOC_002437	Ybey	chr10:75911825-75978602	2.13925	1.74807	-0.291343	0.466738	0.64964	no
XLOC_002438	4930483K19Rik	chr10:75994371-76024971	1.67161	3.39313	1.02137	0.0118768	0.0504176	no
XLOC_002441	Pcbp3	chr10:76224598-76424692	9.48345	8.38495	-0.17761	0.453956	0.640103	no
XLOC_002442	Col18a1	chr10:76514923-76629275	12.6417	6.84524	-0.88502	1.5394e-06	2.37435e-05	yes
XLOC_002444	Adarb1	chr10:76753471-76881018	1.42146	1.43427	0.0129363	0.965892	0.985342	no
XLOC_002445	1810008A18Rik	chr10:76949399-76978558	6.9703	4.08569	-0.77064	0.00167714	0.0102892	yes
XLOC_002450	Lrrc3	chr10:77360319-77365281	1.29492	1.94628	0.587862	0.0582547	0.167381	no
XLOC_002452	Pfkl	chr10:77449693-77472541	60.2294	23.2243	-1.37483	0	0	yes
XLOC_002454	D10Jhu81e	chr10:77623787-77632513	2.78263	2.90325	0.06122	0.898653	0.951058	no
XLOC_002455	Pwp2	chr10:77633654-77647894	7.38576	4.3085	-0.777561	0.000208367	0.00176242	yes
XLOC_002456	Trappc10	chr10:77649424-77707387	2.90087	4.23747	0.546719	0.0277906	0.0970861	no
XLOC_002457	Agpat3	chr10:77730360-77814445	4.92512	6.00724	0.286542	0.265671	0.457756	no
XLOC_002458	Rrp1	chr10:77863106-77875788	79.9337	65.6819	-0.283308	0.0751901	0.199172	no
XLOC_002459	Pdxk	chr10:77899491-77927693	3.46017	2.35024	-0.558036	0.0161246	0.063703	no
XLOC_002460	Syde1	chr10:78037244-78054709	3.37349	5.74545	0.768179	0.00598382	0.0292035	yes
XLOC_002465	2610008E11Rik	chr10:78527029-78560345	5.84989	6.06527	0.0521633	0.79084	0.886736	no
XLOC_002466	Ppap2c	chr10:78988048-78996532	2.27251	4.2852	0.915074	0.022569	0.0829482	no
XLOC_002467	Mier2	chr10:79002989-79017857	3.09222	1.88328	-0.715398	0.0338031	0.112311	no
XLOC_002470	Shc2	chr10:79080667-79100663	11.9026	5.87968	-1.01747	3.18441e-06	4.53855e-05	yes
XLOC_002472	Polrmt	chr10:79198869-79209326	3.17196	3.52601	0.152663	0.57162	0.735012	no
XLOC_002473	Rnf126	chr10:79221259-79229697	14.0508	9.08598	-0.62894	0.0187026	0.0715257	no
XLOC_002475	E130317F20Rik	chr10:79314121-79337379	0.963414	1.00396	0.0594692	0.979818	0.990792	no
XLOC_002476	BC005764	chr10:79314121-79337379	6.09341	7.46468	0.292831	0.827346	0.908353	no
XLOC_002477	Med16	chr10:79357451-79371683	12.4641	9.81159	-0.345215	0.0924331	0.230509	no
XLOC_002478	C030046I01Rik	chr10:79372794-79379675	28.0726	21.9016	-0.358125	0.0587485	0.168314	no
XLOC_002479	ORF61	chr10:79433468-79447075	10.2813	8.4223	-0.28774	0.213996	0.395606	no
XLOC_002480	Polr2e	chr10:79498697-79502404	56.9009	21.7191	-1.38949	1.44285e-12	6.36348e-11	yes
XLOC_002482	Dos	chr10:79579280-79602112	2.35243	3.43811	0.547462	0.14443	0.307103	no
XLOC_002483	Gamt	chr10:79720895-79723713	1.14462	2.25758	0.979909	0.130575	0.287577	no
XLOC_002484	2310011J03Rik	chr10:79763836-79783293	5.19868	3.28883	-0.660571	0.132834	0.290723	no
XLOC_002487	Mex3d	chr10:79843099-79850396	15.2158	12.0774	-0.333266	0.0715967	0.192639	no
XLOC_002488	Mbd3	chr10:79855285-79862224	21.841	22.9178	0.069433	0.737421	0.85346	no
XLOC_002489	Uqcr11	chr10:79865741-79869566	90.5103	43.3561	-1.06185	2.93222e-06	4.2168e-05	yes
XLOC_002490	Tcf3	chr10:79871909-79896398	30.1701	24.3928	-0.306662	0.0853619	0.218437	no
XLOC_002492	Rexo1	chr10:80003670-80024305	5.03201	5.84352	0.215704	0.316479	0.510555	no
XLOC_002493	Klf16	chr10:80029865-80040041	1.83274	0.703469	-1.38144	0.000988128	0.00664159	yes
XLOC_002494	Fam108a	chr10:80046393-80053086	10.2975	9.30807	-0.145747	0.596686	0.754162	no
XLOC_002495	Btbd2	chr10:80105361-80119816	7.68329	7.77743	0.0175702	0.941607	0.974187	no
XLOC_002496	Mknk2	chr10:80127923-80138677	9.68524	6.50091	-0.575146	0.00903326	0.0408954	yes
XLOC_002497	Mob3a	chr10:80147997-80164565	2.44798	3.05231	0.318307	0.294071	0.48751	no
XLOC_002498	Ap3d1	chr10:80169698-80204989	9.62369	10.168	0.0793807	0.689281	0.820907	no
XLOC_002499	Plekhj1	chr10:80258842-80267667	11.7433	6.01502	-0.965198	0.00643767	0.0309451	yes
XLOC_002502	Lsm7	chr10:80315569-80317954	108.825	55.2368	-0.978304	1.39063e-06	2.16583e-05	yes
XLOC_002503	Timm13	chr10:80342560-80363714	18.6614	7.87935	-1.24391	5.36702e-07	9.26332e-06	yes
XLOC_002504	Lmnb2	chr10:80364062-80381152	10.7546	8.87995	-0.276336	0.173138	0.344724	no
XLOC_002505	Gng7	chr10:80411368-80477670	0.989107	1.31488	0.410739	0.304041	0.497959	no
XLOC_002507	Slc39a3	chr10:80491284-80496657	0.630855	1.2008	0.928615	0.0513179	0.152979	no
XLOC_002508	Sgta	chr10:80506815-80522911	25.3341	21.6345	-0.227748	0.241417	0.429138	no
XLOC_002510	Pias4	chr10:80615986-80630477	9.76465	8.78289	-0.152873	0.592273	0.750626	no
XLOC_002512	Atcay	chr10:80657435-80693524	0.5777	1.83826	1.66995	0.00014583	0.00130132	yes
XLOC_002513	Mrpl54	chr10:80727466-80729671	15.5192	10.4922	-0.564743	0.0870307	0.2212	no
XLOC_002516	Hmg20b	chr10:80808783-80813202	4.59503	7.09736	0.627208	0.101395	0.243996	no
XLOC_002517	4930404N11Rik	chr10:80820314-80829257	0.857844	1.1041	0.36409	0.575512	0.738326	no
XLOC_002518	Fzr1	chr10:80829615-80841115	10.7119	9.40003	-0.188473	0.415451	0.607869	no
XLOC_002520	Celf5	chr10:80921972-80945454	1.24325	1.92744	0.632572	0.38814	0.582424	no
XLOC_002521	Ncln	chr10:80949203-80959108	9.28834	6.23188	-0.575755	0.00970524	0.0431617	yes
XLOC_002524	Gna11	chr10:80991476-81007791	16.8242	14.7333	-0.191462	0.279051	0.472474	no
XLOC_002526	Sirt6	chr10:81083062-81090573	6.67055	7.08147	0.0862429	0.77409	0.876564	no
XLOC_002527	Zfp781	chr10:81205565-81233887	1.90273	2.04929	0.107048	0.661476	0.802607	no
XLOC_002528	Zfp781	chr10:81364655-81393225	2.11604	2.25017	0.088665	0.708263	0.834601	no
XLOC_002529	Zfp938	chr10:81687390-81704031	3.90224	3.26271	-0.258231	0.367987	0.562772	no
XLOC_002531	1190007I07Rik	chr10:82082595-82085973	6.46986	2.07318	-1.64189	0.0101665	0.0447247	yes
XLOC_002533	Nfyb	chr10:82211444-82226886	21.0674	15.6958	-0.424637	0.0111747	0.048131	yes
XLOC_002536	Appl2	chr10:83062406-83111409	3.79414	4.38039	0.207284	0.466663	0.649629	no
XLOC_002537	Nuak1	chr10:83833652-83903216	3.18869	3.4032	0.0939305	0.701407	0.829818	no
XLOC_002538	Ckap4	chr10:83989049-83996633	22.3326	16.3973	-0.445693	0.00936734	0.0420893	yes
XLOC_002541	Mterfd3	chr10:84582177-84590772	3.05252	3.44579	0.174834	0.571992	0.735273	no
XLOC_002542	Cry1	chr10:84594444-84647799	10.9512	7.79484	-0.4905	0.00978518	0.0434264	yes
XLOC_002543	Prdm4	chr10:85353715-85379690	15.871	15.8932	0.0020083	0.990676	0.995252	no
XLOC_002544	D10Wsu52e	chr10:85401381-85420538	62.607	38.8161	-0.689668	1.82666e-05	0.000214372	yes
XLOC_002546	Syn3	chr10:85484673-85961641	1.25569	2.19689	0.806985	0.0141077	0.0575278	no
XLOC_002547	Hsp90b1	chr10:86153585-86168189	548.715	344.845	-0.670112	0.00167847	0.010294	yes
XLOC_002549	Ascl1	chr10:86953785-86956405	0.964828	44.5586	5.52929	0	0	yes
XLOC_002550	4930547N16Rik	chr10:87553816-87609686	7.89189	5.95171	-0.407066	0.0364969	0.118807	no
XLOC_002552	Chpt1	chr10:87922331-87966715	2.35417	4.64779	0.981323	0.00822646	0.0379977	yes
XLOC_002556	Utp20	chr10:88209351-88289559	13.2121	8.62593	-0.615104	0.000122484	0.00112391	yes
XLOC_002558	Gas2l3	chr10:88871567-88906712	9.46808	3.70617	-1.35314	2.73115e-14	1.52411e-12	yes
XLOC_002561	Scyl2	chr10:89101463-89149037	15.4917	13.6197	-0.185796	0.321342	0.515513	no
XLOC_002562	Actr6	chr10:89174717-89195040	10.9784	7.22049	-0.6045	0.00989197	0.0438089	yes
XLOC_002563	Apaf1	chr10:90452055-90545488	5.48987	5.87717	0.0983488	0.600259	0.757287	no
XLOC_002564	Slc25a3	chr10:90579322-90586708	174.095	155.523	-0.162751	0.315622	0.509986	no
XLOC_002565	Tmpo	chr10:90610315-90634327	106.8	123.082	0.204708	0.277397	0.470839	no
XLOC_002566	Mir135a-2	chr10:91532247-91535520	2.19072	2.05983	-0.0888777	0.732941	0.850514	no
XLOC_002567	Rmst	chr10:91537381-91627976	8.82472	6.92564	-0.349603	0.165284	0.334925	no
XLOC_002570	Nedd1	chr10:92147489-92185163	11.8045	8.61392	-0.45459	0.00849623	0.0389711	yes
XLOC_002572	-	chr10:92367038-92390588	0.400681	1.12254	1.48625	0.244069	0.432367	no
XLOC_002576	-	chr10:92491210-92491926	0.141469	1.06115	2.90707	0.0927314	0.231026	no
XLOC_002579	Elk3	chr10:92709944-92773904	1.21139	2.35564	0.959458	0.00604786	0.029441	yes
XLOC_002581	Snrpf	chr10:93003376-93067990	52.6424	19.2057	-1.45469	5.69322e-13	2.6644e-11	yes
XLOC_002582	Gm8580	chr10:93103778-93209954	60.9608	29.3165	-1.05617	9.56826e-06	0.000120255	yes
XLOC_002584	Metap2	chr10:93321234-93353947	61.306	39.7193	-0.626189	0.00017228	0.00149687	yes
XLOC_002585	Mir331	chr10:93424268-93426612	0.938627	1.05066	0.162666	0.687877	0.820607	no
XLOC_002586	Vezt	chr10:93426854-93498604	3.49995	4.07542	0.219614	0.352081	0.546879	no
XLOC_002588	4932415G12Rik	chr10:94136237-94151358	0.556411	1.10306	0.987292	0.00861285	0.039421	yes
XLOC_002589	Plxnc1	chr10:94253258-94407212	1.65127	4.28558	1.37591	2.50342e-09	6.69245e-08	yes
XLOC_002590	Cradd	chr10:94636308-94786731	3.84049	3.11867	-0.300357	0.387407	0.581709	no
XLOC_002591	Socs2	chr10:94874123-94879491	8.33528	6.58465	-0.340123	0.164596	0.33406	no
XLOC_002592	Mrpl42	chr10:94943439-94964590	79.9745	55.7852	-0.519657	0.00572897	0.0282188	yes
XLOC_002593	Nudt4	chr10:95009640-95026801	12.4442	31.9523	1.36044	8.88178e-16	5.96513e-14	yes
XLOC_002602	Tmtc3	chr10:99906535-99949981	10.7934	9.69884	-0.154263	0.374063	0.56852	no
XLOC_002603	4930430F08Rik	chr10:99950085-100051893	3.77748	2.87685	-0.392933	0.37467	0.569203	no
XLOC_002605	Alx1	chr10:102470480-102491411	1.71732	0.242782	-2.82243	1.69026e-08	3.93113e-07	yes
XLOC_002607	Tmtc2	chr10:104624718-105011535	2.27271	2.23414	-0.0246929	0.924823	0.964846	no
XLOC_002608	BC067068	chr10:105200240-105285493	4.20737	3.37421	-0.318368	0.400463	0.594068	no
XLOC_002614	Syt1	chr10:107934705-108448031	0.51311	1.46262	1.51122	0.000458362	0.0034614	yes
XLOC_002618	Zdhhc17	chr10:110377772-110447122	6.85015	8.65486	0.337375	0.133404	0.291428	no
XLOC_002621	Glipr1	chr10:111409723-111434320	6.24473	4.23445	-0.560465	0.474352	0.65656	no
XLOC_002622	Atxn7l3b	chr10:112362483-112366082	52.2192	46.7931	-0.158286	0.315717	0.510003	no
XLOC_002625	Tbc1d15	chr10:114634926-114688549	14.5796	9.05765	-0.686746	4.00529e-05	0.000426629	yes
XLOC_002626	Rab21	chr10:114723428-114752647	11.396	11.1169	-0.0357733	0.875283	0.937657	no
XLOC_002627	Tmem19	chr10:114777795-114799318	3.1653	2.42332	-0.385357	0.143679	0.306247	no
XLOC_002628	Thap2	chr10:114805260-114821614	6.53713	6.08968	-0.10229	0.585222	0.745772	no
XLOC_002629	Lgr5	chr10:114887369-115024836	1.79239	0.226526	-2.98413	3.33067e-15	2.05653e-13	yes
XLOC_002632	Cnot2	chr10:115922216-116018567	29.6495	28.8176	-0.0410612	0.81489	0.901242	no
XLOC_002635	Rab3ip	chr10:116341798-116387470	10.9215	11.1428	0.0289417	0.881891	0.941401	no
XLOC_002636	Cct2	chr10:116488053-116500870	216.451	133.233	-0.700091	1.76768e-05	0.000208088	yes
XLOC_002637	Frs2	chr10:116506426-116585578	11.3715	11.7141	0.0428129	0.800112	0.892233	no
XLOC_002638	Yeats4	chr10:116652196-116661563	68.5728	54.6579	-0.327208	0.0443224	0.136847	no
XLOC_002642	Cpsf6	chr10:116781723-116814029	44.8054	30.9644	-0.533063	0.031073	0.105437	no
XLOC_002643	Mdm2	chr10:117125941-117147784	20.3334	23.7628	0.224848	0.193526	0.370021	no
XLOC_002644	Slc35e3	chr10:117169226-117183436	7.38952	7.87566	0.0919199	0.703744	0.83144	no
XLOC_002645	Nup107	chr10:117187698-117229761	43.7343	34.2292	-0.353536	0.0569936	0.164741	no
XLOC_002646	Rap1b	chr10:117251000-117283060	37.8102	27.852	-0.440994	0.0128221	0.0533769	no
XLOC_002648	Dyrk2	chr10:118291856-118306041	8.87577	8.03158	-0.14419	0.382255	0.576348	no
XLOC_002649	Cand1	chr10:118635867-118677111	31.3644	28.1717	-0.154883	0.337143	0.532056	no
XLOC_002651	Helb	chr10:119520663-119550021	2.5194	2.64978	0.072792	0.763271	0.870882	no
XLOC_002653	Hmga2	chr10:119798321-119913991	121.918	330.43	1.43844	5.65326e-13	2.65218e-11	yes
XLOC_002655	Msrb3	chr10:120218156-120336027	1.68914	7.70246	2.18903	4.39648e-14	2.38394e-12	yes
XLOC_002656	Lemd3	chr10:120360466-120416386	0.624723	4.05051	2.69682	2.38227e-11	8.63619e-10	yes
XLOC_002658	Rassf3	chr10:120847406-120913306	3.54595	1.25393	-1.49971	6.05752e-08	1.26996e-06	yes
XLOC_002659	Tbk1	chr10:120983512-121023850	9.1662	8.45354	-0.116768	0.536391	0.708024	no
XLOC_002660	Xpot	chr10:121024382-121063538	27.211	19.1141	-0.509556	0.001574	0.00976597	yes
XLOC_002661	Srgap1	chr10:121218046-121484371	1.40175	3.33206	1.24918	1.35294e-06	2.11921e-05	yes
XLOC_002663	Tmem5	chr10:121517575-121534158	12.2545	7.19012	-0.769218	0.00211004	0.012431	yes
XLOC_002664	A130077B15Rik	chr10:122002078-122006947	26.2475	22.8832	-0.19789	0.22855	0.414033	no
XLOC_002666	Mon2	chr10:122429116-122513561	4.21942	4.17946	-0.0137288	0.939073	0.972774	no
XLOC_002667	Usp15	chr10:122550299-122634039	30.9953	20.7673	-0.577737	0.00037611	0.00294387	yes
XLOC_002668	Slc16a7	chr10:124659312-124765591	0.600481	1.07646	0.842103	0.115684	0.265918	no
XLOC_002669	Xrcc6bp1	chr10:126305483-126338427	7.6923	3.69629	-1.05734	0.0118419	0.0503256	no
XLOC_002670	Tsfm	chr10:126459387-126467870	10.6093	7.1344	-0.57246	0.0389495	0.124859	no
XLOC_002672	March9	chr10:126491565-126497240	3.44822	2.17155	-0.667128	0.102554	0.24582	no
XLOC_002673	Tspan31	chr10:126504345-126507317	43.5392	32.6743	-0.414157	0.0150749	0.060505	no
XLOC_002674	Os9	chr10:126515962-126558216	2.05119	2.90477	0.501962	0.145086	0.308148	no
XLOC_002675	Slc26a10	chr10:126609481-126617701	1.23028	0.272841	-2.17285	0.0438491	0.13568	no
XLOC_002676	Arhgef25	chr10:126619576-126627110	7.93922	6.26192	-0.342393	0.174779	0.347133	no
XLOC_002677	Dtx3	chr10:126627431-126648678	6.2757	8.04733	0.358735	0.249288	0.438205	no
XLOC_002678	Pip4k2c	chr10:126627431-126648678	4.21145	2.9871	-0.49557	0.0615889	0.17385	no
XLOC_002679	Kif5a	chr10:126662750-126700419	1.0101	1.91191	0.920522	0.00817908	0.0378337	yes
XLOC_002680	Mbd6	chr10:126703317-126725827	4.13065	5.31966	0.364964	0.261873	0.453538	no
XLOC_002681	Mars	chr10:126727848-126748842	31.3357	24.6958	-0.343544	0.0437615	0.135471	no
XLOC_002682	Gli1	chr10:126760782-126778635	0.790538	1.37267	0.796077	0.165877	0.335629	no
XLOC_002685	Shmt2	chr10:126951994-126959504	39.8517	27.5289	-0.533698	0.00149269	0.00935516	yes
XLOC_002687	Lrp1	chr10:126975137-127058204	7.32167	4.82396	-0.601954	0.00164202	0.0101028	yes
XLOC_002688	Nab2	chr10:127080041-127103759	1.98647	1.3476	-0.559816	0.255133	0.445048	no
XLOC_002692	Rbms2	chr10:127529838-127617353	15.8411	12.3693	-0.356909	0.150513	0.315446	no
XLOC_002693	Spryd4	chr10:127631690-127648850	7.25807	5.8247	-0.317402	0.237299	0.424578	no
XLOC_002695	Coq10a	chr10:127800152-127807093	1.64906	1.55657	-0.0832727	0.832236	0.911631	no
XLOC_002696	Slc39a5	chr10:127832278-127838280	1.3656	1.69136	0.308653	0.430081	0.620875	no
XLOC_002697	Obfc2b	chr10:127838450-127846914	53.3521	52.3368	-0.0277169	0.894301	0.94857	no
XLOC_002698	Myl6	chr10:127927915-127930930	127.251	70.7757	-0.84635	2.35109e-05	0.000267552	yes
XLOC_002699	Myl6b	chr10:127931212-127935741	2.6083	3.5949	0.462841	0.323322	0.517407	no
XLOC_002700	Esyt1	chr10:127947305-127962915	0.532447	1.45891	1.45418	0.0015379	0.00958543	yes
XLOC_002701	Zc3h10	chr10:127980001-127984933	2.83342	2.45458	-0.207067	0.584962	0.745697	no
XLOC_002702	Rpl41	chr10:127985165-127986224	5153.52	2857.57	-0.85077	8.75266e-06	0.000111171	yes
XLOC_002703	Pa2g4	chr10:127994821-128002990	326.953	197.35	-0.728324	0.000168025	0.00146924	yes
XLOC_002705	Rps26	chr10:128061584-128063562	1270.96	624.517	-1.02511	1.59767e-10	5.18322e-09	yes
XLOC_002706	Ikzf4	chr10:128067764-128083049	1.76512	1.55319	-0.184531	0.488584	0.668276	no
XLOC_002707	Suox	chr10:128106942-128110974	4.37474	3.03974	-0.525251	0.0535281	0.157699	no
XLOC_002708	Rab5b	chr10:128114237-128133324	11.8383	14.3575	0.278341	0.147586	0.311529	no
XLOC_002709	Cdk2	chr10:128134979-128142107	12.6706	11.4032	-0.152043	0.481472	0.662487	no
XLOC_002710	Dgka	chr10:128143313-128181112	1.09709	0.714723	-0.618226	0.415248	0.607625	no
XLOC_002711	Tmem198b	chr10:128227965-128241498	4.16307	3.70957	-0.166395	0.66581	0.805631	no
XLOC_002712	Ormdl2	chr10:128241720-128328774	14.0932	6.25244	-1.17251	0.000701192	0.00496725	yes
XLOC_002713	Gdf11	chr10:128241720-128328774	2.37378	3.58801	0.595998	0.432913	0.623131	no
XLOC_002715	Bloc1s1	chr10:128356969-128360580	42.1042	42.5743	0.0160195	0.943872	0.975079	no
XLOC_002749	Neurod4	chr10:129705207-129717296	0	1.14461	1.79769e+308	2.69516e-16	1.93214e-14	yes
XLOC_002754	-	chr10:129965011-129981269	1.68875	0.814083	-1.05271	0.00551598	0.0274069	yes
XLOC_002782	-	chr10:11021102-11027224	1.48127	1.78718	0.270846	0.287737	0.481098	no
XLOC_002787	-	chr10:14287015-14287113	2407.47	520.897	-2.20845	0.006441	0.0309456	yes
XLOC_002794	-	chr10:18054428-18054892	1.05042	0.132596	-2.98586	0.0616936	0.174068	no
XLOC_002804	-	chr10:18081081-18082036	1.24144	0.900956	-0.462488	0.465127	0.648734	no
XLOC_002814	-	chr10:23498794-23500037	0.629695	1.03216	0.712945	0.289593	0.482962	no
XLOC_002818	-	chr10:28863249-28950585	1.83192	2.58849	0.498757	0.114149	0.263881	no
XLOC_002838	-	chr10:32610344-32611594	0.888564	2.17086	1.28872	0.022277	0.0821731	no
XLOC_002840	-	chr10:35428455-35428630	34.7628	11.7815	-1.56102	0.0626392	0.175958	no
XLOC_002842	-	chr10:36859153-36860139	0.531979	7.96716	3.90462	7.61877e-08	1.55802e-06	yes
XLOC_002850	-	chr10:41772350-41772829	36.7152	28.4931	-0.365762	0.139981	0.301121	no
XLOC_002851	-	chr10:41773576-41773798	17.0231	15.0043	-0.182117	0.771672	0.875189	no
XLOC_002852	-	chr10:41773975-41774295	17.2334	15.0271	-0.197644	0.633552	0.781588	no
XLOC_002853	-	chr10:42303600-42422268	0.449912	1.22341	1.44319	0.574688	0.737718	no
XLOC_002863	-	chr10:45194445-45195445	2.66477	1.46931	-0.858871	0.0646556	0.180113	no
XLOC_002864	-	chr10:45196234-45197388	1.98148	1.05589	-0.908121	0.0653771	0.181255	no
XLOC_002865	-	chr10:45197634-45201794	1.35753	0.710066	-0.934959	0.0047557	0.024242	yes
XLOC_002866	-	chr10:45201948-45205473	2.15779	1.90138	-0.18251	0.516608	0.691496	no
XLOC_002868	-	chr10:45595823-45595886	8363.45	11461.3	0.454602	0.675412	0.812268	no
XLOC_002880	-	chr10:61246771-61247559	1.59907	2.35268	0.557065	0.336521	0.531333	no
XLOC_002885	-	chr10:66471936-66719117	0.870895	1.15832	0.411465	0.851622	0.923899	no
XLOC_002886	-	chr10:66471936-66719117	1.13327	2.28639	1.01258	0.42825	0.619306	no
XLOC_002891	-	chr10:66471936-66719117	1.12374	0.125633	-3.16103	0.767438	0.872352	no
XLOC_002898	-	chr10:67510353-67511526	1.03622	0.638375	-0.698852	0.266079	0.45817	no
XLOC_002901	-	chr10:74325583-74325653	5062.87	3518.03	-0.525186	0.647667	0.792301	no
XLOC_002902	-	chr10:74326193-74326257	33006.8	16983.6	-0.95862	0.172365	0.343743	no
XLOC_002910	-	chr10:79603728-79604276	1.7882	1.00408	-0.832627	0.278573	0.471914	no
XLOC_002917	-	chr10:81471471-81472516	1.14925	0.943843	-0.28407	0.642172	0.78838	no
XLOC_002928	-	chr10:82844359-82848759	1.16774	0.712753	-0.712249	0.0329094	0.109972	no
XLOC_002949	-	chr10:90643293-90644455	1.87394	1.58877	-0.238161	0.61241	0.766303	no
XLOC_002951	-	chr10:91535677-91537053	4.51236	3.80337	-0.246607	0.426783	0.618046	no
XLOC_002952	-	chr10:91537381-91627976	4.03113	1.39088	-1.53519	0.170837	0.341728	no
XLOC_002959	-	chr10:93090731-93091401	0.792387	3.07579	1.95668	0.0127055	0.0530639	no
XLOC_002978	-	chr10:109653775-109654153	0.661857	1.35908	1.03804	0.392763	0.586556	no
XLOC_002985	-	chr10:110942101-110942994	1.47712	0.217887	-2.76114	0.00139897	0.00886677	yes
XLOC_002991	-	chr10:116019311-116020730	1.83624	1.37209	-0.420375	0.337393	0.532314	no
XLOC_002992	-	chr10:116409766-116409838	37134.5	23888.3	-0.636459	0.158449	0.325731	no
XLOC_003001	-	chr10:118876864-118877963	1.08244	0.505487	-1.09855	0.100769	0.243203	no
XLOC_003002	-	chr10:118878435-118878909	1.2512	0.209681	-2.57705	0.0564539	0.163551	no
XLOC_003013	-	chr10:122542069-122543735	2.22108	0.708052	-1.64934	0.000144436	0.00129008	yes
XLOC_003014	-	chr10:122544132-122546801	1.68483	0.687456	-1.29326	0.000611108	0.00442908	yes
XLOC_003019	-	chr10:126820888-126821538	0.504263	1.03592	1.03867	0.309077	0.503031	no
XLOC_003031	-	chr10:129982019-129984562	1.05484	0.346469	-1.60623	0.000910495	0.00622643	yes
XLOC_003032	Pisd-ps1	chr11:3024023-3094234	2.09845	1.74822	-0.263441	0.512724	0.688512	no
XLOC_003033	Eif4enif1	chr11:3102355-3144591	27.1421	26.688	-0.0243408	0.886181	0.944022	no
XLOC_003034	Patz1	chr11:3189133-3221140	31.3117	29.0318	-0.109067	0.624932	0.77483	no
XLOC_003035	Pik3ip1	chr11:3230733-3242974	1.56291	1.15563	-0.435557	0.361732	0.556988	no
XLOC_003036	8430429K09Rik	chr11:3352415-3379834	1.99044	2.40642	0.2738	0.531271	0.703765	no
XLOC_003038	Selm	chr11:3414704-3417354	5.57561	4.03672	-0.465947	0.262061	0.453741	no
XLOC_003039	Morc2a	chr11:3549300-3590668	17.027	16.6604	-0.0314024	0.851151	0.923733	no
XLOC_003040	Dusp18	chr11:3785478-3801304	6.77244	9.05169	0.418511	0.0195398	0.0740441	no
XLOC_003041	Pes1	chr11:3863889-3880732	13.593	9.04628	-0.587471	0.00354823	0.0191105	yes
XLOC_003045	Rnf215	chr11:4035162-4060296	1.36604	2.74358	1.00606	0.0494717	0.148609	no
XLOC_003047	Sf3a1	chr11:4060356-4082544	26.1423	22.0775	-0.243809	0.125534	0.280805	no
XLOC_003048	Tbc1d10a	chr11:4086835-4115508	1.54592	1.36219	-0.182541	0.734442	0.851645	no
XLOC_003049	Gatsl3	chr11:4118253-4122412	1.47961	0.213001	-2.79629	0.000159553	0.00141063	yes
XLOC_003052	Ascc2	chr11:4537741-4586793	6.56504	5.33526	-0.299245	0.23069	0.41658	no
XLOC_003053	Zmat5	chr11:4604680-4637669	6.64529	5.58907	-0.249723	0.512905	0.688659	no
XLOC_003054	Nipsnap1	chr11:4774005-4794203	19.0708	12.9179	-0.56199	0.00298799	0.0166436	yes
XLOC_003055	Thoc5	chr11:4795345-4828868	20.0023	13.3261	-0.585904	0.00143405	0.00905914	yes
XLOC_003056	Ap1b1	chr11:4838758-4942797	9.99025	6.30753	-0.663447	0.000777792	0.0054454	yes
XLOC_003058	Rhbdd3	chr11:4999440-5006094	2.47331	1.38783	-0.833612	0.0421754	0.132189	no
XLOC_003059	Xbp1	chr11:5420969-5425875	26.922	15.5711	-0.789917	1.60413e-05	0.000190831	yes
XLOC_003061	2210015D19Rik	chr11:5612081-5684713	2.03421	3.37563	0.730689	0.0797288	0.208198	no
XLOC_003062	Dbnl	chr11:5688485-5704807	18.9672	25.1454	0.406785	0.0381516	0.122962	no
XLOC_003064	Ykt6	chr11:5855760-5867783	19.5801	17.3642	-0.173272	0.329781	0.524106	no
XLOC_003065	Ogdh	chr11:5997098-6355740	16.111	18.5939	0.206787	0.847759	0.921647	no
XLOC_003066	Zmiz2	chr11:5997098-6355740	10.4646	18.0114	0.783399	0.763614	0.870901	no
XLOC_003067	Ppia	chr11:5997098-6355740	3135.8	1498.76	-1.06506	2.92228e-05	0.000324075	yes
XLOC_003068	Ccm2	chr11:6446889-6496764	12.7311	11.1148	-0.195876	0.441802	0.630115	no
XLOC_003069	Ramp3	chr11:6550150-6577478	2.74135	0.573536	-2.25693	5.19469e-05	0.000536598	yes
XLOC_003085	Cnrip1	chr11:16951936-16979375	4.03408	2.08621	-0.951353	0.00620719	0.030079	yes
XLOC_003086	Ppp3r1	chr11:17059300-17100383	27.6439	20.7371	-0.414743	0.0144286	0.058551	no
XLOC_003087	Wdr92	chr11:17111895-17135203	4.68808	2.68811	-0.802408	0.000767254	0.00538636	yes
XLOC_003088	C1d	chr11:17157620-17169179	9.38329	5.3884	-0.800238	1.35484e-05	0.000164445	yes
XLOC_003090	Spred2	chr11:19824095-19924032	13.6557	11.1699	-0.289888	0.0950887	0.234521	no
XLOC_003091	Rab1	chr11:20101604-20126859	94.6154	81.9542	-0.207257	0.196461	0.373543	no
XLOC_003092	Sertad2	chr11:20443255-20553026	3.60573	3.76601	0.0627467	0.754688	0.864481	no
XLOC_003093	Peli1	chr11:20991326-21050330	20.5246	23.3139	0.183836	0.252769	0.44197	no
XLOC_003094	Vps54	chr11:21138891-21271206	18.5697	17.4564	-0.0891986	0.644668	0.790189	no
XLOC_003095	Wdpcp	chr11:21472283-21798689	1.63344	3.75351	1.20033	0.000177177	0.00152653	yes
XLOC_003096	Tmem17	chr11:22412285-22419234	2.258	3.06032	0.438639	0.262168	0.453803	no
XLOC_003097	Zrsr1	chr11:22799727-22882284	1.47301	1.21282	-0.280402	0.454162	0.640228	no
XLOC_003098	Cct4	chr11:22890592-22906824	212.42	117.4	-0.855485	2.01894e-06	3.02857e-05	yes
XLOC_003100	Xpo1	chr11:23156040-23197597	74.408	62.3199	-0.255765	0.164584	0.33406	no
XLOC_003101	Usp34	chr11:23206885-23397946	16.7174	17.288	0.0484153	0.791518	0.887236	no
XLOC_003102	Pus10	chr11:23546478-23632876	19.7255	13.9423	-0.500594	0.00947367	0.0424177	yes
XLOC_003103	Bcl11a	chr11:23978055-24073558	0.0482109	17.7666	8.52559	2.19508e-08	4.99597e-07	yes
XLOC_003106	Fancl	chr11:26287083-26493920	8.10524	7.68419	-0.0769628	0.756809	0.866393	no
XLOC_003107	Gm12070	chr11:26685107-26687859	351.884	223.216	-0.656659	8.64164e-05	0.000829537	yes
XLOC_003112	Efemp1	chr11:28753204-28826743	1.68856	0.307047	-2.45926	3.72204e-07	6.69583e-06	yes
XLOC_003113	Pnpt1	chr11:29030682-29062971	19.0111	9.61869	-0.982927	5.47281e-08	1.16265e-06	yes
XLOC_003114	Smek2	chr11:29072906-29120797	20.9156	29.0535	0.474135	0.00287299	0.0161314	yes
XLOC_003115	Ccdc88a	chr11:29273735-29410811	15.3189	34.3773	1.16614	3.25873e-11	1.16155e-09	yes
XLOC_003116	Mtif2	chr11:29426456-29445828	8.06334	9.69791	0.266297	0.191353	0.367457	no
XLOC_003118	Rtn4	chr11:29592897-29926033	46.331	65.3194	0.495535	0.00423573	0.0221157	yes
XLOC_003119	Psme4	chr11:30671774-30780495	44.8226	45.8123	0.0315086	0.8575	0.927154	no
XLOC_003121	Asb3	chr11:30854397-31003858	4.14804	3.55448	-0.22279	0.339925	0.535207	no
XLOC_003122	Cpeb4	chr11:31770883-31835840	2.52777	4.35232	0.783922	0.0176979	0.0685325	no
XLOC_003124	Nsg2	chr11:31900458-31959202	1.31692	8.37082	2.6682	4.9738e-13	2.36237e-11	yes
XLOC_003125	Snrnp25	chr11:32105414-32108995	18.9893	10.7136	-0.82574	0.00170229	0.0104001	yes
XLOC_003126	Mpg	chr11:32126504-32167614	6.55989	5.08577	-0.367204	0.243388	0.431534	no
XLOC_003127	Hba-x	chr11:32176599-32178115	28.9854	585.234	4.33561	0	0	yes
XLOC_003128	Hba-a1,Hba-a2	chr11:32183671-32184493	4.44182	56.677	3.67354	3.36797e-12	1.3984e-10	yes
XLOC_003130	Hba-a1,Hba-a2	chr11:32196488-32197310	1.95565	28.546	3.86757	7.94595e-10	2.29402e-08	yes
XLOC_003132	Sh3pxd2b	chr11:32247810-32330181	5.89374	7.60082	0.366971	0.0471769	0.143412	no
XLOC_003133	Ubtd2	chr11:32355371-32418709	25.1669	21.7801	-0.208519	0.214318	0.395857	no
XLOC_003134	Stk10	chr11:32433265-32524677	3.02814	1.61387	-0.907907	0.00227017	0.0132359	yes
XLOC_003135	Fbxw11	chr11:32542874-32646814	21.7535	16.468	-0.401577	0.0135864	0.0559141	no
XLOC_003139	Slit3	chr11:34934957-35522694	2.58513	1.24237	-1.05714	0.000998541	0.00669929	yes
XLOC_003141	Pank3	chr11:35582996-35604787	8.54758	16.164	0.919201	1.33339e-08	3.15871e-07	yes
XLOC_003143	Nudcd2	chr11:40547143-40553549	26.8985	19.9207	-0.433261	0.0140227	0.0572179	no
XLOC_003144	Gabrb2	chr11:42233258-42446160	0.525342	1.59576	1.60292	9.55694e-07	1.55685e-05	yes
XLOC_003146	Slu7	chr11:43247232-43261483	10.2521	8.22331	-0.318133	0.0941597	0.23346	no
XLOC_003148	Ccnjl	chr11:43342264-43403885	5.61876	5.16167	-0.122415	0.62653	0.776339	no
XLOC_003149	Pwwp2a	chr11:43495499-43536479	15.4351	13.0332	-0.24403	0.200174	0.378299	no
XLOC_003151	Rnf145	chr11:44332465-44379309	38.8614	26.1178	-0.573303	0.000377441	0.00295002	yes
XLOC_003152	Ebf1	chr11:44431624-44820596	1.30269	1.18308	-0.138955	0.763188	0.870882	no
XLOC_003154	Clint1	chr11:45665465-45724127	51.5565	41.043	-0.32902	0.0368533	0.119805	no
XLOC_003156	Adam19	chr11:45869488-45960844	0.737351	2.25888	1.61518	1.73704e-07	3.35168e-06	yes
XLOC_003159	Med7	chr11:46250448-46258293	10.5158	11.2625	0.0989764	0.605767	0.761675	no
XLOC_003166	Gnb2l1	chr11:48613861-48619743	655.893	314.953	-1.05832	5.22099e-10	1.56148e-08	yes
XLOC_003167	Snord96a	chr11:48613861-48619743	125.341	198.494	0.66324	0.983571	0.992123	no
XLOC_003168	Snord95	chr11:48613861-48619743	433.764	385.538	-0.170039	0.995044	0.997624	no
XLOC_003173	Zfp62	chr11:49017001-49036264	9.42817	12.3165	0.385547	0.0333129	0.110998	no
XLOC_003174	Mgat1	chr11:49057692-49076532	3.00966	3.01583	0.00295384	0.993009	0.996549	no
XLOC_003192	Gfpt2	chr11:49607656-49652122	2.0067	1.27622	-0.652947	0.0661284	0.182704	no
XLOC_003193	Mapk9	chr11:49660252-49699923	5.76071	6.87782	0.255703	0.182233	0.356146	no
XLOC_003195	Rnf130	chr11:49838832-49939738	22.8563	23.1775	0.02013	0.927763	0.966491	no
XLOC_003197	Tbc1d9b	chr11:49944861-49986287	3.93324	4.40522	0.163496	0.434599	0.624524	no
XLOC_003198	3010026O09Rik	chr11:49988352-50013617	7.03747	7.73454	0.136258	0.646239	0.791406	no
XLOC_003199	Mgat4b	chr11:50038836-50048605	2.41632	2.21199	-0.127466	0.709613	0.83506	no
XLOC_003200	Hnrnph1	chr11:50191220-50200030	377.188	486.722	0.367814	0.059715	0.170242	no
XLOC_003207	Zfp354a	chr11:50872758-50886613	0.994141	1.47018	0.56447	0.103411	0.24693	no
XLOC_003209	Clk4	chr11:51076671-51096883	16.9878	21.0257	0.307651	0.114693	0.264752	no
XLOC_003211	Agxt2l2	chr11:51398258-51420383	1.71546	2.21074	0.365933	0.909259	0.957042	no
XLOC_003212	Nhp2	chr11:51433274-51449398	60.984	20.4582	-1.57575	1.68754e-14	9.61345e-13	yes
XLOC_003214	Sar1b	chr11:51577164-51605455	41.055	36.1207	-0.184729	0.286084	0.479495	no
XLOC_003215	Cdkn2aipnl	chr11:51781132-51790838	20.4049	13.286	-0.619009	0.000925737	0.00630907	yes
XLOC_003216	Cdkl3	chr11:51817722-51898169	2.93237	3.8388	0.38859	0.273795	0.467024	no
XLOC_003217	Ppp2ca	chr11:51912325-51936251	129.85	79.1293	-0.714566	6.78701e-06	8.82541e-05	yes
XLOC_003218	Mir3061	chr11:51939987-51941505	3.57195	4.4431	0.314854	0.302399	0.496381	no
XLOC_003219	Skp1a	chr11:52045496-52060360	137.596	86.3357	-0.672408	2.20967e-05	0.000254025	yes
XLOC_003220	Vdac1	chr11:52174616-52202898	73.332	53.0867	-0.466091	0.00351055	0.018971	yes
XLOC_003221	9530068E07Rik	chr11:52209929-52222233	34.0169	30.1165	-0.175697	0.275836	0.469105	no
XLOC_003223	Zcchc10	chr11:53138190-53146803	13.2306	4.67022	-1.50232	1.00604e-10	3.36655e-09	yes
XLOC_003224	Aff4	chr11:53164268-53235332	14.3626	15.5507	0.114663	0.468703	0.651048	no
XLOC_003227	Sept8	chr11:53333237-53357599	7.73913	8.88621	0.199395	0.31892	0.513088	no
XLOC_003228	Kif3a	chr11:53380880-53417746	5.82357	10.2749	0.819146	2.62151e-06	3.82166e-05	yes
XLOC_003231	P4ha2	chr11:53914425-53945169	2.87853	0.718971	-2.00133	6.12604e-05	0.000617475	yes
XLOC_003232	Acsl6	chr11:54117325-54178255	2.01576	6.68421	1.72943	3.56194e-07	6.43198e-06	yes
XLOC_003234	Fnip1	chr11:54251680-54331743	2.22893	2.87583	0.367627	0.0664913	0.18352	no
XLOC_003235	Rapgef6	chr11:54336346-54512833	6.91801	8.05475	0.219483	0.202487	0.380952	no
XLOC_003237	Hint1	chr11:54679939-54683998	143.652	131.812	-0.124103	0.464374	0.648281	no
XLOC_003238	Gpx3	chr11:54716354-54723889	12.0826	7.5082	-0.686389	0.0087052	0.0397771	yes
XLOC_003240	Slc36a1	chr11:55017841-55049832	1.82258	2.38762	0.38959	0.134624	0.293355	no
XLOC_003241	G3bp1	chr11:55283141-55318919	97.2953	54.232	-0.843226	1.77475e-05	0.000208793	yes
XLOC_003242	Gm12238	chr11:55283141-55318919	0	18.2161	1.79769e+308	0.422905	0.614594	no
XLOC_003244	Mfap3	chr11:57332166-57347319	17.1654	12.5044	-0.457068	0.00814053	0.0377104	yes
XLOC_003245	Galnt10	chr11:57458943-57601003	3.11743	2.03701	-0.613905	0.0480566	0.145306	no
XLOC_003246	Sap30l	chr11:57615138-57625993	3.81731	3.05395	-0.321879	0.390111	0.584052	no
XLOC_003247	Larp1	chr11:57822565-57875534	46.2278	25.4908	-0.858786	6.31984e-08	1.31917e-06	yes
XLOC_003248	Cnot8	chr11:57917654-57932096	12.4711	9.21834	-0.436007	0.0315705	0.106709	no
XLOC_003249	Mrpl22	chr11:57985155-57993082	20.9013	11.9264	-0.809435	0.00273033	0.0154848	yes
XLOC_003253	Zfp692	chr11:58120570-58143841	3.80192	4.96804	0.385948	0.278447	0.471868	no
XLOC_003254	Sh3bp5l	chr11:58144219-58161230	3.28142	3.54384	0.110996	0.693277	0.823981	no
XLOC_003270	2810021J22Rik	chr11:58680741-58697840	2.74715	2.80706	0.031126	0.889256	0.945581	no
XLOC_003272	Hist3h2ba	chr11:58762398-58768014	22.4627	37.7799	0.750085	0.187607	0.362799	no
XLOC_003273	Hist3h2a	chr11:58768158-58771368	2.95636	2.91424	-0.0206998	0.950246	0.978358	no
XLOC_003275	Trim11	chr11:58791617-58806780	3.97385	3.30476	-0.265991	0.465724	0.648952	no
XLOC_003276	Mrpl55	chr11:59015986-59020435	10.8832	7.25302	-0.585452	0.0996943	0.241611	no
XLOC_003277	2310033P09Rik	chr11:59021862-59024236	10.0787	9.18527	-0.133916	0.609847	0.764885	no
XLOC_003278	Wnt9a	chr11:59120431-59147054	0.240546	2.2159	3.20351	3.3067e-07	6.03945e-06	yes
XLOC_003279	Jmjd4	chr11:59263546-59285976	3.92081	4.33312	0.144251	0.521717	0.695465	no
XLOC_003283	Mprip	chr11:59475996-59594362	8.00554	9.6061	0.262952	0.13797	0.298001	no
XLOC_003285	Nt5m	chr11:59623581-59690035	6.49266	7.50324	0.208706	0.751881	0.862453	no
XLOC_003286	Med9	chr11:59761715-59778444	5.63226	3.98059	-0.500732	0.0319493	0.107761	no
XLOC_003287	Rai1	chr11:59918514-60034106	4.6919	6.90736	0.557961	0.00788607	0.0367447	yes
XLOC_003289	4933439F18Rik	chr11:60230646-60258779	19.8524	17.9071	-0.148779	0.358213	0.553305	no
XLOC_003290	Drg2	chr11:60268118-60282207	17.6623	12.3616	-0.514812	0.0116938	0.0498399	yes
XLOC_003292	Alkbh5	chr11:60351184-60372370	16.6109	16.2095	-0.035294	0.841735	0.917938	no
XLOC_003293	Llgl1	chr11:60513191-60540723	19.7978	18.3748	-0.107605	0.591646	0.750278	no
XLOC_003294	Smcr7	chr11:60541899-60546453	1.43136	1.20774	-0.24507	0.549967	0.718512	no
XLOC_003296	Smcr8	chr11:60553079-60624767	10.0161	7.71006	-0.377502	0.0990652	0.240635	no
XLOC_003297	Dhrs7b	chr11:60644132-60672842	5.56416	4.43132	-0.328427	0.310711	0.504866	no
XLOC_003298	Map2k3	chr11:60745558-60766305	7.53049	5.50863	-0.45105	0.0606563	0.172156	no
XLOC_003299	Kcnj12	chr11:60879305-60884633	1.10968	0.0675101	-4.03889	1.64131e-05	0.00019489	yes
XLOC_003302	Mfap4	chr11:61298629-61302243	1.85195	9.54001	2.36494	2.24862e-07	4.26076e-06	yes
XLOC_003303	B9d1	chr11:61318673-61326429	21.3332	18.6655	-0.192726	0.43389	0.623926	no
XLOC_003306	Specc1	chr11:61890573-62036515	3.03046	10.7737	1.82991	8.43769e-15	5.01571e-13	yes
XLOC_003308	Ttc19	chr11:62094974-62327402	7.63482	7.62549	-0.00176327	0.996587	0.9981	no
XLOC_003309	Pigl	chr11:62094974-62327402	12.999	11.2844	-0.204061	0.76374	0.870939	no
XLOC_003310	Ubb	chr11:62365005-62366714	345.916	219.931	-0.653369	4.04009e-05	0.000429619	yes
XLOC_003312	2410006H16Rik	chr11:62416378-62462025	66.1667	36.1625	-0.87161	0.00114814	0.00751847	yes
XLOC_003315	Snord65	chr11:62416378-62462025	0	1489.12	1.79769e+308	0.375	0.569222	no
XLOC_003316	Mmgt2	chr11:62462165-62479882	3.21574	3.47176	0.110517	0.757944	0.867354	no
XLOC_003319	Fam18b	chr11:62692991-62708686	12.6438	6.688	-0.918788	9.19793e-06	0.000116286	yes
XLOC_003322	Pmp22	chr11:62945011-62973048	3.813	1.04389	-1.86896	1.23805e-07	2.46593e-06	yes
XLOC_003323	2810001G20Rik	chr11:63892985-63896761	10.1451	8.48486	-0.257816	0.359969	0.55539	no
XLOC_003325	Elac2	chr11:64792536-64976463	10.046	6.77637	-0.568039	0.0138671	0.0567888	no
XLOC_003326	Zkscan6	chr11:65620721-65643122	1.98755	1.78165	-0.157779	0.690343	0.821553	no
XLOC_003329	Sco1	chr11:66866171-66880947	3.41944	3.04053	-0.169439	0.48427	0.664998	no
XLOC_003339	Stx8	chr11:67779984-68020650	3.38999	2.41936	-0.486658	0.0477653	0.144687	no
XLOC_003344	Myh10	chr11:68505416-68630126	37.7538	45.9029	0.281963	0.0826645	0.213823	no
XLOC_003346	Rpl26	chr11:68715067-68718036	875.913	359.459	-1.28496	2.22045e-15	1.39349e-13	yes
XLOC_003348	1500010J02Rik	chr11:68829412-68849975	8.36509	9.53637	0.18906	0.389848	0.583842	no
XLOC_003349	Aurkb	chr11:68859144-68865164	52.0087	52.163	0.00427435	0.979742	0.990792	no
XLOC_003350	2310047M10Rik	chr11:68873276-68875078	1.08356	1.05658	-0.0363818	0.947195	0.976898	no
XLOC_003351	Tmem107	chr11:68884310-68887573	6.79079	4.71142	-0.527418	0.104597	0.249109	no
XLOC_003352	Vamp2	chr11:68902009-68905966	4.42452	6.5504	0.566063	0.0504791	0.150972	no
XLOC_003353	Per1	chr11:68908775-68923459	2.6718	2.20855	-0.274711	0.347888	0.54292	no
XLOC_003357	Trappc1	chr11:69137487-69139295	65.6151	71.8385	0.13073	0.465844	0.648952	no
XLOC_003359	A030009H04Rik	chr11:69154270-69156149	5.51638	5.24248	-0.0734731	0.768216	0.872746	no
XLOC_003360	Lsmd1	chr11:69204378-69211736	29.9995	17.8081	-0.752407	0.146793	0.310368	no
XLOC_003361	Trp53	chr11:69393860-69405375	118.894	83.0895	-0.516936	0.00211533	0.012443	yes
XLOC_003362	Sat2	chr11:69435591-69438087	1.27907	1.231	-0.0552727	0.956943	0.980978	no
XLOC_003363	Fxr2	chr11:69446472-69467658	4.94224	3.55199	-0.476537	0.0976249	0.238316	no
XLOC_003368	1810027O10Rik	chr11:69652026-69653060	13.4354	8.52931	-0.655539	0.11601	0.266444	no
XLOC_003369	Plscr3	chr11:69659873-69672232	1.12531	1.18553	0.0752117	0.88042	0.940444	no
XLOC_003370	Neurl4	chr11:69715379-69727324	5.17182	5.44538	0.0743624	0.714822	0.838742	no
XLOC_003371	Gps2	chr11:69727693-69730093	12.0746	14.3181	0.245866	0.30455	0.498545	no
XLOC_003372	Ybx2	chr11:69749400-69755386	1.31862	2.11789	0.683598	0.402165	0.595762	no
XLOC_003374	Ctdnep1	chr11:69781726-69804102	22.0669	18.9295	-0.22125	0.392174	0.586088	no
XLOC_003375	Gabarap	chr11:69804871-69808451	29.1581	32.0858	0.138039	0.474425	0.656614	no
XLOC_003376	Phf23	chr11:69809174-69813513	17.5107	12.2115	-0.51999	0.0178447	0.0689615	no
XLOC_003377	Dvl2	chr11:69814087-69823611	6.26214	4.87225	-0.362069	0.182797	0.356681	no
XLOC_003379	Dlg4	chr11:69832106-69859033	5.99763	5.88758	-0.0267173	0.924987	0.964965	no
XLOC_003382	Mgl2	chr11:69943858-69951044	1.7264	0.671684	-1.36191	0.0055244	0.0274158	yes
XLOC_003387	Arrb2	chr11:70246154-70254993	10.3167	7.63334	-0.43459	0.0874389	0.221942	no
XLOC_003388	Med11	chr11:70265432-70279701	12.144	5.30739	-1.19416	0.000151823	0.00134727	yes
XLOC_003392	Psmb6	chr11:70338858-70341360	114.569	86.7755	-0.400862	0.0139578	0.0570743	no
XLOC_003394	Mink1	chr11:70376368-70428142	2.99013	2.22968	-0.423374	0.156508	0.323233	no
XLOC_003397	Rnf167	chr11:70457528-70465281	7.39171	5.85956	-0.335117	0.389414	0.583442	no
XLOC_003398	Eno3	chr11:70470714-70476015	15.0116	7.44894	-1.01097	0.000224383	0.00187961	yes
XLOC_003399	Kif1c	chr11:70514049-70545633	3.68743	3.29213	-0.163594	0.443749	0.632034	no
XLOC_003400	Zfp3	chr11:70577897-70589701	1.59454	1.81889	0.189923	0.675995	0.812612	no
XLOC_003401	Rabep1	chr11:70658264-70783481	10.8298	12.6627	0.225575	0.356983	0.552074	no
XLOC_003402	Rpain	chr11:70783701-70796528	6.26524	5.67707	-0.142223	0.878798	0.939889	no
XLOC_003403	Mis12	chr11:70833112-70847119	21.5547	22.5044	0.0622026	0.766993	0.872104	no
XLOC_003404	Wscd1	chr11:71564204-71607025	10.9618	9.14757	-0.261019	0.234595	0.421223	no
XLOC_003405	Fam64a	chr11:71856003-71860872	21.4086	17.9966	-0.250464	0.21355	0.395163	no
XLOC_003406	Txndc17	chr11:72020818-72023989	25.9073	13.4443	-0.946366	4.68824e-07	8.18774e-06	yes
XLOC_003409	Xaf1	chr11:72115130-72127235	1.74336	1.28803	-0.436707	0.202766	0.381252	no
XLOC_003412	Mybbp1a	chr11:72254879-72265052	71.273	42.0252	-0.762099	1.81433e-06	2.75839e-05	yes
XLOC_003413	Ube2g1	chr11:72420762-72499983	24.3969	26.5007	0.119333	0.452677	0.639205	no
XLOC_003414	Ankfy1	chr11:72503503-72585648	9.38844	9.27572	-0.0174265	0.914518	0.959692	no
XLOC_003415	Zzef1	chr11:72609727-72740622	1.54146	2.50847	0.702516	0.00316715	0.01746	yes
XLOC_003419	1200014J11Rik	chr11:72861368-72902770	7.79623	6.15397	-0.341259	0.0700748	0.190013	no
XLOC_003422	Tax1bp3	chr11:72990584-72995548	6.58349	7.60334	0.207781	0.454055	0.640179	no
XLOC_003442	1300001I01Rik	chr11:74462996-74484349	8.08013	8.70669	0.107745	0.550381	0.718923	no
XLOC_003443	Mettl16	chr11:74584337-74640103	26.7541	16.1898	-0.724679	0.000333725	0.00264864	yes
XLOC_003444	Mnt	chr11:74644425-74659227	3.93048	4.32602	0.138335	0.586958	0.747055	no
XLOC_003445	Tsr1	chr11:74711581-74739300	13.7002	8.1275	-0.753316	0.000562494	0.00412044	yes
XLOC_003446	Snord91a	chr11:74711581-74739300	0	1219.55	1.79769e+308	0.426808	0.618046	no
XLOC_003447	Smg6	chr11:74739373-74977950	7.39734	6.70631	-0.141486	0.432589	0.622923	no
XLOC_003450	Rtn4rl1	chr11:75007494-75081264	1.54875	0.345887	-2.16273	7.85674e-07	1.30884e-05	yes
XLOC_003451	Smyd4	chr11:75161934-75219207	1.64901	2.4161	0.551077	0.178838	0.352411	no
XLOC_003453	Tlcd2	chr11:75281580-75284387	4.35271	3.91118	-0.15431	0.704475	0.831854	no
XLOC_003454	Prpf8	chr11:75300278-75322949	92.3344	83.7724	-0.140393	0.424413	0.615805	no
XLOC_003459	Pitpna	chr11:75401609-75442280	18.1555	21.125	0.218544	0.188033	0.363346	no
XLOC_003460	Inpp5k	chr11:75444395-75462367	1.79594	2.43743	0.440619	0.370999	0.56548	no
XLOC_003461	Myo1c	chr11:75465010-75488136	1.761	0.839819	-1.06824	0.000345606	0.002732	yes
XLOC_003462	Crk	chr11:75492811-75520396	42.3407	38.6857	-0.130245	0.435252	0.624853	no
XLOC_003463	Ywhae	chr11:75546388-75579343	792.411	747.202	-0.0847516	0.703433	0.831257	no
XLOC_003465	Fam57a	chr11:76015528-76031074	7.85045	10.5094	0.420834	0.320383	0.514598	no
XLOC_003467	Rnmtl1	chr11:76057237-76064306	3.63722	2.13816	-0.766465	0.0623634	0.175344	no
XLOC_003468	Timm22	chr11:76220668-76229814	6.1369	5.54788	-0.145576	0.532984	0.705231	no
XLOC_003472	Blmh	chr11:76759157-76800891	66.1813	51.3001	-0.367461	0.0199705	0.0753359	no
XLOC_003474	Ssh2	chr11:77029771-77273721	4.77441	7.13552	0.579695	0.00101756	0.00681493	yes
XLOC_003476	Git1	chr11:77306913-77321307	17.7635	16.1916	-0.133671	0.455599	0.641316	no
XLOC_003478	Nufip2	chr11:77499640-77531468	16.6592	11.9632	-0.477714	0.00261631	0.0149238	yes
XLOC_003479	Myo18a	chr11:77590766-77679482	1.62544	3.60771	1.15025	6.31941e-05	0.000631315	yes
XLOC_003481	Phf12	chr11:77796317-77844037	19.5666	19.2598	-0.0227952	0.889756	0.945842	no
XLOC_003482	Dhrs13	chr11:77845814-77851366	2.06076	1.29215	-0.673404	0.114786	0.264857	no
XLOC_003483	Flot2	chr11:77851442-77873934	8.20735	6.23987	-0.395402	0.0919487	0.229704	no
XLOC_003486	BC017647	chr11:77908174-77979052	14.4273	15.4535	0.0991326	0.629822	0.778975	no
XLOC_003487	Tlcd1	chr11:77992267-77994274	4.41772	1.37177	-1.68726	2.63864e-05	0.000295877	yes
XLOC_003488	Rab34	chr11:78001928-78005695	14.5621	4.68678	-1.63555	6.902e-10	2.02005e-08	yes
XLOC_003490	Sdf2	chr11:78020250-78068998	11.8324	8.97068	-0.399457	0.498507	0.675981	no
XLOC_003491	2610507B11Rik	chr11:78075255-78104127	37.4979	26.4117	-0.505633	0.00149151	0.00935352	yes
XLOC_003492	Spag5	chr11:78115092-78135956	10.1631	13.7555	0.436663	0.0137123	0.0562992	no
XLOC_003493	Aldoc	chr11:78136596-78141146	1.47362	0.627202	-1.23236	0.055287	0.161209	no
XLOC_003494	Pigs	chr11:78141923-78156324	20.9467	16.1701	-0.373394	0.0449239	0.138135	no
XLOC_003495	Unc119	chr11:78157023-78162658	8.81185	6.21346	-0.504048	0.0792078	0.207063	no
XLOC_003497	Slc46a1	chr11:78279202-78285447	4.0887	2.3909	-0.774091	0.0252663	0.0904474	no
XLOC_003500	Poldip2	chr11:78325797-78336238	12.8628	13.3347	0.0519778	0.799406	0.892108	no
XLOC_003501	Ift20	chr11:78349781-78364237	39.1079	26.8903	-0.540374	0.0375909	0.121748	no
XLOC_003502	1810012P15Rik	chr11:78640096-78657401	1.08909	1.61332	0.566909	0.0690062	0.187914	no
XLOC_003505	Nf1	chr11:79153393-79395111	8.23334	10.1722	0.305078	0.061907	0.174419	no
XLOC_003506	Rab11fip4	chr11:79404713-79511523	5.51818	6.08789	0	1	1	no
XLOC_003509	Suz12	chr11:79806607-79847625	29.0293	41.3173	0.509234	0.00288435	0.0161667	yes
XLOC_003510	Atad5	chr11:79902901-79949521	17.3322	21.5232	0.312435	0.0545686	0.159736	no
XLOC_003513	Rhot1	chr11:80022556-80081409	9.69449	11.0812	0.192872	0.287797	0.481098	no
XLOC_003514	Rhbdl3	chr11:80114413-80169488	0.0866525	1.64794	4.24928	1.57842e-06	2.42671e-05	yes
XLOC_003515	Zfp207	chr11:80196422-80219375	155.43	137.881	-0.172844	0.37099	0.56548	no
XLOC_003516	Psmd11	chr11:80242105-80286399	55.932	54.4844	-0.037833	0.832547	0.911763	no
XLOC_003517	Cdk5r1	chr11:80290547-80294681	0.558624	2.18119	1.96517	1.38625e-06	2.16076e-05	yes
XLOC_003518	Tmem98	chr11:80623916-80635535	2.71754	22.7164	3.06336	0	0	yes
XLOC_003528	Zfp830	chr11:82577846-82581124	5.58412	4.44493	-0.329168	0.106951	0.252734	no
XLOC_003529	Lig3	chr11:82594636-82684712	13.7899	14.1088	0.0329768	0.855595	0.926192	no
XLOC_003532	Slfn5	chr11:82724754-82778352	1.25736	0.73151	-0.781451	0.00603128	0.0293902	yes
XLOC_003538	AA465934,AI450353	chr11:83105200-83112639	78.9782	7.35535	-3.42459	4.88498e-15	2.96836e-13	yes
XLOC_003539	Ap2b1	chr11:83116198-83218535	22.1246	21.8384	-0.0187862	0.91072	0.957913	no
XLOC_003540	Rasl10b	chr11:83223573-83234540	1.8436	0.72554	-1.3454	0.000214129	0.00180398	yes
XLOC_003542	Taf15	chr11:83286589-83320242	26.9902	27.9576	0.0508087	0.780807	0.880187	no
XLOC_003548	Heatr6	chr11:83567138-83597256	6.74112	7.75638	0.202395	0.257733	0.448152	no
XLOC_003550	Ddx52	chr11:83755591-83776588	21.7662	20.3141	-0.0996078	0.5413	0.711511	no
XLOC_003551	Synrg	chr11:83777929-83855581	7.43212	10.1897	0.455265	0.0233884	0.0853207	no
XLOC_003552	Acaca	chr11:83993356-84215234	11.8629	13.2345	0.157846	0.335867	0.530645	no
XLOC_003555	Myo19	chr11:84689814-84729858	4.06662	5.17236	0.346992	0.248843	0.437705	no
XLOC_003556	Car4	chr11:84771255-84779556	43.2886	0.0723501	-9.22478	0	0	yes
XLOC_003559	Ppm1d	chr11:85124755-85160573	9.39613	12.2936	0.387767	0.0378846	0.122391	no
XLOC_003560	Bcas3	chr11:85166665-85639560	2.02983	1.32365	-0.616839	0.0931282	0.231683	no
XLOC_003563	Rnft1	chr11:86298158-86312509	2.40737	1.79094	-0.426735	0.0657456	0.18201	no
XLOC_003564	Tubd1	chr11:86358464-86381476	1.085	1.90168	0.809585	0.129962	0.286551	no
XLOC_003565	Ptrh2	chr11:86497484-86505959	12.0067	8.73628	-0.458751	0.0119476	0.0506281	no
XLOC_003566	Fam33a	chr11:86922705-86938938	25.6217	26.8316	0.0665644	0.780014	0.879858	no
XLOC_003567	Trim37	chr11:86940557-87172496	22.0573	28.1935	0.354107	0.131352	0.288735	no
XLOC_003569	Sept4	chr11:87394632-87404041	1.49158	0.974876	-0.613547	0.214257	0.395819	no
XLOC_003570	Mtmr4	chr11:87405718-87430164	14.9255	14.8338	-0.00889222	0.958149	0.981422	no
XLOC_003574	Supt4h1	chr11:87551066-87557119	79.5889	35.3401	-1.17126	8.62417e-10	2.47861e-08	yes
XLOC_003578	Mks1	chr11:87666726-87677303	1.68765	1.37462	-0.295983	0.517546	0.692413	no
XLOC_003579	Srsf1	chr11:87861172-87867259	121.121	107.634	-0.170305	0.368425	0.563126	no
XLOC_003581	Vezf1	chr11:87881726-87898250	69.1632	77.0092	0	1	1	no
XLOC_003582	Cuedc1	chr11:87911395-88007642	4.24926	4.51944	0.0889296	0.768518	0.872905	no
XLOC_003583	Mrps23	chr11:88017919-88025009	17.531	10.5445	-0.733418	0.000809281	0.00563904	yes
XLOC_003585	Mir378b	chr11:88152750-88579581	1.25956	1.26113	0.00180484	0.999078	0.999479	no
XLOC_003586	C030037D09Rik	chr11:88579956-88589886	1.31985	2.93146	1.15125	0.0023231	0.0135033	yes
XLOC_003587	4930405P13Rik	chr11:88767241-88816756	1.15222	1.78184	0.628943	0.597756	0.754875	no
XLOC_003589	Coil	chr11:88835248-88852927	11.723	10.851	-0.111507	0.560204	0.726452	no
XLOC_003590	Trim25	chr11:88860716-88881607	9.16442	0.675782	-3.76141	0	0	yes
XLOC_003593	Mmd	chr11:90110789-90139891	12.2589	12.8573	0.0687603	0.740599	0.855353	no
XLOC_003594	Cox11	chr11:90499497-90549058	7.42927	4.33145	-0.778369	0.0056794	0.0280034	yes
XLOC_003596	Car10	chr11:92960603-93463065	2.03402	0.0864397	-4.5565	2.7838e-05	0.000310768	yes
XLOC_003597	Mbtd1	chr11:93747166-93808300	39.6966	34.7337	-0.192682	0.261217	0.45269	no
XLOC_003598	Spag9	chr11:93857404-93987396	9.73427	23.5204	1.27277	4.17888e-13	2.02501e-11	yes
XLOC_003599	Tob1	chr11:94072767-94076806	5.71849	9.28014	0.698513	0.00133448	0.00850873	yes
XLOC_003600	Ankrd40	chr11:94189314-94203161	7.59511	10.7516	0.501411	0.00944181	0.0423443	yes
XLOC_003602	Lrrc59	chr11:94491137-94515068	71.9506	59.5005	-0.274104	0.10635	0.251718	no
XLOC_003603	Mrpl27	chr11:94515104-94521401	30.7341	23.3598	-0.395812	0.0832968	0.214866	no
XLOC_003606	Ppp1r9b	chr11:94852525-94868212	3.51761	4.26907	0.279328	0.251885	0.44075	no
XLOC_003607	Samd14	chr11:94871192-94887401	3.49323	7.04517	1.01207	0.00028908	0.00234263	yes
XLOC_003611	Fam117a	chr11:95198331-95243186	6.32733	1.91176	-1.72669	2.6745e-09	7.09038e-08	yes
XLOC_003612	Slc35b1	chr11:95246235-95252966	22.2863	12.7978	-0.800266	0.000217417	0.00182766	yes
XLOC_003613	Spop	chr11:95275396-95354724	25.0351	26.5963	0.087271	0.594679	0.752877	no
XLOC_003614	Phb	chr11:95528270-95542087	78.4043	45.5737	-0.782731	1.3019e-06	2.04931e-05	yes
XLOC_003616	Zfp652	chr11:95610311-95633667	18.5484	18.3466	-0.0157821	0.946183	0.976389	no
XLOC_003619	4833417C18Rik	chr11:95720130-95722360	3.67222	2.31698	-0.664406	0.0523308	0.155081	no
XLOC_003621	Snf8	chr11:95896230-95908719	20.9529	13.3038	-0.65531	0.00573641	0.0282482	yes
XLOC_003637	Cbx1	chr11:96650437-96669954	143.636	93.7504	-0.615522	0.000709118	0.00501598	yes
XLOC_003638	Copz2	chr11:96711189-96722516	4.53241	3.94327	-0.200886	0.598977	0.756168	no
XLOC_003642	Sp6	chr11:96874882-96886730	3.05623	0.105807	-4.85225	1.33227e-14	7.70421e-13	yes
XLOC_003643	Scrn2	chr11:96891265-96895274	2.61546	1.69054	-0.629577	0.206721	0.386373	no
XLOC_003644	Mrpl10	chr11:96902899-96910527	16.9268	10.216	-0.728484	0.00044102	0.00335249	yes
XLOC_003645	Osbpl7	chr11:96912133-96930384	1.33216	1.09521	-0.282567	0.529565	0.702357	no
XLOC_003646	Mrpl45	chr11:97177029-97191234	10.3973	7.22109	-0.525917	0.0100912	0.0444853	yes
XLOC_003647	Socs7	chr11:97223864-97259858	3.86183	4.17319	0.111867	0.58854	0.74799	no
XLOC_003648	Arhgap23	chr11:97309494-97363867	1.25016	1.49301	0.256105	0.492371	0.670829	no
XLOC_003650	Mllt6	chr11:97524725-97546952	1.68118	5.16109	1.6182	1.71648e-06	2.62841e-05	yes
XLOC_003651	Cisd3	chr11:97547265-97549939	2.69728	1.08696	-1.31121	0.0310787	0.105437	no
XLOC_003652	Psmb3	chr11:97564747-97574814	151.121	83.0812	-0.86311	2.67122e-07	4.97856e-06	yes
XLOC_003653	Lasp1	chr11:97660985-97700078	14.219	13.8824	-0.0345631	0.846118	0.920725	no
XLOC_003654	B230217C12Rik	chr11:97702093-97705964	4.96783	4.442	-0.161407	0.641537	0.787764	no
XLOC_003655	Rpl19	chr11:97888023-97891807	1054.87	586.27	-0.84743	5.64005e-07	9.6562e-06	yes
XLOC_003656	Cdk12	chr11:98064104-98114854	21.3276	17.8072	-0.260261	0.14263	0.305345	no
XLOC_003659	Stard3	chr11:98219681-98242426	4.82816	4.98473	0.0460429	0.883343	0.942374	no
XLOC_003662	Erbb2	chr11:98273797-98300302	4.94581	3.79568	-0.38185	0.12607	0.281478	no
XLOC_003663	Grb7	chr11:98308147-98316687	5.19658	0.183884	-4.8207	0	0	yes
XLOC_003669	Psmd3	chr11:98543867-98557292	20.9946	15.049	-0.480351	0.0113056	0.0486295	yes
XLOC_003671	Thra	chr11:98603186-98636556	2.14346	5.82496	1.44231	0.00169515	0.0103697	yes
XLOC_003672	Msl1	chr11:98657082-98695121	40.4418	46.0493	0.18733	0.313011	0.507507	no
XLOC_003673	Casc3	chr11:98657082-98695121	19.8346	19.7876	-0.00342133	0.991318	0.995601	no
XLOC_003674	Rapgefl1	chr11:98698098-98715124	0.376859	1.09506	1.53891	0.0105798	0.0461375	yes
XLOC_003675	Wipf2	chr11:98724911-98767554	6.61258	4.60413	-0.522285	0.00488871	0.0248444	yes
XLOC_003676	Cdc6	chr11:98769202-98785256	13.161	8.94944	-0.556398	0.00130351	0.00835636	yes
XLOC_003677	Rara	chr11:98799009-98836256	7.20895	4.52332	-0.672407	0.0109267	0.0472649	yes
XLOC_003678	Igfbp4	chr11:98902573-98913957	32.6637	18.5652	-0.815089	5.09974e-06	6.82616e-05	yes
XLOC_003688	Eif1	chr11:100181309-100183410	157.739	106.297	-0.56944	0.000304917	0.00245228	yes
XLOC_003690	Fkbp10	chr11:100277007-100302403	6.22414	1.62721	-1.93547	9.12916e-08	1.84609e-06	yes
XLOC_003693	Cnp	chr11:100436252-100443053	2.64215	1.84206	-0.52039	0.129753	0.286262	no
XLOC_003694	Nkiras2	chr11:100484268-100512007	1.33278	1.6617	0.318222	0.557282	0.724164	no
XLOC_003697	Atp6v0a1	chr11:100870765-100925031	6.44849	7.18098	0.155219	0.487009	0.66718	no
XLOC_003698	Naglu	chr11:100931407-100938985	0.727957	1.10782	0.605796	0.417242	0.609419	no
XLOC_003700	Coasy	chr11:100943931-100947933	6.33234	6.97847	0.140172	0.652236	0.796202	no
XLOC_003701	Mlx	chr11:100948603-100956749	3.74771	3.39401	-0.143018	0.714415	0.838375	no
XLOC_003702	Tubg1	chr11:100981444-100987733	17.1768	16.1788	-0.0863557	0.679622	0.815435	no
XLOC_003705	Ramp2	chr11:101107647-101109564	2.76313	1.40966	-0.970962	0.0705093	0.190759	no
XLOC_003706	Vps25	chr11:101115056-101120860	46.7254	28.5663	-0.709891	0.000114776	0.00106595	yes
XLOC_003709	Psme3	chr11:101177564-101184844	66.884	50.0858	-0.417261	0.00837164	0.0384549	yes
XLOC_003710	Aoc2	chr11:101186376-101191112	1.12426	1.14189	0.0224418	0.964478	0.984801	no
XLOC_003713	Rundc1	chr11:101280127-101297107	3.80728	5.16081	0.438836	0.0717789	0.192987	no
XLOC_003714	Rpl27	chr11:101303558-101306910	629.773	278.283	-1.17828	4.9476e-12	2.01923e-10	yes
XLOC_003716	Rnd2	chr11:101329651-101333180	10.5574	23.4887	1.15372	9.06575e-05	0.000865042	yes
XLOC_003717	Nbr1	chr11:101413420-101443265	13.734	19.5504	0.509441	0.00386972	0.0205522	yes
XLOC_003720	Rdm1	chr11:101489262-101497395	3.23875	3.9422	0.283564	0.482312	0.663203	no
XLOC_003722	Dhx8	chr11:101594269-101628671	10.7275	8.57956	-0.322333	0.0722865	0.193868	no
XLOC_003727	G6pc3	chr11:102050948-102055397	12.0186	11.2931	-0.089823	0.740165	0.855164	no
XLOC_003728	BC030867	chr11:102110195-102126510	7.55809	6.68628	-0.176819	0.445457	0.633516	no
XLOC_003730	Tmub2	chr11:102146274-102157943	2.46154	2.93391	0.253263	0.566647	0.731319	no
XLOC_003731	Rundc3a	chr11:102254716-102264253	0.779964	2.03632	1.38448	0.0156293	0.0622993	no
XLOC_003732	Grn	chr11:102291635-102298123	7.50565	7.23042	-0.0538968	0.816304	0.902285	no
XLOC_003733	Fzd2	chr11:102465744-102470729	27.5846	14.9361	-0.88506	7.15357e-07	1.20216e-05	yes
XLOC_003735	Adam11	chr11:102622752-102641576	0.822895	1.01489	0.302538	0.41416	0.606815	no
XLOC_003738	Nmt1	chr11:102889664-102930223	18.3756	11.0595	-0.732505	0.00164489	0.0101172	yes
XLOC_003740	Hexim1	chr11:102977638-102982217	3.03131	2.72197	-0.155293	0.565766	0.730667	no
XLOC_003741	Hexim2	chr11:102994652-103001222	1.02805	0.830125	-0.308506	0.602174	0.758903	no
XLOC_003746	Arf2	chr11:103828057-103846650	12.1944	22.3282	0.872648	2.92319e-06	4.20697e-05	yes
XLOC_003753	Mettl2	chr11:104987738-105002462	14.1675	8.02393	-0.820201	0.000187765	0.00160662	yes
XLOC_003754	Tlk2	chr11:105042843-105145270	18.5862	19.6854	0.0828965	0.626728	0.776419	no
XLOC_003755	Mrc2	chr11:105153959-105212460	4.37639	3.92891	-0.155614	0.504281	0.68114	no
XLOC_003756	-	chr11:105369969-105375529	0	1.6407	1.79769e+308	0.00552119	0.0274069	yes
XLOC_003757	Tanc2	chr11:105451299-105790704	1.78074	2.2357	0.328246	0.101751	0.244638	no
XLOC_003760	Dcaf7	chr11:105898185-105920637	20.326	33.7525	0.731667	4.39149e-06	5.987e-05	yes
XLOC_003761	Taco1	chr11:105927329-105935703	5.75379	5.74217	-0.00291492	0.99257	0.996383	no
XLOC_003762	Map3k3	chr11:105945943-106022240	3.69653	2.84629	-0.377089	0.287543	0.480897	no
XLOC_003763	Ddx42	chr11:106078239-106110454	23.778	24.0658	0.0173544	0.913786	0.959293	no
XLOC_003764	Psmc5	chr11:106117498-106124426	136.647	97.1476	-0.492202	0.00185723	0.011165	yes
XLOC_003767	Snord104	chr11:106362210-106474244	3.33088	1.37259	-1.279	0.0655177	0.18154	no
XLOC_003769	Ccdc45	chr11:106650565-106680175	5.41312	5.39097	-0.00591387	0.979453	0.990792	no
XLOC_003771	Psmd12	chr11:107340841-107359350	95.8579	78.4897	-0.288394	0.068182	0.186412	no
XLOC_003772	Helz	chr11:107409229-107555143	12.7166	10.9439	-0.216584	0.268646	0.461613	no
XLOC_003774	Ccdc46	chr11:108286579-108721931	2.41116	3.0913	0.358487	0.231591	0.417526	no
XLOC_003775	Axin2	chr11:108781662-108812095	8.49055	9.01619	0.0866601	0.642774	0.788726	no
XLOC_003777	Gna13	chr11:109216091-109262683	13.1695	14.1251	0.101065	0.532613	0.705129	no
XLOC_003778	Amz2	chr11:109287259-109299462	13.8444	12.6016	-0.135699	0.472402	0.654761	no
XLOC_003781	Prkar1a	chr11:109511912-109531088	42.129	54.9844	0.384209	0.0153275	0.0613388	no
XLOC_003783	Map2k6	chr11:110260432-110377659	21.087	15.3129	-0.461609	0.0247504	0.0889315	no
XLOC_003786	Sox9	chr11:112643523-112649071	12.9846	26.7212	1.04118	3.19704e-10	9.91809e-09	yes
XLOC_003787	-	chr11:112722561-112736745	0.116924	1.53219	3.71194	0.132544	0.290344	no
XLOC_003789	Cog1	chr11:113510842-113545465	5.11872	6.77536	0.404513	0.178075	0.351455	no
XLOC_003790	D11Wsu47e	chr11:113545565-113557082	5.2546	4.45309	-0.238773	0.413401	0.606353	no
XLOC_003792	Rpl38	chr11:114529856-114533645	1751.34	604.341	-1.53502	0	0	yes
XLOC_003793	Ttyh2	chr11:114536781-114582298	1.49306	1.21046	-0.302715	0.37989	0.573913	no
XLOC_003797	Gprc5c	chr11:114712845-114734329	6.6552	0.562235	-3.56524	0	0	yes
XLOC_003798	Cd300a	chr11:114751354-114765965	1.12278	0.980928	-0.194855	0.53689	0.708327	no
XLOC_003800	Slc9a3r1	chr11:115024654-115042492	8.39737	2.72984	-1.62112	3.7251e-09	9.66154e-08	yes
XLOC_003801	Tmem104	chr11:115048800-115108339	2.44292	1.6455	-0.570077	0.0722754	0.193865	no
XLOC_003804	Cdr2l	chr11:115243229-115258048	6.87601	5.66902	-0.278472	0.243948	0.432281	no
XLOC_003805	Ict1	chr11:115265010-115272227	29.7218	30.3018	0.0278849	0.908593	0.956885	no
XLOC_003806	Kctd2	chr11:115281439-115294507	8.2937	7.32732	-0.178731	0.521461	0.69522	no
XLOC_003810	Nup85	chr11:115425757-115445238	30.8913	24.6163	-0.327589	0.0543845	0.159487	no
XLOC_003811	Mrps7	chr11:115465464-115468938	18.5496	12.6299	-0.554543	0.0111848	0.0481638	yes
XLOC_003812	2310067B10Rik	chr11:115626746-115674906	6.80831	6.40627	-0.0878111	0.723998	0.844246	no
XLOC_003813	Tsen54	chr11:115676052-115684416	3.77889	2.78383	-0.44089	0.194428	0.371263	no
XLOC_003817	Sap30bp	chr11:115794941-115828591	10.5083	8.60422	-0.288415	0.229651	0.415437	no
XLOC_003819	Unk	chr11:115891635-115922529	5.95788	7.81488	0.391424	0.0810028	0.210892	no
XLOC_003820	2310004N24Rik	chr11:116033201-116076632	6.74945	4.74588	-0.508094	0.327114	0.521123	no
XLOC_003823	Fam100b	chr11:116295407-116300391	19.5362	16.6766	-0.228329	0.307035	0.500977	no
XLOC_003827	1810032O08Rik,Snord1a	chr11:116532973-116555974	12.1262	7.4399	-0.704777	0.048533	0.146294	no
XLOC_003829	Snord1b	chr11:116532973-116555974	0	198.521	1.79769e+308	0.374629	0.5692	no
XLOC_003831	1110005A03Rik	chr11:116704828-116711054	7.2718	6.33715	-0.198479	0.502816	0.680074	no
XLOC_003832	Mfsd11	chr11:116715144-116736951	3.74546	3.53366	-0.083979	0.740898	0.855546	no
XLOC_003833	Mgat5b	chr11:116780176-116848258	1.2599	2.55668	1.02096	0.0484917	0.146206	no
XLOC_003834	2810008D09Rik	chr11:116938096-116940269	6.5372	3.9457	-0.728391	0.10863	0.255408	no
XLOC_003835	Sec14l1	chr11:116976485-117020582	12.6115	15.7975	0.324948	0.0787207	0.206184	no
XLOC_003836	Sept9	chr11:117060974-117223639	37.8848	33.0435	-0.197253	0.256469	0.446726	no
XLOC_003838	Tnrc6c	chr11:117515461-117624842	9.71563	8.19965	-0.244745	0.17072	0.341671	no
XLOC_003841	Syngr2	chr11:117670980-117675600	8.49523	3.71777	-1.19221	9.52498e-05	0.000902116	yes
XLOC_003842	Tk1	chr11:117676832-117701222	1.20547	1.60475	0.412755	0.436846	0.626061	no
XLOC_003844	Birc5	chr11:117710550-117717057	96.3886	50.2016	-0.941129	9.62774e-08	1.94188e-06	yes
XLOC_003846	Pgs1	chr11:117848170-117990533	5.66733	5.23198	-0.11531	0.720112	0.842214	no
XLOC_003850	Cbx2	chr11:118884342-118892584	22.8622	22.1359	-0.046577	0.779218	0.879609	no
XLOC_003851	Ccdc40	chr11:119089885-119126564	8.92251	6.24202	-0.515437	0.0702976	0.190428	no
XLOC_003852	Gaa	chr11:119129280-119147012	3.47549	3.39542	-0.0336286	0.902034	0.952808	no
XLOC_003854	Slc26a11	chr11:119216870-119242390	1.29603	3.70525	1.51547	0.00103409	0.00690391	yes
XLOC_003856	-	chr11:119288809-119292059	0.536824	1.05935	0.980661	0.227536	0.412616	no
XLOC_003859	A730011L01Rik	chr11:119352660-119372779	3.05724	3.61299	0.240964	0.310001	0.503993	no
XLOC_003861	Rptor	chr11:119464308-119760905	7.59724	6.76606	-0.16716	0.362538	0.557732	no
XLOC_003862	Chmp6	chr11:119775123-119780866	8.70599	5.0076	-0.79789	0.00306164	0.0169863	yes
XLOC_003863	Baiap2	chr11:119804405-119868096	2.42749	2.40082	-0.0159369	0.967606	0.985868	no
XLOC_003865	1810043H04Rik	chr11:119960247-119961738	19.9028	10.5006	-0.922497	0.0109091	0.0471994	yes
XLOC_003866	Bahcc1	chr11:120094260-120153611	8.64862	7.91099	-0.128612	0.467296	0.650006	no
XLOC_003870	Ccdc137	chr11:120319442-120328914	8.06419	4.89774	-0.719415	0.00310191	0.01716	yes
XLOC_003871	Hgs	chr11:120328948-120345298	6.51225	7.3028	0.165293	0.507094	0.683637	no
XLOC_003872	Mrpl12	chr11:120345982-120350068	65.572	26.4562	-1.30947	8.62355e-12	3.29468e-10	yes
XLOC_003873	Slc25a10	chr11:120353150-120362574	2.28411	2.31334	0.0183424	0.949674	0.97805	no
XLOC_003875	Anapc11	chr11:120459734-120469512	4.62026	2.78885	-0.728305	0.00961735	0.0429004	yes
XLOC_003877	Aspscr1	chr11:120533743-120570763	7.62807	5.20605	-0.551129	0.0726357	0.194532	no
XLOC_003878	Lrrc45	chr11:120575266-120582442	4.10892	5.67746	0.466486	0.226883	0.411675	no
XLOC_003879	Rac3	chr11:120582781-120585284	1.80226	0.771454	-1.22415	0.0993708	0.241225	no
XLOC_003880	Gps1	chr11:120645585-120650416	24.0618	19.404	-0.310391	0.105607	0.250678	no
XLOC_003881	Slc16a3	chr11:120809797-120820314	28.2015	5.93909	-2.24745	0	0	yes
XLOC_003884	Hexdc	chr11:121038906-121090623	1.36319	1.80974	0.408788	0.481022	0.662249	no
XLOC_003885	Narf	chr11:121098526-121119821	7.81982	9.89134	0.33903	0.0837928	0.215546	no
XLOC_003886	Foxk2	chr11:121121300-121171357	17.7803	18.0053	0.0181375	0.917678	0.96127	no
XLOC_003887	Fn3krp	chr11:121282686-121292604	6.35351	7.35725	0.211612	0.439333	0.628073	no
XLOC_003889	Tbcd	chr11:121313262-121534465	9.10715	10.0838	0.146964	0.452161	0.638685	no
XLOC_003892	Sfi1	chr11:3024023-3094234	4.55549	2.72335	-0.742221	0.059421	0.169707	no
XLOC_003893	Drg1	chr11:3149924-3166389	66.6926	50.9897	-0.387321	0.0414976	0.130599	no
XLOC_003894	Limk2	chr11:3243299-3309238	3.36	3.06752	-0.131387	0.608689	0.763969	no
XLOC_003895	Rnf185	chr11:3315985-3352328	8.18763	9.58577	0.227449	0.247442	0.436041	no
XLOC_003897	Smtn	chr11:3417524-3439295	3.18512	3.95231	0.311347	0.250925	0.439881	no
XLOC_003898	Tug1	chr11:3539796-3548933	65.2728	53.0382	-0.29945	0.103312	0.246754	no
XLOC_003900	4921536K21Rik	chr11:3785478-3801304	0.910364	1.26764	0.477629	0.474892	0.657212	no
XLOC_003902	Tcn2	chr11:3817080-3832081	4.26933	2.62479	-0.701809	0.0419891	0.131775	no
XLOC_003903	Mtfp1	chr11:3991483-3995434	3.01206	1.74887	-0.784334	0.0503561	0.150698	no
XLOC_003905	Ccdc157	chr11:4035162-4060296	0.67338	1.24828	0.890447	0.0098314	0.0436012	yes
XLOC_003907	Mtmr3	chr11:4380870-4494818	4.3959	6.42315	0.547124	0.0047036	0.0240405	yes
XLOC_003909	Uqcr10	chr11:4601970-4604347	154.481	84.681	-0.86732	4.70609e-06	6.35256e-05	yes
XLOC_003911	Nf2	chr11:4665847-4749547	9.74498	6.09023	-0.678162	0.0012681	0.00816971	yes
XLOC_003912	Nefh	chr11:4838758-4942797	2.08627	0.108344	-4.26724	5.97973e-05	0.000606561	yes
XLOC_003913	Gas2l1	chr11:4954133-4965330	2.00385	2.47614	0.305318	0.486169	0.666411	no
XLOC_003914	Ewsr1	chr11:4969690-4999080	109.86	105.683	-0.0559247	0.758068	0.867419	no
XLOC_003915	Emid1	chr11:5006265-5052225	8.95052	11.6814	0.384166	0.284613	0.478002	no
XLOC_003916	Kremen1	chr11:5091555-5161613	1.47031	1.52237	0.0501961	0.866578	0.932851	no
XLOC_003917	Znrf3	chr11:5175887-5344850	3.54846	3.69202	0.0572162	0.765921	0.871731	no
XLOC_003918	Ccdc117	chr11:5425906-5442220	15.8021	14.1813	-0.156125	0.397586	0.591364	no
XLOC_003919	Mrps24	chr11:5603985-5607702	8.22967	6.13714	-0.423268	0.169025	0.339736	no
XLOC_003921	Pgam2	chr11:5688485-5704807	0.621434	1.96496	1.66083	0.0239153	0.0866975	no
XLOC_003922	Polm	chr11:5727862-5738019	1.94686	1.95651	0.00713498	0.982858	0.991979	no
XLOC_003923	Pold2	chr11:5761868-5778259	24.3219	20.2704	-0.262881	0.193577	0.370081	no
XLOC_003927	Nudcd3	chr11:5997098-6355740	23.3138	20.4699	-0.18768	0.865601	0.932489	no
XLOC_003928	Gm11968,Npc1l1	chr11:5997098-6355740	169.443	82.1656	-1.04419	0.561707	0.727592	no
XLOC_003930	Ddx56	chr11:5997098-6355740	9.60182	5.96438	-0.686935	0.797733	0.890812	no
XLOC_003931	Tmed4	chr11:5997098-6355740	22.9658	20.9518	-0.132412	0.949691	0.97805	no
XLOC_003932	H2afv	chr11:5997098-6355740	37.8931	34.7851	-0.123469	0.935349	0.970959	no
XLOC_003933	Purb	chr11:6367601-6376079	18.8475	15.6041	-0.272449	0.0849967	0.217843	no
XLOC_003935	Gm11974	chr11:6425593-6428763	22.4835	11.4516	-0.973322	0.000863041	0.00595511	yes
XLOC_003936	Nacad	chr11:6497825-6506057	0.120224	1.10027	3.19406	4.6501e-05	0.000487445	yes
XLOC_003937	Tbrg4	chr11:6515596-6526070	21.9032	16.2493	-0.430763	0.0300194	0.102754	no
XLOC_003938	Snora5c	chr11:6515596-6526070	81.9487	0	-1.79769e+308	0.367988	0.562772	no
XLOC_003943	Igfbp3	chr11:7106095-7113926	6.44827	1.07968	-2.57831	0	0	yes
XLOC_003944	Tns3	chr11:8331499-8564538	6.45076	6.85859	0.0884424	0.686751	0.820083	no
XLOC_003945	Hus1	chr11:8893144-8911140	9.65175	10.3024	0.0941224	0.607664	0.763359	no
XLOC_003948	Fignl1	chr11:11700290-11708965	17.9241	15.7578	-0.185838	0.28475	0.478105	no
XLOC_003949	Ddc	chr11:11714103-11798147	1.01345	0.947428	-0.0971934	0.908812	0.956904	no
XLOC_003950	Grb10	chr11:11830501-11937423	159.821	157.106	-0.0247186	0.89728	0.950198	no
XLOC_003953	Sec61g	chr11:16401640-16408487	174.95	128.116	-0.449499	0.0184938	0.0709114	no
XLOC_003956	Pno1	chr11:17103202-17111592	32.6293	16.1252	-1.01685	7.04545e-09	1.74685e-07	yes
XLOC_003957	Etaa1	chr11:17838699-17853878	11.2088	8.96198	-0.322743	0.0611171	0.172977	no
XLOC_003958	Meis1	chr11:18780430-18918972	10.2961	4.48916	-1.19758	1.37778e-09	3.81101e-08	yes
XLOC_003959	Actr2	chr11:19962306-20012954	35.3373	31.8635	-0.149287	0.3444	0.539457	no
XLOC_003960	Cep68	chr11:20127039-20149427	9.7878	11.3292	0.210991	0.214704	0.396313	no
XLOC_003961	Slc1a4	chr11:20201837-20232716	6.5596	6.46627	-0.0206741	0.924082	0.96483	no
XLOC_003962	Aftph	chr11:20585087-20641551	8.97317	8.74031	-0.0379331	0.83665	0.914476	no
XLOC_003963	1110067D22Rik	chr11:20723357-20731111	1.25513	2.80139	1.15831	0.000188344	0.00161086	yes
XLOC_003964	Ugp2	chr11:21138891-21271206	4.84509	9.40977	0.957637	0.00638969	0.0307608	yes
XLOC_003967	Mdh1	chr11:21456694-21471937	52.9274	34.448	-0.619595	0.000105501	0.000987476	yes
XLOC_003968	Otx1	chr11:21894766-21901654	19.8675	24.7324	0.315989	0.118472	0.270058	no
XLOC_003969	Ehbp1	chr11:21905282-22186922	10.4825	12.4241	0.245157	0.393516	0.587268	no
XLOC_003970	B3gnt2	chr11:22734738-22760336	1.98438	1.14747	-0.790227	0.0291427	0.100653	no
XLOC_003971	Commd1	chr11:22799727-22882284	48.9307	29.0629	-0.751562	0.000467168	0.00351773	yes
XLOC_003972	Ahsa2	chr11:23206885-23397946	16.1792	18.386	0.184471	0.603649	0.760161	no
XLOC_003975	0610010F05Rik	chr11:23473775-23533631	7.10989	12.0599	0.762317	3.0111e-05	0.000331429	yes
XLOC_003976	Pex13	chr11:23546478-23632876	6.47764	7.22059	0.15665	0.573204	0.736307	no
XLOC_003978	Papolg	chr11:23762645-23795270	23.8217	21.7144	-0.133623	0.556115	0.723421	no
XLOC_003982	Vrk2	chr11:26287083-26493920	6.2522	4.92471	-0.344324	0.269099	0.462248	no
XLOC_003984	Ccdc104	chr11:29121535-29147272	22.9758	28.8308	0.327499	0.0683508	0.186714	no
XLOC_003985	Prorsd1	chr11:29410911-29415037	3.35065	2.55885	-0.388947	0.203386	0.38208	no
XLOC_003986	Rps27a	chr11:29445841-29478352	736.404	196.926	-1.90284	0	0	yes
XLOC_003989	Spnb2	chr11:29999238-30119772	26.863	27.6325	0.0407431	0.813591	0.900482	no
XLOC_003991	Acyp2	chr11:30405991-30549396	5.37691	4.4749	-0.26492	0.481314	0.662439	no
XLOC_003992	Erlec1	chr11:30799658-30854136	5.12388	5.52386	0.10844	0.684694	0.818525	no
XLOC_003993	Chac2	chr11:30854397-31003858	1.19596	1.34154	0.165724	0.794281	0.888926	no
XLOC_003994	Stc2	chr11:31259440-31270092	9.59325	2.94678	-1.70288	1.66016e-07	3.21956e-06	yes
XLOC_003995	Bod1	chr11:31563552-31571862	23.8745	23.2628	-0.0374472	0.848468	0.92177	no
XLOC_003997	Rhbdf1	chr11:32109584-32122293	1.14671	0.957335	-0.2604	0.556303	0.723538	no
XLOC_003998	Nprl3	chr11:32126504-32167614	2.16644	2.3612	0.124196	0.762992	0.870882	no
XLOC_004001	Fgf18	chr11:33017430-33047400	0.388502	3.46303	3.15604	0.000143303	0.00128196	yes
XLOC_004002	Npm1	chr11:33052497-33063206	4329.34	1840.25	0	1	1	no
XLOC_004004	Ranbp17	chr11:33111793-33414333	5.81879	6.4268	0.143382	0.590461	0.74957	no
XLOC_004009	Ccdc99	chr11:34622686-34647143	18.5204	18.1821	-0.0266003	0.877552	0.93897	no
XLOC_004011	Rars	chr11:35621882-35648030	86.1439	50.1182	-0.781413	8.93248e-07	1.46635e-05	yes
XLOC_004012	Wwc1	chr11:35651898-35793744	8.37479	8.86509	0.0820822	0.663573	0.803729	no
XLOC_004013	Odz2	chr11:35820164-36757745	0.166001	1.09468	2.72125	0.00013057	0.0011856	yes
XLOC_004015	Mat2b	chr11:40492815-40508705	21.7325	19.0968	-0.186521	0.321522	0.515648	no
XLOC_004016	Hmmr	chr11:40514889-40546939	32.5395	31.7998	-0.0331752	0.833532	0.912569	no
XLOC_004017	Ccng1	chr11:40562053-40568788	10.0432	11.7942	0.231862	0.178162	0.35149	no
XLOC_004022	Pttg1	chr11:43233749-43239750	37.9206	31.8436	-0.251979	0.267018	0.459174	no
XLOC_004024	Ttc1	chr11:43543507-43561475	28.4198	20.9725	-0.438396	0.0140388	0.0572712	no
XLOC_004026	Ublcp1	chr11:44268072-44284050	28.7038	25.8596	-0.150542	0.383766	0.578172	no
XLOC_004029	Lsm11	chr11:45741538-45758437	2.45882	2.2219	-0.146176	0.532874	0.705231	no
XLOC_004030	Thg1l	chr11:45758885-45768996	19.8112	8.7564	-1.17791	6.5144e-05	0.000648762	yes
XLOC_004032	Cyfip2	chr11:46007350-46126361	4.80903	13.8693	1.52807	0	0	yes
XLOC_004038	Trim41	chr11:48619905-48630893	3.4015	4.25674	0.323579	0.210767	0.39187	no
XLOC_004048	Cnot6	chr11:49485137-49526212	22.545	31.3922	0.477599	0.0110362	0.0476418	yes
XLOC_004049	Sqstm1	chr11:50013619-50024348	7.08146	8.76244	0.307285	0.209612	0.390405	no
XLOC_004051	Maml1	chr11:50068962-50105838	8.701	7.54581	-0.205505	0.302064	0.496138	no
XLOC_004052	Canx	chr11:50107458-50139175	124.189	89.0498	-0.479853	0.00730907	0.0344334	yes
XLOC_004054	Rufy1	chr11:50202690-50244613	4.72799	4.68657	-0.0126944	0.967205	0.985692	no
XLOC_004055	Zfp354c	chr11:50624586-50641233	10.4641	11.5665	0.144499	0.378221	0.572159	no
XLOC_004057	Zfp454	chr11:50686217-50701115	4.49047	5.33445	0.248473	0.426678	0.618046	no
XLOC_004058	Zfp2	chr11:50712213-50729663	5.46092	5.43868	0	1	1	no
XLOC_004062	Hnrnpab	chr11:51398258-51420383	444.738	338.539	-0.393632	0.0520652	0.154556	no
XLOC_004063	Rmnd5b	chr11:51433274-51449398	3.58744	4.71201	0.393388	0.403037	0.596639	no
XLOC_004065	0610009B22Rik	chr11:51498886-51502136	35.7192	36.9575	0.0491664	0.80783	0.896959	no
XLOC_004066	Sec24a	chr11:51505764-51571425	6.52434	5.00938	-0.3812	0.0323734	0.108788	no
XLOC_004068	Ube2b	chr11:51798647-51814263	22.6281	24.9281	0.139656	0.448335	0.635851	no
XLOC_004072	Tcf7	chr11:52060847-52096464	9.04582	3.75975	-1.26662	6.74791e-06	8.78054e-05	yes
XLOC_004074	Hspa4	chr11:53073287-53113981	266.014	237.832	-0.161562	0.467956	0.650483	no
XLOC_004076	Uqcrq	chr11:53242449-53244333	98.8374	57.3823	-0.784452	0.000313417	0.0025143	yes
XLOC_004080	Rad50	chr11:53463020-53520821	20.2673	17.2669	-0.231143	0.145782	0.30905	no
XLOC_004082	Slc22a5	chr11:53678043-53705205	0.998813	1.04141	0.0602466	0.875482	0.937703	no
XLOC_004085	Pdlim4	chr11:53868429-53882519	1.74656	3.12671	0.840129	0.178018	0.351392	no
XLOC_004089	Cdc42se2	chr11:54530916-54601205	21.2721	27.8042	0.386343	0.0187225	0.0715303	no
XLOC_004090	Lyrm7	chr11:54652790-54674093	0.445252	1.19085	1.4193	0.00997428	0.0441322	yes
XLOC_004091	Tnip1	chr11:54724288-54776442	1.32721	1.43869	0.116358	0.784207	0.882184	no
XLOC_004092	Anxa6	chr11:54792463-54846973	1.63622	2.51795	0.621881	0.0966317	0.236644	no
XLOC_004096	4921508A21Rik	chr11:55005220-55011184	1.34931	1.33144	-0.0192301	0.965087	0.985025	no
XLOC_004098	Sparc	chr11:55208002-55233605	60.3973	61.9802	0.0373231	0.817597	0.902828	no
XLOC_004099	Atox1	chr11:55260144-55274640	38.7435	23.3846	-0.728394	0.00781979	0.0364714	yes
XLOC_004102	Fam114a2	chr11:57296491-57332146	10.0217	10.2419	0.0313619	0.882057	0.941401	no
XLOC_004104	Gemin5	chr11:57933351-57982041	20.2475	9.08385	-1.15637	3.51819e-11	1.24707e-09	yes
XLOC_004105	Zfp672	chr11:58120570-58143841	3.07045	2.59891	-0.240542	0.754556	0.864382	no
XLOC_004119	Zfp39	chr11:58701654-58717727	3.09574	4.22813	0.449734	0.0441303	0.136374	no
XLOC_004120	Rnf187	chr11:58745778-58752408	45.1559	38.8982	-0.215211	0.209228	0.389917	no
XLOC_004121	Hist3h2bb-ps	chr11:58762398-58768014	1.70289	2.70822	0.669354	0.49843	0.675956	no
XLOC_004125	Guk1	chr11:58997356-59005454	44.5695	22.4362	-0.990226	2.53204e-07	4.74688e-06	yes
XLOC_004126	2610507I01Rik	chr11:59011294-59015933	1.15182	1.95331	0.762011	0.0306422	0.104363	no
XLOC_004127	Arf1	chr11:59024913-59041769	160.631	124.34	-0.369462	0.0203738	0.0765707	no
XLOC_004128	Wnt3a	chr11:59061543-59104253	0.231824	1.16655	2.33114	0.000973869	0.00657525	yes
XLOC_004130	Snap47	chr11:59220651-59263493	12.722	13.1997	0.0531726	0.812333	0.899916	no
XLOC_004131	Zfp867	chr11:59263546-59285976	2.35381	2.39132	0.0228097	0.941317	0.974038	no
XLOC_004132	Zkscan17	chr11:59298937-59324569	10.8539	9.40969	-0.205992	0.324463	0.518701	no
XLOC_004135	1700007J10Rik	chr11:59475996-59594362	1.43391	1.18195	-0.278789	0.82621	0.907522	no
XLOC_004136	Pld6	chr11:59595537-59601159	1.00113	0.221006	-2.17948	0.00258485	0.0147647	yes
XLOC_004137	Flcn	chr11:59604926-59623275	4.57375	3.86507	-0.242884	0.377614	0.571558	no
XLOC_004138	Cops3	chr11:59623581-59690035	65.3351	54.718	-0.255843	0.126247	0.281654	no
XLOC_004141	Pemt	chr11:59784118-59860287	1.87199	1.06245	-0.817188	0.280677	0.47401	no
XLOC_004142	Srebf1	chr11:59918514-60034106	4.30846	5.2201	0.276905	0.349907	0.544764	no
XLOC_004143	Tom1l2	chr11:60040215-60166407	1.47191	3.39504	1.20574	0.000361641	0.00284512	yes
XLOC_004144	Atpaf2	chr11:60214125-60230601	8.43578	7.07732	-0.253319	0.284606	0.478002	no
XLOC_004145	Flii	chr11:60513191-60540723	11.3379	11.9567	0.0766688	0.769142	0.873459	no
XLOC_004146	Top3a	chr11:60553079-60624767	4.82201	3.38943	-0.508593	0.185857	0.360507	no
XLOC_004147	Shmt1	chr11:60553079-60624767	11.9064	10.0041	-0.251146	0.343209	0.538428	no
XLOC_004148	Tmem11	chr11:60677953-60692540	28.7498	19.8267	-0.536109	0.0123329	0.0519335	no
XLOC_004149	Gm16515	chr11:60715747-60727294	11.04	8.76032	-0.333678	0.0667057	0.1839	no
XLOC_004151	Usp22	chr11:60965282-60988561	36.8735	35.1122	-0.0706129	0.654617	0.797985	no
XLOC_004152	Aldh3a2	chr11:61058256-61080629	2.93853	4.82764	0.716221	0.0106624	0.0463626	yes
XLOC_004156	Mapk7	chr11:61302311-61307762	12.6939	9.47508	-0.421931	0.112436	0.261289	no
XLOC_004157	Epn2	chr11:61330750-61393189	6.58527	5.4739	-0.266674	0.179481	0.353256	no
XLOC_004159	Prpsap2	chr11:61543151-61575590	11.9064	11.7859	-0.014684	0.948725	0.977739	no
XLOC_004160	Ulk2	chr11:61589085-61668594	2.85324	6.77738	1.24813	8.98035e-10	2.5694e-08	yes
XLOC_004161	Akap10	chr11:61681397-61743728	3.42598	2.40494	-0.510517	0.0358707	0.117388	no
XLOC_004162	Zswim7	chr11:62080725-62094897	3.98509	1.97782	-1.0107	0.0397176	0.126621	no
XLOC_004163	Ncor1	chr11:62094974-62327402	24.8652	29.9255	0.267247	0.17159	0.342768	no
XLOC_004164	Cenpv	chr11:62338443-62352763	4.94965	8.24373	0.735969	0.0844785	0.216931	no
XLOC_004166	BC046404	chr11:62416378-62462025	2.79624	3.97499	0.507462	0.120109	0.272426	no
XLOC_004167	Zfp287	chr11:62523170-62542782	2.37019	2.21733	-0.0961761	0.70876	0.834906	no
XLOC_004168	Zfp286	chr11:62590005-62602919	3.1204	3.6127	0.211348	0.481418	0.66246	no
XLOC_004169	Hs3st3b1	chr11:63698194-63735786	4.39621	0.309296	-3.8292	0	0	yes
XLOC_004170	Cox10	chr11:63776122-63892974	9.18964	7.00944	-0.390709	0.0728464	0.19493	no
XLOC_004172	Arhgap44	chr11:64792536-64976463	1.94179	1.71155	-0.182088	0.645413	0.790712	no
XLOC_004175	Map2k4	chr11:65501745-65601799	17.6393	17.3439	-0.0243609	0.882136	0.941401	no
XLOC_004180	2310004I24Rik	chr11:66851378-66866120	3.14373	3.93659	0.324469	0.375179	0.569222	no
XLOC_004185	Ntn1	chr11:68022865-68200328	4.21015	5.24666	0.317527	0.131132	0.288435	no
XLOC_004186	Ndel1	chr11:68634071-68666633	3.44134	3.14352	-0.130589	0.695098	0.825313	no
XLOC_004189	Rangrf	chr11:68781632-68787322	53.9132	17.5098	-1.62248	6.87228e-13	3.18504e-11	yes
XLOC_004190	Pfas	chr11:68799202-68821962	16.2357	9.66069	-0.748973	4.66866e-06	6.30647e-05	yes
XLOC_004193	Cntrob	chr11:69112994-69137375	3.77011	5.49444	0.543365	0.0298403	0.102416	no
XLOC_004194	Chd3	chr11:69156774-69182893	4.49604	12.8159	1.51121	3.83915e-13	1.86511e-11	yes
XLOC_004195	Cyb5d1	chr11:69204378-69211736	9.95228	14.4856	0.541516	0.00511711	0.0258094	yes
XLOC_004196	Tmem88	chr11:69204378-69211736	8.74794	2.19248	-1.99638	0.00115179	0.00753881	yes
XLOC_004197	Kdm6b	chr11:69212018-69230739	11.2609	12.251	0.12158	0.481411	0.66246	no
XLOC_004199	Efnb3	chr11:69367591-69373739	6.65277	5.26425	-0.337727	0.14747	0.311329	no
XLOC_004200	Wrap53	chr11:69374703-69392951	2.97778	2.70806	-0.13698	0.717257	0.840129	no
XLOC_004201	Atp1b2	chr11:69413239-69419462	1.79357	2.06778	0.205246	0.621883	0.772902	no
XLOC_004203	Mir467f	chr11:69446472-69467658	2.207	1.23225	-0.84079	0.00508881	0.0256976	yes
XLOC_004205	Mpdu1	chr11:69468538-69476192	11.1035	9.33678	-0.250018	0.338918	0.534104	no
XLOC_004206	Cd68	chr11:69477872-69479564	1.00004	1.96534	0.974719	0.126268	0.281657	no
XLOC_004207	Eif4a1	chr11:69480437-69485925	377.506	239.818	-0.654555	0.000175414	0.00151516	yes
XLOC_004208	Senp3	chr11:69486611-69495586	25.6329	16.1993	-0.662064	0.000172234	0.00149687	yes
XLOC_004210	Polr2a	chr11:69547309-69572136	36.7262	42.84	0.222148	0.171128	0.34206	no
XLOC_004213	Fgf11	chr11:69610670-69615191	1.03761	0.863793	-0.264501	0.629577	0.778773	no
XLOC_004217	Nlgn2	chr11:69636624-69649371	9.37099	7.36885	-0.346762	0.112938	0.262221	no
XLOC_004218	Tnk1	chr11:69659873-69672232	1.50439	1.11214	-0.435839	0.366265	0.561437	no
XLOC_004220	Kctd11	chr11:69691765-69694487	3.50348	1.58878	-1.14086	0.000165083	0.00145068	yes
XLOC_004222	2810408A11Rik	chr11:69710806-69714488	2.29654	3.2025	0.479735	0.312213	0.506697	no
XLOC_004223	Eif5a	chr11:69730213-69735460	460.302	219.637	-1.06746	3.68281e-10	1.12969e-08	yes
XLOC_004224	Slc2a4	chr11:69755787-69761692	0.756926	1.06774	0.49634	0.290037	0.483462	no
XLOC_004225	Rai12	chr11:69781726-69804102	35.1606	25.1511	-0.483335	0.0331277	0.110528	no
XLOC_004226	Acadvl	chr11:69823693-69830034	4.01247	7.44831	0.892422	0.00281582	0.0158675	yes
XLOC_004227	Slc16a13	chr11:70030293-70034496	3.92189	2.94072	-0.41538	0.136975	0.296755	no
XLOC_004229	0610010K14Rik	chr11:70048705-70051416	33.5663	35.3225	0.0735764	0.78037	0.879991	no
XLOC_004230	Rnasek	chr11:70051623-70053355	36.1595	20.1066	-0.846709	0.00163671	0.0100799	yes
XLOC_004234	Pelp1	chr11:70204049-70223533	12.4434	6.92855	-0.844755	4.7582e-05	0.000497415	yes
XLOC_004238	Slc25a11	chr11:70457528-70465281	19.8489	18.8368	-0.075505	0.714355	0.838375	no
XLOC_004239	Pfn1	chr11:70465348-70468152	396.384	270.727	-0.550062	0.00066242	0.00472054	yes
XLOC_004240	Camta2,Spag7	chr11:70477270-70501607	22.5985	17.835	-0.341518	0.143798	0.306303	no
XLOC_004243	Nup88	chr11:70658264-70783481	47.7719	51.7936	0.116611	0.565367	0.730356	no
XLOC_004244	C1qbp	chr11:70783701-70796528	174.652	81.6554	-1.09686	1.9698e-11	7.22299e-10	yes
XLOC_004245	Dhx33	chr11:70797592-70817934	12.0424	7.34599	-0.713089	3.12642e-05	0.000343529	yes
XLOC_004246	Derl2	chr11:70820946-70832859	7.18698	5.78008	-0.314298	0.121203	0.27429	no
XLOC_004247	6330403K07Rik	chr11:70833112-70847119	18.2497	35.7923	0.971775	0.00151068	0.00944967	yes
XLOC_004248	Nlrp1a	chr11:70904698-70958206	9.5717	4.30223	-1.15369	3.13766e-10	9.74967e-09	yes
XLOC_004254	4933427D14Rik	chr11:71967503-72017469	4.00163	4.09307	0.0325934	0.892868	0.947843	no
XLOC_004255	Med31	chr11:72025225-72032061	10.9117	8.08946	-0.431767	0.118143	0.269531	no
XLOC_004257	Tekt1	chr11:72158221-72175382	1.21305	1.27431	0.0710767	0.917564	0.961255	no
XLOC_004258	Smtnl2	chr11:72202667-72225218	10.7268	2.23851	-2.26061	0	0	yes
XLOC_004261	Cyb5d2	chr11:72590517-72609341	1.44853	1.23241	-0.233111	0.564768	0.729928	no
XLOC_004262	Gsg2	chr11:72904096-72960951	9.92982	7.59099	-0.38748	0.0651879	0.181022	no
XLOC_004263	Tmem93	chr11:72989004-72990544	14.6552	9.31147	-0.654332	0.00336301	0.0183499	yes
XLOC_004264	Ctns	chr11:72996539-73012544	2.67503	2.2976	-0.219427	0.488695	0.668293	no
XLOC_004286	Pafah1b1	chr11:74487425-74538077	32.1154	32.022	-0.00420412	0.979897	0.990815	no
XLOC_004287	Sgsm2	chr11:74662765-74710582	0.825455	1.60737	0.961443	0.00729081	0.0343643	yes
XLOC_004288	Srr	chr11:74711581-74739300	8.07791	7.71288	-0.0667125	0.791781	0.887439	no
XLOC_004289	Mir684-1	chr11:74739373-74977950	465.945	551.382	0.242892	0.946301	0.97645	no
XLOC_004291	Dph1,Ovca2	chr11:74989444-75003985	9.90325	7.0141	-0.497643	0.0259939	0.0923781	no
XLOC_004292	Rpa1	chr11:75113760-75161885	32.5194	24.3849	-0.415312	0.0104552	0.0457111	yes
XLOC_004293	Serpinf1	chr11:75223530-75236125	1.17452	2.48717	1.08244	0.0587261	0.1683	no
XLOC_004295	Wdr81	chr11:75254444-75268219	1.45533	0.96287	-0.595935	0.105884	0.25108	no
XLOC_004298	Fam101b	chr11:75832477-75841284	8.10714	2.77113	-1.54872	6.01053e-11	2.08042e-09	yes
XLOC_004299	Vps53	chr11:75859727-75993132	9.0271	11.1114	0.299708	0.1248	0.279949	no
XLOC_004300	Gemin4	chr11:76015528-76031074	8.26532	7.08162	-0.22299	0.320355	0.514596	no
XLOC_004301	Glod4	chr11:76033896-76057201	24.423	18.8826	-0.37118	0.0262486	0.0930213	no
XLOC_004302	Nxn	chr11:76070727-76212643	9.45991	10.8042	0.191689	0.348162	0.543107	no
XLOC_004303	Abr	chr11:76230235-76391229	9.83884	12.2387	0.314885	0.101916	0.244796	no
XLOC_004304	Gosr1	chr11:76540103-76577057	4.07914	3.94533	-0.0481175	0.82065	0.904735	no
XLOC_004305	Cpd	chr11:76590709-76660510	6.67942	10.0822	0.59402	0.000266103	0.0021823	yes
XLOC_004306	Ccdc55	chr11:76857793-76891937	11.4853	12.5199	0.124434	0.487797	0.667638	no
XLOC_004308	Ankrd13b	chr11:77283984-77303180	4.82243	8.60222	0.834949	0.000767389	0.00538636	yes
XLOC_004309	Trp53i13	chr11:77321515-77326775	1.1828	1.53799	0.37884	0.624595	0.774682	no
XLOC_004310	Taok1	chr11:77342632-77421317	19.2495	25.8978	0.428008	0.0113701	0.0488628	yes
XLOC_004311	Cryba1	chr11:77531913-77538795	1.25529	0.14799	-3.08445	0.000594327	0.00432219	yes
XLOC_004312	Pipox	chr11:77694116-77707374	3.16647	3.42342	0.112564	0.766047	0.871731	no
XLOC_004314	Eral1	chr11:77886877-77893885	6.26826	5.60336	-0.161774	0.560875	0.726908	no
XLOC_004315	Traf4	chr11:77908174-77979052	9.01862	9.05908	0.00645781	0.982998	0.992016	no
XLOC_004317	Rpl23a	chr11:77994436-77997086	1653.37	1040.53	-0.668094	0.000117112	0.00108228	yes
XLOC_004319	Snord4a	chr11:77994436-77997086	241.073	0	-1.79769e+308	0.479139	0.660701	no
XLOC_004321	Supt6h	chr11:78020250-78068998	23.9715	24.6865	0.0424002	0.817791	0.902886	no
XLOC_004324	Sarm1	chr11:78285831-78311256	0.389711	1.60397	2.04117	1.25446e-05	0.000153331	yes
XLOC_004325	Tmem199	chr11:78320556-78325670	8.00373	6.57052	-0.284664	0.337919	0.532793	no
XLOC_004326	Tnfaip1	chr11:78336351-78349762	19.014	19.5047	0.0367591	0.836385	0.914239	no
XLOC_004327	Tmem97	chr11:78349781-78364237	21.1122	9.57775	-1.14032	4.02968e-05	0.00042875	yes
XLOC_004328	Nlk	chr11:78380666-78510927	23.6238	19.7921	-0.255319	0.143024	0.305734	no
XLOC_004329	Fam58b	chr11:78564007-78565231	13.0929	11.1529	-0.231363	0.341396	0.536551	no
XLOC_004331	Ksr1	chr11:78826885-78959926	1.18262	1.06632	-0.149349	0.665667	0.805528	no
XLOC_004332	Wsb1	chr11:79052883-79068197	24.4067	33.4724	0.455696	0.00979449	0.0434576	yes
XLOC_004338	Utp6	chr11:79747457-79775889	25.6111	21.6968	-0.239284	0.133388	0.291428	no
XLOC_004339	Crlf3	chr11:79860000-79894457	13.354	7.45486	-0.841015	0.000351112	0.00276683	yes
XLOC_004340	1110002N22Rik	chr11:79950179-79955655	11.8656	9.13078	-0.377979	0.126227	0.281654	no
XLOC_004341	5730455P16Rik	chr11:80173993-80191517	6.97573	9.11009	0.385122	0.0279434	0.0974786	no
XLOC_004347	-	chr11:82592989-82594501	1.52685	1.11363	-0.455287	0.563747	0.729137	no
XLOC_004348	Rffl	chr11:82594636-82684712	3.25486	2.66654	-0.287625	0.441455	0.62979	no
XLOC_004349	Rad51l3	chr11:82686566-82704117	1.56515	1.47248	-0.0880561	0.71327	0.837589	no
XLOC_004350	Nle1	chr11:82714268-82721897	6.56278	3.99448	-0.716298	0.0498083	0.149456	no
XLOC_004352	Slfn8,Slfn9	chr11:82791496-82834312	1.96669	5.81834	1.56484	2.80004e-10	8.78615e-09	yes
XLOC_004355	Pex12	chr11:83105200-83112639	4.09614	2.97783	-0.460003	0.0977262	0.238516	no
XLOC_004363	Dusp14	chr11:83860495-83881859	1.68593	2.61853	0.635216	0.185848	0.360507	no
XLOC_004364	Tada2a	chr11:83892421-83943070	11.6875	8.25917	-0.500892	0.0169189	0.0662396	no
XLOC_004366	Aatf	chr11:84236357-84327003	37.3795	26.3123	-0.506508	0.00386775	0.0205475	yes
XLOC_004367	Lhx1	chr11:84331484-84339036	0.0126629	1.80679	7.15668	0.0029271	0.0163727	yes
XLOC_004369	Mrm1	chr11:84626562-84633017	2.99329	3.49353	0.222951	0.451443	0.638378	no
XLOC_004371	Ggnbp2	chr11:84645862-84684240	26.4248	24.9343	-0.0837628	0.600321	0.757289	no
XLOC_004372	Pigw	chr11:84689814-84729858	3.27644	1.44053	-1.18553	0.00747508	0.0350688	yes
XLOC_004373	Znhit3	chr11:84689814-84729858	29.6137	17.4534	-0.762761	0.00284	0.0159836	yes
XLOC_004374	Usp32	chr11:84797989-84953457	5.78846	6.30118	0.122443	0.476153	0.658387	no
XLOC_004375	Appbp2	chr11:85000635-85048622	27.1758	31.8433	0.228665	0.19136	0.367457	no
XLOC_004379	Brip1	chr11:85871637-86014695	3.01088	3.13569	0.0585968	0.763106	0.870882	no
XLOC_004380	Ints2	chr11:86020377-86071070	12.9677	11.2785	-0.201346	0.25178	0.440644	no
XLOC_004381	Med13	chr11:86077891-86171134	16.4702	19.8421	0.268714	0.105336	0.250278	no
XLOC_004382	Rps6kb1	chr11:86312512-86358309	12.5425	16.3243	0.380189	0.0223879	0.0824563	no
XLOC_004383	Vmp1	chr11:86397366-86497324	14.5013	11.9807	-0.275467	0.116934	0.268019	no
XLOC_004384	Cltc	chr11:86508154-86570994	47.1974	50.9563	0.110553	0.501104	0.678669	no
XLOC_004385	Dhx40	chr11:86582350-86621162	17.1509	15.6673	-0.130526	0.423376	0.614998	no
XLOC_004386	Ypel2	chr11:86749926-86807264	0.327171	1.25108	1.93506	8.59227e-06	0.000109424	yes
XLOC_004387	Gdpd1	chr11:86847295-86887639	9.78643	16.3181	0.737622	8.35065e-05	0.000807272	yes
XLOC_004388	1200011M11Rik	chr11:86891233-86900279	10.5838	8.28493	-0.353299	0.0620909	0.174777	no
[truncated: 10,454 more rows]

## Sheet: DEG
Test ID	Gene Name	Locus	E8.5 FPKM	E10.5 FPKM	log2(fold_change)	p_value	q_value	significant
XLOC_000001	Lypla1	chr1:4797956-4836816	23.1337	14.3481	-0.689131	2.60646e-05	0.000293127	yes
XLOC_000002	Tcea1	chr1:4847774-4887990	78.6274	58.7701	-0.419951	0.00887057	0.0403305	yes
XLOC_000007	St18	chr1:6477311-6851021	0.0139708	5.55235	8.63454	1.48985e-10	4.84988e-09	yes
XLOC_000008	Pcmtd1	chr1:7079000-7163790	3.63988	6.57471	0.853036	3.55655e-05	0.00038461	yes
XLOC_000009	Rrs1	chr1:9535488-9537536	20.954	12.2379	-0.775872	4.23282e-05	0.000447874	yes
XLOC_000016	Prex2	chr1:10983545-11293763	2.08362	3.33328	0.67785	0.000232938	0.00194291	yes
XLOC_000019	Sulf1	chr1:12682471-12851366	23.7673	15.2203	-0.642982	0.000394579	0.00306147	yes
XLOC_000023	Rdh10	chr1:16095962-16123849	5.35137	1.67151	-1.67875	3.34067e-08	7.37529e-07	yes
XLOC_000027	Gdap1	chr1:17135453-17154351	0.179671	3.98451	4.47097	6.66134e-16	4.53753e-14	yes
XLOC_000031	Tfap2b	chr1:19198994-19228815	1.83156	0.403969	-2.18075	9.88822e-11	3.32053e-09	yes
XLOC_000049	Col9a1	chr1:24184448-24259577	1.00395	0.119032	-3.07627	1.34957e-06	2.11566e-05	yes
XLOC_000059	Imp4	chr1:34496662-34507025	33.4592	19.1049	-0.808457	0.000149611	0.00132948	yes
XLOC_000065	Plekhb2	chr1:34906803-34936430	4.5819	7.04912	0.621498	0.0103191	0.0452193	yes
XLOC_000066	Hs6st1	chr1:36125244-36163291	13.5979	9.03535	-0.589728	0.00133196	0.00849837	yes
XLOC_000069	Cnnm3	chr1:36568720-36585082	7.38115	5.1134	-0.529563	0.00734332	0.0345352	yes
XLOC_000070	Cox5b	chr1:36748331-36750233	95.8106	54.1608	-0.822935	2.34649e-05	0.000267187	yes
XLOC_000082	Rpl31	chr1:39424671-39535592	837.384	510.019	-0.71534	0.000113057	0.00105245	yes
XLOC_000083	D1Bwg0212e	chr1:39592646-39603722	16.8798	9.34019	-0.853775	3.27202e-06	4.64957e-05	yes
XLOC_000094	-	chr1:42752409-42753517	0.0780992	5.49919	6.13777	3.62938e-05	0.000391601	yes
XLOC_000095	Pou3f3	chr1:42753990-42770450	0.597749	38.8749	6.02315	0	0	yes
XLOC_000105	Col3a1	chr1:45368382-45406551	0.0853897	2.31603	4.76145	4.52494e-11	1.5863e-09	yes
XLOC_000106	Wdr75	chr1:45852345-45880458	36.0225	20.4782	-0.814805	5.14459e-07	8.90349e-06	yes
XLOC_000110	Stat4	chr1:52065087-52168086	0.427766	5.06932	3.5669	1.89537e-12	8.2453e-11	yes
XLOC_000111	Stat1	chr1:52176281-52218897	0.838774	2.1139	1.33356	2.32163e-05	0.000264829	yes
XLOC_000119	Hspe1	chr1:55144991-55148161	794.508	331.45	-1.26127	9.32587e-15	5.47566e-13	yes
XLOC_000135	Ndufb3	chr1:58643442-58652792	46.4534	27.3648	-0.763464	0.00103042	0.00688602	yes
XLOC_000139	Stradb	chr1:59030414-59051965	2.15414	3.81051	0.822872	0.00719377	0.0340242	yes
XLOC_000141	Fzd7	chr1:59538990-59543799	25.2255	10.8851	-1.21253	1.85407e-13	9.33916e-12	yes
XLOC_000143	Nop58	chr1:59741849-59768354	128.504	89.9822	-0.5141	0.00161893	0.00998325	yes
XLOC_000146	Bmpr2	chr1:59821120-59934510	9.45626	23.6264	1.32106	5.28614e-09	1.33041e-07	yes
XLOC_000156	Pard3b	chr1:61685397-62688862	0.895378	2.37452	1.40707	2.66295e-05	0.000298428	yes
XLOC_000157	Nrp2	chr1:62749890-62865266	13.2808	1.49552	-3.15062	0	0	yes
XLOC_000159	Eef1b2	chr1:63223404-63227060	237.999	107.903	-1.14122	5.92548e-12	2.36784e-10	yes
XLOC_000161	Zdbf2	chr1:63319842-63361155	9.81869	13.5649	0.466272	0.00397035	0.0209646	yes
XLOC_000162	Adam23	chr1:63492477-63643089	1.94501	3.5831	0.881426	0.00422949	0.0220891	yes
XLOC_000163	Fastkd2	chr1:63777149-63815841	9.21528	5.87297	-0.649936	0.00118351	0.00771319	yes
XLOC_000166	Ccnyl1	chr1:64737669-64772220	16.7051	11.8888	-0.490686	0.00715851	0.0338742	yes
XLOC_000170	Mtap2	chr1:66221897-66489160	3.94531	22.4079	2.50579	0	0	yes
XLOC_000174	Spag16	chr1:69873561-70771706	1.36317	0.529643	-1.36387	0.000134261	0.00121336	yes
XLOC_000176	Atic	chr1:71603729-71625977	86.6487	34.3803	-1.3336	0	0	yes
XLOC_000182	Rpl37a	chr1:72757833-72760387	904.089	518.738	-0.801458	6.42502e-07	1.09123e-05	yes
XLOC_000183	Igfbp2	chr1:72870446-72899059	90.1452	54.4219	-0.728062	6.26565e-05	0.000627582	yes
XLOC_000187	Cxcr2	chr1:74200567-74207820	4.26648	2.55925	-0.737324	0.00236055	0.0136877	yes
XLOC_000193	Ctdsp1	chr1:74438182-74443859	11.4144	7.30836	-0.643234	0.00158888	0.0098264	yes
XLOC_000199	Stk36	chr1:74648028-74683770	1.30441	2.36479	0.85832	0.00301373	0.0167642	yes
XLOC_000211	Speg	chr1:75371871-75428881	6.91955	1.61379	-2.10023	5.26782e-08	1.1241e-06	yes
XLOC_000219	Sgpp2	chr1:78306920-78485468	2.61292	0.450184	-2.53708	0.00139025	0.0088232	yes
XLOC_000238	Itm2c	chr1:87791084-87805273	9.01743	5.64094	-0.676782	0.00922229	0.0415698	yes
XLOC_000244	B3gnt7	chr1:88199795-88203880	1.2943	0.452829	-1.51513	0.00153022	0.00954072	yes
XLOC_000247	Ptma	chr1:88423310-88427273	1845.8	1032.36	-0.8383	0.000140952	0.00126606	yes
XLOC_000254	Eif4e2	chr1:89110488-89137063	25.8128	17.9048	-0.52774	0.00988972	0.0438089	yes
XLOC_000273	Cxcr7	chr1:92100577-92112863	1.18421	2.44015	1.04304	0.0039647	0.0209521	yes
XLOC_000277	Lrrfip1	chr1:92895303-93025521	12.8874	6.18747	-1.05854	5.45802e-07	9.38652e-06	yes
XLOC_000293	Gpc1	chr1:94728262-94756777	9.15225	20.4941	1.16301	2.20967e-08	5.02318e-07	yes
XLOC_000308	Ing5	chr1:95700541-95718677	12.797	6.96427	-0.877757	4.10918e-07	7.30305e-06	yes
XLOC_000321	Cdh20	chr1:106665395-106892058	7.89182	1.66195	-2.24748	0	0	yes
XLOC_000325	Phlpp1	chr1:108068445-108290822	4.91293	9.9505	1.01818	3.62654e-08	7.93322e-07	yes
XLOC_000334	Cdh7	chr1:111879377-112035578	0.497145	2.17002	2.12597	2.4028e-07	4.52232e-06	yes
XLOC_000336	Mki67ip	chr1:120218419-120230408	49.924	18.0541	-1.4674	0	0	yes
XLOC_000348	Mgat5	chr1:129101562-129384955	2.89631	4.99153	0.785264	0.00016265	0.00143404	yes
XLOC_000356	Yod1	chr1:132585619-132625830	1.57993	2.56955	0.701651	0.00398214	0.0210064	yes
XLOC_000381	Lrrn2	chr1:134776931-134836582	0.319389	1.64223	2.36227	0.000156393	0.00138524	yes
XLOC_000382	Pik3c2b	chr1:134942588-135005308	3.37584	10.3399	1.61491	2.22045e-16	1.5978e-14	yes
XLOC_000384	Plekha6	chr1:135142673-135200012	1.12904	3.80199	1.75166	3.17802e-09	8.31019e-08	yes
XLOC_000399	Kdm5b	chr1:136456754-136529455	25.7852	17.0855	-0.593766	0.000172634	0.00149723	yes
XLOC_000403	Arl8a	chr1:137043410-137052845	2.73047	7.24884	1.4086	1.30223e-05	0.000158865	yes
XLOC_000412	Kif21b	chr1:138027977-138075276	2.04546	4.99034	1.28671	6.76977e-08	1.40087e-06	yes
XLOC_000418	-	chr1:139795071-139831817	0.182403	1.42185	2.96257	6.12785e-06	8.05943e-05	yes
XLOC_000423	Zbtb41	chr1:141318959-141349584	4.10018	6.20941	0.598771	0.000372407	0.00292022	yes
XLOC_000424	Aspm	chr1:141351349-141390665	15.8185	24.2516	0.616467	0.000119468	0.00110151	yes
XLOC_000428	Glrx2	chr1:145586478-145596808	3.43145	10.6049	1.62784	4.55636e-13	2.17371e-11	yes
XLOC_000443	Nmnat2	chr1:154802147-154966391	7.5849	2.45517	-1.6273	0.000302249	0.00243491	yes
XLOC_000445	Rgs8	chr1:155500166-155544795	0.535805	6.18906	3.52994	0	0	yes
XLOC_000446	Rgs16	chr1:155587482-155592598	0.95049	6.34108	2.73799	1.23138e-10	4.06376e-09	yes
XLOC_000447	Rnasel	chr1:155596555-155611351	0.196426	2.24142	3.51235	1.76542e-10	5.67932e-09	yes
XLOC_000458	2810025M15Rik	chr1:159064317-159350367	43.286	23.5872	-0.875899	0.00832695	0.0382955	yes
XLOC_000461	Astn1	chr1:160292434-160621917	3.70677	10.4197	1.49107	6.66134e-16	4.53753e-14	yes
XLOC_000467	Mrps14	chr1:162125390-162131317	19.5493	10.3473	-0.917869	2.95728e-07	5.45331e-06	yes
XLOC_000488	Slc19a2	chr1:166179185-166195499	0.844326	2.54555	1.5921	6.50985e-06	8.50547e-05	yes
XLOC_000489	4930455F23Rik	chr1:166205728-166217978	4.14201	6.97791	0.752464	0.0031769	0.017494	yes
XLOC_000493	Gpr161	chr1:167212251-167257547	3.15338	4.69832	0.575246	0.00344556	0.0186864	yes
XLOC_000500	Ildr2	chr1:168184269-168246963	12.5851	20.9514	0.735327	4.3871e-06	5.98527e-05	yes
XLOC_000502	Fam78b	chr1:168931547-169021433	3.38867	1.98972	-0.768151	0.00508957	0.0256976	yes
XLOC_000503	Tmco1	chr1:169238800-169264109	13.2771	5.53196	-1.26307	4.56524e-13	2.17371e-11	yes
XLOC_000504	Aldh9a1	chr1:169280121-169298661	17.4183	11.8531	-0.55534	0.00586689	0.0287502	yes
XLOC_000522	Pfdn2	chr1:173275829-173288301	106.51	51.4439	-1.04992	1.65988e-08	3.8746e-07	yes
XLOC_000527	F11r	chr1:173367691-173394724	3.89951	0.393585	-3.30855	2.22045e-16	1.5978e-14	yes
XLOC_000541	Igsf9	chr1:174412343-174429008	8.83673	5.4916	-0.686285	0.000965414	0.00652046	yes
XLOC_000542	Tagln2	chr1:174430376-174437506	21.553	12.3235	-0.806476	0.0001717	0.00149454	yes
XLOC_000567	Fmn2	chr1:176431955-176752860	2.81828	4.23613	0.587929	0.00396621	0.0209542	yes
XLOC_000571	Sdccag8	chr1:178744942-178950563	2.65868	5.17031	0.959539	0.000517415	0.00383285	yes
XLOC_000572	Zfp238	chr1:179373001-179381074	5.45313	11.3638	1.05929	3.50481e-07	6.3408e-06	yes
XLOC_000581	Cdc42bpa	chr1:181890570-182126151	9.18478	14.9764	0.705373	0.000169579	0.00148012	yes
XLOC_000582	Itpkb	chr1:182257099-182355458	0.385338	1.07286	1.47726	0.000622695	0.00449944	yes
XLOC_000586	BC031781	chr1:182781281-182798245	22.0789	11.1882	-0.980685	5.65737e-09	1.41738e-07	yes
XLOC_000594	Srp9	chr1:184054867-184062546	32.1962	22.3213	-0.528469	0.00309876	0.0171574	yes
XLOC_000598	Susd4	chr1:184695036-184826721	2.19013	1.21547	-0.849506	0.0115702	0.0495115	yes
XLOC_000600	Dusp10	chr1:185858339-185899515	0.385617	1.49901	1.95877	0.000758082	0.00533668	yes
XLOC_000606	Bpnt1	chr1:187156037-187183135	10.3751	4.844	-1.09885	3.66944e-06	5.14932e-05	yes
XLOC_000615	Ptpn14	chr1:191552146-191700572	6.89564	2.5049	-1.46093	2.22045e-16	1.5978e-14	yes
XLOC_000624	Lpgat1	chr1:193541902-193608134	3.51519	13.8344	1.97659	0	0	yes
XLOC_000626	Slc30a1	chr1:193717950-193737126	5.32592	3.4764	-0.615439	0.00136577	0.00868515	yes
XLOC_000632	A130010J15Rik	chr1:194999662-195027740	3.67744	2.18107	-0.753667	0.00565277	0.0279225	yes
XLOC_000635	Cd34	chr1:196765014-196803153	0.408343	1.45835	1.83648	0.0094174	0.0422618	yes
XLOC_000640	Mrpl15	chr1:4763278-4775807	32.2994	15.7593	-1.03531	0.00601942	0.0293474	yes
XLOC_000645	Mybl1	chr1:9657521-9690290	1.67146	3.46973	1.05371	3.77152e-05	0.000405111	yes
XLOC_000655	Tram1	chr1:13554782-13579945	34.0805	15.8427	-1.10513	7.99671e-12	3.08599e-10	yes
XLOC_000656	Lactb2	chr1:13614948-13650623	5.45693	3.02803	-0.849712	0.00122321	0.00791328	yes
XLOC_000658	Eya1	chr1:14159033-14300336	4.94979	1.70167	-1.54042	5.12571e-09	1.29949e-07	yes
XLOC_000663	Rpl7	chr1:16091375-16094514	921.249	436.267	-1.07838	1.6644e-09	4.5577e-08	yes
XLOC_000664	Stau2	chr1:16218890-16509383	6.32583	16.8636	1.41458	9.86935e-11	3.32002e-09	yes
XLOC_000666	Tceb1	chr1:16628436-16647209	49.9641	28.0732	-0.831696	5.69304e-05	0.000580248	yes
XLOC_000679	Rims1	chr1:22278502-22812563	1.65377	0.773617	-1.09607	0.00934349	0.0420216	yes
XLOC_000686	Bai3	chr1:25124278-25886552	0.556486	1.80705	1.69922	4.96027e-07	8.61566e-06	yes
XLOC_000691	Ptp4a1	chr1:30997147-31006605	84.1867	58.6522	-0.521407	0.00218352	0.0127969	yes
XLOC_000698	Bag2	chr1:33802328-33814595	10.8001	6.71555	-0.685463	0.00545038	0.027154	yes
XLOC_000706	Fam168b	chr1:34869971-34899895	23.9622	46.1488	0.945533	1.05345e-08	2.53957e-07	yes
XLOC_000717	6330578E17Rik	chr1:37473929-37486948	48.4637	28.1204	-0.785288	6.2331e-07	1.06051e-05	yes
XLOC_000718	Mgat4a	chr1:37495995-37593213	1.42754	2.51291	0.815829	0.000633481	0.00456359	yes
XLOC_000721	Tsga10	chr1:37811620-37922045	2.23261	5.44429	1.28601	7.23266e-08	1.49021e-06	yes
XLOC_000722	Mitd1	chr1:37935479-37947256	8.40223	4.78003	-0.813752	0.00427059	0.0222431	yes
XLOC_000728	Lonrf2	chr1:38850449-38878110	2.87338	4.92168	0.7764	0.000486557	0.00364485	yes
XLOC_000740	2610017I09Rik	chr1:42705043-42751670	0.956192	32.1328	5.0706	2.84898e-10	8.9251e-09	yes
XLOC_000746	Kdelc1	chr1:44161960-44175795	14.8822	9.6153	-0.630179	0.00134474	0.00856563	yes
XLOC_000749	Col5a2	chr1:45431175-45560127	0.316784	2.18619	2.78685	4.24771e-13	2.03773e-11	yes
XLOC_000753	Slc39a10	chr1:46864388-46910354	47.5768	33.6398	-0.500087	0.00173313	0.0105515	yes
XLOC_000755	Obfc2a	chr1:51524535-51535245	6.94582	1.5395	-2.17368	4.44089e-16	3.1023e-14	yes
XLOC_000756	Myo1b	chr1:51806609-51988466	16.704	23.3053	0.480468	0.00266611	0.0151745	yes
XLOC_000769	Pgap1	chr1:54529843-54614528	5.5425	8.129	0.552542	0.000631515	0.00455457	yes
XLOC_000770	Ankrd44	chr1:54702183-54983231	1.14076	2.42101	1.08562	2.3179e-05	0.000264562	yes
XLOC_000772	Hspd1	chr1:55134677-55144776	715.207	414.991	-0.785281	0.000240956	0.00200093	yes
XLOC_000788	Als2cr4	chr1:59157436-59176940	10.2219	6.32761	-0.691931	0.00198801	0.0117934	yes
XLOC_000790	Sumo1	chr1:59696277-59727678	199.536	119.713	-0.737073	1.95527e-05	0.000227374	yes
XLOC_000792	Wdr12	chr1:60131622-60207878	20.7162	12.3775	-0.743037	0.000131917	0.00119613	yes
XLOC_000805	Fzd5	chr1:64777131-64784324	33.7561	2.07709	-4.02251	0	0	yes
XLOC_000806	Plekhm3	chr1:64835694-65003398	2.54233	1.22894	-1.04873	1.35478e-06	2.12035e-05	yes
XLOC_000814	Idh1	chr1:65205189-65233053	18.1655	47.925	1.39957	1.33227e-15	8.64438e-14	yes
XLOC_000816	Acadl	chr1:66877426-66909841	2.63134	10.3292	1.97286	2.23599e-12	9.5109e-11	yes
XLOC_000819	Erbb4	chr1:68086539-69154633	0.221488	1.5369	2.79472	3.85579e-07	6.90399e-06	yes
XLOC_000823	Fn1	chr1:71632092-71699745	15.4823	28.5921	0.884997	3.32029e-08	7.33876e-07	yes
XLOC_000825	Mreg	chr1:72205806-72258881	1.67305	0.721279	-1.21385	0.00120069	0.00780389	yes
XLOC_000826	Pecr	chr1:72304343-72330888	5.84629	2.19443	-1.41367	0.000201688	0.00171731	yes
XLOC_000829	Igfbp5	chr1:72904507-72921439	41.0101	25.4717	-0.687082	5.14138e-05	0.000532527	yes
XLOC_000835	Aamp	chr1:74326413-74331312	20.5919	12.336	-0.739197	0.000478345	0.00359199	yes
XLOC_000846	Nhej1	chr1:75013919-75121800	8.16646	4.19882	-0.959726	0.00731354	0.034446	yes
XLOC_000849	Abcb6	chr1:75168206-75176857	1.6836	4.59081	1.4472	2.83434e-05	0.000315971	yes
XLOC_000861	Pax3	chr1:78097841-78193711	4.09794	0.37573	-3.44713	1.44329e-14	8.27126e-13	yes
XLOC_000862	Farsb	chr1:78306920-78485468	58.3472	36.1216	-0.691801	3.93387e-05	0.000419722	yes
XLOC_000870	Irs1	chr1:82229679-82288014	2.9734	6.94196	1.22323	1.94971e-11	7.16302e-10	yes
XLOC_000876	Dner	chr1:84366413-84692796	0.224473	1.94195	3.1129	1.58428e-07	3.08806e-06	yes
XLOC_000885	Ncl	chr1:88241293-88256030	269.352	145.579	-0.887696	0.000221594	0.00185788	yes
XLOC_000910	Hes6	chr1:93308059-93309799	3.43007	13.3193	1.95721	8.76708e-08	1.77938e-06	yes
XLOC_000913	Ndufa10	chr1:94336061-94370335	52.525	77.8538	0.567761	0.00665026	0.0318152	yes
XLOC_000921	Kif1a	chr1:94912032-94998442	6.71327	15.2846	1.18699	9.62896e-12	3.64966e-10	yes
XLOC_000942	Pign	chr1:107414998-107560253	6.57949	4.38744	-0.584595	0.000931666	0.00634176	yes
XLOC_000944	Bcl2	chr1:108434755-108610867	1.53102	2.97556	0.958672	0.00157916	0.00978208	yes
XLOC_000945	Kdsr	chr1:108616986-108656319	2.07949	1.26681	-0.715027	0.00579014	0.0284435	yes
XLOC_000962	Tmem37	chr1:121963953-121970357	2.20274	0.222551	-3.3071	6.646e-05	0.000660494	yes
XLOC_000968	Ddx18	chr1:123450411-123464557	67.2405	33.6668	-0.998004	5.26867e-10	1.57329e-08	yes
XLOC_000972	Nckap5	chr1:127810102-128727209	0.280437	1.40405	2.32384	2.04995e-07	3.91208e-06	yes
XLOC_000973	Tmem163	chr1:129386918-129574598	0.393842	3.7341	3.24507	1.3294e-08	3.15317e-07	yes
XLOC_000979	Dars	chr1:130260283-130313993	59.1837	40.4945	-0.547475	0.000574739	0.00419568	yes
XLOC_000980	Cxcr4	chr1:130484775-130488876	8.15017	3.205	-1.3465	7.43131e-08	1.52621e-06	yes
XLOC_000995	Mfsd4	chr1:133904181-133964639	3.81984	8.0373	1.0732	9.88448e-07	1.60067e-05	yes
XLOC_000996	Cdk18	chr1:134010123-134036262	1.08607	0.360109	-1.59261	0.00115242	0.00753881	yes
XLOC_001002	Sox13	chr1:135278785-135320853	12.1338	5.7935	-1.06653	2.22231e-06	3.28982e-05	yes
XLOC_001003	Snrpe	chr1:135500447-135506857	229.715	120.17	-0.934768	1.86381e-08	4.28789e-07	yes
XLOC_001009	Btg2	chr1:135971441-135975732	1.7712	7.00305	1.98325	1.24367e-12	5.56194e-11	yes
XLOC_001019	Rnpep	chr1:137159275-137180661	8.04681	5.01806	-0.681286	0.0065513	0.0314046	yes
XLOC_001020	Timm17a	chr1:137198111-137210314	73.9679	41.4689	-0.834869	1.80822e-06	2.75128e-05	yes
XLOC_001033	Nek7	chr1:140380716-140516318	2.69742	9.94783	1.8828	5.04041e-14	2.71771e-12	yes
XLOC_001035	Lhx9	chr1:140721762-140744423	0.215405	5.34189	4.63223	0.000105131	0.000984975	yes
XLOC_001044	Trove2	chr1:145597920-145624181	10.4877	15.1892	0.534346	0.000775639	0.0054343	yes
XLOC_001058	Tsen15	chr1:154217865-154233812	24.1605	12.9779	-0.896592	2.06337e-05	0.000238959	yes
XLOC_001062	Lamc1	chr1:155066051-155179916	14.2698	8.90279	-0.680639	2.89699e-05	0.00032183	yes
XLOC_001065	Npl	chr1:155350145-155396844	1.95265	5.52075	1.49943	0.00241739	0.0139708	yes
XLOC_001071	Ier5	chr1:156942077-156946766	2.34027	8.32572	1.8309	7.26796e-12	2.8354e-10	yes
XLOC_001074	Xpr1	chr1:157122786-157264574	7.31147	21.2675	1.54042	0	0	yes
XLOC_001077	Cep350	chr1:157691959-157820544	3.87395	5.85297	0.595364	0.000573083	0.00418519	yes
XLOC_001082	Soat1	chr1:158354329-158404459	27.1512	7.10877	-1.93334	0	0	yes
XLOC_001083	Tor3a	chr1:158581739-158604470	2.62081	0.639756	-2.03442	4.56397e-08	9.82666e-07	yes
XLOC_001087	Rasal2	chr1:159064317-159350367	6.04953	9.01285	0.575161	0.000507787	0.00377458	yes
XLOC_001092	Cacybp	chr1:162132497-162143023	83.2951	41.9507	-0.989538	6.24355e-10	1.83294e-08	yes
XLOC_001093	Rabgap1l	chr1:162149019-162723069	1.33063	2.60381	0.968511	0.0016086	0.00992593	yes
XLOC_001099	Prdx6	chr1:163170242-163181297	63.6621	33.2091	-0.938858	5.05782e-09	1.28397e-07	yes
XLOC_001104	Mettl13	chr1:164462253-164478567	7.12395	4.15131	-0.779111	0.0029696	0.0165717	yes
XLOC_001113	Prrx1	chr1:165175249-165243781	1.07218	4.98557	2.21721	4.72955e-14	2.5573e-12	yes
XLOC_001116	BC055324	chr1:165860194-165924912	20.5593	14.3146	-0.522302	0.00443593	0.0229419	yes
XLOC_001123	Sft2d2	chr1:167104409-167124564	5.77414	3.1796	-0.860762	1.88948e-05	0.000220393	yes
XLOC_001124	Tiprl	chr1:167142416-167167089	11.4913	7.81244	-0.55669	0.00114286	0.00749157	yes
XLOC_001128	Pou2f1	chr1:167718811-167932765	16.264	5.7522	-1.4995	0	0	yes
XLOC_001132	Pogk	chr1:168309297-168339959	2.54248	17.5122	2.78405	0	0	yes
XLOC_001140	Pbx1	chr1:170049494-170362389	33.3943	62.3664	0.901167	5.40592e-07	9.31365e-06	yes
XLOC_001143	Hsd17b7	chr1:171879667-171899336	5.14108	9.2589	0.848768	4.0883e-06	5.62171e-05	yes
XLOC_001150	Dusp12	chr1:172804318-172815671	12.8874	7.07245	-0.865674	0.000850025	0.00588439	yes
XLOC_001169	Nhlh1	chr1:173982422-173987727	0	3.85095	1.79769e+308	1.04401e-18	8.05782e-17	yes
XLOC_001171	Pea15a	chr1:174126859-174136912	25.5866	47.2849	0.885989	9.31595e-08	1.88098e-06	yes
XLOC_001202	Cep170	chr1:178663783-178744332	12.1481	23.7985	0.970134	2.06832e-08	4.71868e-07	yes
XLOC_001205	Akt3	chr1:178952245-179188349	25.8628	49.3962	0.933522	1.14691e-05	0.000142091	yes
XLOC_001207	Adss	chr1:179693308-179726640	68.2741	41.1978	-0.728771	3.79615e-06	5.28837e-05	yes
XLOC_001211	Ahctf1	chr1:181675034-181734146	30.3281	22.6702	-0.419856	0.00884329	0.040271	yes
XLOC_001215	6330403A02Rik	chr1:182361868-182413635	0.211138	1.63866	2.95626	5.93426e-08	1.24837e-06	yes
XLOC_001217	H3f3a	chr1:182732698-182743734	611.109	410.146	-0.575291	0.000818894	0.00569566	yes
XLOC_001225	Degs1	chr1:184205900-184212890	20.6474	11.0317	-0.904302	1.90021e-06	2.87525e-05	yes
XLOC_001227	Capn2	chr1:184397389-184447614	8.11287	17.3619	1.09764	6.37304e-09	1.59044e-07	yes
XLOC_001240	Lyplal1	chr1:187911547-187941189	11.3837	6.41518	-0.827409	0.000447895	0.00339262	yes
XLOC_001242	Rrp15	chr1:188544964-188573237	27.7145	13.1318	-1.07757	1.26839e-07	2.5211e-06	yes
XLOC_001256	Nenf	chr1:193130675-193141997	11.5343	5.50684	-1.06663	0.00365389	0.0195963	yes
XLOC_001257	Ppp2r5a	chr1:193149843-193220920	12.8604	6.9722	-0.883253	0.000116482	0.00107866	yes
XLOC_001262	Rcor3	chr1:193922474-193974907	1.09128	2.96715	1.44305	6.17467e-05	0.000620742	yes
XLOC_001264	Sertad4	chr1:194670681-194681946	7.34422	2.31536	-1.66537	1.35025e-12	5.96887e-11	yes
XLOC_001277	-	chr1:3189898-3197031	0.329899	1.07059	1.69831	1.17633e-05	0.000145359	yes
XLOC_001297	-	chr1:9532884-9535257	2.68807	0.849849	-1.66129	1.91853e-06	2.89819e-05	yes
XLOC_001326	-	chr1:23268440-23279057	0.746157	1.30179	0.802948	0.00179891	0.0108965	yes
XLOC_001348	-	chr1:34852121-34858444	0.440463	1.56885	1.83261	3.32495e-07	6.06701e-06	yes
XLOC_001403	-	chr1:60762081-60762567	2.75375	0.466376	-2.56183	0.0050687	0.0256192	yes
XLOC_001426	-	chr1:78211538-78213525	1.41335	0.11227	-3.65408	3.21053e-07	5.87503e-06	yes
XLOC_001524	-	chr1:139795071-139831817	0.388765	3.13118	3.00974	2.07168e-13	1.03535e-11	yes
XLOC_001526	-	chr1:139795071-139831817	0.295325	2.04577	2.79227	1.86539e-06	2.82479e-05	yes
XLOC_001527	-	chr1:139795071-139831817	0.329603	1.71421	2.37874	0.000649553	0.00464963	yes
XLOC_001535	-	chr1:139831936-139858016	0.307986	1.24507	2.01529	2.22045e-16	1.5978e-14	yes
XLOC_001536	-	chr1:139858086-139862033	0.231804	1.04696	2.17523	0.000128335	0.00116863	yes
XLOC_001597	-	chr1:173004427-173004826	14.1946	5.34984	-1.40777	0.00109288	0.00723582	yes
XLOC_001626	-	chr1:179915083-179916961	1.22882	3.37255	1.45656	0.00031644	0.00253748	yes
XLOC_001672	Cnksr3	chr10:3134303-3228837	6.7013	3.8574	-0.796812	0.000484516	0.00363413	yes
XLOC_001676	Fbxo5	chr10:4541075-4547387	30.2333	21.4043	-0.498241	0.00474714	0.0242178	yes
XLOC_001679	Rmnd1	chr10:5914149-5958178	5.68371	2.61591	-1.11952	0.000645305	0.00462441	yes
XLOC_001685	Nup43	chr10:7387301-7398684	48.5896	27.9552	-0.79753	4.18903e-06	5.75195e-05	yes
XLOC_001686	Lats1	chr10:7401006-7436259	10.2333	13.864	0.438071	0.0115871	0.0495616	yes
XLOC_001697	Sf3b5	chr10:12728255-12728989	64.787	40.6138	-0.673733	0.00081193	0.00565339	yes
XLOC_001698	Plagl1	chr10:12810593-12851501	2.80815	30.215	3.42758	0	0	yes
XLOC_001700	Adat2	chr10:13243647-13284471	8.02666	3.70076	-1.11698	0.00184017	0.0110902	yes
XLOC_001704	Cited2	chr10:17443033-17445480	29.3082	16.2739	-0.84875	1.74757e-06	2.66961e-05	yes
XLOC_001715	Mtap7	chr10:19868725-20001396	2.5855	0.893959	-1.53216	1.7132e-07	3.30901e-06	yes
XLOC_001724	Sgk1	chr10:21601989-21719708	2.41628	0.859095	-1.4919	0.000335623	0.00266011	yes
XLOC_001749	Samd3	chr10:25949448-25992708	0.0215841	1.77192	6.35919	1.57684e-05	0.000187934	yes
XLOC_001750	Arhgap18	chr10:26492317-26638454	1.57206	3.96965	1.33636	4.29026e-07	7.58263e-06	yes
XLOC_001753	6330407J23Rik,9330159F19Rik	chr10:28863249-28950585	6.00119	10.6674	0.829891	0.000382221	0.00298373	yes
XLOC_001768	Fyn	chr10:39089604-39285180	6.32558	9.79901	0.631438	0.00279205	0.0157669	yes
XLOC_001771	Cdk19	chr10:40069113-40203624	1.60185	3.58518	1.16231	5.34422e-07	9.23229e-06	yes
XLOC_001779	Cd164	chr10:41239305-41250848	73.1179	44.0604	-0.730744	3.97462e-06	5.49301e-05	yes
XLOC_001788	Bend3	chr10:43198945-43235223	22.4143	15.5522	-0.527302	0.000943608	0.00639575	yes
XLOC_001809	Nus1	chr10:52137352-52159998	21.1305	15.3126	-0.464607	0.00343206	0.0186258	yes
XLOC_001810	Slc35f1	chr10:52410306-52831428	5.10743	15.6291	1.61357	0	0	yes
XLOC_001816	Gja1	chr10:56097105-56110225	112.015	23.0779	-2.2791	0	0	yes
XLOC_001819	Fabp7	chr10:57504728-57508256	4.48865	190.471	5.40715	0	0	yes
XLOC_001820	Smpdl3a	chr10:57514349-57531636	0.100443	2.10322	4.38815	1.7269e-05	0.000204167	yes
XLOC_001821	Gcc2	chr10:57718273-57768340	7.61708	15.4423	1.01958	4.2479e-10	1.28857e-08	yes
XLOC_001828	P4ha1	chr10:58786043-58837833	7.53075	4.41785	-0.769448	0.000186149	0.00159351	yes
XLOC_001830	Micu1	chr10:59165382-59326870	2.43459	4.97715	1.03164	0.000690154	0.0048963	yes
XLOC_001833	Spock2	chr10:59569004-59597910	0.309653	1.35398	2.12848	1.04474e-05	0.000130191	yes
XLOC_001834	Psap	chr10:59740375-59765349	10.3034	15.5713	0.595775	0.00530689	0.0265428	yes
XLOC_001838	Pcbd1	chr10:60552090-60557077	14.4171	8.55209	-0.753436	0.00779285	0.0363635	yes
XLOC_001842	Lrrc20	chr10:60938580-61044976	1.99195	3.53087	0.825847	0.0108287	0.0469791	yes
XLOC_001844	Ppa1	chr10:61111368-61136913	144.6	94.9652	-0.606597	0.00012369	0.00113334	yes
XLOC_001858	Pbld1	chr10:62524364-62540284	6.54481	4.15084	-0.656947	0.0112165	0.0482788	yes
XLOC_001866	Tmem26	chr10:68186493-68245402	0.245587	1.00991	2.03992	2.08375e-05	0.000240997	yes
XLOC_001869	Ccdc6	chr10:69559868-69655948	25.9434	18.3985	-0.495779	0.00172321	0.0104979	yes
XLOC_001875	Pcdh15	chr10:73284614-74112543	1.18847	0.0549333	-4.43528	2.71116e-13	1.34791e-11	yes
XLOC_001884	Snrpd3	chr10:74980388-75000119	30.1405	12.8089	-1.23456	2.56182e-05	0.000288785	yes
XLOC_001891	Zfp280b	chr10:75495356-75505859	14.1712	8.98956	-0.656641	0.000202772	0.001725	yes
XLOC_001897	Lss	chr10:75994371-76024971	7.69874	13.2083	0.778746	0.000288564	0.00234042	yes
XLOC_001901	Slc19a1	chr10:76495483-76513177	6.40571	3.75421	-0.770849	0.00644387	0.0309516	yes
XLOC_001922	Cstb	chr10:77888414-77890367	38.0125	21.5321	-0.819982	0.000401139	0.0031023	yes
XLOC_001938	Cdc34	chr10:79144939-79151143	42.6499	24.6655	-0.790048	3.86347e-05	0.000413594	yes
XLOC_001940	Bsg	chr10:79167102-79174724	147.142	72.2846	-1.02545	2.43744e-10	7.71159e-09	yes
XLOC_001944	Palm	chr10:79256316-79283641	8.38823	12.7644	0.605682	0.00623719	0.0301708	yes
XLOC_001946	Ptbp1	chr10:79314121-79337379	260.044	143.615	-0.856543	1.13448e-06	1.81261e-05	yes
XLOC_001951	Arid3a	chr10:79389816-79417757	7.29123	2.7357	-1.41425	1.94644e-12	8.44827e-11	yes
XLOC_001952	Wdr18	chr10:79422896-79432630	14.5408	8.84794	-0.716689	0.000500924	0.00373226	yes
XLOC_001956	Hmha1	chr10:79479416-79494216	1.68807	0.575343	-1.55288	0.000191441	0.00163515	yes
XLOC_001967	Rps15	chr10:79755172-79756859	1101.48	493.758	-1.15757	8.07354e-13	3.70589e-11	yes
XLOC_001968	Apc2	chr10:79763836-79783293	1.60826	4.47182	1.47536	2.75762e-08	6.1663e-07	yes
XLOC_001972	Adat3,Scamp4	chr10:80065624-80078528	23.3848	13.0583	-0.840603	0.000177637	0.00152953	yes
XLOC_001978	Oaz1	chr10:80289400-80292035	552.675	364.471	-0.600627	0.000245573	0.00203485	yes
XLOC_001983	Thop1	chr10:80532766-80545105	37.7977	15.18	-1.31613	3.98672e-06	5.50193e-05	yes
XLOC_001997	Dohh	chr10:80847172-80852665	8.49533	4.44229	-0.935367	0.00425855	0.0221924	yes
XLOC_002000	Aes	chr10:81022304-81029109	2.55076	16.3765	2.68263	1.8876e-12	8.2302e-11	yes
XLOC_002012	Hcfc2	chr10:82161751-82204159	1.08386	3.11765	1.52428	0.000148991	0.0013252	yes
XLOC_002018	A230046K03Rik	chr10:83006685-83059218	17.9179	11.5841	-0.629257	7.24344e-05	0.00071247	yes
XLOC_002022	Rfx4	chr10:84218792-84369283	3.31484	9.65332	1.54209	1.42966e-11	5.33432e-10	yes
XLOC_002026	Pwp1	chr10:85334575-85351848	29.853	19.7061	-0.599238	0.000278404	0.0022657	yes
XLOC_002030	Timp3	chr10:85484673-85961641	4.66417	2.62359	-0.830079	0.00144759	0.00913562	yes
XLOC_002040	Nup37	chr10:87609736-87641140	32.37	15.561	-1.05673	3.24137e-08	7.19597e-07	yes
XLOC_002056	Ntn4	chr10:93103778-93209954	0.259048	3.47107	3.74409	3.71314e-06	5.19161e-05	yes
XLOC_002057	Usp44	chr10:93294299-93321141	16.2739	7.19712	-1.17707	3.4842e-07	6.32401e-06	yes
XLOC_002060	Ndufa12	chr10:93661753-93683693	42.803	69.706	0.703571	0.00105589	0.00702051	yes
XLOC_002066	Eea1	chr10:95403296-95508152	2.52532	3.66023	0.535472	0.00592053	0.0289537	yes
XLOC_002067	Btg1	chr10:96079634-96087661	4.91175	7.20554	0.552869	0.00550041	0.0273534	yes
XLOC_002093	Ccdc59	chr10:105200240-105285493	20.5295	12.811	-0.680313	0.0100644	0.044392	yes
XLOC_002097	Pawr	chr10:107769244-107851932	26.9852	17.9172	-0.590822	0.00101625	0.00680854	yes
XLOC_002099	E2f7	chr10:110182520-110224443	7.46084	10.8889	0.545442	0.00192611	0.0114853	yes
XLOC_002103	Nap1l1	chr10:110909994-110935206	1021.48	570.658	-0.839958	0.00604489	0.029441	yes
XLOC_002105	Phlda1	chr10:110943341-110945705	71.7726	1.71278	-5.38902	0	0	yes
XLOC_002106	Krr1	chr10:111409723-111434320	22.832	15.6742	-0.542669	0.000841188	0.00582954	yes
XLOC_002130	Tmbim4	chr10:119645881-119661953	20.3213	11.4763	-0.824326	0.000872784	0.00600286	yes
XLOC_002131	Llph	chr10:119664115-119669126	63.1595	32.6421	-0.952267	1.74784e-08	4.0503e-07	yes
XLOC_002136	Gns	chr10:120802145-120834306	14.2359	9.8253	-0.534959	0.00390202	0.0206779	yes
XLOC_002138	BC048403	chr10:121176992-121192766	3.09147	1.35792	-1.18689	0.000165816	0.00145457	yes
XLOC_002141	Ppm1h	chr10:122115817-122382849	1.81534	0.75581	-1.26414	5.74274e-05	0.00058469	yes
XLOC_002144	Lrig3	chr10:125403259-125452415	11.0371	1.47476	-2.90381	0	0	yes
XLOC_002152	B4galnt1	chr10:126602211-126609396	3.92254	0.909675	-2.10837	4.29905e-05	0.000454379	yes
XLOC_002157	R3hdm2	chr10:126827296-126936790	9.56522	15.5901	0.704757	0.000198788	0.00169488	yes
XLOC_002160	Stat6	chr10:127080041-127103759	1.65956	0.206065	-3.00963	1.10136e-08	2.65012e-07	yes
XLOC_002174	Naca	chr10:127472401-127485693	758.541	441.643	-0.780347	6.35109e-06	8.31332e-05	yes
XLOC_002175	Ptges3	chr10:127496037-127514310	319.785	198.223	-0.689978	9.26807e-05	0.000881272	yes
XLOC_002186	Cnpy2	chr10:127759514-127764243	60.5028	38.1595	-0.664961	0.000243352	0.0020182	yes
XLOC_002187	Cs	chr10:127774887-127799535	67.9009	101.486	0.579777	0.000275012	0.00224192	yes
XLOC_002190	Smarcc2	chr10:127896291-127927230	8.91253	23.876	1.42165	1.14797e-13	5.97101e-12	yes
XLOC_002195	Cd63	chr10:128345974-128349874	28.731	15.3707	-0.902423	3.95393e-05	0.000421628	yes
XLOC_002230	Akap12	chr10:5987067-6080212	16.5925	7.07969	-1.22877	1.32561e-12	5.9008e-11	yes
XLOC_002231	Mthfd1l	chr10:6179459-6373466	18.9011	11.4852	-0.718702	6.27182e-05	0.00062787	yes
XLOC_002232	Plekhg1	chr10:6379142-6606164	1.39545	3.23202	1.21171	7.71411e-07	1.28845e-05	yes
XLOC_002241	Samd5	chr10:9341703-9395006	0.698473	3.329	2.25281	2.02949e-12	8.76894e-11	yes
XLOC_002250	Ltv1	chr10:12898443-12912943	45.3857	34.0137	-0.416122	0.0110873	0.0478302	yes
XLOC_002251	Phactr2	chr10:12927522-13194202	4.13254	7.05801	0.772231	2.61669e-05	0.000294105	yes
XLOC_002256	Gje1	chr10:14425414-14478825	0.677034	1.78809	1.40112	0.0100388	0.0443157	yes
XLOC_002259	3110003A17Rik	chr10:17731066-17743058	66.7565	39.8939	-0.742741	4.17937e-05	0.000442708	yes
XLOC_002273	-	chr10:21774732-21778460	6.35293	2.54705	-1.3186	0.00659298	0.0315806	yes
XLOC_002278	Eya4	chr10:22822306-23069758	1.22833	3.65157	1.57182	1.46825e-05	0.000175869	yes
XLOC_002279	Rps12	chr10:23504988-23507015	923.905	264.182	-1.80621	0	0	yes
XLOC_002288	Enpp3	chr10:24492901-24556001	6.69475	0.72339	-3.21018	0	0	yes
XLOC_002294	L3mbtl3	chr10:25994266-26094991	4.11514	7.29291	0.825555	6.16485e-05	0.000620081	yes
XLOC_002300	Rspo3	chr10:29172912-29255673	1.17571	22.0488	4.2291	0	0	yes
XLOC_002302	Trmt11	chr10:30253136-30320555	3.91724	1.89218	-1.04978	0.000897403	0.00614788	yes
XLOC_002315	Rwdd1	chr10:33716360-33739422	37.9764	22.831	-0.734111	5.60932e-05	0.000572019	yes
XLOC_002319	Dse	chr10:33871195-33927357	4.85925	1.33801	-1.86065	1.27351e-11	4.77032e-10	yes
XLOC_002321	Marcks	chr10:36853048-36858732	36.2064	163.034	2.17086	0	0	yes
XLOC_002332	Gtf3c6,Rpf2	chr10:39943051-39977911	98.6543	63.2422	-0.641495	0.00414228	0.0217166	yes
XLOC_002343	Nr2e1	chr10:42281776-42303394	8.19678	48.2264	2.55669	0	0	yes
XLOC_002344	Sobp	chr10:42717654-42894336	1.75746	3.83051	1.12405	0.00743843	0.0349482	yes
XLOC_002348	Prdm1	chr10:44156980-44178493	1.66349	0.317328	-2.39017	3.3995e-13	1.66419e-11	yes
XLOC_002349	Lin28b	chr10:45096424-45190007	87.5036	32.3688	-1.43474	0	0	yes
XLOC_002351	Grik2	chr10:48817920-49508571	2.11772	4.81406	1.18474	2.86175e-05	0.000318654	yes
XLOC_002365	Serinc1	chr10:57235581-57252335	19.9134	28.4984	0.517139	0.00152126	0.00949719	yes
XLOC_002369	Sept10	chr10:58604264-58684595	11.3995	6.52616	-0.80467	0.000843939	0.00584437	yes
XLOC_002372	Ddit4	chr10:59412422-59414518	4.87672	2.7657	-0.818266	0.00944758	0.0423443	yes
XLOC_002376	Slc29a3	chr10:60174819-60215530	0.703722	3.07714	2.12851	8.22091e-11	2.79496e-09	yes
XLOC_002377	Unc5b	chr10:60225342-60294329	5.51438	3.25144	-0.762117	0.000239514	0.00199328	yes
XLOC_002382	Eif4ebp2	chr10:60891086-60915590	128.614	82.3786	-0.642706	0.00317805	0.0174953	yes
XLOC_002392	2510003E04Rik	chr10:62021217-62041205	6.16025	10.1801	0.724694	0.00101814	0.00681646	yes
XLOC_002393	Ddx21	chr10:62042994-62065046	60.1386	27.3786	-1.13524	9.04388e-13	4.11185e-11	yes
XLOC_002400	Sirt1	chr10:62781752-62801783	12.67	8.86522	-0.51519	0.00441291	0.0228429	yes
XLOC_002401	Lrrtm3	chr10:62892845-64466415	1.68225	0.168884	-3.31629	6.19504e-14	3.30305e-12	yes
XLOC_002405	Ado	chr10:67007258-67011703	12.3933	5.33386	-1.2163	5.12568e-12	2.07861e-10	yes
XLOC_002406	Zfp365	chr10:67348852-67375410	12.1675	2.57096	-2.24266	0	0	yes
XLOC_002407	Arid5b	chr10:67555271-67741539	1.53259	3.43155	1.16289	5.76213e-06	7.62217e-05	yes
XLOC_002411	Phyhipl	chr10:69903415-70062039	2.37442	3.82015	0.686055	0.00941898	0.0422618	yes
XLOC_002415	Tfam	chr10:70688208-70700792	20.9221	15.2475	-0.456456	0.00687979	0.0327741	yes
XLOC_002416	Ube2d1	chr10:70717727-70748010	52.0283	30.3723	-0.776543	1.9823e-05	0.000230378	yes
XLOC_002417	Cisd1	chr10:70793241-70807597	38.1294	22.3644	-0.769701	8.02478e-05	0.000779312	yes
XLOC_002425	Ddt	chr10:75233977-75236119	51.2315	28.6636	-0.837813	0.000172141	0.00149687	yes
XLOC_002430	Mif	chr10:75322097-75322995	1145.18	475.833	-1.26705	1.9984e-15	1.2666e-13	yes
XLOC_002435	Dip2a	chr10:75725793-75808036	0.315369	1.78738	2.50273	3.99299e-09	1.03087e-07	yes
XLOC_002442	Col18a1	chr10:76514923-76629275	12.6417	6.84524	-0.88502	1.5394e-06	2.37435e-05	yes
XLOC_002445	1810008A18Rik	chr10:76949399-76978558	6.9703	4.08569	-0.77064	0.00167714	0.0102892	yes
XLOC_002452	Pfkl	chr10:77449693-77472541	60.2294	23.2243	-1.37483	0	0	yes
XLOC_002455	Pwp2	chr10:77633654-77647894	7.38576	4.3085	-0.777561	0.000208367	0.00176242	yes
XLOC_002460	Syde1	chr10:78037244-78054709	3.37349	5.74545	0.768179	0.00598382	0.0292035	yes
XLOC_002470	Shc2	chr10:79080667-79100663	11.9026	5.87968	-1.01747	3.18441e-06	4.53855e-05	yes
XLOC_002480	Polr2e	chr10:79498697-79502404	56.9009	21.7191	-1.38949	1.44285e-12	6.36348e-11	yes
XLOC_002489	Uqcr11	chr10:79865741-79869566	90.5103	43.3561	-1.06185	2.93222e-06	4.2168e-05	yes
XLOC_002493	Klf16	chr10:80029865-80040041	1.83274	0.703469	-1.38144	0.000988128	0.00664159	yes
XLOC_002496	Mknk2	chr10:80127923-80138677	9.68524	6.50091	-0.575146	0.00903326	0.0408954	yes
XLOC_002499	Plekhj1	chr10:80258842-80267667	11.7433	6.01502	-0.965198	0.00643767	0.0309451	yes
XLOC_002502	Lsm7	chr10:80315569-80317954	108.825	55.2368	-0.978304	1.39063e-06	2.16583e-05	yes
XLOC_002503	Timm13	chr10:80342560-80363714	18.6614	7.87935	-1.24391	5.36702e-07	9.26332e-06	yes
XLOC_002512	Atcay	chr10:80657435-80693524	0.5777	1.83826	1.66995	0.00014583	0.00130132	yes
XLOC_002521	Ncln	chr10:80949203-80959108	9.28834	6.23188	-0.575755	0.00970524	0.0431617	yes
XLOC_002531	1190007I07Rik	chr10:82082595-82085973	6.46986	2.07318	-1.64189	0.0101665	0.0447247	yes
XLOC_002533	Nfyb	chr10:82211444-82226886	21.0674	15.6958	-0.424637	0.0111747	0.048131	yes
XLOC_002538	Ckap4	chr10:83989049-83996633	22.3326	16.3973	-0.445693	0.00936734	0.0420893	yes
XLOC_002542	Cry1	chr10:84594444-84647799	10.9512	7.79484	-0.4905	0.00978518	0.0434264	yes
XLOC_002544	D10Wsu52e	chr10:85401381-85420538	62.607	38.8161	-0.689668	1.82666e-05	0.000214372	yes
XLOC_002547	Hsp90b1	chr10:86153585-86168189	548.715	344.845	-0.670112	0.00167847	0.010294	yes
XLOC_002549	Ascl1	chr10:86953785-86956405	0.964828	44.5586	5.52929	0	0	yes
XLOC_002552	Chpt1	chr10:87922331-87966715	2.35417	4.64779	0.981323	0.00822646	0.0379977	yes
XLOC_002556	Utp20	chr10:88209351-88289559	13.2121	8.62593	-0.615104	0.000122484	0.00112391	yes
XLOC_002558	Gas2l3	chr10:88871567-88906712	9.46808	3.70617	-1.35314	2.73115e-14	1.52411e-12	yes
XLOC_002562	Actr6	chr10:89174717-89195040	10.9784	7.22049	-0.6045	0.00989197	0.0438089	yes
XLOC_002570	Nedd1	chr10:92147489-92185163	11.8045	8.61392	-0.45459	0.00849623	0.0389711	yes
XLOC_002579	Elk3	chr10:92709944-92773904	1.21139	2.35564	0.959458	0.00604786	0.029441	yes
XLOC_002581	Snrpf	chr10:93003376-93067990	52.6424	19.2057	-1.45469	5.69322e-13	2.6644e-11	yes
XLOC_002582	Gm8580	chr10:93103778-93209954	60.9608	29.3165	-1.05617	9.56826e-06	0.000120255	yes
XLOC_002584	Metap2	chr10:93321234-93353947	61.306	39.7193	-0.626189	0.00017228	0.00149687	yes
XLOC_002588	4932415G12Rik	chr10:94136237-94151358	0.556411	1.10306	0.987292	0.00861285	0.039421	yes
XLOC_002589	Plxnc1	chr10:94253258-94407212	1.65127	4.28558	1.37591	2.50342e-09	6.69245e-08	yes
XLOC_002592	Mrpl42	chr10:94943439-94964590	79.9745	55.7852	-0.519657	0.00572897	0.0282188	yes
XLOC_002593	Nudt4	chr10:95009640-95026801	12.4442	31.9523	1.36044	8.88178e-16	5.96513e-14	yes
XLOC_002605	Alx1	chr10:102470480-102491411	1.71732	0.242782	-2.82243	1.69026e-08	3.93113e-07	yes
XLOC_002614	Syt1	chr10:107934705-108448031	0.51311	1.46262	1.51122	0.000458362	0.0034614	yes
XLOC_002625	Tbc1d15	chr10:114634926-114688549	14.5796	9.05765	-0.686746	4.00529e-05	0.000426629	yes
XLOC_002629	Lgr5	chr10:114887369-115024836	1.79239	0.226526	-2.98413	3.33067e-15	2.05653e-13	yes
XLOC_002636	Cct2	chr10:116488053-116500870	216.451	133.233	-0.700091	1.76768e-05	0.000208088	yes
XLOC_002653	Hmga2	chr10:119798321-119913991	121.918	330.43	1.43844	5.65326e-13	2.65218e-11	yes
XLOC_002655	Msrb3	chr10:120218156-120336027	1.68914	7.70246	2.18903	4.39648e-14	2.38394e-12	yes
XLOC_002656	Lemd3	chr10:120360466-120416386	0.624723	4.05051	2.69682	2.38227e-11	8.63619e-10	yes
XLOC_002658	Rassf3	chr10:120847406-120913306	3.54595	1.25393	-1.49971	6.05752e-08	1.26996e-06	yes
XLOC_002660	Xpot	chr10:121024382-121063538	27.211	19.1141	-0.509556	0.001574	0.00976597	yes
XLOC_002661	Srgap1	chr10:121218046-121484371	1.40175	3.33206	1.24918	1.35294e-06	2.11921e-05	yes
XLOC_002663	Tmem5	chr10:121517575-121534158	12.2545	7.19012	-0.769218	0.00211004	0.012431	yes
XLOC_002667	Usp15	chr10:122550299-122634039	30.9953	20.7673	-0.577737	0.00037611	0.00294387	yes
XLOC_002679	Kif5a	chr10:126662750-126700419	1.0101	1.91191	0.920522	0.00817908	0.0378337	yes
XLOC_002685	Shmt2	chr10:126951994-126959504	39.8517	27.5289	-0.533698	0.00149269	0.00935516	yes
XLOC_002687	Lrp1	chr10:126975137-127058204	7.32167	4.82396	-0.601954	0.00164202	0.0101028	yes
XLOC_002698	Myl6	chr10:127927915-127930930	127.251	70.7757	-0.84635	2.35109e-05	0.000267552	yes
XLOC_002700	Esyt1	chr10:127947305-127962915	0.532447	1.45891	1.45418	0.0015379	0.00958543	yes
XLOC_002702	Rpl41	chr10:127985165-127986224	5153.52	2857.57	-0.85077	8.75266e-06	0.000111171	yes
XLOC_002703	Pa2g4	chr10:127994821-128002990	326.953	197.35	-0.728324	0.000168025	0.00146924	yes
XLOC_002705	Rps26	chr10:128061584-128063562	1270.96	624.517	-1.02511	1.59767e-10	5.18322e-09	yes
XLOC_002712	Ormdl2	chr10:128241720-128328774	14.0932	6.25244	-1.17251	0.000701192	0.00496725	yes
XLOC_002749	Neurod4	chr10:129705207-129717296	0	1.14461	1.79769e+308	2.69516e-16	1.93214e-14	yes
XLOC_002754	-	chr10:129965011-129981269	1.68875	0.814083	-1.05271	0.00551598	0.0274069	yes
XLOC_002787	-	chr10:14287015-14287113	2407.47	520.897	-2.20845	0.006441	0.0309456	yes
XLOC_002842	-	chr10:36859153-36860139	0.531979	7.96716	3.90462	7.61877e-08	1.55802e-06	yes
XLOC_002865	-	chr10:45197634-45201794	1.35753	0.710066	-0.934959	0.0047557	0.024242	yes
XLOC_002985	-	chr10:110942101-110942994	1.47712	0.217887	-2.76114	0.00139897	0.00886677	yes
XLOC_003013	-	chr10:122542069-122543735	2.22108	0.708052	-1.64934	0.000144436	0.00129008	yes
XLOC_003014	-	chr10:122544132-122546801	1.68483	0.687456	-1.29326	0.000611108	0.00442908	yes
XLOC_003031	-	chr10:129982019-129984562	1.05484	0.346469	-1.60623	0.000910495	0.00622643	yes
XLOC_003041	Pes1	chr11:3863889-3880732	13.593	9.04628	-0.587471	0.00354823	0.0191105	yes
XLOC_003049	Gatsl3	chr11:4118253-4122412	1.47961	0.213001	-2.79629	0.000159553	0.00141063	yes
XLOC_003054	Nipsnap1	chr11:4774005-4794203	19.0708	12.9179	-0.56199	0.00298799	0.0166436	yes
XLOC_003055	Thoc5	chr11:4795345-4828868	20.0023	13.3261	-0.585904	0.00143405	0.00905914	yes
XLOC_003056	Ap1b1	chr11:4838758-4942797	9.99025	6.30753	-0.663447	0.000777792	0.0054454	yes
XLOC_003059	Xbp1	chr11:5420969-5425875	26.922	15.5711	-0.789917	1.60413e-05	0.000190831	yes
XLOC_003067	Ppia	chr11:5997098-6355740	3135.8	1498.76	-1.06506	2.92228e-05	0.000324075	yes
XLOC_003069	Ramp3	chr11:6550150-6577478	2.74135	0.573536	-2.25693	5.19469e-05	0.000536598	yes
XLOC_003085	Cnrip1	chr11:16951936-16979375	4.03408	2.08621	-0.951353	0.00620719	0.030079	yes
XLOC_003087	Wdr92	chr11:17111895-17135203	4.68808	2.68811	-0.802408	0.000767254	0.00538636	yes
XLOC_003088	C1d	chr11:17157620-17169179	9.38329	5.3884	-0.800238	1.35484e-05	0.000164445	yes
XLOC_003095	Wdpcp	chr11:21472283-21798689	1.63344	3.75351	1.20033	0.000177177	0.00152653	yes
XLOC_003098	Cct4	chr11:22890592-22906824	212.42	117.4	-0.855485	2.01894e-06	3.02857e-05	yes
XLOC_003102	Pus10	chr11:23546478-23632876	19.7255	13.9423	-0.500594	0.00947367	0.0424177	yes
XLOC_003103	Bcl11a	chr11:23978055-24073558	0.0482109	17.7666	8.52559	2.19508e-08	4.99597e-07	yes
XLOC_003107	Gm12070	chr11:26685107-26687859	351.884	223.216	-0.656659	8.64164e-05	0.000829537	yes
XLOC_003112	Efemp1	chr11:28753204-28826743	1.68856	0.307047	-2.45926	3.72204e-07	6.69583e-06	yes
XLOC_003113	Pnpt1	chr11:29030682-29062971	19.0111	9.61869	-0.982927	5.47281e-08	1.16265e-06	yes
XLOC_003114	Smek2	chr11:29072906-29120797	20.9156	29.0535	0.474135	0.00287299	0.0161314	yes
XLOC_003115	Ccdc88a	chr11:29273735-29410811	15.3189	34.3773	1.16614	3.25873e-11	1.16155e-09	yes
XLOC_003118	Rtn4	chr11:29592897-29926033	46.331	65.3194	0.495535	0.00423573	0.0221157	yes
XLOC_003124	Nsg2	chr11:31900458-31959202	1.31692	8.37082	2.6682	4.9738e-13	2.36237e-11	yes
XLOC_003125	Snrnp25	chr11:32105414-32108995	18.9893	10.7136	-0.82574	0.00170229	0.0104001	yes
XLOC_003127	Hba-x	chr11:32176599-32178115	28.9854	585.234	4.33561	0	0	yes
XLOC_003128	Hba-a1,Hba-a2	chr11:32183671-32184493	4.44182	56.677	3.67354	3.36797e-12	1.3984e-10	yes
XLOC_003130	Hba-a1,Hba-a2	chr11:32196488-32197310	1.95565	28.546	3.86757	7.94595e-10	2.29402e-08	yes
XLOC_003134	Stk10	chr11:32433265-32524677	3.02814	1.61387	-0.907907	0.00227017	0.0132359	yes
XLOC_003139	Slit3	chr11:34934957-35522694	2.58513	1.24237	-1.05714	0.000998541	0.00669929	yes
XLOC_003141	Pank3	chr11:35582996-35604787	8.54758	16.164	0.919201	1.33339e-08	3.15871e-07	yes
XLOC_003144	Gabrb2	chr11:42233258-42446160	0.525342	1.59576	1.60292	9.55694e-07	1.55685e-05	yes
XLOC_003151	Rnf145	chr11:44332465-44379309	38.8614	26.1178	-0.573303	0.000377441	0.00295002	yes
XLOC_003156	Adam19	chr11:45869488-45960844	0.737351	2.25888	1.61518	1.73704e-07	3.35168e-06	yes
XLOC_003166	Gnb2l1	chr11:48613861-48619743	655.893	314.953	-1.05832	5.22099e-10	1.56148e-08	yes
XLOC_003212	Nhp2	chr11:51433274-51449398	60.984	20.4582	-1.57575	1.68754e-14	9.61345e-13	yes
XLOC_003215	Cdkn2aipnl	chr11:51781132-51790838	20.4049	13.286	-0.619009	0.000925737	0.00630907	yes
XLOC_003217	Ppp2ca	chr11:51912325-51936251	129.85	79.1293	-0.714566	6.78701e-06	8.82541e-05	yes
XLOC_003219	Skp1a	chr11:52045496-52060360	137.596	86.3357	-0.672408	2.20967e-05	0.000254025	yes
XLOC_003220	Vdac1	chr11:52174616-52202898	73.332	53.0867	-0.466091	0.00351055	0.018971	yes
XLOC_003223	Zcchc10	chr11:53138190-53146803	13.2306	4.67022	-1.50232	1.00604e-10	3.36655e-09	yes
XLOC_003228	Kif3a	chr11:53380880-53417746	5.82357	10.2749	0.819146	2.62151e-06	3.82166e-05	yes
XLOC_003231	P4ha2	chr11:53914425-53945169	2.87853	0.718971	-2.00133	6.12604e-05	0.000617475	yes
XLOC_003232	Acsl6	chr11:54117325-54178255	2.01576	6.68421	1.72943	3.56194e-07	6.43198e-06	yes
XLOC_003238	Gpx3	chr11:54716354-54723889	12.0826	7.5082	-0.686389	0.0087052	0.0397771	yes
XLOC_003241	G3bp1	chr11:55283141-55318919	97.2953	54.232	-0.843226	1.77475e-05	0.000208793	yes
XLOC_003244	Mfap3	chr11:57332166-57347319	17.1654	12.5044	-0.457068	0.00814053	0.0377104	yes
XLOC_003247	Larp1	chr11:57822565-57875534	46.2278	25.4908	-0.858786	6.31984e-08	1.31917e-06	yes
XLOC_003249	Mrpl22	chr11:57985155-57993082	20.9013	11.9264	-0.809435	0.00273033	0.0154848	yes
XLOC_003278	Wnt9a	chr11:59120431-59147054	0.240546	2.2159	3.20351	3.3067e-07	6.03945e-06	yes
XLOC_003287	Rai1	chr11:59918514-60034106	4.6919	6.90736	0.557961	0.00788607	0.0367447	yes
XLOC_003290	Drg2	chr11:60268118-60282207	17.6623	12.3616	-0.514812	0.0116938	0.0498399	yes
XLOC_003299	Kcnj12	chr11:60879305-60884633	1.10968	0.0675101	-4.03889	1.64131e-05	0.00019489	yes
XLOC_003302	Mfap4	chr11:61298629-61302243	1.85195	9.54001	2.36494	2.24862e-07	4.26076e-06	yes
XLOC_003306	Specc1	chr11:61890573-62036515	3.03046	10.7737	1.82991	8.43769e-15	5.01571e-13	yes
XLOC_003310	Ubb	chr11:62365005-62366714	345.916	219.931	-0.653369	4.04009e-05	0.000429619	yes
XLOC_003312	2410006H16Rik	chr11:62416378-62462025	66.1667	36.1625	-0.87161	0.00114814	0.00751847	yes
XLOC_003319	Fam18b	chr11:62692991-62708686	12.6438	6.688	-0.918788	9.19793e-06	0.000116286	yes
XLOC_003322	Pmp22	chr11:62945011-62973048	3.813	1.04389	-1.86896	1.23805e-07	2.46593e-06	yes
XLOC_003346	Rpl26	chr11:68715067-68718036	875.913	359.459	-1.28496	2.22045e-15	1.39349e-13	yes
XLOC_003361	Trp53	chr11:69393860-69405375	118.894	83.0895	-0.516936	0.00211533	0.012443	yes
XLOC_003382	Mgl2	chr11:69943858-69951044	1.7264	0.671684	-1.36191	0.0055244	0.0274158	yes
XLOC_003388	Med11	chr11:70265432-70279701	12.144	5.30739	-1.19416	0.000151823	0.00134727	yes
XLOC_003398	Eno3	chr11:70470714-70476015	15.0116	7.44894	-1.01097	0.000224383	0.00187961	yes
XLOC_003406	Txndc17	chr11:72020818-72023989	25.9073	13.4443	-0.946366	4.68824e-07	8.18774e-06	yes
XLOC_003412	Mybbp1a	chr11:72254879-72265052	71.273	42.0252	-0.762099	1.81433e-06	2.75839e-05	yes
XLOC_003415	Zzef1	chr11:72609727-72740622	1.54146	2.50847	0.702516	0.00316715	0.01746	yes
XLOC_003443	Mettl16	chr11:74584337-74640103	26.7541	16.1898	-0.724679	0.000333725	0.00264864	yes
XLOC_003445	Tsr1	chr11:74711581-74739300	13.7002	8.1275	-0.753316	0.000562494	0.00412044	yes
XLOC_003450	Rtn4rl1	chr11:75007494-75081264	1.54875	0.345887	-2.16273	7.85674e-07	1.30884e-05	yes
XLOC_003461	Myo1c	chr11:75465010-75488136	1.761	0.839819	-1.06824	0.000345606	0.002732	yes
XLOC_003474	Ssh2	chr11:77029771-77273721	4.77441	7.13552	0.579695	0.00101756	0.00681493	yes
XLOC_003478	Nufip2	chr11:77499640-77531468	16.6592	11.9632	-0.477714	0.00261631	0.0149238	yes
XLOC_003479	Myo18a	chr11:77590766-77679482	1.62544	3.60771	1.15025	6.31941e-05	0.000631315	yes
XLOC_003487	Tlcd1	chr11:77992267-77994274	4.41772	1.37177	-1.68726	2.63864e-05	0.000295877	yes
XLOC_003488	Rab34	chr11:78001928-78005695	14.5621	4.68678	-1.63555	6.902e-10	2.02005e-08	yes
XLOC_003491	2610507B11Rik	chr11:78075255-78104127	37.4979	26.4117	-0.505633	0.00149151	0.00935352	yes
XLOC_003509	Suz12	chr11:79806607-79847625	29.0293	41.3173	0.509234	0.00288435	0.0161667	yes
XLOC_003514	Rhbdl3	chr11:80114413-80169488	0.0866525	1.64794	4.24928	1.57842e-06	2.42671e-05	yes
XLOC_003517	Cdk5r1	chr11:80290547-80294681	0.558624	2.18119	1.96517	1.38625e-06	2.16076e-05	yes
XLOC_003518	Tmem98	chr11:80623916-80635535	2.71754	22.7164	3.06336	0	0	yes
XLOC_003532	Slfn5	chr11:82724754-82778352	1.25736	0.73151	-0.781451	0.00603128	0.0293902	yes
XLOC_003538	AA465934,AI450353	chr11:83105200-83112639	78.9782	7.35535	-3.42459	4.88498e-15	2.96836e-13	yes
XLOC_003540	Rasl10b	chr11:83223573-83234540	1.8436	0.72554	-1.3454	0.000214129	0.00180398	yes
XLOC_003556	Car4	chr11:84771255-84779556	43.2886	0.0723501	-9.22478	0	0	yes
XLOC_003574	Supt4h1	chr11:87551066-87557119	79.5889	35.3401	-1.17126	8.62417e-10	2.47861e-08	yes
XLOC_003583	Mrps23	chr11:88017919-88025009	17.531	10.5445	-0.733418	0.000809281	0.00563904	yes
XLOC_003586	C030037D09Rik	chr11:88579956-88589886	1.31985	2.93146	1.15125	0.0023231	0.0135033	yes
XLOC_003590	Trim25	chr11:88860716-88881607	9.16442	0.675782	-3.76141	0	0	yes
XLOC_003594	Cox11	chr11:90499497-90549058	7.42927	4.33145	-0.778369	0.0056794	0.0280034	yes
XLOC_003596	Car10	chr11:92960603-93463065	2.03402	0.0864397	-4.5565	2.7838e-05	0.000310768	yes
XLOC_003598	Spag9	chr11:93857404-93987396	9.73427	23.5204	1.27277	4.17888e-13	2.02501e-11	yes
XLOC_003599	Tob1	chr11:94072767-94076806	5.71849	9.28014	0.698513	0.00133448	0.00850873	yes
XLOC_003600	Ankrd40	chr11:94189314-94203161	7.59511	10.7516	0.501411	0.00944181	0.0423443	yes
XLOC_003607	Samd14	chr11:94871192-94887401	3.49323	7.04517	1.01207	0.00028908	0.00234263	yes
XLOC_003611	Fam117a	chr11:95198331-95243186	6.32733	1.91176	-1.72669	2.6745e-09	7.09038e-08	yes
XLOC_003612	Slc35b1	chr11:95246235-95252966	22.2863	12.7978	-0.800266	0.000217417	0.00182766	yes
XLOC_003614	Phb	chr11:95528270-95542087	78.4043	45.5737	-0.782731	1.3019e-06	2.04931e-05	yes
XLOC_003621	Snf8	chr11:95896230-95908719	20.9529	13.3038	-0.65531	0.00573641	0.0282482	yes
XLOC_003637	Cbx1	chr11:96650437-96669954	143.636	93.7504	-0.615522	0.000709118	0.00501598	yes
XLOC_003642	Sp6	chr11:96874882-96886730	3.05623	0.105807	-4.85225	1.33227e-14	7.70421e-13	yes
XLOC_003644	Mrpl10	chr11:96902899-96910527	16.9268	10.216	-0.728484	0.00044102	0.00335249	yes
XLOC_003646	Mrpl45	chr11:97177029-97191234	10.3973	7.22109	-0.525917	0.0100912	0.0444853	yes
XLOC_003650	Mllt6	chr11:97524725-97546952	1.68118	5.16109	1.6182	1.71648e-06	2.62841e-05	yes
XLOC_003652	Psmb3	chr11:97564747-97574814	151.121	83.0812	-0.86311	2.67122e-07	4.97856e-06	yes
XLOC_003655	Rpl19	chr11:97888023-97891807	1054.87	586.27	-0.84743	5.64005e-07	9.6562e-06	yes
XLOC_003663	Grb7	chr11:98308147-98316687	5.19658	0.183884	-4.8207	0	0	yes
XLOC_003669	Psmd3	chr11:98543867-98557292	20.9946	15.049	-0.480351	0.0113056	0.0486295	yes
XLOC_003671	Thra	chr11:98603186-98636556	2.14346	5.82496	1.44231	0.00169515	0.0103697	yes
XLOC_003674	Rapgefl1	chr11:98698098-98715124	0.376859	1.09506	1.53891	0.0105798	0.0461375	yes
XLOC_003675	Wipf2	chr11:98724911-98767554	6.61258	4.60413	-0.522285	0.00488871	0.0248444	yes
XLOC_003676	Cdc6	chr11:98769202-98785256	13.161	8.94944	-0.556398	0.00130351	0.00835636	yes
XLOC_003677	Rara	chr11:98799009-98836256	7.20895	4.52332	-0.672407	0.0109267	0.0472649	yes
XLOC_003678	Igfbp4	chr11:98902573-98913957	32.6637	18.5652	-0.815089	5.09974e-06	6.82616e-05	yes
XLOC_003688	Eif1	chr11:100181309-100183410	157.739	106.297	-0.56944	0.000304917	0.00245228	yes
XLOC_003690	Fkbp10	chr11:100277007-100302403	6.22414	1.62721	-1.93547	9.12916e-08	1.84609e-06	yes
XLOC_003706	Vps25	chr11:101115056-101120860	46.7254	28.5663	-0.709891	0.000114776	0.00106595	yes
XLOC_003709	Psme3	chr11:101177564-101184844	66.884	50.0858	-0.417261	0.00837164	0.0384549	yes
XLOC_003714	Rpl27	chr11:101303558-101306910	629.773	278.283	-1.17828	4.9476e-12	2.01923e-10	yes
XLOC_003716	Rnd2	chr11:101329651-101333180	10.5574	23.4887	1.15372	9.06575e-05	0.000865042	yes
XLOC_003717	Nbr1	chr11:101413420-101443265	13.734	19.5504	0.509441	0.00386972	0.0205522	yes
XLOC_003733	Fzd2	chr11:102465744-102470729	27.5846	14.9361	-0.88506	7.15357e-07	1.20216e-05	yes
XLOC_003738	Nmt1	chr11:102889664-102930223	18.3756	11.0595	-0.732505	0.00164489	0.0101172	yes
XLOC_003746	Arf2	chr11:103828057-103846650	12.1944	22.3282	0.872648	2.92319e-06	4.20697e-05	yes
XLOC_003753	Mettl2	chr11:104987738-105002462	14.1675	8.02393	-0.820201	0.000187765	0.00160662	yes
XLOC_003756	-	chr11:105369969-105375529	0	1.6407	1.79769e+308	0.00552119	0.0274069	yes
XLOC_003760	Dcaf7	chr11:105898185-105920637	20.326	33.7525	0.731667	4.39149e-06	5.987e-05	yes
XLOC_003764	Psmc5	chr11:106117498-106124426	136.647	97.1476	-0.492202	0.00185723	0.011165	yes
XLOC_003786	Sox9	chr11:112643523-112649071	12.9846	26.7212	1.04118	3.19704e-10	9.91809e-09	yes
XLOC_003792	Rpl38	chr11:114529856-114533645	1751.34	604.341	-1.53502	0	0	yes
XLOC_003797	Gprc5c	chr11:114712845-114734329	6.6552	0.562235	-3.56524	0	0	yes
XLOC_003800	Slc9a3r1	chr11:115024654-115042492	8.39737	2.72984	-1.62112	3.7251e-09	9.66154e-08	yes
XLOC_003811	Mrps7	chr11:115465464-115468938	18.5496	12.6299	-0.554543	0.0111848	0.0481638	yes
XLOC_003841	Syngr2	chr11:117670980-117675600	8.49523	3.71777	-1.19221	9.52498e-05	0.000902116	yes
XLOC_003844	Birc5	chr11:117710550-117717057	96.3886	50.2016	-0.941129	9.62774e-08	1.94188e-06	yes
XLOC_003854	Slc26a11	chr11:119216870-119242390	1.29603	3.70525	1.51547	0.00103409	0.00690391	yes
XLOC_003862	Chmp6	chr11:119775123-119780866	8.70599	5.0076	-0.79789	0.00306164	0.0169863	yes
XLOC_003865	1810043H04Rik	chr11:119960247-119961738	19.9028	10.5006	-0.922497	0.0109091	0.0471994	yes
XLOC_003870	Ccdc137	chr11:120319442-120328914	8.06419	4.89774	-0.719415	0.00310191	0.01716	yes
XLOC_003872	Mrpl12	chr11:120345982-120350068	65.572	26.4562	-1.30947	8.62355e-12	3.29468e-10	yes
XLOC_003875	Anapc11	chr11:120459734-120469512	4.62026	2.78885	-0.728305	0.00961735	0.0429004	yes
XLOC_003881	Slc16a3	chr11:120809797-120820314	28.2015	5.93909	-2.24745	0	0	yes
XLOC_003905	Ccdc157	chr11:4035162-4060296	0.67338	1.24828	0.890447	0.0098314	0.0436012	yes
XLOC_003907	Mtmr3	chr11:4380870-4494818	4.3959	6.42315	0.547124	0.0047036	0.0240405	yes
XLOC_003909	Uqcr10	chr11:4601970-4604347	154.481	84.681	-0.86732	4.70609e-06	6.35256e-05	yes
XLOC_003911	Nf2	chr11:4665847-4749547	9.74498	6.09023	-0.678162	0.0012681	0.00816971	yes
XLOC_003912	Nefh	chr11:4838758-4942797	2.08627	0.108344	-4.26724	5.97973e-05	0.000606561	yes
XLOC_003935	Gm11974	chr11:6425593-6428763	22.4835	11.4516	-0.973322	0.000863041	0.00595511	yes
XLOC_003936	Nacad	chr11:6497825-6506057	0.120224	1.10027	3.19406	4.6501e-05	0.000487445	yes
XLOC_003943	Igfbp3	chr11:7106095-7113926	6.44827	1.07968	-2.57831	0	0	yes
XLOC_003956	Pno1	chr11:17103202-17111592	32.6293	16.1252	-1.01685	7.04545e-09	1.74685e-07	yes
XLOC_003958	Meis1	chr11:18780430-18918972	10.2961	4.48916	-1.19758	1.37778e-09	3.81101e-08	yes
XLOC_003963	1110067D22Rik	chr11:20723357-20731111	1.25513	2.80139	1.15831	0.000188344	0.00161086	yes
XLOC_003964	Ugp2	chr11:21138891-21271206	4.84509	9.40977	0.957637	0.00638969	0.0307608	yes
XLOC_003967	Mdh1	chr11:21456694-21471937	52.9274	34.448	-0.619595	0.000105501	0.000987476	yes
XLOC_003971	Commd1	chr11:22799727-22882284	48.9307	29.0629	-0.751562	0.000467168	0.00351773	yes
XLOC_003975	0610010F05Rik	chr11:23473775-23533631	7.10989	12.0599	0.762317	3.0111e-05	0.000331429	yes
XLOC_003986	Rps27a	chr11:29445841-29478352	736.404	196.926	-1.90284	0	0	yes
XLOC_003994	Stc2	chr11:31259440-31270092	9.59325	2.94678	-1.70288	1.66016e-07	3.21956e-06	yes
XLOC_004001	Fgf18	chr11:33017430-33047400	0.388502	3.46303	3.15604	0.000143303	0.00128196	yes
XLOC_004011	Rars	chr11:35621882-35648030	86.1439	50.1182	-0.781413	8.93248e-07	1.46635e-05	yes
XLOC_004013	Odz2	chr11:35820164-36757745	0.166001	1.09468	2.72125	0.00013057	0.0011856	yes
XLOC_004030	Thg1l	chr11:45758885-45768996	19.8112	8.7564	-1.17791	6.5144e-05	0.000648762	yes
XLOC_004032	Cyfip2	chr11:46007350-46126361	4.80903	13.8693	1.52807	0	0	yes
XLOC_004048	Cnot6	chr11:49485137-49526212	22.545	31.3922	0.477599	0.0110362	0.0476418	yes
XLOC_004052	Canx	chr11:50107458-50139175	124.189	89.0498	-0.479853	0.00730907	0.0344334	yes
XLOC_004072	Tcf7	chr11:52060847-52096464	9.04582	3.75975	-1.26662	6.74791e-06	8.78054e-05	yes
XLOC_004076	Uqcrq	chr11:53242449-53244333	98.8374	57.3823	-0.784452	0.000313417	0.0025143	yes
XLOC_004090	Lyrm7	chr11:54652790-54674093	0.445252	1.19085	1.4193	0.00997428	0.0441322	yes
XLOC_004099	Atox1	chr11:55260144-55274640	38.7435	23.3846	-0.728394	0.00781979	0.0364714	yes
XLOC_004104	Gemin5	chr11:57933351-57982041	20.2475	9.08385	-1.15637	3.51819e-11	1.24707e-09	yes
XLOC_004125	Guk1	chr11:58997356-59005454	44.5695	22.4362	-0.990226	2.53204e-07	4.74688e-06	yes
XLOC_004128	Wnt3a	chr11:59061543-59104253	0.231824	1.16655	2.33114	0.000973869	0.00657525	yes
XLOC_004136	Pld6	chr11:59595537-59601159	1.00113	0.221006	-2.17948	0.00258485	0.0147647	yes
XLOC_004143	Tom1l2	chr11:60040215-60166407	1.47191	3.39504	1.20574	0.000361641	0.00284512	yes
XLOC_004152	Aldh3a2	chr11:61058256-61080629	2.93853	4.82764	0.716221	0.0106624	0.0463626	yes
XLOC_004160	Ulk2	chr11:61589085-61668594	2.85324	6.77738	1.24813	8.98035e-10	2.5694e-08	yes
XLOC_004169	Hs3st3b1	chr11:63698194-63735786	4.39621	0.309296	-3.8292	0	0	yes
XLOC_004189	Rangrf	chr11:68781632-68787322	53.9132	17.5098	-1.62248	6.87228e-13	3.18504e-11	yes
XLOC_004190	Pfas	chr11:68799202-68821962	16.2357	9.66069	-0.748973	4.66866e-06	6.30647e-05	yes
XLOC_004194	Chd3	chr11:69156774-69182893	4.49604	12.8159	1.51121	3.83915e-13	1.86511e-11	yes
XLOC_004195	Cyb5d1	chr11:69204378-69211736	9.95228	14.4856	0.541516	0.00511711	0.0258094	yes
XLOC_004196	Tmem88	chr11:69204378-69211736	8.74794	2.19248	-1.99638	0.00115179	0.00753881	yes
XLOC_004203	Mir467f	chr11:69446472-69467658	2.207	1.23225	-0.84079	0.00508881	0.0256976	yes
XLOC_004207	Eif4a1	chr11:69480437-69485925	377.506	239.818	-0.654555	0.000175414	0.00151516	yes
XLOC_004208	Senp3	chr11:69486611-69495586	25.6329	16.1993	-0.662064	0.000172234	0.00149687	yes
XLOC_004220	Kctd11	chr11:69691765-69694487	3.50348	1.58878	-1.14086	0.000165083	0.00145068	yes
XLOC_004223	Eif5a	chr11:69730213-69735460	460.302	219.637	-1.06746	3.68281e-10	1.12969e-08	yes
XLOC_004226	Acadvl	chr11:69823693-69830034	4.01247	7.44831	0.892422	0.00281582	0.0158675	yes
XLOC_004230	Rnasek	chr11:70051623-70053355	36.1595	20.1066	-0.846709	0.00163671	0.0100799	yes
XLOC_004234	Pelp1	chr11:70204049-70223533	12.4434	6.92855	-0.844755	4.7582e-05	0.000497415	yes
XLOC_004239	Pfn1	chr11:70465348-70468152	396.384	270.727	-0.550062	0.00066242	0.00472054	yes
XLOC_004244	C1qbp	chr11:70783701-70796528	174.652	81.6554	-1.09686	1.9698e-11	7.22299e-10	yes
XLOC_004245	Dhx33	chr11:70797592-70817934	12.0424	7.34599	-0.713089	3.12642e-05	0.000343529	yes
XLOC_004247	6330403K07Rik	chr11:70833112-70847119	18.2497	35.7923	0.971775	0.00151068	0.00944967	yes
XLOC_004248	Nlrp1a	chr11:70904698-70958206	9.5717	4.30223	-1.15369	3.13766e-10	9.74967e-09	yes
XLOC_004258	Smtnl2	chr11:72202667-72225218	10.7268	2.23851	-2.26061	0	0	yes
XLOC_004263	Tmem93	chr11:72989004-72990544	14.6552	9.31147	-0.654332	0.00336301	0.0183499	yes
XLOC_004287	Sgsm2	chr11:74662765-74710582	0.825455	1.60737	0.961443	0.00729081	0.0343643	yes
XLOC_004292	Rpa1	chr11:75113760-75161885	32.5194	24.3849	-0.415312	0.0104552	0.0457111	yes
XLOC_004298	Fam101b	chr11:75832477-75841284	8.10714	2.77113	-1.54872	6.01053e-11	2.08042e-09	yes
XLOC_004305	Cpd	chr11:76590709-76660510	6.67942	10.0822	0.59402	0.000266103	0.0021823	yes
XLOC_004308	Ankrd13b	chr11:77283984-77303180	4.82243	8.60222	0.834949	0.000767389	0.00538636	yes
XLOC_004310	Taok1	chr11:77342632-77421317	19.2495	25.8978	0.428008	0.0113701	0.0488628	yes
XLOC_004311	Cryba1	chr11:77531913-77538795	1.25529	0.14799	-3.08445	0.000594327	0.00432219	yes
XLOC_004317	Rpl23a	chr11:77994436-77997086	1653.37	1040.53	-0.668094	0.000117112	0.00108228	yes
XLOC_004324	Sarm1	chr11:78285831-78311256	0.389711	1.60397	2.04117	1.25446e-05	0.000153331	yes
XLOC_004327	Tmem97	chr11:78349781-78364237	21.1122	9.57775	-1.14032	4.02968e-05	0.00042875	yes
XLOC_004332	Wsb1	chr11:79052883-79068197	24.4067	33.4724	0.455696	0.00979449	0.0434576	yes
XLOC_004339	Crlf3	chr11:79860000-79894457	13.354	7.45486	-0.841015	0.000351112	0.00276683	yes
XLOC_004352	Slfn8,Slfn9	chr11:82791496-82834312	1.96669	5.81834	1.56484	2.80004e-10	8.78615e-09	yes
XLOC_004366	Aatf	chr11:84236357-84327003	37.3795	26.3123	-0.506508	0.00386775	0.0205475	yes
XLOC_004367	Lhx1	chr11:84331484-84339036	0.0126629	1.80679	7.15668	0.0029271	0.0163727	yes
XLOC_004372	Pigw	chr11:84689814-84729858	3.27644	1.44053	-1.18553	0.00747508	0.0350688	yes
XLOC_004373	Znhit3	chr11:84689814-84729858	29.6137	17.4534	-0.762761	0.00284	0.0159836	yes
XLOC_004386	Ypel2	chr11:86749926-86807264	0.327171	1.25108	1.93506	8.59227e-06	0.000109424	yes
XLOC_004387	Gdpd1	chr11:86847295-86887639	9.78643	16.3181	0.737622	8.35065e-05	0.000807272	yes
XLOC_004390	Ppm1e	chr11:86940557-87172496	2.8337	6.27133	1.14608	0.00115597	0.00755687	yes
XLOC_004397	Dynll2	chr11:87793026-87811800	17.225	8.34229	-1.04598	1.41491e-07	2.79493e-06	yes
XLOC_004405	Ankfn1	chr11:89282399-89399869	0.200835	1.56282	2.96007	0.000172007	0.00149654	yes
XLOC_004406	Pctp	chr11:89844730-89864208	8.52612	3.94057	-1.11349	6.00056e-06	7.89937e-05	yes
XLOC_004409	Tom1l1	chr11:90499497-90549058	11.6397	5.27317	-1.14231	3.13513e-06	4.47832e-05	yes
XLOC_004411	Utp18	chr11:93720556-93747080	17.7502	9.78351	-0.859414	7.59432e-07	1.26954e-05	yes
XLOC_004412	Nme2	chr11:93811128-93817321	288.672	130.203	-1.14867	2.03836e-10	6.51357e-09	yes
XLOC_004413	Nme1	chr11:93820238-93829835	130.395	64.9933	-1.00453	4.37671e-10	1.32136e-08	yes
XLOC_004421	Rsad1	chr11:94401111-94410521	0.429162	1.11999	1.3839	0.0086565	0.0395735	yes
XLOC_004422	Acsf2	chr11:94418415-94463100	0.548369	4.29537	2.96956	9.10736e-11	3.07993e-09	yes
XLOC_004431	Itga3	chr11:94905795-94938028	1.83688	0.693569	-1.40515	6.57781e-05	0.000654737	yes
XLOC_004439	Igf2bp1	chr11:95818477-95867258	55.7923	38.9462	-0.518584	0.00196588	0.0116824	yes
XLOC_004440	Ube2z	chr11:95908749-95926678	14.8758	7.31838	-1.02337	7.82636e-09	1.91811e-07	yes
XLOC_004441	Atp5g1	chr11:95934106-95937008	176.96	97.9246	-0.853678	1.76563e-06	2.6929e-05	yes
XLOC_004452	Tbkbp1	chr11:96997484-97011026	1.92185	0.906444	-1.0842	0.00305104	0.0169423	yes
XLOC_004457	E130012A19Rik	chr11:97488700-97491030	9.2653	4.40437	-1.0729	2.2031e-05	0.000253423	yes
XLOC_004458	Pcgf2	chr11:97550136-97561865	42.0442	27.5176	-0.611553	0.008292	0.0381807	yes
XLOC_004462	Rpl23	chr11:97638839-97643753	508.633	208.294	-1.28801	9.54792e-15	5.58889e-13	yes
XLOC_004481	Top2a	chr11:98854165-98885511	108.641	162.132	0.577593	0.00258119	0.0147526	yes
XLOC_004539	Leprel4	chr11:100269459-100276133	6.04466	1.20545	-2.32609	3.95394e-08	8.58078e-07	yes
XLOC_004552	Stat3	chr11:100748034-100800825	1.158	3.12927	1.43419	0.000126147	0.00115145	yes
XLOC_004570	Mpp2	chr11:101918330-101949829	2.0274	4.34256	1.09892	4.53114e-05	0.000475758	yes
XLOC_004574	Lsm12	chr11:102024096-102046586	85.3022	62.4169	-0.450647	0.0115212	0.0493461	yes
XLOC_004578	Slc4a1	chr11:102210133-102226595	0.0889422	2.30546	4.69604	2.00904e-09	5.41619e-08	yes
XLOC_004585	Ccdc43	chr11:102546001-102559039	13.5932	8.72018	-0.640451	0.00133924	0.00853339	yes
XLOC_004587	Eftud2	chr11:102699785-102742289	50.7079	35.2491	-0.524625	0.00166095	0.0102062	yes
XLOC_004590	C1ql1	chr11:102799897-102807777	3.7922	1.05196	-1.84995	0.00016865	0.00147336	yes
XLOC_004620	Pecam1	chr11:106515531-106576595	0.0584034	1.21397	4.37754	0.00025399	0.00209372	yes
XLOC_004626	Nol11	chr11:107027974-107050695	21.7227	14.7641	-0.557105	0.000811402	0.00565177	yes
XLOC_004629	Cacng4	chr11:107593637-107655800	2.66884	14.2628	2.41797	0	0	yes
XLOC_004650	Cdc42ep4	chr11:113588163-113613129	3.35902	21.7637	2.69581	0	0	yes
XLOC_004651	Sdk2	chr11:113641037-113927378	1.17511	0.475138	-1.30637	0.000347415	0.00274108	yes
XLOC_004668	C630004H02Rik	chr11:115209019-115229033	2.71802	6.5317	1.2649	3.70986e-06	5.19082e-05	yes
XLOC_004669	Atp5h	chr11:115277002-115281233	183.476	121.388	-0.595962	0.000594172	0.00432219	yes
XLOC_004677	Grb2	chr11:115505457-115569911	11.8337	7.9485	-0.57415	0.00376299	0.0200781	yes
XLOC_004688	Acox1	chr11:116033201-116076632	3.64676	6.86336	0.912302	6.20986e-05	0.000622971	yes
XLOC_004690	Srp68	chr11:116106479-116135531	32.0701	22.5267	-0.509594	0.00243295	0.0140438	yes
XLOC_004692	Foxj1	chr11:116192017-116196668	0.0531381	1.07101	4.33308	0.000322955	0.00257785	yes
XLOC_004693	Rnf157	chr11:116197101-116274346	3.15075	6.27346	0.993566	0.000884613	0.00607549	yes
XLOC_004695	Prpsap1	chr11:116332129-116351660	34.9245	24.502	-0.51134	0.00340818	0.018533	yes
XLOC_004711	Usp36	chr11:118120966-118151558	9.57641	4.30281	-1.15421	1.82094e-08	4.20216e-07	yes
XLOC_004712	Timp2	chr11:118162374-118216725	5.43282	9.63061	0.825927	5.27882e-05	0.000544407	yes
XLOC_004732	Actg1	chr11:120207003-120209798	445.172	291.525	-0.610745	0.000458422	0.0034614	yes
XLOC_004740	P4hb	chr11:120421617-120434250	125.778	81.3656	-0.628385	8.61875e-05	0.000827755	yes
XLOC_004741	Arhgdia	chr11:120438548-120442934	141.115	74.7359	-0.916998	1.56121e-08	3.65768e-07	yes
XLOC_004745	Mafg	chr11:120486428-120496804	6.75257	3.9346	-0.77922	0.0055692	0.027588	yes
XLOC_004763	Wdr45l	chr11:121185463-121215761	12.0574	7.6874	-0.649354	0.00293533	0.016414	yes
XLOC_004850	-	chr11:48609547-48610941	1.94177	0.525569	-1.88542	0.000272678	0.00222763	yes
XLOC_004873	-	chr11:51946142-51948331	0.190158	1.07717	2.50197	0.00128557	0.00825744	yes
XLOC_004917	-	chr11:70190666-70193332	0.384895	1.17056	1.60466	0.00390495	0.0206877	yes
XLOC_004975	-	chr11:87876986-87879710	0.329691	1.30012	1.97945	0.00063474	0.0045675	yes
XLOC_005009	-	chr11:101503058-101505314	0.183269	1.43877	2.97281	0.000121101	0.00111335	yes
XLOC_005045	-	chr11:113637714-113639395	2.40823	0.740127	-1.70213	5.46886e-05	0.000560082	yes
XLOC_005081	Kif3c	chr12:3365131-3426747	0.734239	2.20593	1.58706	1.38579e-05	0.00016767	yes
XLOC_005084	Dnmt3a	chr12:3806979-3914543	14.6358	30.2159	1.04581	4.22237e-09	1.08484e-07	yes
XLOC_005091	Gm6682	chr12:4788975-4790318	23.24	35.5137	0.611766	0.00136184	0.00866588	yes
XLOC_005092	0610009D07Rik	chr12:4824413-4834465	35.7609	20.4281	-0.807829	1.0376e-05	0.00012947	yes
XLOC_005094	Atad2b	chr12:4924158-5054336	11.3491	17.6131	0.634065	0.000112857	0.00105129	yes
XLOC_005100	Sdc1	chr12:8778201-8800493	11.8999	6.78747	-0.809999	3.58216e-05	0.000387092	yes
XLOC_005103	Wdr35	chr12:8980806-9035653	4.97194	7.48932	0.591027	0.00256089	0.0146585	yes
XLOC_005107	Rdh14	chr12:10397585-10404513	2.12519	4.26248	1.00411	0.00972304	0.043205	yes
XLOC_005109	Smc6	chr12:11272691-11326591	35.3929	49.6258	0.48763	0.00707666	0.0335532	yes
XLOC_005118	Pdia6	chr12:17273390-17331536	93.8837	44.5056	-1.07689	1.93048e-11	7.10602e-10	yes
XLOC_005119	Nol10	chr12:17355298-17436901	20.1555	13.3955	-0.589431	0.000514459	0.00381676	yes
XLOC_005121	Odc1	chr12:17551678-17558308	242.122	150.044	-0.690344	4.21508e-05	0.000446243	yes
XLOC_005123	5730507C01Rik	chr12:18521315-18542060	62.9713	31.8643	-0.982755	8.66703e-10	2.48719e-08	yes
XLOC_005124	Asap2	chr12:21117616-21292098	12.2599	16.8923	0.462419	0.00925985	0.0416944	yes
XLOC_005134	Kidins220	chr12:25659796-25744671	5.5067	11.583	1.07275	4.79562e-09	1.21903e-07	yes
XLOC_005137	Cmpk2	chr12:27154079-27164702	0.385323	1.07395	1.47878	0.00410253	0.0215436	yes
XLOC_005138	Rnaseh1	chr12:29334466-29344456	7.83639	4.3814	-0.838798	0.00310545	0.0171697	yes
XLOC_005139	Adi1	chr12:29360071-29367039	37.0772	26.5452	-0.482082	0.00437063	0.0226593	yes
XLOC_005142	Pxdn	chr12:30622870-30702527	19.8991	10.8942	-0.869144	1.38459e-06	2.15993e-05	yes
XLOC_005147	Lamb1	chr12:31950158-32015604	9.12743	2.25045	-2.02	6.66134e-16	4.53753e-14	yes
XLOC_005151	Nampt	chr12:33505199-33538234	22.0523	16.021	-0.460969	0.00512858	0.0258604	yes
XLOC_005153	Sypl	chr12:33638809-33664367	11.5491	6.30087	-0.874155	1.56854e-07	3.06049e-06	yes
XLOC_005156	Twistnb	chr12:34114477-34128177	27.3015	14.16	-0.947156	9.76227e-07	1.58624e-05	yes
XLOC_005158	Twist1	chr12:34642535-34644696	2.78753	0.443937	-2.65056	1.77488e-07	3.42124e-06	yes
XLOC_005170	Etv1	chr12:39506844-39594824	3.32421	6.39567	0.944083	1.86427e-05	0.000217984	yes
XLOC_005178	-	chr12:50478992-50482903	0.237412	1.13367	2.25554	1.09848e-05	0.000136532	yes
XLOC_005179	Foxg1	chr12:50483869-50487854	38.201	56.7728	0.571592	0.000419611	0.00321785	yes
XLOC_005180	3110039M20Rik	chr12:50490052-50508333	2.84229	11.6687	2.03752	1.91908e-06	2.89819e-05	yes
XLOC_005184	Coch	chr12:52694327-52707741	5.19886	1.4209	-1.87139	1.00353e-09	2.85418e-08	yes
XLOC_005186	Nubpl	chr12:53198732-53411946	29.1206	11.8419	-1.29814	1.69734e-10	5.47873e-09	yes
XLOC_005187	Arhgap5	chr12:53605201-53678541	28.6783	39.4603	0.460444	0.0108739	0.0471432	yes
XLOC_005188	Akap6	chr12:53800369-54252002	0.12318	1.32311	3.4251	3.21965e-14	1.776e-12	yes
XLOC_005189	Npas3	chr12:54349663-55173162	0.287976	4.91668	4.09366	0	0	yes
XLOC_005195	Psma6	chr12:56499811-56519446	184.638	103.791	-0.831023	1.55109e-07	3.03572e-06	yes
XLOC_005205	Sip1	chr12:60114379-60129972	13.1527	7.81939	-0.750235	0.00553298	0.0274441	yes
XLOC_005211	Fam179b	chr12:66066728-66123560	9.76798	6.48345	-0.591298	0.00110134	0.00727678	yes
XLOC_005216	Mgat2	chr12:70285059-70289057	6.51163	3.91253	-0.734917	0.0021552	0.0126478	yes
XLOC_005220	Arf6	chr12:70473136-70476967	30.5221	19.7537	-0.627732	7.75965e-05	0.000757407	yes
XLOC_005228	Frmd6	chr12:71926500-72003221	3.62566	2.0978	-0.789367	0.000497241	0.00370931	yes
XLOC_005230	Psma3	chr12:72075475-72116810	162.025	90.0941	-0.846714	7.0228e-07	1.18435e-05	yes
XLOC_005231	Arid4a	chr12:72116953-72200338	5.10869	11.7842	1.20583	4.48446e-07	7.86774e-06	yes
XLOC_005236	Daam1	chr12:72932064-73093421	2.79355	7.81761	1.48463	2.83817e-12	1.19397e-10	yes
XLOC_005241	Six6	chr12:74040931-74045886	5.21782	0.104588	-5.64066	0	0	yes
XLOC_005244	2210039B01Rik	chr12:74649469-74652973	39.343	20.0769	-0.970571	7.03412e-07	1.18521e-05	yes
XLOC_005247	Snapc1	chr12:75065516-75090843	6.75224	3.74254	-0.851347	0.00118969	0.00774292	yes
XLOC_005253	Mthfd1	chr12:77356218-77420807	20.4878	12.4576	-0.717738	3.70751e-05	0.000398907	yes
XLOC_005254	Akap5	chr12:77425877-77435952	0.926931	1.94246	1.06735	0.000247964	0.00205289	yes
XLOC_005259	Plekhg3	chr12:77634546-77681451	1.32218	0.281075	-2.2339	1.11427e-09	3.14112e-08	yes
XLOC_005260	Churc1	chr12:77866559-77884165	73.1639	43.8462	-0.738682	8.95199e-05	0.000855467	yes
XLOC_005263	Gphn	chr12:79327641-79785756	6.44863	9.4062	0.544619	0.00609282	0.0296297	yes
XLOC_005266	Eif2s1	chr12:79963058-79987997	73.849	51.8541	-0.51012	0.00145674	0.00917822	yes
XLOC_005271	Exd2	chr12:81564081-81599416	4.05052	8.3934	1.05115	9.81055e-06	0.000122895	yes
XLOC_005273	Galntl1	chr12:81619976-81704883	2.36007	8.3205	1.81784	2.92433e-13	1.44264e-11	yes
XLOC_005278	Smoc1	chr12:82127794-82287401	8.89739	2.90927	-1.61273	1.0989e-12	4.94918e-11	yes
XLOC_005286	Psen1	chr12:85029121-85079801	14.3869	9.5418	-0.592419	0.00471312	0.0240698	yes
XLOC_005295	Dnalc1	chr12:85455277-85484472	1.68934	3.15558	0.901441	0.000317446	0.00254388	yes
XLOC_005297	Zfp410	chr12:85657808-85685389	9.20838	13.663	0.569253	0.00999977	0.0441943	yes
XLOC_005306	Fcf1	chr12:86311879-86324253	87.466	44.6051	-0.971514	6.39158e-08	1.33269e-06	yes
XLOC_005325	Ahsa1	chr12:88607445-88614951	84.0661	40.2374	-1.06299	3.57357e-09	9.2811e-08	yes
XLOC_005339	Flrt2	chr12:96930435-97023551	1.30017	2.55561	0.974966	8.77428e-05	0.000841426	yes
XLOC_005343	Ttc8	chr12:100158783-100221448	4.99972	9.77308	0.966966	3.33521e-05	0.000363964	yes
XLOC_005346	Psmc1	chr12:101348367-101361671	87.7397	62.3652	-0.492489	0.0025033	0.0143771	yes
XLOC_005363	Fam181a	chr12:104553168-104555275	0.105793	1.58326	3.90359	0.00252043	0.0144659	yes
XLOC_005378	Glrx5	chr12:106270894-106279122	66.1294	25.9535	-1.34936	2.52758e-11	9.14563e-10	yes
XLOC_005385	D430019H16Rik	chr12:106692065-106731305	2.92125	6.4212	1.13626	4.77973e-08	1.02566e-06	yes
XLOC_005388	4933433P14Rik	chr12:106923561-106941267	4.37117	2.45247	-0.833784	0.0009956	0.00668659	yes
XLOC_005395	Cyp46a1	chr12:109572590-109600444	0.316101	2.24108	2.82574	0.00388611	0.0206222	yes
XLOC_005402	Dlk1	chr12:110691032-110701546	4.85112	13.0766	1.4306	1.46812e-10	4.78728e-09	yes
XLOC_005452	Dync1h1	chr12:111839604-111905154	18.5349	25.7205	0.472673	0.00338886	0.0184509	yes
XLOC_005458	Traf3	chr12:112404758-112505464	4.07791	6.39115	0.648245	0.00130359	0.00835635	yes
XLOC_005466	Trmt61a	chr12:112916315-112922915	16.8911	10.9696	-0.622753	0.00539383	0.0269073	yes
XLOC_005468	Klc1	chr12:112997059-113052052	14.3723	40.241	1.48538	8.29036e-07	1.37153e-05	yes
XLOC_005471	Aspg	chr12:113344893-113365784	1.11406	0.201014	-2.47046	0.00274243	0.015535	yes
XLOC_005474	Kif26a	chr12:113384418-113419958	1.53842	2.92696	0.927949	0.000402604	0.00310986	yes
XLOC_005484	Pacs2	chr12:114252718-114312612	10.0824	17.5902	0.80294	2.16207e-06	3.20808e-05	yes
XLOC_005487	Crip2	chr12:114378446-114383720	4.07588	15.613	1.93756	3.3842e-09	8.81319e-08	yes
XLOC_005493	Zfp386	chr12:117285932-117305489	11.2341	17.5015	0.639601	0.00302317	0.0167972	yes
XLOC_005494	Vipr2	chr12:117316195-117384734	0.294544	1.41451	2.26375	0.00127793	0.00821411	yes
XLOC_005499	Cdca7l	chr12:119082333-119437516	22.6517	11.1261	-1.02566	3.83915e-07	6.88063e-06	yes
XLOC_005500	Sp8	chr12:120082630-120097170	7.08655	3.24115	-1.12858	6.95258e-07	1.17354e-05	yes
XLOC_005506	Efr3b	chr12:3962553-4038915	1.65759	3.80039	1.19706	1.38159e-06	2.15878e-05	yes
XLOC_005508	Ncoa1	chr12:4247361-4484060	0.724696	3.53523	2.28636	3.20433e-12	1.33917e-10	yes
XLOC_005513	Ubxn2a	chr12:4883523-4914326	5.44796	8.29442	0.606423	0.00803167	0.0372613	yes
XLOC_005528	Fam84a	chr12:14154403-14158844	0.553987	1.32784	1.26115	0.0043461	0.0225566	yes
XLOC_005530	Trib2	chr12:15798532-15823591	2.44787	5.26464	1.10481	3.2953e-06	4.67571e-05	yes
XLOC_005532	Greb1	chr12:16677255-16807753	10.1429	2.08737	-2.2807	0	0	yes
XLOC_005534	2410004P03Rik	chr12:17011763-17018533	1.66805	0.172607	-3.2726	2.18977e-05	0.000252192	yes
XLOC_005543	Id2	chr12:25778663-25780957	29.6851	14.6032	-1.02345	5.37864e-08	1.14392e-06	yes
XLOC_005546	Gm20187	chr12:27775101-27799860	0.417682	1.78625	2.09646	0.00536519	0.0267714	yes
XLOC_005548	Sox11	chr12:28019132-28027583	81.3853	133.489	0.71388	0.000257502	0.00211812	yes
XLOC_005552	Rps7	chr12:29315711-29320818	437.84	191.053	-1.19643	2.97318e-13	1.46297e-11	yes
XLOC_005558	Acp1	chr12:31569188-31596477	44.9063	30.3243	-0.566445	0.00314514	0.017354	yes
XLOC_005567	Prkar2b	chr12:32643343-32746144	5.22604	9.9899	0.934753	1.32212e-06	2.07773e-05	yes
XLOC_005573	Hdac9	chr12:35056204-35546112	1.07049	2.03346	0.925671	0.00340421	0.0185219	yes
XLOC_005575	Ahr	chr12:36182650-36219661	1.20597	0.495981	-1.28183	3.09554e-05	0.000340331	yes
XLOC_005577	Tspan13	chr12:36741141-36769065	27.1074	41.8524	0.626627	0.000165158	0.00145068	yes
XLOC_005578	Bzw2	chr12:36818421-36883412	49.3777	31.0173	-0.670788	4.48231e-05	0.000471406	yes
XLOC_005581	Arl4a	chr12:40759877-40764574	1.66484	3.09623	0.895132	0.00034998	0.00275904	yes
XLOC_005587	Lrrn3	chr12:41750676-43056573	0.638421	13.1701	4.36661	0.002568	0.0146904	yes
XLOC_005590	Nova1	chr12:47795503-47919762	3.75405	7.58006	1.01376	5.75706e-09	1.44047e-07	yes
XLOC_005593	Strn3	chr12:52709527-52839942	28.355	41.9761	0.565967	0.00193185	0.0115087	yes
XLOC_005599	Egln3	chr12:55279967-55304861	3.13476	1.52159	-1.04278	0.0066813	0.0319448	yes
XLOC_005601	1110002B05Rik	chr12:55746360-55757559	21.2691	14.5	-0.552702	0.00309047	0.0171215	yes
XLOC_005602	Eapp	chr12:55774453-55796852	17.7066	10.5667	-0.74476	0.000956503	0.00646712	yes
XLOC_005603	Snx6	chr12:55846407-55896683	47.0829	32.1866	-0.548742	0.00118151	0.00770535	yes
XLOC_005605	Baz1a	chr12:55993346-56087323	15.5463	23.4074	0.590394	0.000257708	0.0021189	yes
XLOC_005611	E030019B13Rik	chr12:57591414-57630409	0.700431	4.76563	2.76635	3.43059e-05	0.000372885	yes
XLOC_005612	Nkx2-1	chr12:57632923-57637895	2.45287	14.7198	2.58522	0	0	yes
XLOC_005613	Nkx2-9	chr12:57712383-57714271	5.67227	1.14971	-2.30265	0.000605419	0.00439618	yes
XLOC_005619	Fbxo33	chr12:60301565-60320470	4.3348	2.4211	-0.840303	0.00268784	0.0152755	yes
XLOC_005626	Mdga2	chr12:67567045-68323563	0.49895	1.67622	1.74825	0.00711151	0.0337018	yes
XLOC_005628	Rps29	chr12:70258708-70260173	1517.79	711.9	-1.09223	6.7093e-12	2.65886e-10	yes
XLOC_005629	Rpl36al	chr12:70283720-70285054	602.396	344.735	-0.805224	5.38163e-07	9.28016e-06	yes
XLOC_005634	Mettl21d	chr12:70677536-70684015	8.10767	3.74308	-1.11506	0.00125006	0.00806453	yes
XLOC_005636	L2hgdh	chr12:70791422-70825861	16.4654	10.9168	-0.592883	0.000494694	0.00369592	yes
XLOC_005641	Nin	chr12:71112420-71212940	2.6227	4.43957	0.75937	0.000767022	0.00538636	yes
XLOC_005643	Trim9	chr12:71345444-71448601	0.329347	2.82348	3.0998	1.29026e-07	2.55926e-06	yes
XLOC_005645	Timm9	chr12:72212414-72237679	33.267	16.9876	-0.969608	0.000163222	0.00143775	yes
XLOC_005647	2810055F11Rik	chr12:73172601-73186374	1.0489	2.91861	1.4764	0.0102153	0.0448549	yes
XLOC_005649	Rtn1	chr12:73312738-73509926	7.01495	36.8505	2.39318	0	0	yes
XLOC_005651	4930447C04Rik	chr12:73981956-74018752	2.1462	0.692943	-1.63098	0.00966802	0.0430262	yes
XLOC_005652	Six1	chr12:74141903-74147699	2.15368	0.169115	-3.67072	2.97548e-09	7.82331e-08	yes
XLOC_005653	Six4	chr12:74200593-74374975	7.60001	3.22981	-1.23455	7.50306e-08	1.53929e-06	yes
XLOC_005654	Trmt5	chr12:74378979-74387750	15.5591	9.59317	-0.697683	0.00195624	0.0116359	yes
XLOC_005659	Ppp2r5e	chr12:76550452-76697187	12.0287	16.4409	0.450807	0.00883849	0.0402708	yes
XLOC_005660	Wdr89	chr12:76731580-76770524	48.9696	21.073	-1.21649	8.79455e-08	1.78134e-06	yes
XLOC_005670	Max	chr12:78038255-78063235	75.8179	47.3485	-0.679221	0.0039369	0.0208281	yes
XLOC_005671	Atp6v1d	chr12:79943968-79962625	29.6865	20.29	-0.549037	0.00643575	0.0309444	yes
XLOC_005675	Vti1b	chr12:80231774-80273445	21.9276	13.7467	-0.673663	0.000829712	0.00575626	yes
XLOC_005678	Zfp36l1	chr12:81208746-81214000	64.3456	45.4024	-0.503071	0.00144503	0.00912247	yes
XLOC_005681	Dcaf5	chr12:81436818-81537588	5.46951	10.8007	0.981642	1.55522e-07	3.03904e-06	yes
XLOC_005683	Erh	chr12:81735009-81744848	371.191	204.089	-0.862962	4.70892e-08	1.0116e-06	yes
XLOC_005685	Gm1568	chr12:81850817-81861891	2.33568	3.50045	0.583698	0.0106827	0.0464301	yes
XLOC_005689	Slc8a3	chr12:82298901-82434167	1.91317	0.478852	-1.99832	2.05058e-09	5.5204e-08	yes
XLOC_005695	Map3k9	chr12:82815936-82882157	2.97424	1.66133	-0.840177	0.000421895	0.00323149	yes
XLOC_005701	C130039O16Rik	chr12:85490122-85559831	6.75929	4.08389	-0.726926	0.000168311	0.00147107	yes
XLOC_005716	Tmed10	chr12:86681563-86715667	29.2823	22.0995	-0.406016	0.0108954	0.0471684	yes
XLOC_005720	6430527G18Rik	chr12:88221652-88225764	0.96464	4.354	2.17428	1.92756e-10	6.18013e-09	yes
XLOC_005738	4930534B04Rik	chr12:92236931-92786285	3.75855	8.21757	1.12854	6.43238e-08	1.33974e-06	yes
XLOC_005741	Ston2	chr12:92871345-93024876	4.85837	7.20133	0.567792	0.000944969	0.00640271	yes
XLOC_005744	Galc	chr12:99440482-99497547	3.16374	5.35597	0.759518	0.0026166	0.0149238	yes
XLOC_005745	Kcnk10	chr12:99667640-99816228	0.310642	2.74069	3.14121	1.02728e-05	0.000128265	yes
XLOC_005746	Ptpn21	chr12:99914949-99975644	1.49493	3.53683	1.24238	2.00432e-06	3.009e-05	yes
XLOC_005747	Eml5	chr12:99985177-100139694	4.48974	10.3908	1.2106	1.23691e-07	2.46593e-06	yes
XLOC_005751	2610021K21Rik	chr12:100955740-101121652	3.6292	6.6866	0.881621	0.000586407	0.00427272	yes
XLOC_005754	Rps6ka5	chr12:101786403-101963278	1.3406	0.777874	-0.785267	0.00766541	0.0358381	yes
XLOC_005764	Lgmn	chr12:103632307-103677907	5.50875	3.16443	-0.79978	0.00450864	0.0232426	yes
XLOC_005765	Itpk1	chr12:103806761-103943079	3.84429	6.96894	0.858221	0.00359695	0.0193343	yes
XLOC_005770	-	chr12:104550586-104552994	1.43509	15.2865	3.41304	0.000536096	0.0039543	yes
XLOC_005799	Bcl11b	chr12:109148612-109241624	0.014672	2.3827	7.34339	7.56744e-08	1.54918e-06	yes
XLOC_005813	Cinp	chr12:112110819-112127458	19.9907	11.6013	-0.785042	0.00311811	0.0172297	yes
XLOC_005818	Ckb	chr12:112907565-112910549	1.24211	118.025	6.57016	0	0	yes
XLOC_005823	2010107E04Rik	chr12:113199586-113205188	162.786	90.7103	-0.843634	1.34549e-05	0.000163518	yes
XLOC_005828	Akt1	chr12:113892031-113912487	10.7106	17.9067	0.741459	0.000377653	0.00295047	yes
XLOC_005838	Dnahc11	chr12:119082333-119437516	12.3906	5.23846	-1.24203	2.57658e-05	0.000289938	yes
XLOC_005842	Itgb8	chr12:120396404-120477384	1.84542	9.30322	2.33378	2.44249e-15	1.52286e-13	yes
XLOC_005882	-	chr12:18068558-18070226	1.55177	3.98976	1.36239	0.000465706	0.0035081	yes
XLOC_005885	-	chr12:18075227-18076063	0.131352	1.34283	3.35376	0.00982759	0.0435944	yes
XLOC_005896	-	chr12:20919967-20920776	1.39168	0.318068	-2.12942	0.0102997	0.0451447	yes
XLOC_005897	-	chr12:20923315-20925442	4.30686	1.43626	-1.58432	2.08061e-07	3.95875e-06	yes
XLOC_005898	-	chr12:20926580-20927149	1.71622	0.270667	-2.66464	0.0107648	0.046723	yes
XLOC_005901	-	chr12:21048787-21050694	0.641917	2.43044	1.92076	0.000206436	0.00174995	yes
XLOC_005908	-	chr12:21390477-21392680	0.3396	1.04777	1.62542	0.0105598	0.0460789	yes
XLOC_005915	-	chr12:22013175-22013829	1.54957	5.20034	1.74674	0.00454815	0.0233972	yes
XLOC_005939	-	chr12:33061343-33063450	0.459509	1.52325	1.72899	0.00247316	0.0142415	yes
XLOC_006021	-	chr12:74053335-74057195	1.06655	0.03574	-4.89927	2.35714e-09	6.31905e-08	yes
XLOC_006120	-	chr12:111426443-111428864	0.00614459	1.7649	8.16605	0.000728125	0.00513713	yes
XLOC_006163	Klf6	chr13:5860734-5869642	4.95233	3.28788	-0.590951	0.0106825	0.0464301	yes
XLOC_006164	Pitrm1	chr13:6547386-6647970	40.6639	26.3374	-0.626636	0.000202174	0.00172068	yes
XLOC_006169	Dip2c	chr13:9275770-9668550	1.93326	2.85843	0.564185	0.00998517	0.0441455	yes
XLOC_006171	Heatr1	chr13:12487641-12531160	28.7582	17.0012	-0.758332	1.52663e-06	2.35845e-05	yes
XLOC_006174	Nid1	chr13:13529868-13604542	1.35197	3.46288	1.35691	6.75749e-08	1.39984e-06	yes
XLOC_006179	Arid4b	chr13:14156058-14291870	10.427	16.5159	0.663526	8.50434e-05	0.000818821	yes
XLOC_006180	Psma2	chr13:14705508-14717940	138.793	88.7474	-0.645159	7.02679e-05	0.000692941	yes
XLOC_006193	Trim27	chr13:21271799-21289893	16.2596	10.1933	-0.673664	0.000122712	0.00112545	yes
XLOC_006201	Hist1h3h	chr13:21809496-21810705	56.6498	29.8879	-0.922508	0.000492277	0.00368315	yes
XLOC_006202	Hist1h2bm	chr13:21813966-21814347	1197.66	526.305	-1.18625	6.55032e-14	3.48277e-12	yes
XLOC_006204	Hist1h2bn	chr13:21845991-21846372	215.53	120.355	-0.840592	7.80203e-06	0.000100093	yes
XLOC_006205	Hist1h2bp	chr13:21879356-21881082	46.1002	26.342	-0.807411	0.0006213	0.00449275	yes
XLOC_006207	Hist1h4m	chr13:21903614-21904019	17.0675	3.47834	-2.29478	4.74321e-06	6.38915e-05	yes
XLOC_006208	Hist1h2br	chr13:21925611-21929399	8.14706	3.97022	-1.03706	7.35261e-06	9.48997e-05	yes
XLOC_006211	Hist1h2bk	chr13:22127755-22128136	426.932	250.092	-0.771547	4.03488e-06	5.55623e-05	yes
XLOC_006236	Hist1h3g	chr13:23627286-23630170	110.535	46.9416	-1.23556	1.5054e-08	3.53556e-07	yes
XLOC_006237	Hist1h3f	chr13:23635920-23636923	3.09321	1.28881	-1.26307	0.0079102	0.0368302	yes
XLOC_006238	Hist1h4d	chr13:23643200-23856283	1591.82	434.53	-1.87315	5.28941e-09	1.33041e-07	yes
XLOC_006262	Gpld1	chr13:25035020-25112248	4.78634	7.64464	0.675525	0.000251276	0.00207492	yes
XLOC_006297	Nqo2	chr13:34009786-34127039	1.75142	3.89206	1.15201	0.000149153	0.00132603	yes
XLOC_006305	Cdyl	chr13:35751730-35966003	8.30928	4.98472	-0.737211	0.000408183	0.00314281	yes
XLOC_006309	Rreb1	chr13:37917906-38043875	2.74371	1.59626	-0.781431	0.00166592	0.0102334	yes
XLOC_006310	Riok1	chr13:38128857-38153302	16.3408	11.9794	-0.447928	0.0105063	0.0458925	yes
XLOC_006311	Dsp	chr13:38243162-38290446	1.9461	0.250211	-2.95937	0	0	yes
XLOC_006313	Bmp6	chr13:38437584-38591597	0.115048	2.66739	4.53512	1.26419e-06	2.00148e-05	yes
XLOC_006315	Pak1ip1	chr13:41096378-41108402	21.3887	14.931	-0.518535	0.00588401	0.0288119	yes
XLOC_006318	Tmem170b	chr13:41701584-41736726	3.21249	6.41794	0.998417	3.24441e-08	7.19597e-07	yes
XLOC_006322	Edn1	chr13:42396638-42403358	5.71304	0.0461267	-6.95251	4.44089e-15	2.70711e-13	yes
XLOC_006326	Rnf182	chr13:43711165-43766313	0.394752	2.60292	2.72111	7.28689e-09	1.80205e-07	yes
XLOC_006338	Kdm1b	chr13:47138907-47179982	3.85494	5.65589	0.553044	0.0067187	0.0320865	yes
XLOC_006341	Id4	chr13:48356486-48362158	0.974828	92.7529	6.5721	0	0	yes
XLOC_006345	Bicd2	chr13:49436917-49482871	4.24558	7.17264	0.756544	0.000374061	0.00293078	yes
XLOC_006351	Nol8	chr13:49748718-49774384	24.2671	15.0494	-0.689298	1.49871e-05	0.000178957	yes
XLOC_006360	S1pr3	chr13:51503986-51518166	0.308206	2.60885	3.08145	2.1645e-10	6.89361e-09	yes
XLOC_006363	Gadd45g	chr13:51942043-51943845	0.122335	15.411	6.97698	1.21541e-05	0.000149417	yes
XLOC_006369	Cplx2	chr13:54407397-54485279	2.01069	3.97482	0.983201	9.59686e-05	0.000908025	yes
XLOC_006373	Faf2	chr13:54723144-54765424	10.0344	6.95097	-0.529671	0.00702334	0.0333417	yes
XLOC_006381	Prelid1	chr13:55423415-55431091	136.761	81.1537	-0.752924	4.50113e-06	6.10604e-05	yes
XLOC_006386	Tmed9	chr13:55694495-55699055	45.1108	25.1563	-0.842556	2.47946e-06	3.63394e-05	yes
XLOC_006398	Smad5	chr13:56804370-56843739	11.1497	19.4343	0.801598	2.52556e-06	3.69021e-05	yes
XLOC_006401	Ntrk2	chr13:58907956-59231328	0.649054	5.42457	3.0631	0	0	yes
XLOC_006418	Habp4	chr13:64263173-64287845	1.39712	3.22233	1.20565	0.00168493	0.0103171	yes
XLOC_006439	Nsun2	chr13:69750664-69774657	34.2323	15.7237	-1.12242	4.29656e-12	1.76482e-10	yes
XLOC_006440	Med10	chr13:69948759-69954972	20.7404	13.5194	-0.617419	0.0102979	0.0451447	yes
XLOC_006446	Mrpl36	chr13:73468456-73469626	51.1371	31.7593	-0.687191	0.000270315	0.00221115	yes
XLOC_006447	Lpcat1	chr13:73604705-73653866	29.7308	21.7057	-0.453888	0.00513924	0.0259005	yes
XLOC_006453	Brd9	chr13:74075285-74098343	7.04384	10.8995	0.629829	0.00281323	0.015861	yes
XLOC_006461	Ell2	chr13:75844931-75909806	1.88117	1.10046	-0.773515	0.00565905	0.0279391	yes
XLOC_006462	Glrx	chr13:75977333-75987599	13.4998	3.98317	-1.76095	9.79417e-12	3.70494e-10	yes
XLOC_006467	Fam172a	chr13:77847950-78305501	7.15953	12.3433	0.785797	1.87299e-05	0.00021887	yes
XLOC_006469	A830082K12Rik	chr13:78328232-78375877	1.86705	4.96382	1.41069	0.000177209	0.00152653	yes
XLOC_006474	Cetn3	chr13:81922290-81936156	167.607	119.081	-0.493134	0.00284046	0.0159836	yes
XLOC_006475	Mef2c	chr13:83643032-83806687	2.34121	1.19627	-0.968706	4.8137e-05	0.000502668	yes
XLOC_006476	C130071C03Rik,Mir9-2	chr13:83854743-83883502	0.14217	24.1482	7.40815	0	0	yes
XLOC_006480	Edil3	chr13:88961076-89462830	0.171549	1.04303	2.60409	6.94891e-06	9.02368e-05	yes
XLOC_006481	Hapln1	chr13:89680240-89751437	0.894524	1.48729	0.733495	0.0100902	0.0444853	yes
XLOC_006482	Tmem167	chr13:90229217-90258970	28.789	16.7678	-0.779825	0.00230112	0.013404	yes
XLOC_006483	Rps23	chr13:91062726-91064337	2374.07	1239.52	-0.937578	1.41757e-07	2.79729e-06	yes
XLOC_006484	Ssbp2	chr13:91600701-91925753	2.96429	5.53722	0.901474	1.48281e-05	0.000177391	yes
XLOC_006488	Serinc5	chr13:93381092-93481901	0.895554	2.3918	1.41724	1.14157e-06	1.82241e-05	yes
XLOC_006494	Arsb	chr13:94541633-94712971	0.475093	2.38121	2.32541	5.78419e-08	1.22337e-06	yes
XLOC_006495	Lhfpl2	chr13:94827750-94966076	1.7319	3.70034	1.0953	4.97513e-05	0.000516987	yes
XLOC_006512	Foxd1	chr13:99124199-99126660	2.20901	0.474115	-2.22009	9.07726e-06	0.000114837	yes
XLOC_006516	Smn1	chr13:100893159-100907653	32.7545	18.3638	-0.834833	7.99923e-05	0.000777619	yes
XLOC_006537	Pde4d	chr13:109444370-110746177	0.435498	1.26081	1.53362	4.54645e-06	6.16315e-05	yes
XLOC_006540	Plk2	chr13:111185251-111191051	0.516408	1.85455	1.84449	0.00011069	0.00103251	yes
XLOC_006559	Emb	chr13:118009379-118063222	71.3069	21.1244	-1.75513	0	0	yes
XLOC_006562	Fgf10	chr13:119503505-119581380	2.52661	0.038099	-6.0513	0	0	yes
XLOC_006565	Gm7120	chr13:120275704-120284312	3.24364	7.97825	1.29846	0.0067167	0.032085	yes
XLOC_006568	Net1	chr13:3881808-3917466	26.8722	16.6813	-0.687884	3.63401e-05	0.000391879	yes
XLOC_006573	Akr1e1	chr13:4591735-4608410	4.63904	14.5472	1.64884	7.53531e-12	2.92562e-10	yes
XLOC_006578	Zmynd11	chr13:9684081-9764590	20.2909	27.8942	0.459132	0.0061959	0.0300401	yes
XLOC_006584	Edaradd	chr13:12563475-12612717	1.04845	0.115568	-3.18145	5.55112e-16	3.86378e-14	yes
XLOC_006585	Gpr137b-ps	chr13:12658149-12742702	3.19849	6.0237	0.91326	0.000917652	0.00625972	yes
XLOC_006592	Mrpl32	chr13:14702567-14705304	27.1773	17.9567	-0.597886	0.00894847	0.0406239	yes
XLOC_006621	Hist1h2bl	chr13:21807631-21808012	641.372	421.082	-0.60706	0.000154749	0.00137195	yes
XLOC_006627	Hist1h2br	chr13:21898280-21902068	7.1225	4.71879	-0.593967	0.0103651	0.0453792	yes
XLOC_006628	Hist1h4n	chr13:21923715-21924027	22.521	6.20441	-1.85991	0.000297465	0.00240128	yes
XLOC_006629	Hist1h2ao	chr13:21924930-21925444	32.233	18.345	-0.813148	0.00588872	0.0288203	yes
XLOC_006633	Hist1h4i	chr13:22131700-22133221	15.0598	6.04096	-1.31785	0.00301243	0.0167619	yes
XLOC_006656	Hist1h2bh	chr13:23634840-23635221	98.7159	60.4494	-0.707553	0.00165379	0.0101687	yes
XLOC_006672	Gmnn	chr13:24843713-24853806	61.2079	26.6219	-1.2011	2.15479e-11	7.84121e-10	yes
XLOC_006674	Acot13	chr13:24909823-24923358	6.65214	14.9761	1.17077	0.000546569	0.00402225	yes
XLOC_006675	Aldh5a1	chr13:24997468-25029530	3.00699	17.1818	2.51449	0	0	yes
XLOC_006708	Tubb2a	chr13:34166146-34169877	1.18697	9.49822	3.00037	1.98481e-10	6.35306e-09	yes
XLOC_006710	Tubb2b	chr13:34218876-34222223	12.5726	86.4492	2.78157	0	0	yes
XLOC_006711	Slc22a23	chr13:34270855-34437051	3.79125	9.76445	1.36487	2.77987e-11	1.00206e-09	yes
XLOC_006715	Eci2	chr13:35069614-35086013	11.1886	24.2206	1.11421	4.45747e-06	6.05969e-05	yes
XLOC_006716	Rpp40	chr13:35985409-35998228	6.61396	3.85456	-0.778949	0.000831701	0.00576797	yes
XLOC_006718	Nrn1	chr13:36817494-36826323	0.103736	3.37815	5.02525	2.76496e-06	3.99427e-05	yes
XLOC_006723	Txndc5	chr13:38592143-38620329	25.7814	11.7799	-1.13	2.77673e-10	8.74166e-09	yes
XLOC_006725	Eef1e1	chr13:38737559-38750897	31.0564	16.8156	-0.885084	4.71536e-06	6.36059e-05	yes
XLOC_006728	Tfap2a	chr13:40810364-40829214	6.19797	1.23979	-2.3217	0	0	yes
XLOC_006732	Nedd9	chr13:41405284-41582689	2.50781	8.13107	1.69701	2.47691e-12	1.0489e-10	yes
XLOC_006740	Atxn1	chr13:45645124-46060360	0.272898	1.09237	2.00102	1.42298e-08	3.35847e-07	yes
XLOC_006742	Kif13a	chr13:46844456-47025087	3.33937	6.10803	0.871131	4.07324e-05	0.000432663	yes
XLOC_006743	Nhlrc1	chr13:47107925-47110219	0.0537343	2.45371	5.51298	2.75563e-06	3.98537e-05	yes
XLOC_006744	Tpmt	chr13:47118911-47138586	3.69699	7.27601	0.976795	5.28494e-05	0.000544744	yes
XLOC_006748	A330048O09Rik	chr13:48367786-48369253	0.0553661	1.66875	4.91362	0.0030872	0.0171083	yes
XLOC_006751	Ptpdc1	chr13:48673240-48720942	1.1111	2.39238	1.10646	0.00443743	0.0229435	yes
XLOC_006752	Phf2	chr13:48897115-48966254	4.94034	13.2911	1.42778	6.70353e-13	3.11437e-11	yes
XLOC_006754	Wnk2	chr13:49131670-49243383	1.44814	5.39011	1.89612	3.36198e-12	1.3984e-10	yes
XLOC_006765	Shc3	chr13:51518472-51664823	0.273835	2.93368	3.42133	2.22045e-16	1.5978e-14	yes
XLOC_006766	Sema4d	chr13:51796616-51889013	6.5491	3.37829	-0.955005	3.84002e-06	5.3417e-05	yes
XLOC_006771	Nfil3	chr13:53062577-53076408	2.84928	1.24902	-1.1898	0.00114547	0.0075036	yes
XLOC_006772	Ror2	chr13:53204685-53381478	4.70072	2.57344	-0.869183	0.000492408	0.00368315	yes
XLOC_006776	Thoc3	chr13:54560197-54570201	27.0324	17.0417	-0.665623	0.000127121	0.00115868	yes
XLOC_006778	Nop16	chr13:54685551-54691435	26.8482	9.67505	-1.47248	1.16795e-13	6.04211e-12	yes
XLOC_006780	Rnf44	chr13:54780755-54795321	43.4357	27.3456	-0.667572	0.000184882	0.00158479	yes
XLOC_006798	Neurog1	chr13:56351859-56353524	0.133365	3.89121	4.86677	2.19994e-05	0.000253212	yes
XLOC_006807	Ubqln1	chr13:58277516-58317014	38.4693	26.453	-0.540278	0.000823534	0.00572453	yes
XLOC_006809	Kif27	chr13:58386992-58456673	0.489293	1.61392	1.7218	9.36445e-05	0.00088823	yes
XLOC_006822	Zcchc6	chr13:59871326-59924508	7.18332	13.0257	0.858639	8.63194e-06	0.000109783	yes
XLOC_006823	Gas1	chr13:60275765-60278896	17.0396	33.7377	0.985469	7.39942e-09	1.82281e-07	yes
XLOC_006840	A130040M12Rik	chr13:62184506-62397849	9.29907	16.4524	0.823144	0.000151242	0.00134273	yes
XLOC_006853	Ptch1	chr13:63609361-63674495	11.4393	16.1906	0.501159	0.00272546	0.0154618	yes
XLOC_006857	Cdc14b	chr13:64293851-64376296	8.59181	3.71982	-1.20773	1.85326e-09	5.01743e-08	yes
XLOC_006859	Ctsl	chr13:64464521-64471614	70.4817	27.9332	-1.33527	0	0	yes
XLOC_006865	Uqcrb	chr13:67001556-67006286	69.6849	36.1073	-0.948556	3.98682e-06	5.50193e-05	yes
XLOC_006877	Zfp874b	chr13:67572448-67585189	1.54417	0.882876	-0.806552	0.00653702	0.031344	yes
XLOC_006887	Mtrr	chr13:68699656-68720998	5.42873	3.64265	-0.575625	0.00971308	0.0431765	yes
XLOC_006896	Irx1	chr13:72095679-72101171	1.18289	0.0240336	-5.62112	0.000338724	0.00268246	yes
XLOC_006899	Ndufs6	chr13:73457318-73465930	71.9155	35.3314	-1.02535	3.31086e-05	0.000361719	yes
XLOC_006904	Trip13	chr13:74049909-74075215	52.1922	39.0217	-0.419557	0.00872135	0.0398414	yes
XLOC_006908	Pdcd6	chr13:74440568-74454774	24.7517	16.252	-0.606907	0.00125326	0.00807973	yes
XLOC_006911	Zfp72	chr13:74506310-74516318	1.96007	0.708692	-1.46768	0.000941374	0.00638966	yes
XLOC_006912	Zfp825	chr13:74616138-74631417	16.2891	9.7217	-0.744623	0.00054682	0.00402255	yes
XLOC_006919	Ankrd32	chr13:77182348-77274729	3.6305	5.73432	0.659453	0.000976632	0.00658925	yes
XLOC_006920	Nr2f1	chr13:78328232-78375877	5.65932	32.5937	2.52589	0	0	yes
XLOC_006921	Gpr98	chr13:81234066-81772143	3.22798	5.02841	0.639468	0.00708375	0.0335785	yes
XLOC_006922	Polr3g	chr13:81812835-81850012	15.3543	5.15364	-1.57498	0	0	yes
XLOC_006924	Cox7c	chr13:86184402-86186400	781.095	416.531	-0.907075	9.64877e-09	2.34672e-07	yes
XLOC_006931	Zcchc9	chr13:91936137-91947301	40.186	26.6285	-0.593722	0.00442481	0.0228906	yes
XLOC_006953	Iqgap2	chr13:96397130-96661896	5.89067	17.1721	1.54356	0	0	yes
XLOC_006957	Hmgcr	chr13:97418915-97440891	17.9232	29.6964	0.728455	7.34487e-06	9.48638e-05	yes
XLOC_006962	Utp15	chr13:99016799-99032947	20.2681	11.9648	-0.760411	3.51798e-06	4.94766e-05	yes
XLOC_006963	Btf3	chr13:99079851-99086961	353.096	179.061	-0.979607	1.17903e-09	3.30421e-08	yes
XLOC_006971	Ptcd2	chr13:100089603-100114633	17.6969	10.4631	-0.758189	0.000125491	0.0011471	yes
XLOC_006973	Mtap1b	chr13:100191418-100286557	48.286	138.013	1.51513	6.88338e-14	3.64972e-12	yes
XLOC_006983	Marveld2	chr13:101365911-101386926	2.67499	1.17208	-1.19046	0.00184878	0.0111293	yes
XLOC_006985	Cdk7	chr13:101439435-101500897	8.57427	4.13066	-1.05364	1.17699e-09	3.30334e-08	yes
XLOC_006986	Mrps36	chr13:101505894-101514614	31.8738	19.7088	-0.693531	0.00149189	0.00935352	yes
XLOC_006994	Erbb2ip	chr13:104608723-104710702	16.2845	34.5999	1.08727	2.99987e-11	1.07731e-09	yes
XLOC_007010	Map3k1	chr13:112536618-112599191	9.71029	6.79758	-0.514493	0.00575131	0.0282924	yes
XLOC_007014	Gpx8	chr13:113832938-113836618	5.00224	16.5172	1.72332	9.37899e-07	1.53046e-05	yes
XLOC_007018	Snx18	chr13:114382386-114408772	14.4041	8.44189	-0.770843	6.91198e-06	8.98182e-05	yes
XLOC_007025	Pelo	chr13:115745025-115892172	8.88934	4.39122	-1.01745	0.000912832	0.00624019	yes
XLOC_007026	Isl1	chr13:117088477-117099896	0.446411	2.32538	2.38102	2.06199e-06	3.0859e-05	yes
XLOC_007030	Nnt	chr13:120123123-120198174	11.0792	17.4748	0.657425	0.000269067	0.00220189	yes
XLOC_007036	-	chr13:8964514-8969584	0.640677	1.90463	1.57184	4.28686e-06	5.86524e-05	yes
XLOC_007224	-	chr13:83854743-83883502	0.0490024	4.10777	6.38936	1.109e-06	1.77634e-05	yes
XLOC_007232	-	chr13:84164855-84165310	0	2.80736	1.79769e+308	2.92003e-05	0.000324075	yes
XLOC_007238	-	chr13:85266328-85267120	42.8491	64.6917	0.594314	0.00169279	0.0103586	yes
XLOC_007342	4930555G01Rik	chr14:5153653-5162268	3.95881	6.39037	0.690832	0.00377638	0.0201404	yes
XLOC_007351	Flnb	chr14:8650470-8784101	9.33643	15.891	0.767262	3.2079e-06	4.56524e-05	yes
XLOC_007362	Atxn7	chr14:14845004-14939815	3.04904	5.92717	0.95899	3.92607e-07	7.01671e-06	yes
XLOC_007368	Top2b	chr14:17197719-17263301	38.0755	88.8372	1.2223	8.59313e-13	3.92556e-11	yes
XLOC_007371	Nid2	chr14:20570478-20643045	8.3763	4.3029	-0.961003	0.00446697	0.0230775	yes
XLOC_007372	Nudt13	chr14:21113911-21136797	0.212514	1.83278	3.10841	0.0107161	0.0465541	yes
XLOC_007377	Chchd1	chr14:21514189-21523649	58.8525	30.6644	-0.940541	0.000329627	0.00262236	yes
XLOC_007380	Vcl	chr14:21748654-21852895	10.2306	6.42759	-0.670536	0.000114731	0.00106595	yes
XLOC_007381	Adk	chr14:21871795-22267791	22.1196	12.6452	-0.806731	9.22017e-06	0.000116491	yes
XLOC_007382	Myst4	chr14:22318991-22491700	5.40176	20.4176	1.91831	2.87992e-13	1.42441e-11	yes
XLOC_007384	Vdac2	chr14:22650782-22668132	95.6092	55.0232	-0.797111	5.61284e-07	9.62682e-06	yes
XLOC_007387	Rps24	chr14:25309902-25315368	1213.19	630.924	-0.94327	2.87793e-07	5.31723e-06	yes
XLOC_007388	Zmiz1	chr14:26278670-26487504	25.2008	35.7058	0.502689	0.00191935	0.0114556	yes
XLOC_007403	Hesx1	chr14:27813547-27816260	14.768	0.0132554	-10.1217	0.000113587	0.00105645	yes
XLOC_007404	Il17rd	chr14:27852186-27920472	17.3976	9.20658	-0.91815	8.38311e-09	2.04409e-07	yes
XLOC_007408	Wnt5a	chr14:29318379-29339415	4.99771	2.54429	-0.974006	3.30522e-05	0.000361515	yes
XLOC_007414	Tkt	chr14:31362333-31389872	40.9888	26.3289	-0.638582	7.1679e-05	0.000705765	yes
XLOC_007423	Nt5dc2	chr14:31944211-31981827	131.003	90.3539	-0.535936	0.00146274	0.00920091	yes
XLOC_007428	Eaf1	chr14:32308264-32323044	13.5785	6.6631	-1.02705	2.61201e-07	4.88246e-06	yes
XLOC_007434	Parg	chr14:33015156-33119734	16.0721	11.4992	-0.483026	0.00342014	0.0185799	yes
XLOC_007469	Gpr137c	chr14:45839391-45902438	0.288214	1.44456	2.32542	5.63037e-07	9.64825e-06	yes
XLOC_007470	Psmc6	chr14:45949471-45969373	81.8488	60.0953	-0.44571	0.00989051	0.0438089	yes
XLOC_007477	Samd4	chr14:47502639-47725492	1.73871	2.90226	0.739161	0.00335874	0.018337	yes
XLOC_007484	Peli2	chr14:48740543-48880558	7.57787	4.37325	-0.793085	1.23322e-05	0.00015123	yes
XLOC_007487	Otx2os1	chr14:49288468-49413849	1.11615	0.21879	-2.35091	0.00556174	0.0275656	yes
XLOC_007507	Pnp	chr14:51563977-51573087	10.8793	16.2627	0.579982	0.00118484	0.00771659	yes
XLOC_007530	Abhd4	chr14:54873803-54889596	3.46307	8.82338	1.34928	2.13555e-06	3.1746e-05	yes
XLOC_007532	Mrpl52	chr14:55045745-55048587	92.7444	42.0449	-1.14133	1.03654e-06	1.67008e-05	yes
XLOC_007533	Mmp14	chr14:55050440-55061102	4.42429	9.46279	1.09682	4.52031e-05	0.000474881	yes
XLOC_007534	Lrp10	chr14:55082983-55089128	2.69236	5.09907	0.921363	0.00127022	0.00817526	yes
XLOC_007535	Rem2	chr14:55094936-55099271	0.212981	1.35288	2.66723	0.00140246	0.00888302	yes
XLOC_007541	Pabpn1	chr14:55512979-55517764	45.5853	24.7172	-0.883052	3.43412e-07	6.24241e-06	yes
XLOC_007547	Thtpa	chr14:55713620-55725430	2.23526	5.24999	1.23187	6.11063e-05	0.000616247	yes
XLOC_007550	Lrrc16b	chr14:56109929-56127101	0.495	3.03527	2.61632	5.39195e-10	1.60759e-08	yes
XLOC_007561	2610027L16Rik	chr14:56364529-56377901	13.5745	9.09954	-0.577035	0.00208817	0.0123253	yes
XLOC_007578	Sap18	chr14:58417025-58423817	89.5134	51.3584	-0.801505	0.000237749	0.00198117	yes
XLOC_007584	Cab39l	chr14:60059817-60167740	8.36972	5.8978	-0.505001	0.0087984	0.0401072	yes
XLOC_007585	Shisa2	chr14:60244117-60250497	61.6497	22.5137	-1.45329	0	0	yes
XLOC_007587	Fam123a	chr14:60997098-61007032	1.78861	3.24576	0.859718	0.00462588	0.0237129	yes
XLOC_007606	Fam167a	chr14:64055230-64084339	2.0335	6.41541	1.65758	2.08347e-11	7.59612e-10	yes
XLOC_007609	Pinx1	chr14:64479134-64538696	27.6224	19.702	-0.487495	0.0103304	0.0452482	yes
XLOC_007614	A930011O12Rik,Mir124a-1,Mir3078	chr14:65206889-65213759	0.00851108	1.51543	7.47617	0.00157813	0.00977892	yes
XLOC_007621	Pbk	chr14:66424747-66436659	22.5647	44.8374	0.990636	7.7283e-09	1.89651e-07	yes
XLOC_007622	Ccdc25	chr14:66456138-66487572	21.5162	14.8877	-0.531297	0.00714189	0.0338122	yes
XLOC_007625	Trim35	chr14:66914165-66930261	27.3216	37.2886	0.448691	0.00536186	0.026766	yes
XLOC_007626	Stmn4	chr14:66963211-66980517	0.702771	3.88195	2.46566	8.32827e-05	0.000805515	yes
XLOC_007629	Pnma2	chr14:67530044-67539779	2.49149	0.613726	-2.02134	7.06302e-11	2.41416e-09	yes
XLOC_007630	Ebf2	chr14:67852128-68049781	0.0919643	4.0959	5.47696	9.78063e-07	1.58755e-05	yes
XLOC_007635	Stc1	chr14:69647345-69659458	2.06614	1.11431	-0.89079	0.00148421	0.00931149	yes
XLOC_007640	Tnfrsf10b	chr14:70167278-70184223	3.95386	1.74252	-1.18209	0.000102273	0.000959615	yes
XLOC_007647	Reep4	chr14:70945057-70948742	8.07471	4.81928	-0.744593	0.00628725	0.0303517	yes
XLOC_007655	Gm9199	chr14:73425409-73426697	8.36427	0.812762	-3.36333	0	0	yes
XLOC_007657	Lpar6	chr14:73595308-73725598	18.0052	6.14708	-1.55044	3.82107e-08	8.32072e-07	yes
XLOC_007659	Sucla2	chr14:73952570-73995949	21.5898	14.457	-0.578578	0.000908648	0.00621603	yes
XLOC_007665	Lcp1	chr14:75530929-75630649	0.325529	2.53127	2.959	1.14604e-07	2.29461e-06	yes
XLOC_007667	Zc3h13	chr14:75684130-75744233	11.8319	18.6339	0.65525	7.26033e-05	0.000713764	yes
XLOC_007668	Siah3	chr14:75855756-75929731	0	1.38647	1.79769e+308	5.37448e-17	4.13144e-15	yes
XLOC_007670	Tpt1	chr14:76245062-76248110	1248.53	869.695	-0.52165	0.00504309	0.02551	yes
XLOC_007673	Nufip1	chr14:76510697-76537186	9.33437	4.32837	-1.10873	2.13253e-09	5.73297e-08	yes
XLOC_007677	Enox1	chr14:77556569-78121656	1.7622	3.36129	0.931637	0.00349417	0.0188986	yes
XLOC_007679	1300010F03Rik	chr14:79248984-79602117	1.40406	2.97579	1.08367	0.000148265	0.00131997	yes
XLOC_007688	Pcdh17	chr14:84843369-84937541	2.3893	4.03698	0.756685	9.23319e-05	0.000878392	yes
XLOC_007691	Gm5088	chr14:90296030-90299254	6.00228	3.67811	-0.706545	0.00218468	0.0127998	yes
XLOC_007697	Uchl3	chr14:102053183-102095342	77.0628	32.7497	-1.23455	9.9587e-13	4.49574e-11	yes
XLOC_007700	Cln5	chr14:103469432-103479054	11.0202	5.92313	-0.895722	3.67789e-05	0.000396165	yes
XLOC_007710	Mir17,Mir17hg,Mir18,Mir19a,Mir19b-1,Mir20a	chr14:115441457-115445950	33.9383	9.80653	-1.7911	0	0	yes
XLOC_007717	Dnajc3	chr14:119337153-119498656	14.4847	10.1941	-0.506792	0.0113424	0.0487546	yes
XLOC_007722	Ipo5	chr14:121310415-121347266	215.382	129.981	-0.7286	0.000163658	0.00144093	yes
XLOC_007726	Tm9sf2	chr14:122506303-122558825	29.8862	20.1947	-0.565502	0.000426807	0.00326389	yes
XLOC_007728	Zic2	chr14:122874605-122883186	12.8235	5.66057	-1.17978	1.30563e-08	3.10062e-07	yes
XLOC_007740	Pdhb	chr14:8998504-9005506	53.5178	34.5073	-0.633118	0.000142308	0.00127524	yes
XLOC_007746	Fezf2	chr14:13174405-13178379	6.88406	27.5694	2.00174	0	0	yes
XLOC_007747	Cadps	chr14:13205076-13655605	1.70705	3.73804	1.13078	5.21388e-05	0.000537999	yes
XLOC_007752	Lrrc3b	chr14:16190030-16271501	1.40813	0.455846	-1.62716	0.00228488	0.0133176	yes
XLOC_007754	Rarb	chr14:17263353-17407724	1.92115	0.449821	-2.09454	5.1497e-08	1.10135e-06	yes
XLOC_007755	Nr1d2	chr14:19036569-19071620	1.52489	0.738959	-1.04514	0.000860081	0.00594111	yes
XLOC_007756	Rpl15	chr14:19100336-19103500	444.683	322.64	-0.462852	0.0116064	0.0495951	yes
XLOC_007757	Ube2e1	chr14:19103655-19164358	41.4672	30.6386	-0.436621	0.0116036	0.0495951	yes
XLOC_007759	Gm5458	chr14:20413359-20421809	8.19302	2.03645	-2.00834	4.33781e-10	1.31377e-08	yes
XLOC_007760	2700060E02Rik	chr14:20570478-20643045	80.0784	32.6736	-1.29329	9.42801e-13	4.27634e-11	yes
XLOC_007761	Gng2	chr14:20691780-20796471	11.829	21.356	0.852311	4.20352e-07	7.44307e-06	yes
XLOC_007766	Mrps16	chr14:21210452-21212777	25.5241	14.1217	-0.853947	0.0025005	0.0143687	yes
XLOC_007768	Anxa7	chr14:21274482-21299355	2.04607	0.850679	-1.26617	0.000510614	0.00379118	yes
XLOC_007781	Zfp503	chr14:22803183-22808823	7.99124	2.26857	-1.81664	1.33227e-15	8.64438e-14	yes
XLOC_007785	Dlg5	chr14:24953034-25065142	8.14907	12.4163	0.607532	0.00183638	0.0110709	yes
XLOC_007786	Polr3a	chr14:25266867-25306268	6.79578	4.74338	-0.518724	0.00944731	0.0423443	yes
XLOC_007799	Ccdc66	chr14:28242032-28321646	3.41248	6.90886	1.01762	0.0089868	0.0407401	yes
XLOC_007803	Prkcd	chr14:31408529-31439394	7.76675	4.47261	-0.796193	0.00525505	0.0263521	yes
XLOC_007807	Gnl3	chr14:31813011-31832275	82.6847	39.5665	-1.06334	2.94545e-09	7.755e-08	yes
XLOC_007814	Dnahc1	chr14:32073300-32137082	1.19513	2.43807	1.02857	0.00912546	0.041225	yes
XLOC_007821	Timm23	chr14:32993351-33015077	142.949	79.8224	-0.840633	5.27086e-06	7.01596e-05	yes
XLOC_007848	Tspan14	chr14:41718675-41780144	6.78965	10.333	0.605852	0.0093183	0.0419181	yes
XLOC_007866	Fermt2	chr14:46078466-46149740	25.8839	16.1213	-0.683083	2.78443e-05	0.000310768	yes
XLOC_007867	Ddhd1	chr14:46212848-46277818	2.33066	3.75391	0.687653	0.010482	0.0458176	yes
XLOC_007868	Bmp4	chr14:46999198-47010274	1.56437	4.04172	1.36939	0.000418066	0.00320858	yes
XLOC_007869	Cnih	chr14:47395241-47408032	41.3123	28.3828	-0.541553	0.00126852	0.00816971	yes
XLOC_007875	Otx2	chr14:49277441-49287637	93.6522	36.2979	-1.36743	8.65974e-15	5.13177e-13	yes
XLOC_007879	3632451O06Rik	chr14:50301479-50425668	6.9748	2.86572	-1.28325	8.65943e-07	1.42888e-05	yes
XLOC_007901	Tmem55b	chr14:51544623-51550524	45.497	31.2404	-0.542358	0.00111429	0.00734961	yes
XLOC_007912	Ndrg2	chr14:52524945-52533163	0.185186	1.30782	2.82011	0.00139614	0.0088547	yes
XLOC_007923	Sall2	chr14:52930759-52948345	59.7318	23.0039	-1.37662	4.44089e-15	2.70711e-13	yes
XLOC_007931	Dad1	chr14:54855159-54873604	83.4741	56.0251	-0.575255	0.00234999	0.0136431	yes
XLOC_007934	Prmt5	chr14:55126018-55136307	49.8082	35.7217	-0.479582	0.00275363	0.0155892	yes
XLOC_007936	Jub	chr14:55186305-55196498	17.2067	10.1203	-0.765724	2.41522e-05	0.000274198	yes
XLOC_007943	Homez	chr14:55471573-55482995	3.53382	1.81582	-0.960611	5.43644e-05	0.000557773	yes
XLOC_007945	Slc22a17	chr14:55525563-55531969	3.44118	6.39468	0.893968	0.00829523	0.0381815	yes
XLOC_007951	Zfhx2	chr14:55677592-55711238	1.74621	2.6745	0.615044	0.0114253	0.049033	yes
XLOC_007956	Psme2	chr14:56206276-56209938	33.8499	19.0037	-0.83287	0.000275907	0.00224825	yes
XLOC_007957	Ipo4	chr14:56244465-56254515	23.6322	13.3844	-0.820205	4.14864e-06	5.70059e-05	yes
XLOC_007960	Nedd8	chr14:56281103-56290743	167.832	89.8179	-0.901939	1.24049e-07	2.46821e-06	yes
XLOC_007964	Dhrs1	chr14:56357856-56364521	12.378	21.5688	0.80116	0.000224889	0.00188303	yes
XLOC_007967	Ripk3	chr14:56403831-56407694	1.8981	0.260323	-2.86618	1.92751e-06	2.90737e-05	yes
XLOC_007992	N6amt2	chr14:58168434-58190406	12.7013	7.53311	-0.753656	0.00903803	0.0409073	yes
XLOC_007993	Xpo4	chr14:58196963-58284222	27.5284	15.8719	-0.794447	1.19768e-06	1.90563e-05	yes
XLOC_007997	Efha1	chr14:58535116-58618099	16.4005	7.50267	-1.12827	2.62633e-09	6.98203e-08	yes
XLOC_008008	Nupl1	chr14:60836839-60870278	42.6283	27.22	-0.647144	0.000333899	0.00264864	yes
XLOC_008009	Tnfrsf19	chr14:61582670-61665692	5.43525	30.8721	2.50589	0	0	yes
XLOC_008014	6330409N04Rik	chr14:62151683-62175723	5.93776	3.49287	-0.765507	0.00829617	0.0381815	yes
XLOC_008022	Fdft1	chr14:63741298-63796630	14.7462	24.9586	0.759201	0.00051496	0.003819	yes
XLOC_008032	Hmbox1	chr14:65430188-65658672	5.51146	9.64981	0.808065	1.39903e-05	0.000168952	yes
XLOC_008035	Fzd3	chr14:65811171-65881300	35.5474	49.7818	0.485876	0.00802561	0.0372573	yes
XLOC_008039	Scara3	chr14:66538231-66572581	0.970787	1.93048	0.991729	0.00779722	0.036375	yes
XLOC_008045	Dpysl2	chr14:67421700-67487437	59.3118	85.1864	0.522303	0.00129073	0.00828781	yes
XLOC_008046	Bnip3l	chr14:67604076-67627714	84.6483	41.3854	-1.03236	1.58175e-10	5.14029e-09	yes
XLOC_008047	Ppp2r2a	chr14:67632892-67691308	44.8897	29.56	-0.602738	0.000160451	0.0014166	yes
XLOC_008052	Nefm	chr14:68737601-68749428	1.31409	2.60594	0.987735	0.00535571	0.026745	yes
XLOC_008063	2610301G19Rik	chr14:70499951-70553598	8.57241	12.8433	0.583245	0.00287887	0.0161467	yes
XLOC_008068	Slc39a14	chr14:70703205-70751231	4.15675	1.72692	-1.26725	1.03605e-06	1.67008e-05	yes
XLOC_008070	Polr3d	chr14:70838554-70843278	10.437	5.69553	-0.873812	0.00025677	0.00211391	yes
XLOC_008071	Bmp1	chr14:70874361-70920067	1.68489	4.76283	1.49917	3.87588e-06	5.37986e-05	yes
XLOC_008075	Fgf17	chr14:71036001-71042290	2.69495	9.43458	1.8077	1.13951e-05	0.000141357	yes
XLOC_008077	Xpo7	chr14:71054052-71166435	45.1101	25.3433	-0.831845	0.00196563	0.0116824	yes
XLOC_008080	Rb1	chr14:73595308-73725598	4.31728	13.8372	1.68036	5.8876e-11	2.04157e-09	yes
XLOC_008082	Itm2b	chr14:73762038-73785078	7.16228	14.5528	1.02281	2.75672e-06	3.98537e-05	yes
XLOC_008084	Lrch1	chr14:75154479-75347684	0.557573	1.2382	1.15101	0.0062371	0.0301708	yes
XLOC_008088	Slc25a30	chr14:76159525-76186844	10.6603	6.17068	-0.788743	9.78416e-06	0.000122645	yes
XLOC_008090	Gtf2f2	chr14:76295906-76410738	21.1568	13.3823	-0.660797	0.00120518	0.00782242	yes
XLOC_008097	Dnajc15	chr14:78226023-78274724	41.5639	23.7899	-0.80498	0.000146699	0.00130725	yes
XLOC_008104	1190002H23Rik	chr14:79688556-79701442	0.590748	7.09584	3.58636	3.70875e-06	5.19082e-05	yes
XLOC_008112	Diap3	chr14:87055053-87541004	8.25257	5.23435	-0.656831	0.000560405	0.00410671	yes
XLOC_008114	Pcdh9	chr14:93412919-94289857	0.657661	2.26428	1.78364	0.00569855	0.0280907	yes
XLOC_008116	Dach1	chr14:98186065-98568762	4.98106	8.90278	0.837804	1.2032e-05	0.000148106	yes
XLOC_008118	Dis3	chr14:99475852-99653712	31.5192	21.1866	-0.573084	0.00115318	0.00754118	yes
XLOC_008119	Klf12	chr14:100265163-100683947	3.62805	6.10187	0.750058	0.00011042	0.0010305	yes
XLOC_008121	Tbc1d4	chr14:101841576-102008408	2.47742	0.998996	-1.31029	5.7423e-08	1.21586e-06	yes
XLOC_008128	Ednrb	chr14:104213841-104243390	0.473042	6.47857	3.77563	0	0	yes
XLOC_008133	Spry2	chr14:106291163-106296036	19.4117	4.7278	-2.03768	0	0	yes
XLOC_008136	Slitrk1	chr14:109307332-109313456	0.673604	2.07281	1.62162	2.9519e-05	0.000326603	yes
XLOC_008139	Dct	chr14:118412011-118451468	0	1.42454	1.79769e+308	5.69922e-08	1.20807e-06	yes
XLOC_008143	Abcc4	chr14:118881913-119105441	3.53293	1.56935	-1.1707	1.73406e-05	0.00020476	yes
XLOC_008161	-	chr14:7806941-7808747	0.356235	1.25958	1.82204	0.00703722	0.0333828	yes
XLOC_008434	Oxct1	chr15:3970110-4105344	4.42725	37.2665	3.0734	0	0	yes
XLOC_008438	Rpl37	chr15:5066612-5069140	543.331	267.169	-1.02408	3.41768e-10	1.05513e-08	yes
XLOC_008441	Ttc33	chr15:5135546-5171382	8.19639	5.05959	-0.695969	0.00859741	0.0393692	yes
XLOC_008443	Dab2	chr15:6249788-6390711	5.28185	1.9203	-1.45971	8.47419e-10	2.43917e-08	yes
XLOC_008453	1110020G09Rik	chr15:9001008-9040244	13.1613	9.37664	-0.489156	0.0056217	0.0278265	yes
XLOC_008460	Rad1	chr15:10415788-10423446	17.622	8.38108	-1.07217	3.9968e-07	7.11653e-06	yes
XLOC_008481	Zfp622	chr15:25914120-25928237	9.84193	4.38309	-1.16699	3.05889e-08	6.80817e-07	yes
XLOC_008484	Ank	chr15:27396431-27528111	3.96854	2.42465	-0.710833	0.00857292	0.0392758	yes
XLOC_008486	Ctnnd2	chr15:30102347-30959098	5.42736	10.2448	0.916577	1.27706e-06	2.01851e-05	yes
XLOC_008496	Laptm4b	chr15:34167780-34214050	13.8179	6.64989	-1.05514	6.73889e-07	1.14049e-05	yes
XLOC_008497	Matn2	chr15:34236435-34369196	1.71313	0.677501	-1.33834	0.000425321	0.00325512	yes
XLOC_008499	Pop1	chr15:34425065-34460408	4.90823	2.84624	-0.786143	0.00159627	0.00986577	yes
XLOC_008503	Vps13b	chr15:35301300-35860984	5.159	3.75907	-0.456714	0.00835243	0.0383851	yes
XLOC_008504	Polr2k	chr15:36103771-36106767	46.5743	20.2005	-1.20515	4.05616e-06	5.58152e-05	yes
XLOC_008506	Grhl2	chr15:37162790-37293323	1.39718	0.0358829	-5.28308	1.33782e-12	5.9394e-11	yes
XLOC_008509	Atp6v1c1	chr15:38591658-38622199	16.5834	9.88483	-0.746451	6.05176e-05	0.000611599	yes
XLOC_008512	Cthrc1	chr15:38908477-38918665	7.51511	0.8557	-3.13462	1.95399e-14	1.10655e-12	yes
XLOC_008513	Dcaf13	chr15:38944419-38978405	36.6847	22.3035	-0.71791	5.52829e-05	0.00056496	yes
XLOC_008514	Rims2	chr15:39029762-39516390	2.54902	4.42775	0.79663	0.000173685	0.00150362	yes
XLOC_008532	Aard	chr15:51871652-51877269	2.99296	1.0891	-1.45844	0.00069911	0.00495434	yes
XLOC_008534	Med30	chr15:52543999-52561986	16.5678	10.5487	-0.651315	0.00976309	0.0433485	yes
XLOC_008546	D15Ertd621e	chr15:58247022-58289356	25.4916	18.1181	-0.492591	0.00253992	0.0145559	yes
XLOC_008553	Trib1	chr15:59480208-59489895	10.5363	5.52937	-0.930182	2.65018e-06	3.85465e-05	yes
XLOC_008555	Myc	chr15:61816895-61821919	28.7347	2.76289	-3.37855	0	0	yes
XLOC_008570	Bai1	chr15:74346625-74419895	0.454848	4.15056	3.18985	5.60124e-06	7.42474e-05	yes
XLOC_008573	4930572J05Rik	chr15:74551663-74554803	2.00275	0.665554	-1.58936	0.0042497	0.0221584	yes
XLOC_008583	Zfp623	chr15:75771381-75779880	9.03838	5.676	-0.67119	0.00674345	0.0321646	yes
XLOC_008589	Exosc4	chr15:76157826-76161269	13.6049	8.94054	-0.605696	0.0101002	0.0445147	yes
XLOC_008606	Rpl8	chr15:76734500-76736748	628.69	284.628	-1.14327	8.23341e-13	3.77023e-11	yes
XLOC_008619	Cdc42ep1	chr15:78673054-78685959	1.65639	0.18097	-3.19422	2.45724e-06	3.60414e-05	yes
XLOC_008626	H1f0	chr15:78858641-78860930	56.6543	77.3697	0.449582	0.00468293	0.023954	yes
XLOC_008628	Eif3l	chr15:78905652-78924830	135.278	92.2986	-0.551542	0.000477002	0.00358332	yes
XLOC_008630	Polr2f	chr15:78971796-78982197	122.632	66.5173	-0.882538	5.65214e-06	7.48186e-05	yes
XLOC_008633	Maff	chr15:79178107-79189512	1.54769	0.536097	-1.52955	0.0116761	0.0498086	yes
XLOC_008639	Apobec3	chr15:79719961-79739802	4.32428	2.31548	-0.901149	0.00528862	0.0264929	yes
XLOC_008642	Mgat3	chr15:80004150-80045949	1.92771	4.37904	1.18373	4.40969e-06	6.00754e-05	yes
XLOC_008644	Atf4	chr15:80085613-80087971	63.3307	44.6094	-0.505558	0.00197876	0.0117443	yes
XLOC_008648	Tnrc6b	chr15:80541742-80771516	6.32461	9.26648	0.551046	0.000663113	0.00472373	yes
XLOC_008656	L3mbtl2	chr15:81494365-81527717	10.994	7.15791	-0.619104	0.00223289	0.0130424	yes
XLOC_008662	Xrcc6	chr15:81846798-81870514	13.826	8.48959	-0.703617	0.000465135	0.00350555	yes
XLOC_008666	Srebf2	chr15:81977689-82035765	18.8739	28.4996	0.594546	0.00405964	0.0213536	yes
XLOC_008669	Sept3	chr15:82105364-82125287	22.2486	43.3433	0.962095	2.75561e-09	7.28525e-08	yes
XLOC_008680	Mpped1	chr15:83610452-83688904	6.32266	9.91797	0.649515	0.00186387	0.0111943	yes
XLOC_008683	Parvb	chr15:84062472-84146039	2.24194	0.80491	-1.47785	7.51644e-06	9.66233e-05	yes
XLOC_008691	Fbln1	chr15:85036363-85116724	17.8686	12.1527	-0.556156	0.0106371	0.0462736	yes
XLOC_008701	Tbc1d22a	chr15:86043627-86328933	4.12536	2.18662	-0.915814	0.00533881	0.0266746	yes
XLOC_008706	Creld2	chr15:88650075-88657111	23.3511	15.4433	-0.596512	0.00364448	0.0195568	yes
XLOC_008707	Pim3	chr15:88692623-88696156	5.24064	2.32864	-1.17026	7.19944e-05	0.000708506	yes
XLOC_008717	Mapk8ip2	chr15:89284341-89294895	2.43834	8.03635	1.72064	1.11022e-14	6.4592e-13	yes
XLOC_008730	Ano6	chr15:95621273-95805903	3.88272	6.95551	0.841089	7.29756e-05	0.000717056	yes
XLOC_008743	Cacnb3	chr15:98462650-98474961	3.02108	7.41141	1.29469	1.66466e-05	0.000197296	yes
XLOC_008751	Spats2	chr15:98957061-99043666	20.7386	13.593	-0.609449	0.00117642	0.00768067	yes
XLOC_008755	Tmbim6	chr15:99223377-99240480	45.6824	26.4818	-0.786636	3.68889e-06	5.16903e-05	yes
XLOC_008763	Larp4	chr15:99800504-99846789	32.7884	19.129	-0.777425	1.17745e-06	1.875e-05	yes
XLOC_008772	Dazap2	chr15:100446092-100451192	42.6613	64.2834	0.591519	0.000318459	0.0025494	yes
XLOC_008789	Krt18	chr15:101858646-101862457	10.4944	1.04189	-3.33235	0	0	yes
XLOC_008790	Eif4b	chr15:101904203-101927604	135.08	97.5168	-0.470089	0.00478907	0.0243862	yes
XLOC_008795	Mfsd5	chr15:102109886-102112175	12.1452	7.3424	-0.726063	0.00204064	0.0120779	yes
XLOC_008816	Copz1	chr15:103103348-103130295	63.1605	40.1687	-0.652951	6.20471e-05	0.000622782	yes
XLOC_008831	Nipbl	chr15:8239909-8394714	21.6912	29.6044	0.448699	0.00907165	0.0410171	yes
XLOC_008832	Slc1a3	chr15:8584123-8660807	0.697244	3.33277	2.25699	3.74598e-11	1.32291e-09	yes
XLOC_008836	Dnajc21	chr15:10376517-10400271	24.2689	15.7796	-0.621043	0.000403883	0.00311511	yes
XLOC_008837	Brix1	chr15:10404533-10415692	39.4081	22.1145	-0.833499	2.76296e-07	5.12956e-06	yes
XLOC_008843	Sub1	chr15:11911093-11925762	108.475	61.3364	-0.822553	5.79854e-07	9.90981e-06	yes
XLOC_008845	6030458C11Rik	chr15:12737931-12754412	12.9341	7.35155	-0.815063	1.42538e-05	0.000171592	yes
XLOC_008846	Cdh6	chr15:12958431-13103748	31.7065	11.0919	-1.51528	4.73495e-11	1.65688e-09	yes
XLOC_008850	Basp1	chr15:25293031-25343519	25.3589	36.7347	0.534654	0.00236816	0.0137194	yes
XLOC_008858	Cct5	chr15:31520638-31531559	292.296	159.047	-0.877974	8.42953e-08	1.71831e-06	yes
XLOC_008865	Rpl30	chr15:34370260-34373031	1739.69	785.699	-1.14678	1.63525e-11	6.05421e-10	yes
XLOC_008866	Hrsp12	chr15:34413776-34425001	15.3565	9.06687	-0.760178	0.00131639	0.00841863	yes
XLOC_008871	Cox6c	chr15:35861730-35868001	177.206	93.3896	-0.924094	2.04114e-07	3.89915e-06	yes
XLOC_008879	Zfp706	chr15:36926781-36937157	35.5901	25.7293	-0.46806	0.00383673	0.0204053	yes
XLOC_008887	Slc25a32	chr15:38922795-38944262	3.9733	2.24779	-0.821831	0.00063413	0.00456483	yes
XLOC_008892	Angpt1	chr15:42256270-42508341	1.29773	4.4429	1.77551	3.40372e-12	1.41019e-10	yes
XLOC_008893	Rspo2	chr15:42852340-43002393	1.46532	12.5053	3.09325	0	0	yes
XLOC_008894	Eif3e	chr15:43081585-43114282	258.572	171.621	-0.591335	0.000321322	0.00256695	yes
XLOC_008902	Trps1	chr15:50486304-50721641	0.84377	5.99047	2.82775	0	0	yes
XLOC_008907	Ext1	chr15:52895251-53177738	20.3107	33.1692	0.707601	4.12875e-05	0.000438073	yes
XLOC_008916	Has2	chr15:56497181-56526101	1.74471	0.715814	-1.28533	1.07615e-05	0.000134019	yes
XLOC_008918	Derl1	chr15:57701056-57723973	12.7208	6.16683	-1.04459	1.44517e-07	2.84296e-06	yes
XLOC_008922	Fbxo32	chr15:58007433-58046447	1.65201	0.213466	-2.95214	0	0	yes
XLOC_008925	Tmem65	chr15:58611656-58654982	6.3337	12.1094	0.935006	1.75032e-06	2.67168e-05	yes
XLOC_008940	Fam49b	chr15:63760648-63892010	20.8958	15.6128	-0.42048	0.00961032	0.042889	yes
XLOC_008958	Peg13	chr15:72420049-72891634	2.91778	7.30937	1.32488	4.12153e-07	7.3182e-06	yes
XLOC_008988	Eef1d	chr15:75725226-75739770	145.433	66.3203	-1.13284	4.06808e-12	1.67817e-10	yes
XLOC_008995	Nrbp2	chr15:75916013-75920687	0.987057	2.89772	1.55371	0.00171022	0.0104319	yes
XLOC_009004	Bop1	chr15:76210942-76307699	18.3181	8.77581	-1.06167	6.70025e-07	1.13495e-05	yes
XLOC_009006	Scrt1	chr15:76346632-76352559	0.00360063	1.99174	9.11157	0.000162828	0.00143494	yes
XLOC_009029	Myh9	chr15:77591018-77672545	14.0558	6.43634	-1.12685	2.00637e-11	7.34302e-10	yes
XLOC_009030	Txn2	chr15:77745480-77759424	36.5977	25.2578	-0.535021	0.00447674	0.0231031	yes
XLOC_009032	Eif3d	chr15:77789427-77801254	90.4368	64.0979	-0.496634	0.00180955	0.0109402	yes
XLOC_009038	Tst	chr15:78229985-78236289	7.627	3.63236	-1.07021	0.0018243	0.011012	yes
XLOC_009045	Mfng	chr15:78586312-78603875	2.95371	17.9998	2.60739	0	0	yes
XLOC_009063	Sun2	chr15:79552395-79572966	1.1647	2.77927	1.25474	0.000798608	0.00557279	yes
XLOC_009069	Rpl3	chr15:79908210-79913836	949.898	586.108	-0.696605	0.000208213	0.0017619	yes
XLOC_009072	Rps19bp1	chr15:80091043-80094736	21.027	9.59039	-1.13258	1.48642e-05	0.000177711	yes
XLOC_009083	Phf5a	chr15:81694945-81702322	68.0259	32.4253	-1.06896	6.32363e-11	2.17308e-09	yes
XLOC_009086	Pppde2	chr15:81822952-81846570	16.5142	9.38493	-0.815289	7.29866e-06	9.43944e-05	yes
XLOC_009087	Nhp2l1	chr15:81871774-81878028	124.584	61.1456	-1.0268	1.17843e-10	3.90247e-09	yes
XLOC_009092	Ndufa6	chr15:82180568-82184721	32.4479	13.5363	-1.26128	5.26418e-06	7.01195e-05	yes
XLOC_009104	Rrp7a	chr15:82930634-82953231	21.2533	13.096	-0.698559	0.000416296	0.00319628	yes
XLOC_009105	Poldip3	chr15:82955961-82979819	33.8773	21.8359	-0.63362	0.000179527	0.00154442	yes
XLOC_009106	Cyb5r3	chr15:82983931-83002638	84.3082	50.6637	-0.734719	5.21884e-06	6.96356e-05	yes
XLOC_009113	Ttll12	chr15:83405523-83425587	23.5731	13.991	-0.752641	8.93769e-06	0.000113371	yes
XLOC_009114	Scube1	chr15:83433009-83555451	37.3961	17.4172	-1.10238	5.93498e-08	1.24837e-06	yes
XLOC_009121	Phf21b	chr15:84615343-84686559	2.27671	8.09255	1.82964	1.37579e-09	3.81101e-08	yes
XLOC_009127	Wnt7b	chr15:85365866-85424138	5.86991	14.6736	1.32182	5.66081e-10	1.67744e-08	yes
XLOC_009130	Celsr1	chr15:85709756-85864207	2.96179	4.47285	0.594723	0.00477406	0.0243227	yes
XLOC_009131	Cerk	chr15:85969530-86016571	0.549712	1.95355	1.82935	5.85063e-06	7.72856e-05	yes
XLOC_009135	Mlc1	chr15:88786313-88809492	0.0192203	2.63872	7.10107	0.00689007	0.0328054	yes
XLOC_009139	Mapk12	chr15:88961013-88971133	12.7856	8.44943	-0.597596	0.00592441	0.0289579	yes
XLOC_009141	Plxnb2	chr15:88985978-89011218	13.4127	20.4382	0.607667	0.00687502	0.0327595	yes
XLOC_009155	Abcd2	chr15:90976301-91022238	2.14743	3.75011	0.804319	0.000160437	0.0014166	yes
XLOC_009160	Prickle1	chr15:93329030-93426322	3.98411	0.547843	-2.86242	2.22045e-15	1.39349e-13	yes
XLOC_009162	Adamts20	chr15:94100593-94234781	0.490447	2.5251	2.36417	7.81405e-07	1.30286e-05	yes
XLOC_009163	Pus7l	chr15:94353070-94373938	3.48567	1.8795	-0.891085	0.00118599	0.00772144	yes
XLOC_009166	Nell2	chr15:95049880-95359137	2.43371	12.9071	2.40694	0	0	yes
XLOC_009174	Slc38a4	chr15:96825253-96886387	9.04728	1.08626	-3.05811	0	0	yes
XLOC_009181	Col2a1	chr15:97806032-97835155	9.33605	23.3533	1.32274	5.71121e-12	2.29526e-10	yes
XLOC_009200	Fkbp11	chr15:98554797-98558629	12.6086	1.60619	-2.9727	2.99664e-09	7.86812e-08	yes
XLOC_009201	Arf3	chr15:98566444-98593726	100.988	63.6926	-0.664986	8.42525e-05	0.000813252	yes
XLOC_009205	Mll2	chr15:98662099-98701636	9.48574	6.42781	-0.561434	0.000376193	0.00294387	yes
XLOC_009206	Rhebl1	chr15:98708190-98711845	5.62857	2.08972	-1.42946	0.000677309	0.00481231	yes
XLOC_009210	Tuba1a	chr15:98780277-98783932	256.899	626.247	1.28553	1.13687e-13	5.92937e-12	yes
XLOC_009218	Racgap1	chr15:99450689-99482090	20.4839	30.3318	0.566342	0.00122236	0.00791251	yes
XLOC_009220	Lima1	chr15:99608898-99705887	3.14167	8.41941	1.42219	5.25077e-09	1.32503e-07	yes
XLOC_009226	Pou6f1	chr15:100405748-100418338	0.0330896	2.2053	6.05845	9.56837e-06	0.000120255	yes
XLOC_009232	Fignl2	chr15:100880624-100884830	7.76487	1.56713	-2.30884	0	0	yes
XLOC_009261	Krt8	chr15:101827141-101834773	3.54201	0.258244	-3.77776	2.35159e-11	8.54112e-10	yes
XLOC_009265	Rarg	chr15:102065370-102087914	1.4684	0.20647	-2.83024	2.87034e-06	4.13464e-05	yes
XLOC_009271	Atp5g2	chr15:102493298-102501478	225.261	127.264	-0.823772	5.42447e-07	9.3372e-06	yes
XLOC_009320	-	chr15:37161694-37162615	1.13354	0.117118	-3.27481	0.00221304	0.0129422	yes
XLOC_009322	-	chr15:38008852-38010727	1.86686	0.50765	-1.87871	4.01814e-05	0.00042776	yes
XLOC_009357	-	chr15:59477105-59477897	1.52143	0.233305	-2.70514	0.00274812	0.0155626	yes
XLOC_009390	-	chr15:77801568-77802506	1.08312	0.234443	-2.20789	0.0107271	0.0465913	yes
XLOC_009476	4930562C15Rik	chr16:4835415-4867691	1.29995	6.78756	2.38444	5.00355e-07	8.67508e-06	yes
XLOC_009481	Ubn1	chr16:5050160-5086383	5.23443	9.5601	0.868995	7.8897e-05	0.000768925	yes
XLOC_009487	Abat	chr16:8513521-8621660	1.36997	2.52159	0.880185	0.00270507	0.0153598	yes
XLOC_009489	1810013L24Rik	chr16:8830192-8860964	18.4121	28.8819	0.649508	0.00188353	0.0112876	yes
XLOC_009491	Atf7ip2	chr16:10192998-10243630	1.87358	0.721663	-1.3764	0.00447505	0.0231006	yes
XLOC_009510	Rrn3	chr16:13780791-13814934	34.2486	25.1525	-0.445344	0.00499166	0.0252967	yes
XLOC_009513	2900011O08Rik	chr16:13986729-14101587	1.37813	5.11304	1.89147	1.55993e-08	3.65768e-07	yes
XLOC_009516	Abcc1	chr16:14361650-14474971	4.34174	2.94199	-0.561484	0.00876921	0.0400314	yes
XLOC_009522	Pkp2	chr16:16213437-16272805	5.65174	2.77709	-1.02512	0.00298024	0.0166117	yes
XLOC_009523	Yars2	chr16:16303057-16309733	20.9609	14.4517	-0.536464	0.0086446	0.0395285	yes
XLOC_009525	Ppm1f	chr16:16896561-16927468	5.40011	3.72832	-0.534462	0.00907301	0.0410171	yes
XLOC_009526	Mapk1	chr16:16983474-17047546	40.444	26.7786	-0.594843	0.00053306	0.00393586	yes
XLOC_009528	Ydjc	chr16:17147059-17149000	2.10945	0.425448	-2.30981	0.00147365	0.00925431	yes
XLOC_009538	Smpd4	chr16:17619446-17644923	15.8585	11.4939	-0.464387	0.00733986	0.0345324	yes
XLOC_009549	Arvcf	chr16:18348366-18479166	7.29969	15.2821	1.06593	6.64345e-06	8.66819e-05	yes
XLOC_009551	Gnb1l	chr16:18498860-18566772	5.38317	2.90313	-0.890846	0.000596669	0.00433593	yes
XLOC_009558	Klhl24	chr16:20097626-20129296	7.06529	10.4637	0.566566	0.000507501	0.00377392	yes
XLOC_009560	Eif2b5	chr16:20498889-20509398	27.3336	17.2042	-0.66792	9.32874e-05	0.000885282	yes
XLOC_009561	Dvl3	chr16:20517136-20534087	13.639	20.2647	0.571224	0.000654823	0.00468385	yes
XLOC_009566	Ece2	chr16:20611673-20645988	13.0132	5.46938	-1.25053	7.97495e-05	0.000775653	yes
XLOC_009568	Eif4g1	chr16:20672821-20692956	84.2827	57.6814	-0.547129	0.00131384	0.00840515	yes
XLOC_009571	Polr2h	chr16:20716934-20722444	94.9219	44.8438	-1.08183	4.2106e-08	9.11709e-07	yes
XLOC_009578	Dnajb11	chr16:22857917-22879707	43.3894	26.0417	-0.736522	1.36987e-05	0.000166058	yes
XLOC_009590	Lpp	chr16:24392641-24992664	4.87871	1.7847	-1.45082	1.66007e-11	6.13425e-10	yes
XLOC_009598	Ccdc50	chr16:27389062-27452304	28.0247	18.1792	-0.62441	8.8578e-05	0.000848087	yes
XLOC_009603	Hes1	chr16:30065442-30067882	39.3271	11.391	-1.78762	0	0	yes
XLOC_009605	Bdh1	chr16:31422382-31458987	0.786324	1.87891	1.2567	0.00215544	0.0126478	yes
XLOC_009606	Dlg1	chr16:31663528-31873442	30.7582	17.822	-0.787315	3.72241e-06	5.19843e-05	yes
XLOC_009610	1500031L02Rik	chr16:32099887-32108140	8.08166	4.9931	-0.694715	0.00428912	0.0223093	yes
XLOC_009618	Pcyt1a	chr16:32431006-32475151	6.33324	9.21844	0.54158	0.00276514	0.0156435	yes
XLOC_009620	Tfrc	chr16:32608981-32632880	40.6604	27.0438	-0.588325	0.000212963	0.00179732	yes
XLOC_009625	Rpl35a	chr16:33056538-33060274	894.961	319.684	-1.48518	0	0	yes
XLOC_009630	Zfp148	chr16:33380860-33503989	4.13084	8.79446	1.09016	4.40505e-10	1.32783e-08	yes
XLOC_009632	Heg1	chr16:33684551-33771666	6.01262	17.789	1.56492	6.66134e-16	4.53753e-14	yes
XLOC_009634	Itgb5	chr16:33829750-33952236	1.69642	0.780282	-1.12043	0.0071229	0.0337422	yes
XLOC_009636	Ccdc14	chr16:34690701-34725280	5.77774	3.92032	-0.559534	0.0106951	0.0464735	yes
XLOC_009637	Mylk	chr16:34785035-35002520	4.98237	1.62567	-1.6158	9.99277e-09	2.42423e-07	yes
XLOC_009638	Ptplb	chr16:35022506-35109261	11.6908	6.80427	-0.78086	1.42037e-05	0.000171097	yes
XLOC_009640	Sema5b	chr16:35541447-35664751	4.05693	18.2963	2.17309	0	0	yes
XLOC_009641	Hspbap1	chr16:35770471-35828548	2.60833	1.00823	-1.3713	0.000277697	0.00226187	yes
XLOC_009645	Ccdc58	chr16:36071745-36092204	47.7371	22.5907	-1.07938	6.08315e-07	1.03592e-05	yes
XLOC_009662	Gsk3b	chr16:38085149-38246168	30.6852	44.2076	0.526752	0.00170543	0.0104093	yes
XLOC_009663	Cox17	chr16:38347084-38352849	74.5645	32.0884	-1.21644	3.97978e-07	7.09283e-06	yes
XLOC_009666	Tmem39a	chr16:38558810-38592275	23.8242	14.3653	-0.729842	3.41902e-05	0.000372049	yes
XLOC_009667	B4galt4	chr16:38742376-38769158	1.63052	3.9285	1.26864	0.000119954	0.00110546	yes
XLOC_009668	Igsf11	chr16:38902457-39027270	4.17863	6.14824	0.557143	0.0117039	0.0498608	yes
XLOC_009669	Lsamp	chr16:41533454-42146326	1.07802	2.73736	1.3444	0.00010837	0.00101285	yes
XLOC_009672	Zbtb20	chr16:43247396-43632858	0.496089	2.15702	2.12037	0.000319546	0.0025549	yes
XLOC_009673	Mir568	chr16:43639442-43642879	0.313633	1.49523	2.25322	3.97186e-06	5.49301e-05	yes
XLOC_009676	Naa50	chr16:44139921-44163477	47.443	33.4334	-0.504907	0.00162378	0.0100099	yes
XLOC_009680	-	chr16:44663376-44665501	0	15.2741	1.79769e+308	6.43537e-11	2.20751e-09	yes
XLOC_009681	BC027231	chr16:44724412-44746476	17.1163	12.0545	-0.505799	0.00635904	0.0306441	yes
XLOC_009699	Ift57	chr16:49699374-49765239	11.8623	5.39664	-1.13625	5.88354e-08	1.24027e-06	yes
XLOC_009700	Cd47	chr16:49855486-49915335	14.9656	5.72998	-1.38505	2.90243e-10	9.04812e-09	yes
XLOC_009705	Rpl24	chr16:55966387-55971550	831.189	466.16	-0.834351	2.68657e-07	5.00229e-06	yes
XLOC_009707	Senp7	chr16:56075521-56190125	5.71935	11.2687	0.978396	8.43975e-05	0.00081383	yes
XLOC_009710	Tomm70a	chr16:57121792-57167445	56.3006	32.8183	-0.778651	1.53434e-05	0.000182983	yes
XLOC_009711	Filip1l	chr16:57302112-57606980	0.562241	2.17913	1.95449	0.000515357	0.00382047	yes
XLOC_009712	Dcbld2	chr16:58408647-58470133	13.159	9.34699	-0.493478	0.00220789	0.0129239	yes
XLOC_009719	Mina	chr16:59471600-59555578	7.20824	3.93011	-0.875077	0.0063428	0.0306044	yes
XLOC_009723	Cggbp1	chr16:64851910-64859317	25.1871	33.9721	0.431667	0.00640164	0.0308106	yes
XLOC_009732	Robo1	chr16:72663376-73046573	18.5322	5.60541	-1.72514	0	0	yes
XLOC_009733	Rbm11	chr16:75593135-75603285	1.7469	0.555105	-1.65396	0.000101264	0.000951543	yes
XLOC_009736	2810055G20Rik	chr16:77329521-77673611	0.0325377	6.95038	7.73884	2.83102e-07	5.24574e-06	yes
XLOC_009747	Jam2	chr16:84774367-84826620	1.7751	14.2129	3.00123	0	0	yes
XLOC_009763	Sod1	chr16:90220986-90284678	499.482	315.368	-0.663398	0.00136996	0.008706	yes
XLOC_009769	Olig2	chr16:91225794-91228922	0.235762	6.36665	4.75513	2.83564e-09	7.48648e-08	yes
XLOC_009775	Ifngr2	chr16:91547338-91564252	1.68771	4.01741	1.25119	0.000339408	0.00268677	yes
XLOC_009788	Morc3	chr16:93832365-93876318	9.3527	5.92761	-0.657934	0.000225894	0.00188979	yes
XLOC_009795	Ets2	chr16:95924013-95942656	4.51732	2.07709	-1.1209	3.72345e-06	5.19843e-05	yes
XLOC_009796	Wrb	chr16:96367025-96379459	30.6299	18.654	-0.715452	1.88823e-05	0.000220382	yes
XLOC_009809	Trap1	chr16:4032948-4077810	22.3477	15.4679	-0.530847	0.00598063	0.0291954	yes
XLOC_009813	Srl	chr16:4480144-4541824	11.3852	5.21534	-1.12632	2.49079e-07	4.67413e-06	yes
XLOC_009818	Fam100a	chr16:4874188-4880250	4.52074	1.74186	-1.37593	0.00194126	0.0115576	yes
XLOC_009844	Zc3h7a	chr16:11136686-11176486	3.65249	6.3594	0.80001	0.00066607	0.00473871	yes
XLOC_009845	Rsl1d1	chr16:11193129-11203385	212.03	121.822	-0.799496	9.90033e-07	1.60188e-05	yes
XLOC_009850	Parn	chr16:13538056-13668263	12.1039	7.98731	-0.599695	0.00135577	0.00863013	yes
XLOC_009862	Fgd4	chr16:16416872-16560334	2.76114	6.8583	1.31259	2.34365e-07	4.41533e-06	yes
XLOC_009872	Sdf2l1	chr16:17130230-17132476	24.6515	10.779	-1.19346	2.45743e-07	4.6206e-06	yes
XLOC_009884	Slc25a1	chr16:17925303-17928312	14.3913	7.78677	-0.886101	0.000508137	0.00377489	yes
XLOC_009885	Prodh	chr16:18071818-18089283	4.48157	1.85019	-1.27633	0.000862287	0.00595205	yes
XLOC_009888	Ranbp1	chr16:18239913-18248787	410.501	181.076	-1.18079	1.11782e-10	3.71463e-09	yes
XLOC_009894	Gp1bb,Sept5	chr16:18620411-18630031	0.993064	3.99489	2.0082	0.0102195	0.0448549	yes
XLOC_009909	Parl	chr16:20279893-20302435	51.7111	29.5622	-0.806721	0.00012572	0.00114809	yes
XLOC_009921	Tmem41a	chr16:21934399-21947625	25.6365	8.18688	-1.64681	5.55733e-12	2.23943e-10	yes
XLOC_009923	Igf2bp2	chr16:22059079-22163372	79.3036	53.5946	-0.565299	0.000925932	0.00630907	yes
XLOC_009925	Etv5	chr16:22381385-22439643	17.4418	6.20703	-1.49057	0	0	yes
XLOC_009931	Masp1	chr16:23451857-23520679	0.118988	1.18895	3.32079	2.33003e-05	0.00026547	yes
XLOC_009936	Leprel1	chr16:25955971-26105927	8.26349	2.43531	-1.76265	7.00423e-09	1.73888e-07	yes
XLOC_009943	1600021P15Rik	chr16:28826261-28929784	6.85419	3.52537	-0.959211	1.47569e-05	0.000176649	yes
XLOC_009951	Atp13a3	chr16:30312506-30388616	21.1557	12.6202	-0.745314	3.77287e-06	5.25976e-05	yes
XLOC_009961	Pigx	chr16:32084499-32099818	26.1416	11.4516	-1.19081	6.55343e-06	8.55656e-05	yes
XLOC_009972	Umps	chr16:33955007-33967089	33.6268	24.9972	-0.427845	0.0113126	0.0486377	yes
XLOC_009973	Kalrn	chr16:33969156-34573321	1.93384	4.26904	1.14244	1.1785e-05	0.000145533	yes
XLOC_009982	Fam162a	chr16:36043929-36071601	110.982	43.8476	-1.33975	1.53211e-13	7.79949e-12	yes
XLOC_009990	Slc15a2	chr16:36750227-36785048	1.31918	0.0312129	-5.40135	6.22777e-08	1.30422e-06	yes
XLOC_010014	Qtrtd1	chr16:43861502-43889806	11.1671	5.99935	-0.89637	1.45252e-05	0.000174421	yes
XLOC_010019	Boc	chr16:44485157-44558983	2.1057	9.4886	2.17189	5.95968e-13	2.7823e-11	yes
XLOC_010023	Cd200	chr16:45382243-45409166	0.550202	1.63232	1.56889	0.00900558	0.040799	yes
XLOC_010027	Tagln3	chr16:45710963-45724644	1.73791	17.8392	3.35962	5.71987e-12	2.29526e-10	yes
XLOC_010029	Phldb2	chr16:45746343-45844491	6.64478	10.837	0.705675	9.21745e-05	0.000877768	yes
XLOC_010030	Plcxd2	chr16:45958592-46010526	1.2052	3.0099	1.32044	1.92184e-07	3.68596e-06	yes
XLOC_010035	Dzip3	chr16:48924055-48994225	14.3271	21.6424	0.595109	0.00151958	0.00948983	yes
XLOC_010037	Bbx	chr16:50191817-50432502	16.5248	11.1862	-0.562921	0.000540828	0.00398307	yes
XLOC_010040	Alcam	chr16:52249108-52453110	1.27259	2.92564	1.20098	2.10577e-06	3.13914e-05	yes
XLOC_010047	Pcnp	chr16:56015620-56029830	82.4284	61.4141	-0.424572	0.00908303	0.0410527	yes
XLOC_010048	Rg9mtd1	chr16:56033832-56037887	25.7209	18.0747	-0.508968	0.00287419	0.0161334	yes
XLOC_010056	2610528E23Rik	chr16:57302112-57606980	20.3005	9.47609	-1.09915	6.26708e-06	8.21069e-05	yes
XLOC_010058	St3gal6	chr16:58470654-58523425	2.38149	0.741267	-1.6838	6.68366e-05	0.000663501	yes
XLOC_010092	Epha3	chr16:63543474-63864005	0.0832388	21.7208	8.0276	4.26326e-13	2.04007e-11	yes
XLOC_010101	Robo2	chr16:73892550-74411157	0.781614	3.00338	1.94206	1.20348e-13	6.18722e-12	yes
XLOC_010106	Nrip1	chr16:76287646-76373294	11.8072	6.36427	-0.891597	1.6052e-05	0.000190839	yes
XLOC_010110	D16Ertd472e	chr16:78540580-78576933	7.17431	3.32632	-1.10892	4.74823e-09	1.20859e-07	yes
XLOC_010114	App	chr16:84954680-85173952	16.3656	24.0898	0.557753	0.00250747	0.0143957	yes
XLOC_010120	Cct8	chr16:87455229-87496114	129.359	86.5279	-0.580141	0.00145794	0.00917975	yes
XLOC_010150	Urb1	chr16:90751771-90810658	5.03507	3.1982	-0.654755	0.00119838	0.00779413	yes
XLOC_010151	1110004E09Rik	chr16:90926055-90935094	38.8223	27.7282	-0.485532	0.0092235	0.0415698	yes
XLOC_010155	Tmem50b	chr16:91574751-91597929	6.30627	11.6797	0.889143	9.31163e-05	0.000884536	yes
XLOC_010157	Gart	chr16:91621641-91647217	47.1126	25.3601	-0.893551	2.70747e-06	3.92306e-05	yes
XLOC_010164	Rcan1	chr16:92392197-92466391	12.9664	8.5241	-0.60516	0.00722171	0.034131	yes
XLOC_010176	Psmg1	chr16:96201541-96212510	62.122	23.0907	-1.42779	2.30926e-14	1.30005e-12	yes
XLOC_010178	Hmgn1	chr16:96343194-96349351	644.987	352.406	-0.872032	8.84723e-07	1.4536e-05	yes
XLOC_010185	Ripk4	chr16:97963548-97985362	4.3778	0.365299	-3.58306	0	0	yes
XLOC_010324	-	chr16:42176438-42181084	0.928054	2.09158	1.17231	0.000212637	0.00179536	yes
XLOC_010339	-	chr16:43632911-43639388	0.286569	1.68246	2.55362	7.71669e-10	2.23457e-08	yes
XLOC_010405	-	chr16:77329521-77673611	0	1.03781	1.79769e+308	0.00863896	0.0395157	yes
XLOC_010408	-	chr16:77329521-77673611	0	1.0801	1.79769e+308	0.00884485	0.040271	yes
XLOC_010475	-	chr16:96304431-96306778	0.785849	1.73028	1.13868	0.0106296	0.0462515	yes
XLOC_010493	Tulp4	chr17:6106402-6240881	6.77191	10.2923	0.603936	0.00033143	0.00263383	yes
XLOC_010495	Dynlt1b	chr17:6429259-6435443	47.3831	76.4627	0.690385	0.000225571	0.00188792	yes
XLOC_010497	Tmem181c-ps	chr17:6635807-6646630	2.36259	4.60018	0.961317	5.43757e-05	0.000557773	yes
XLOC_010498	Dynlt1f	chr17:6806387-6812617	39.6042	57.5986	0.540379	0.0106172	0.0462212	yes
XLOC_010506	Fgfr1op	chr17:8358382-8389335	29.2917	17.0216	-0.78313	4.36418e-06	5.96216e-05	yes
XLOC_010508	Brp44l	chr17:8476677-8490526	2.68283	5.9668	1.1532	0.00399888	0.0210745	yes
XLOC_010524	Tcp1	chr17:13109260-13133262	166.679	119.191	-0.483797	0.00956302	0.0427577	yes
XLOC_010526	Sod2	chr17:13200704-13210985	14.2874	9.73008	-0.554218	0.00103847	0.00692456	yes
XLOC_010536	9030025P20Rik	chr17:15115827-15128541	5.1131	2.96661	-0.785385	0.00254848	0.0145962	yes
XLOC_010539	Fam120b	chr17:15533165-15570545	4.61994	7.23951	0.648019	0.00196338	0.0116748	yes
XLOC_010542	Chd1	chr17:15841930-15909576	39.5569	27.6004	-0.519239	0.00182233	0.0110105	yes
XLOC_010543	Zfp960	chr17:17201066-17226595	3.998	2.14459	-0.898574	0.00625214	0.0302202	yes
XLOC_010544	Zfp97	chr17:17258346-17283842	3.45392	1.88292	-0.875265	0.000432898	0.00329992	yes
XLOC_010546	Riok2	chr17:17511295-17531863	19.3347	13.8751	-0.47869	0.00533295	0.0266522	yes
XLOC_010547	Lix1	chr17:17539649-17596351	15.1912	25.9077	0.770148	3.35309e-06	4.74365e-05	yes
XLOC_010550	Ncrna00085	chr17:17967315-17992152	0.611887	8.4023	3.77945	2.72623e-05	0.000304983	yes
XLOC_010597	Zscan10	chr17:23737822-23747986	4.28889	0.260405	-4.04177	1.61504e-10	5.22188e-09	yes
XLOC_010600	Cldn6	chr17:23816331-23819414	8.39898	0.411054	-4.35281	0	0	yes
XLOC_010611	Abca3	chr17:24488990-24551458	0.827214	1.93718	1.22763	0.000943252	0.00639575	yes
XLOC_010612	Rnps1	chr17:24551619-24562842	116.714	87	-0.423885	0.00826455	0.0381082	yes
XLOC_010613	Eci1	chr17:24563627-24576261	1.59178	7.73749	2.28122	2.61935e-06	3.82142e-05	yes
XLOC_010617	2610019E17Rik	chr17:24665195-24670692	14.1876	1.10778	-3.67889	0.000194703	0.00166227	yes
XLOC_010619	Nthl1	chr17:24769626-24775783	5.97896	2.43404	-1.29654	0.00185877	0.0111707	yes
XLOC_010622	Rps2	chr17:24857007-24858872	1524.9	635.798	-1.26208	5.91904e-12	2.36784e-10	yes
XLOC_010632	Nme3	chr17:25033444-25073936	27.9277	11.6293	-1.26393	0.000331483	0.00263383	yes
XLOC_010637	BC003965	chr17:25321505-25324607	10.0051	6.0375	-0.728706	0.000143326	0.00128196	yes
XLOC_010660	Mrpl28	chr17:26260447-26263558	25.2972	15.2141	-0.733563	0.00109856	0.00726593	yes
XLOC_010665	Ergic1	chr17:26698456-26793878	29.5319	19.7025	-0.583898	0.000396617	0.00307478	yes
XLOC_010666	Atp6v0e	chr17:26813340-26836591	18.487	7.93838	-1.21959	6.65913e-06	8.67682e-05	yes
XLOC_010677	Snrpc	chr17:27977031-27988912	35.5036	21.5323	-0.721461	0.00170462	0.0104077	yes
XLOC_010680	Scube3	chr17:28279441-28313979	3.00254	11.5435	1.94282	0	0	yes
XLOC_010686	Rpl10a	chr17:28465415-28467978	1962.03	1242.73	-0.658832	0.000599379	0.00435397	yes
XLOC_010690	Mapk14	chr17:28828286-28885352	22.8202	16.1575	-0.498112	0.00588634	0.028816	yes
XLOC_010697	Cdkn1a	chr17:29227930-29237667	0.385244	4.45333	3.53104	7.24223e-08	1.49058e-06	yes
XLOC_010713	Pde9a	chr17:31523178-31613254	0.103067	2.57795	4.64457	0.00461166	0.0236527	yes
XLOC_010715	Pknox1	chr17:31701717-31744638	2.79421	4.59372	0.717224	0.00445702	0.0230323	yes
XLOC_010717	Rrp1b	chr17:32173106-32200626	23.4083	11.1011	-1.07632	5.65197e-10	1.67744e-08	yes
XLOC_010724	Cyp4f15	chr17:32822584-32840440	1.16458	0.371155	-1.64971	0.0100654	0.044392	yes
XLOC_010738	Ndufa7	chr17:33961538-33975258	69.3123	36.9713	-0.906706	0.000347089	0.00273964	yes
XLOC_010739	Cd320	chr17:33980035-33986719	12.6699	5.48911	-1.20676	5.04557e-08	1.08028e-06	yes
XLOC_010744	Wdr46	chr17:34077667-34086640	31.229	21.6767	-0.526736	0.0029729	0.0165854	yes
XLOC_010765	Ager,Pbx2	chr17:34729303-34737967	28.0004	19.6874	-0.508177	0.00382691	0.0203701	yes
XLOC_010766	Agpat1	chr17:34741867-34752916	25.3322	18.1293	-0.482648	0.00985115	0.0436686	yes
XLOC_010778	Lsm2	chr17:35118798-35122838	88.1036	49.1809	-0.841102	1.00138e-05	0.000125278	yes
XLOC_010779	Vars	chr17:35137851-35153274	19.8623	14.0257	-0.501958	0.00372115	0.0199124	yes
XLOC_010781	Clic1	chr17:35186565-35195672	28.8357	16.2003	-0.831837	0.000271845	0.00222177	yes
XLOC_010782	Ddah2	chr17:35195979-35199044	41.1889	63.7768	0.630776	0.000662391	0.00472054	yes
XLOC_010810	Flot1	chr17:35960301-35969732	2.69481	6.0547	1.16787	0.00065629	0.00468935	yes
XLOC_010832	Zfp57	chr17:37138107-37147674	3.62418	10.5305	1.53884	3.52585e-07	6.37283e-06	yes
XLOC_010833	Gabbr1	chr17:37182910-37212003	2.49184	4.65214	0.900681	0.00730239	0.0344104	yes
XLOC_010874	Mut	chr17:41071633-41098938	8.93311	5.70488	-0.646967	0.00040058	0.0031005	yes
XLOC_010879	Pla2g7	chr17:43705399-43749226	2.76466	0.811785	-1.76793	1.19987e-05	0.000147842	yes
XLOC_010881	Rcan2	chr17:43938799-44176465	0.941665	2.18804	1.21635	0.000731242	0.00515722	yes
XLOC_010884	Supt3h	chr17:44740949-45256233	5.95686	3.5564	-0.744133	0.0101395	0.0446335	yes
XLOC_010892	Xpo5	chr17:46339723-46380583	41.6996	28.9843	-0.524759	0.00219314	0.0128415	yes
XLOC_010899	BC048355	chr17:46633737-46636567	19.456	11.9771	-0.699933	0.00230286	0.0134101	yes
XLOC_010905	Tbcc	chr17:47027569-47029412	3.7024	1.90753	-0.956751	0.00548803	0.027299	yes
XLOC_010913	Usp49	chr17:47766957-47828041	5.34371	9.94598	0.896272	4.31114e-06	5.89425e-05	yes
XLOC_010926	AI314976	chr17:48549404-48556591	36.5128	23.2413	-0.65171	0.000485109	0.00363708	yes
XLOC_010934	Rab5a	chr17:53618558-53678776	15.1702	8.20517	-0.886634	1.1186e-05	0.000138853	yes
XLOC_010935	Kat2b	chr17:53706295-53812046	0.44607	2.3074	2.37092	2.55627e-09	6.80523e-08	yes
XLOC_010937	St6gal2	chr17:55584764-55654045	2.19453	4.80883	1.13177	1.04348e-05	0.000130119	yes
XLOC_010942	Shd	chr17:56109904-56116042	1.27007	6.627	2.38345	0.000101497	0.000953234	yes
XLOC_010953	Rpl36	chr17:56752817-56753669	967.559	464.252	-1.05944	3.18399e-11	1.13703e-09	yes
XLOC_010956	Ndufa11	chr17:56857184-56863671	7.78611	4.76526	-0.708348	0.00253503	0.0145443	yes
XLOC_010965	Trip10	chr17:57388873-57403120	6.423	3.1947	-1.00757	0.000818024	0.00569167	yes
XLOC_010970	Man2a1	chr17:64950988-65104450	8.20559	2.67247	-1.61844	0	0	yes
XLOC_010977	Epb4.1l3	chr17:69506149-69639327	3.5385	13.1697	1.89601	2.44249e-15	1.52286e-13	yes
XLOC_010983	Lpin2	chr17:71533000-71599577	6.07159	14.2047	1.22622	9.21663e-12	3.50862e-10	yes
XLOC_010985	Wdr43	chr17:71965530-72008371	81.4252	47.3175	-0.7831	7.82609e-05	0.000763503	yes
XLOC_010990	Ypel5	chr17:73186043-73200535	1.4826	2.65366	0.839854	0.00409417	0.0215175	yes
XLOC_010991	Lbh	chr17:73267644-73291286	1.16821	7.92478	2.76207	0	0	yes
XLOC_010994	Spast	chr17:74738326-74790453	23.0784	34.6794	0.587535	0.000239622	0.00199331	yes
XLOC_010996	Yipf4	chr17:74888832-74901463	2.04821	1.02243	-1.00235	0.00696466	0.033096	yes
XLOC_010998	Ttc27	chr17:75117089-75262912	16.3872	8.84527	-0.88959	1.13382e-06	1.81261e-05	yes
XLOC_010999	Ltbp1	chr17:75404868-75792307	7.18873	2.27572	-1.65941	0	0	yes
XLOC_011003	Vit	chr17:78907402-79026749	0.334735	1.52198	2.18486	0.000249665	0.00206429	yes
XLOC_011011	Gemin6	chr17:80623788-80627885	29.441	18.2869	-0.687016	0.000714663	0.00504776	yes
XLOC_011015	Tmem178	chr17:81343971-81401156	0.104781	2.27983	4.44348	5.13651e-05	0.000532312	yes
XLOC_011016	Pkdcc	chr17:83614622-83624409	5.46298	1.40148	-1.96274	5.25898e-08	1.12346e-06	yes
XLOC_011017	Eml4	chr17:83750270-83879701	51.1002	24.6143	-1.05383	0.000286061	0.00232308	yes
XLOC_011020	Plekhh2	chr17:84911234-85021482	2.71632	1.83723	-0.564121	0.00942156	0.0422634	yes
XLOC_011026	Six3	chr17:86000459-86025531	46.1968	8.15701	-2.50168	0	0	yes
XLOC_011032	Socs5	chr17:87507018-87537059	1.90451	2.97884	0.645335	0.0105825	0.0461375	yes
XLOC_011033	Ttc7	chr17:87682225-87781113	1.00182	0.394536	-1.34439	0.00410667	0.0215594	yes
XLOC_011038	Foxn2	chr17:88840051-88889893	6.64726	4.26434	-0.640438	0.00184897	0.0111293	yes
XLOC_011053	5730437N04Rik	chr17:5410253-5440260	18.4409	10.3971	-0.826733	0.00237112	0.0137324	yes
XLOC_011055	Serac1	chr17:5941279-6079739	2.94239	4.45103	0.597152	0.00957725	0.0427913	yes
XLOC_011056	Dynlt1a	chr17:6310544-6317474	40.9101	66.2518	0.695502	0.000352737	0.0027785	yes
XLOC_011057	Tmem181b-ps	chr17:6438149-6450142	4.98255	8.11454	0.703624	0.000209648	0.00177169	yes
XLOC_011059	Tmem181c-ps	chr17:6814820-6825643	2.36602	4.60414	0.960467	5.58967e-05	0.000570518	yes
XLOC_011060	Dynlt1e,Dynlt1f	chr17:6851323-6860656	38.8908	57.4003	0.561631	0.011643	0.0496787	yes
XLOC_011061	Ezr	chr17:6942479-6987129	10.8771	31.5522	1.53644	0	0	yes
XLOC_011080	Igf2r	chr17:12875271-13061009	9.08813	13.0096	0.517522	0.00123255	0.00796497	yes
XLOC_011085	Acat2	chr17:13135907-13153591	34.0904	71.2367	1.06326	8.58915e-11	2.91498e-09	yes
XLOC_011096	Phf10	chr17:15080188-15098237	41.1691	28.1327	-0.549312	0.0106092	0.046205	yes
XLOC_011102	Dll1	chr17:15504317-15512787	6.65112	15.0251	1.17571	3.40297e-09	8.85005e-08	yes
XLOC_011103	Psmb1	chr17:15612684-15635240	75.3568	43.3766	-0.796822	2.49134e-06	3.64857e-05	yes
XLOC_011104	Pdcd2	chr17:15636804-15664265	21.261	10.9968	-0.951126	0.00420913	0.0220008	yes
XLOC_011127	Gm4944	chr17:22333837-22449211	3.45655	2.25435	-0.61662	0.00332309	0.0181732	yes
XLOC_011142	Paqr4	chr17:23863302-23877304	1.19464	3.94391	1.72305	0.000165221	0.00145068	yes
XLOC_011155	Atp6v0c	chr17:24300831-24306374	76.1334	36.8111	-1.04839	2.03182e-08	4.65203e-07	yes
XLOC_011170	Gfer	chr17:24830131-24833101	9.36917	5.83372	-0.683505	0.00863974	0.0395157	yes
XLOC_011172	Rnf151	chr17:24852065-24856226	1.2073	0.0695135	-4.11835	0.00192218	0.011469	yes
XLOC_011177	Nubp2	chr17:25019554-25023295	16.5055	10.2576	-0.686255	0.00668612	0.0319548	yes
XLOC_011179	Mapk8ip3	chr17:25033444-25073936	3.18035	5.41456	0.76766	0.00147163	0.00924466	yes
XLOC_011180	Hn1l	chr17:25079414-25097568	100.323	70.5213	-0.508519	0.00139951	0.00886729	yes
XLOC_011184	Gnptg	chr17:25325344-25377061	7.1211	12.8042	0.846449	0.00634941	0.030618	yes
XLOC_011186	Ube2i	chr17:25397455-25412473	114.352	82.6208	-0.468902	0.00669984	0.0320124	yes
XLOC_011188	Cacna1h	chr17:25507497-25570728	0.13926	1.29095	3.21258	0.000140727	0.001266	yes
XLOC_011190	Sox8	chr17:25702837-25707631	0.267587	1.10123	2.04103	0.00118455	0.00771659	yes
XLOC_011199	Wfikkn1	chr17:26014572-26017803	2.37905	0.168206	-3.82209	5.6613e-10	1.67744e-08	yes
XLOC_011201	Gm10012	chr17:26018455-26056659	25.1418	11.7248	-1.10053	0.00211268	0.012435	yes
XLOC_011209	Arhgdig	chr17:26336127-26338295	1.9787	0.413201	-2.25964	0.00169884	0.010389	yes
XLOC_011220	2900010M23Rik	chr17:27259609-27270836	30.1343	13.7052	-1.13669	0.000156961	0.00138899	yes
XLOC_011226	Rps10	chr17:27767373-27772187	1092.42	636.318	-0.779703	1.23508e-06	1.96188e-05	yes
XLOC_011228	D17Wsu92e	chr17:27888179-27957487	10.9415	7.01196	-0.641927	0.00121046	0.00785139	yes
XLOC_011235	Srpk1	chr17:28724469-28759430	72.8057	44.8861	-0.697782	2.30836e-05	0.00026363	yes
XLOC_011246	Mdga1	chr17:29964902-30024827	0.262157	1.45879	2.47627	1.09105e-05	0.000135697	yes
XLOC_011249	Glo1	chr17:30729806-30749604	115.62	69.5148	-0.733993	0.000113102	0.00105245	yes
XLOC_011257	Cbs	chr17:31749588-31774086	1.40324	0.495254	-1.50252	0.009724	0.043205	yes
XLOC_011258	U2af1	chr17:31784026-31795699	81.3264	41.9207	-0.956063	4.80521e-06	6.46357e-05	yes
XLOC_011259	Sik1	chr17:31981122-31992737	4.94988	3.09001	-0.679782	0.0041376	0.021698	yes
XLOC_011262	Notch3	chr17:32257837-32303797	4.85848	8.64104	0.830699	1.30626e-05	0.000159154	yes
XLOC_011271	Zfp811	chr17:32931667-32947211	2.71395	5.16725	0.929003	0.00221296	0.0129422	yes
XLOC_011273	Zfp799	chr17:32950944-32967193	11.4031	7.83664	-0.541114	0.00519053	0.0261177	yes
XLOC_011282	Zfp955a	chr17:33376451-33441730	6.82989	4.46988	-0.611629	0.00883369	0.0402585	yes
XLOC_011289	Rps28	chr17:33959981-33961443	1569.64	434.843	-1.85186	0	0	yes
XLOC_011292	H2-Ke2	chr17:34075853-34077288	62.196	40.6305	-0.61426	0.00921588	0.041555	yes
XLOC_011294	Rps18	chr17:34088943-34092586	874.173	363.393	-1.26639	1.55431e-15	9.98359e-14	yes
XLOC_011296	H2-K1	chr17:34132956-34137278	32.2887	21.8332	-0.564503	0.00560067	0.0277296	yes
XLOC_011329	Csnk2b	chr17:35253139-35258392	63.6474	42.8147	-0.571997	0.00106824	0.00708985	yes
XLOC_011337	Tcf19	chr17:35649679-35653769	3.795	7.65898	1.01305	0.00155872	0.00968054	yes
XLOC_011342	Ddr1	chr17:35818511-35841084	4.55701	9.94756	1.12625	1.19969e-05	0.000147842	yes
XLOC_011345	Atat1	chr17:36034540-36047144	12.7149	28.5442	1.16668	1.86127e-05	0.000217766	yes
XLOC_011346	Mrps18b	chr17:36047329-36053314	22.5018	7.5787	-1.57002	9.98954e-11	3.34868e-09	yes
XLOC_011347	Abcf1	chr17:36093763-36106695	34.2264	20.9358	-0.709137	1.49825e-05	0.000178957	yes
XLOC_011355	H2-T10	chr17:36131444-36258389	1.67827	3.67108	1.12923	0.00447121	0.023087	yes
XLOC_011370	Znrd1	chr17:37091302-37095462	50.0078	33.3937	-0.582579	0.00635539	0.0306342	yes
XLOC_011410	Cd2ap	chr17:42929899-43013537	49.2585	13.4454	-1.87326	0	0	yes
XLOC_011416	Slc25a27	chr17:43775915-43803966	1.65862	4.57511	1.46382	9.00089e-06	0.000114044	yes
XLOC_011417	Enpp4	chr17:44233249-44242757	0.271838	2.55578	3.23295	4.15088e-11	1.45783e-09	yes
XLOC_011421	Tmem151b	chr17:45660382-45686626	1.14053	2.78611	1.28855	5.38756e-05	0.000553533	yes
XLOC_011426	Tmem63b	chr17:45797125-45823167	6.53757	9.66835	0.564514	0.00719858	0.0340385	yes
XLOC_011432	Polr1c	chr17:46380868-46384994	55.9361	32.8399	-0.768329	1.14569e-05	0.000142032	yes
XLOC_011438	Srf	chr17:46683659-46693111	5.36345	2.79132	-0.942214	0.000124143	0.0011364	yes
XLOC_011439	Ptk7	chr17:46701399-46766453	8.37711	5.26377	-0.670356	0.0033867	0.0184476	yes
XLOC_011440	Klc4	chr17:46767579-46782096	1.59046	3.53174	1.15093	0.00988105	0.043791	yes
XLOC_011441	Klhdc3,Rrp36	chr17:46802280-46817879	25.5848	14.62	-0.807347	0.00130257	0.0083554	yes
XLOC_011446	Rpl7l1	chr17:46910855-46919605	26.2434	12.3937	-1.08235	3.99033e-10	1.21562e-08	yes
XLOC_011448	Ubr2	chr17:47065239-47147481	5.03027	7.72253	0.618437	0.00464244	0.0237787	yes
XLOC_011452	Bysl	chr17:47641999-47748441	13.9183	8.31178	-0.743757	0.00079499	0.00555159	yes
XLOC_011468	Tbc1d5	chr17:50872451-51318674	12.3179	8.15682	-0.594679	0.00799295	0.0371342	yes
XLOC_011489	D17Wsu104e	chr17:56313626-56323574	17.9663	7.36688	-1.28617	7.35169e-05	0.000721635	yes
XLOC_011492	Plin3	chr17:56418384-56429952	6.5431	3.40697	-0.941486	0.000864765	0.00596485	yes
XLOC_011494	Ptprs	chr17:56551847-56615903	17.4809	24.4657	0.484982	0.00437662	0.0226688	yes
XLOC_011497	2410015M20Rik	chr17:56746874-56749287	17.5222	8.86272	-0.983366	0.0010068	0.0067523	yes
XLOC_011501	Rfx2	chr17:56915319-56970431	0.943699	3.82855	2.0204	2.87077e-06	4.13464e-05	yes
XLOC_011509	Slc25a23	chr17:57183133-57199286	7.36244	17.5118	1.25007	8.6963e-10	2.49185e-08	yes
XLOC_011520	Efna5	chr17:62952305-63230666	25.5745	10.1807	-1.32886	4.44089e-16	3.1023e-14	yes
XLOC_011521	Fbxl17	chr17:63395300-63849929	1.24074	1.93526	0.641329	0.000714667	0.00504776	yes
XLOC_011522	Pja2	chr17:64630354-64681223	12.1753	16.8703	0.470527	0.0052494	0.0263406	yes
XLOC_011525	Vapa	chr17:65929392-65962895	57.7876	36.83	-0.649877	6.16327e-05	0.000620081	yes
XLOC_011531	Ndufv2	chr17:66428134-66450865	23.6368	14.9138	-0.66439	0.00052932	0.00391488	yes
XLOC_011532	1110012J17Rik	chr17:66686321-66799090	9.63844	5.30306	-0.861975	2.2209e-05	0.000254789	yes
XLOC_011533	Rab12	chr17:66843844-66869010	8.3149	12.8413	0.627019	0.00520855	0.0261958	yes
XLOC_011537	Arhgap28	chr17:68191190-68353448	5.95817	2.64099	-1.17379	1.00748e-08	2.44102e-07	yes
XLOC_011539	Tgif1	chr17:71193544-71202872	33.2042	18.7101	-0.827546	1.82312e-05	0.000214088	yes
XLOC_011540	Myl12b	chr17:71323302-71339856	108.99	78.8262	-0.467447	0.00469946	0.0240322	yes
XLOC_011541	Myl12a	chr17:71343132-71351873	41.8361	27.2824	-0.616777	0.000764653	0.00537306	yes
XLOC_011542	Emilin2	chr17:71601515-71660305	3.79908	1.32606	-1.51851	3.02888e-08	6.74921e-07	yes
XLOC_011554	Dpy30	chr17:74698813-74723284	114.767	80.3744	-0.513904	0.00274023	0.0155272	yes
XLOC_011556	Fam98a	chr17:75932871-75951286	25.3597	17.8253	-0.508613	0.00379704	0.0202336	yes
XLOC_011562	Cebpz	chr17:79315838-79336410	38.4968	27.1985	-0.501215	0.00296495	0.0165603	yes
XLOC_011563	Prkd3	chr17:79348744-79420156	14.2527	23.4627	0.719135	1.19267e-05	0.000147188	yes
XLOC_011579	Cox7a2l	chr17:83901256-83913922	64.5988	43.6831	-0.564432	0.00193176	0.0115087	yes
XLOC_011583	Thada	chr17:84588349-84865566	16.6026	9.8268	-0.75662	0.0072784	0.0343142	yes
XLOC_011585	Lrpprc	chr17:85104586-85190126	28.9911	21.0119	-0.464403	0.00332069	0.0181655	yes
XLOC_011588	Six3os1	chr17:86000459-86025531	25.3799	11.361	-1.1596	0.000363243	0.00285655	yes
XLOC_011595	Mcfd2	chr17:87653782-87665287	14.6118	9.49415	-0.622023	0.00212195	0.0124743	yes
XLOC_011600	Fbxo11	chr17:88374389-88464636	21.9178	37.2206	0.763998	0.0029644	0.0165603	yes
XLOC_011603	Nrxn1	chr17:90432983-91492142	0.26413	1.02207	1.95218	2.15803e-05	0.000248836	yes
XLOC_011606	-	chr17:3043849-3043998	325.302	90.3299	-1.8485	0.000180228	0.00154848	yes
XLOC_011678	-	chr17:18000142-18001001	0	1.14595	1.79769e+308	2.41706e-05	0.000274244	yes
XLOC_011757	-	chr17:36368203-36368548	137.287	23.5869	-2.54114	0	0	yes
XLOC_011758	-	chr17:36410020-36413786	2.28671	1.3339	-0.777628	0.00592285	0.0289577	yes
XLOC_011759	-	chr17:36414654-36418257	1.20785	0.570252	-1.08277	0.00344617	0.0186864	yes
XLOC_011801	-	chr17:63232573-63236948	1.32802	0.668334	-0.990638	0.00257886	0.0147437	yes
XLOC_011802	-	chr17:63850067-63852704	0.382963	1.18665	1.63162	0.00353077	0.0190695	yes
XLOC_011847	-	chr17:81298173-81298927	1.95169	0	-1.79769e+308	0.00147466	0.00925762	yes
XLOC_011876	9430020K01Rik	chr18:4634926-4682867	2.88085	1.70273	-0.758651	0.000502988	0.00374473	yes
XLOC_011879	Zeb1	chr18:5491498-5775466	9.60812	22.9862	1.25844	3.61933e-14	1.97372e-12	yes
XLOC_011881	Rab18	chr18:6765202-6790229	20.229	13.4658	-0.587131	0.000590668	0.00430049	yes
XLOC_011884	Colec12	chr18:9707645-9877993	8.17382	4.60601	-0.827493	3.34918e-05	0.000365072	yes
XLOC_011886	Greb1l	chr18:10325104-10564440	20.5531	0.476436	-5.43093	0	0	yes
XLOC_011887	Snrpd1	chr18:10617793-10628228	155.242	88.5524	-0.809915	4.13525e-07	7.33576e-06	yes
XLOC_011893	Cables1	chr18:11979596-12104136	2.24805	0.707273	-1.66833	0.00012683	0.00115657	yes
XLOC_011900	Impact	chr18:13130760-13151461	15.8797	7.2011	-1.14089	1.61276e-10	5.22188e-09	yes
XLOC_011904	Taf4b	chr18:14941744-15060509	2.25738	1.22545	-0.88134	0.00177598	0.0107849	yes
XLOC_011921	Mapre2	chr18:23910833-24052362	29.319	21.4244	-0.452578	0.00480461	0.0244588	yes
XLOC_011934	Ammecr1l	chr18:31919477-31943737	15.126	20.4671	0.436273	0.00744103	0.0349519	yes
XLOC_011935	Polr2d	chr18:31948777-31956525	61.5447	34.5667	-0.832254	9.43682e-06	0.000118914	yes
XLOC_011941	Bin1	chr18:32518710-32595394	12.0459	7.44512	-0.694171	0.00333464	0.0182211	yes
XLOC_011943	Wdr36	chr18:32823295-33027566	21.5219	11.1075	-0.954272	1.08316e-07	2.17325e-06	yes
XLOC_011946	2410004N09Rik	chr18:33954545-34166860	28.634	11.6761	-1.29417	0.00846097	0.0388279	yes
XLOC_011948	Srp19	chr18:34490798-34496253	68.3311	37.5002	-0.865645	8.75066e-07	1.44269e-05	yes
XLOC_011959	Mir1949,Snhg4	chr18:35713063-35721530	51.9522	14.0362	-1.88804	0	0	yes
XLOC_011962	Paip2	chr18:35758320-35786881	98.706	65.1135	-0.600181	0.00044223	0.00335644	yes
XLOC_011966	Psd2	chr18:36124488-36174369	0.469874	1.5326	1.70564	8.57035e-05	0.000824347	yes
XLOC_011972	Slc35a4	chr18:36830812-36843516	32.4095	22.8993	-0.501113	0.00383464	0.0203999	yes
XLOC_011975	Wdr55	chr18:36919892-36925868	23.4225	16.044	-0.545859	0.00672376	0.0321026	yes
XLOC_011977	Zmat2	chr18:36953576-36959314	23.5319	14.1003	-0.73889	4.74695e-05	0.00049651	yes
XLOC_011979	Pcdha1,Pcdha10,Pcdha11,Pcdha12,Pcdha2,Pcdha3,Pcdha4,Pcdha4-g,Pcdha5,Pcdha6,Pcdha7,Pcdha8,Pcdha9,Pcdhac1,Pcdhac2,Pcdhga1,Pcdhga10,Pcdhga11,Pcdhga12,Pcdhga2,Pcdhga3,Pcdhga4,Pcdhga5,Pcdhga6,Pcdhga7,Pcdhga8,Pcdhga9,Pcdhgb1,Pcdhgb2,Pcdhgb4,Pcdhgb5,Pcdhgb6,Pcdhgb7,Pcdhgb8,Pcdhgc3,Pcdhgc4,Pcdhgc5	chr18:37089938-38001526	18.2134	28.8553	0.663831	0.00816305	0.0377869	yes
XLOC_012005	Ndfip1	chr18:38578616-38624847	17.2687	37.6381	1.12403	1.35679e-10	4.43936e-09	yes
XLOC_012029	Eif1a	chr18:46757357-46769879	96.422	37.4021	-1.36624	0	0	yes
XLOC_012031	Ap3s1	chr18:46901570-46950480	11.7594	23.7576	1.01458	1.48534e-07	2.913e-06	yes
XLOC_012038	Gm5506	chr18:48082494-48267634	287.247	116.472	-1.30231	1.55431e-15	9.98359e-14	yes
XLOC_012041	Tnfaip8	chr18:50139080-50252883	10.9611	6.6144	-0.728705	0.000108457	0.00101317	yes
XLOC_012042	Hsd17b4	chr18:50287854-50355924	16.5812	25.4952	0.620678	0.000331474	0.00263383	yes
XLOC_012046	Srfbp1	chr18:52625343-52651761	17.0512	7.59802	-1.16618	4.02376e-06	5.54492e-05	yes
XLOC_012052	Snx24	chr18:53405315-53550479	5.49925	8.91123	0.696388	0.00506105	0.0255873	yes
XLOC_012059	Phax	chr18:56685389-56747366	26.3474	15.9739	-0.721941	0.00122422	0.00791651	yes
XLOC_012063	Megf10	chr18:57292743-57457121	0.747463	11.1238	3.89551	0	0	yes
XLOC_012068	Slc27a6	chr18:58715893-58772523	2.3515	0.447968	-2.39211	9.26087e-10	2.64571e-08	yes
XLOC_012069	Isoc1	chr18:58819135-58840028	25.0694	16.6496	-0.590436	0.000279546	0.00227403	yes
XLOC_012070	Adamts19	chr18:58996417-59213332	2.88565	0.513078	-2.49165	9.25926e-14	4.869e-12	yes
XLOC_012071	A730017C20Rik	chr18:59222034-59236614	6.29806	2.10375	-1.58195	1.96326e-06	2.95199e-05	yes
XLOC_012079	Rps14	chr18:60934249-60938200	712.025	239.532	-1.57171	0	0	yes
XLOC_012082	Camk2a	chr18:61085285-61147806	0.613655	2.22556	1.85867	9.54839e-05	0.000903886	yes
XLOC_012093	Apcdd1	chr18:63081980-63114002	5.70622	1.68497	-1.75982	1.75415e-13	8.85916e-12	yes
XLOC_012096	St8sia3	chr18:64317377-64436834	8.12824	1.57504	-2.36756	0	0	yes
XLOC_012097	Onecut2	chr18:64500017-64558142	0.369052	1.14571	1.63434	6.96329e-10	2.03488e-08	yes
XLOC_012098	Nedd4l	chr18:65047409-65377480	1.54127	5.58642	1.85781	0	0	yes
XLOC_012111	Tubb6	chr18:67550384-67562403	39.8549	8.76448	-2.18502	0	0	yes
XLOC_012114	Seh1l	chr18:67934529-67959597	48.8109	24.2516	-1.00912	3.94986e-09	1.02168e-07	yes
XLOC_012119	Tcf4	chr18:69504145-69847621	8.93103	15.0231	0.750288	1.25189e-05	0.000153115	yes
XLOC_012122	Mbd2	chr18:70727945-70785785	5.11852	10.1196	0.983348	0.00067072	0.00476829	yes
XLOC_012129	Myo5b	chr18:74602272-74931580	2.40884	4.27716	0.828316	0.000866751	0.0059721	yes
XLOC_012130	Acaa2	chr18:74938865-74965861	11.3543	17.1453	0.594575	0.00745741	0.0350116	yes
XLOC_012131	Rpl17	chr18:75160113-75163035	737.81	466.667	-0.660856	7.45732e-05	0.000731253	yes
XLOC_012133	BC031181	chr18:75165553-75169587	27.9786	19.294	-0.53617	0.00714151	0.0338122	yes
XLOC_012140	Ier3ip1	chr18:77168765-77180353	20.5807	13.319	-0.627808	0.000902996	0.00617979	yes
XLOC_012150	Pard6g	chr18:80243633-80316379	5.44004	8.61499	0.66323	0.00474177	0.0242033	yes
XLOC_012151	Txnl4a	chr18:80403536-80422590	46.6836	30.9993	-0.590679	0.00389605	0.0206691	yes
XLOC_012153	Mbp	chr18:82644514-82755029	1.78506	4.40368	1.30273	1.72628e-05	0.000204167	yes
XLOC_012161	Cbln2	chr18:86882439-86887675	1.39343	0.534163	-1.38329	0.0013728	0.00872115	yes
XLOC_012175	Mpp7	chr18:7347959-7626861	1.79334	4.76729	1.41052	1.10778e-09	3.12744e-08	yes
XLOC_012189	Npc1	chr18:12327238-12394895	8.36302	5.56981	-0.586396	0.00202857	0.0120102	yes
XLOC_012195	Aqp4	chr18:15547902-15562193	1.07885	0.224036	-2.26769	3.7869e-10	1.15791e-08	yes
XLOC_012197	Cdh2	chr18:16747385-16967558	54.9952	84.7618	0.624107	0.000142158	0.00127449	yes
XLOC_012201	Dsc2	chr18:20189033-20218006	1.02926	0.417932	-1.30026	0.00165745	0.0101879	yes
XLOC_012208	Nol4	chr18:22851655-23200154	0.241654	1.36385	2.49667	0.00151569	0.00947171	yes
XLOC_012214	Rprd1a	chr18:24643462-24688705	21.0616	14.6201	-0.526668	0.00102755	0.00687226	yes
XLOC_012215	Slc39a6	chr18:24738381-24762318	21.4855	32.2409	0.58553	0.000284354	0.00231118	yes
XLOC_012217	Celf4	chr18:25636120-25912484	1.44333	4.38846	1.60431	4.39149e-07	7.72588e-06	yes
XLOC_012220	Syt4	chr18:31597459-31607069	0.10562	1.24251	3.55631	2.026e-07	3.8741e-06	yes
XLOC_012227	Gypc	chr18:32687973-32719688	0.168069	4.18102	4.63673	2.91761e-08	6.51645e-07	yes
XLOC_012233	Reep5	chr18:34504539-34533069	3.87167	6.17931	0.67449	0.00307518	0.0170516	yes
XLOC_012234	Fam13b	chr18:34569076-34666477	15.8083	29.4721	0.898666	0.00792577	0.0368938	yes
XLOC_012240	Cdc25c	chr18:34892650-34911187	11.1741	16.1064	0.527478	0.00800309	0.0371723	yes
XLOC_012241	Etf1	chr18:35062438-35091657	80.1566	42.8135	-0.904754	2.56574e-08	5.77095e-07	yes
XLOC_012249	Ecscr	chr18:35872716-35882028	1.93901	0.677117	-1.51784	0.00698882	0.0332025	yes
XLOC_012252	Pfdn1	chr18:36563332-36614168	26.1986	15.3478	-0.771459	0.00048155	0.00361464	yes
XLOC_012254	Sra1	chr18:36826840-36829965	23.4265	15.2664	-0.617779	0.00798493	0.0371066	yes
XLOC_012260	Hars	chr18:36926181-36942859	31.2802	21.9279	-0.512482	0.00297912	0.0166103	yes
XLOC_012262	Taf7	chr18:37089938-38001526	13.3705	6.4245	-1.0574	0.00027317	0.00223069	yes
XLOC_012266	Arap3	chr18:38132276-38158623	1.87763	0.658493	-1.51168	1.44592e-05	0.000173738	yes
XLOC_012267	Pcdh1	chr18:38351703-38369416	6.10785	1.55146	-1.97704	1.62563e-11	6.03028e-10	yes
XLOC_012271	Spry4	chr18:38745918-38760922	3.85405	0.747003	-2.36719	0	0	yes
XLOC_012275	Prelid2	chr18:42034577-42111008	12.3215	3.50271	-1.81463	4.93834e-07	8.58535e-06	yes
XLOC_012282	Dpysl3	chr18:43483767-43597978	5.59681	16.6211	1.57034	4.70286e-09	1.19864e-07	yes
XLOC_012283	Jakmip2	chr18:43687790-43847427	6.33549	13.7685	1.11985	4.03665e-08	8.75034e-07	yes
XLOC_012289	Mcc	chr18:44584713-44971836	2.93216	0.963586	-1.60548	2.26796e-12	9.62552e-11	yes
XLOC_012292	Trim36	chr18:46324953-46372261	0.712793	2.06186	1.53239	5.30994e-06	7.06306e-05	yes
XLOC_012299	Cdo1	chr18:46872858-46887996	0.911243	4.45299	2.28887	1.78589e-06	2.72163e-05	yes
XLOC_012306	Ppic	chr18:53565994-53577661	8.01532	31.4708	1.97318	0	0	yes
XLOC_012308	Zfp608	chr18:55047698-55152302	12.418	6.70265	-0.889632	9.19681e-05	0.000877111	yes
XLOC_012310	Aldh7a1	chr18:56685389-56747366	14.9865	7.85175	-0.932582	0.000141131	0.00126707	yes
XLOC_012316	Fbn2	chr18:58168273-58369580	12.5088	2.00242	-2.64313	0	0	yes
XLOC_012318	2010002N04Rik	chr18:60633844-60661637	4.61556	2.00859	-1.20032	8.52659e-05	0.00082055	yes
XLOC_012321	Ndst1	chr18:60844144-60873392	7.13484	14.6445	1.0374	5.84654e-08	1.23383e-06	yes
XLOC_012322	Tcof1	chr18:60973407-61008618	44.1148	23.8284	-0.888578	2.77557e-06	4.00658e-05	yes
XLOC_012324	Cdx1	chr18:61178515-61195853	1.00333	0.0260757	-5.26595	0.00085844	0.00593191	yes
XLOC_012326	Slc26a2	chr18:61352529-61371268	4.01285	2.37903	-0.754257	5.59162e-05	0.000570518	yes
XLOC_012342	Fam38b	chr18:63169866-63546837	1.19355	0.472726	-1.33619	0.000180242	0.00154848	yes
XLOC_012346	Nars	chr18:64659300-64676211	59.7209	43.365	-0.461705	0.00497505	0.0252315	yes
XLOC_012349	Rax	chr18:66094292-66098746	12.3023	0.308517	-5.31743	8.21565e-15	4.89893e-13	yes
XLOC_012351	Lman1	chr18:66140231-66162289	39.7253	16.2027	-1.29382	9.22018e-12	3.50862e-10	yes
XLOC_012359	Spire1	chr18:67647862-67770115	12.7696	18.4842	0.53358	0.00221576	0.0129541	yes
XLOC_012361	Ptpn2	chr18:67825154-67884275	22.6806	14.8112	-0.614769	0.00284082	0.0159836	yes
XLOC_012370	Dcc	chr18:71413239-72510723	0.863478	7.45628	3.11022	0	0	yes
XLOC_012373	Me2	chr18:73927511-73975288	32.4291	20.5205	-0.660221	0.000228862	0.00191128	yes
XLOC_012378	Lipg	chr18:75098975-75120917	1.19169	0.502524	-1.24574	0.00123755	0.00798918	yes
XLOC_012388	Haus1	chr18:77996184-78007135	46.0439	29.3222	-0.651017	0.000801802	0.00559203	yes
XLOC_012392	Setbp1	chr18:78947116-79306195	1.89407	10.3616	2.45168	0	0	yes
XLOC_012401	Sall3	chr18:81160137-81183385	8.54086	4.20998	-1.02057	8.66182e-08	1.76191e-06	yes
XLOC_012408	Tshz1	chr18:84180928-84255954	0.738935	4.94313	2.7419	0	0	yes
XLOC_012411	Cndp2	chr18:84836854-84855025	16.6412	9.28449	-0.841864	0.000411884	0.00316494	yes
XLOC_012413	Socs6	chr18:89034560-89063665	10.6485	15.1018	0.504074	0.00207804	0.0122727	yes
XLOC_012479	-	chr18:31778850-31780253	1.51703	0.519369	-1.54642	0.00453216	0.0233549	yes
XLOC_012486	-	chr18:35091751-35093653	3.70405	1.71843	-1.10801	0.000497598	0.00371037	yes
XLOC_012518	-	chr18:46394544-46397064	5.37593	8.39829	0.643581	0.00405591	0.0213398	yes
XLOC_012593	-	chr18:82862394-82863202	1.35017	5.93099	2.13513	0.00020805	0.0017613	yes
XLOC_012609	Mrpl21	chr19:3283039-3292837	77.4245	34.9655	-1.14686	7.02965e-10	2.05059e-08	yes
XLOC_012610	Cpt1a	chr19:3323300-3385733	0.0343548	2.77001	6.33324	5.06569e-07	8.77488e-06	yes
XLOC_012618	Acy3	chr19:3986537-3990007	1.12232	0.138963	-3.01371	0.0011601	0.00758123	yes
XLOC_012634	Spnb3	chr19:4711222-4752352	1.65864	3.6911	1.15405	2.25245e-06	3.32928e-05	yes
XLOC_012637	Ctsf	chr19:4855128-4861052	2.86153	1.11073	-1.36527	0.00151447	0.00946716	yes
XLOC_012639	Mrpl11	chr19:4962161-4966995	14.2578	8.11003	-0.813977	6.04825e-05	0.000611566	yes
XLOC_012654	Efemp2	chr19:5474689-5481854	0.997675	3.15853	1.66261	0.00185283	0.011149	yes
XLOC_012665	Fau	chr19:6057887-6059524	461.963	169.403	-1.44732	0	0	yes
XLOC_012676	Ehd1	chr19:6276895-6300096	11.2464	7.89931	-0.50966	0.00955923	0.0427507	yes
XLOC_012684	Trmt112	chr19:6984187-6996298	94.4861	65.3795	-0.531265	0.00359958	0.019343	yes
XLOC_012691	2700081O15Rik	chr19:7492114-7557779	9.49014	24.8679	1.38978	0.00743319	0.0349322	yes
XLOC_012699	Wdr74	chr19:8810328-8815114	54.4834	26.6896	-1.02954	1.69616e-08	3.94008e-07	yes
XLOC_012709	Ubxn1	chr19:8946048-8950146	38.3871	24.3347	-0.657605	0.000953123	0.00645111	yes
XLOC_012710	1810009A15Rik,Ganab,Ints5	chr19:8963345-8991237	103.051	63.5778	-0.696767	0.00878008	0.0400523	yes
XLOC_012712	Eml3	chr19:9004183-9016072	11.4208	5.00561	-1.19005	0.000258038	0.0021207	yes
XLOC_012715	Eef1g	chr19:9041530-9052670	689.821	486.789	-0.502927	0.0053627	0.026766	yes
XLOC_012717	Fth1	chr19:10057192-10059582	340.234	199.334	-0.771338	1.00087e-06	1.61805e-05	yes
XLOC_012720	Fads1	chr19:10257377-10271362	34.1663	49.0422	0.521452	0.00109712	0.00725888	yes
XLOC_012721	1810006K21Rik	chr19:10278691-10282314	54.741	18.9889	-1.52746	2.35357e-08	5.33765e-07	yes
XLOC_012730	Prpf19	chr19:10969720-10984049	10.6391	7.35028	-0.533506	0.00250347	0.0143771	yes
XLOC_012739	Ms4a4d	chr19:11611338-11632956	1.3311	0.0158149	-6.39519	3.77909e-05	0.000405696	yes
XLOC_012788	Gnaq	chr19:16207320-16463053	11.7332	18.1421	0.628742	0.000428604	0.0032737	yes
XLOC_012794	2410127L17Rik	chr19:18745269-18782856	20.7946	12.7068	-0.710602	0.000551595	0.00405612	yes
XLOC_012802	Tmem2	chr19:21852831-21934405	6.99098	18.8613	1.43186	1.19904e-14	6.9548e-13	yes
XLOC_012826	Rcl1	chr19:29175864-29219170	18.0537	6.26099	-1.52783	4.11833e-11	1.44906e-09	yes
XLOC_012828	Jak2	chr19:29326317-29387570	2.01856	4.15351	1.041	1.00638e-05	0.000125821	yes
XLOC_012840	Minpp1	chr19:32560258-32589860	26.1183	15.9998	-0.707007	3.83809e-05	0.000411568	yes
XLOC_012842	Pten	chr19:32832066-32900650	29.0701	17.4646	-0.735098	4.47389e-06	6.07769e-05	yes
XLOC_012866	Cep55	chr19:38129514-38148915	5.36479	9.0536	0.754971	0.00266795	0.0151805	yes
XLOC_012870	Tmem20	chr19:38470469-38480097	15.3028	4.72668	-1.69489	0	0	yes
XLOC_012883	Ccnj	chr19:40905768-40924400	9.50235	14.3996	0.59967	0.00173444	0.0105561	yes
XLOC_012885	Zfp518a	chr19:40969194-40992437	13.7248	9.58676	-0.517674	0.0011186	0.00736789	yes
XLOC_012887	Lcor	chr19:41557142-41642577	4.91765	11.8555	1.26952	7.41909e-06	9.55645e-05	yes
XLOC_012889	Frat1	chr19:41904459-41907073	1.24518	0.452974	-1.45886	0.00279292	0.0157669	yes
XLOC_012890	Pgam1	chr19:41986360-41993155	834.396	337.467	-1.30599	6.40665e-12	2.54419e-10	yes
XLOC_012911	Wnt8b	chr19:44567807-44590941	8.91638	20.8901	1.22829	2.90519e-09	7.65955e-08	yes
XLOC_012913	Pax2	chr19:44831253-44912703	9.29432	0.370208	-4.64994	0	0	yes
XLOC_012915	Sema4g	chr19:45063777-45077885	0.757657	2.07912	1.45636	0.000975535	0.00658417	yes
XLOC_012916	Peo1	chr19:45081047-45087252	7.36684	3.69883	-0.993976	4.71927e-06	6.36138e-05	yes
XLOC_012924	Pprc1	chr19:46131028-46147399	30.2772	13.366	-1.17966	5.01821e-13	2.37756e-11	yes
XLOC_012931	Tmem180	chr19:46431369-46449744	5.02358	2.45593	-1.03244	0.000448412	0.0033952	yes
XLOC_012945	Sfr1	chr19:47806221-47810078	106.104	79.1206	-0.42335	0.00905264	0.0409546	yes
XLOC_012946	Gsto1	chr19:47929478-47939278	17.2814	7.59444	-1.18621	8.78287e-07	1.44676e-05	yes
XLOC_012954	Mxi1	chr19:53384967-53453582	2.89934	5.07207	0.806853	0.000544379	0.00400767	yes
XLOC_012955	Dusp5	chr19:53602373-53616913	4.27664	0.39184	-3.44814	0	0	yes
XLOC_012962	Acsl5	chr19:55327858-55371118	3.88243	5.93559	0.61243	0.00761858	0.0356442	yes
XLOC_012963	Vti1a	chr19:55390840-55701051	4.70275	9.94261	1.08012	2.87746e-07	5.31723e-06	yes
XLOC_012964	Tcf7l2	chr19:55816299-56008145	27.9629	9.09356	-1.6206	0	0	yes
XLOC_012971	Vwa2	chr19:56948905-56986746	1.78968	0.24138	-2.89033	0.000570826	0.00417189	yes
XLOC_012987	Emx2	chr19:59533179-59540775	25.3624	43.6692	0.783928	7.86076e-06	0.000100779	yes
XLOC_012989	E330013P04Rik	chr19:60220500-60247171	5.24081	13.3936	1.35368	0.00120222	0.00780854	yes
XLOC_013020	Gm960,Rce1	chr19:4622538-4698668	7.19916	3.3969	-1.08361	0.00246926	0.0142276	yes
XLOC_013022	Rbm14	chr19:4797445-4811634	20.5964	13.6553	-0.592929	0.0039019	0.0206779	yes
XLOC_013024	Actn3	chr19:4861222-4878010	3.18175	0.367993	-3.11207	0.000116714	0.00107994	yes
XLOC_013025	Bbs1	chr19:4886881-4906627	2.94173	4.46728	0.602733	0.00501628	0.0254079	yes
XLOC_013030	Cnih2	chr19:5088537-5098418	2.73739	7.80573	1.51173	0.00130949	0.00838573	yes
XLOC_013031	Rab1b	chr19:5099206-5106996	23.8941	15.9343	-0.584523	0.00237729	0.013764	yes
XLOC_013036	Banf1	chr19:5364639-5366645	123.955	67.8881	-0.868582	9.07568e-07	1.48731e-05	yes
XLOC_013052	Malat1	chr19:5795689-5802671	103.985	297.038	1.51428	1.57219e-11	5.84335e-10	yes
XLOC_013065	Snx15	chr19:6119403-6128215	1.93724	6.38087	1.71975	0.00524499	0.0263295	yes
XLOC_013078	Fkbp2	chr19:7051906-7054951	29.5495	17.2531	-0.776277	0.0104423	0.0456651	yes
XLOC_013084	Flrt1	chr19:7131257-7272552	0.346865	1.95222	2.49267	5.12927e-10	1.53645e-08	yes
XLOC_013086	Cox8a	chr19:7289647-7292106	113.077	59.9375	-0.915778	2.56439e-06	3.74409e-05	yes
XLOC_013101	Polr2g	chr19:8867618-8873047	52.7224	30.8133	-0.774861	3.84711e-05	0.000412304	yes
XLOC_013104	AI462493	chr19:8954503-8955423	10.8621	5.76302	-0.914411	0.00475375	0.0242385	yes
XLOC_013105	5730408K05Rik,Mir5136	chr19:8960672-8963264	6.49915	0.69741	-3.22017	0.00420743	0.0220008	yes
XLOC_013113	Gm98	chr19:10282760-10315238	2.91444	0.973799	-1.58152	3.2178e-05	0.000352603	yes
XLOC_013126	Tmem109	chr19:10945148-10956233	6.25669	2.94474	-1.08726	0.000932585	0.00634575	yes
XLOC_013128	Ccdc86	chr19:11011649-11023756	8.97307	5.28857	-0.762723	0.000297573	0.00240128	yes
XLOC_013145	Stx3	chr19:11849607-11893893	4.9121	2.56309	-0.938457	0.00141568	0.00895365	yes
XLOC_013159	Dtx4	chr19:12540098-12576486	13.1987	18.5066	0.487643	0.00350875	0.0189667	yes
XLOC_013176	Tle4	chr19:14522542-14672473	36.0107	21.7759	-0.725691	9.23014e-06	0.00011654	yes
XLOC_013179	Vps13a	chr19:16689855-16855423	2.42026	6.22166	1.36214	2.15628e-12	9.23339e-11	yes
XLOC_013181	Gcnt1	chr19:17400630-17447334	5.2959	0.387504	-3.77259	0	0	yes
XLOC_013200	Foxd4	chr19:24973454-24975799	3.04322	0.00581651	-9.03123	6.10489e-05	0.000615992	yes
XLOC_013205	D19Bwg1357e	chr19:27463191-27504310	41.7852	22.0408	-0.922813	6.64045e-09	1.65286e-07	yes
XLOC_013207	Glis3	chr19:28333349-28794517	3.44013	1.94589	-0.822036	6.40094e-05	0.000638793	yes
XLOC_013209	Ak3	chr19:29064873-29123219	6.83991	13.787	1.01126	9.44255e-05	0.000895195	yes
XLOC_013214	Ermp1	chr19:29684372-29722910	10.1929	7.01783	-0.538464	0.00167442	0.0102808	yes
XLOC_013217	Gldc	chr19:30172936-30249908	33.3623	18.8191	-0.826022	3.48893e-07	6.32401e-06	yes
XLOC_013219	Dkk1	chr19:30620373-30623986	5.5185	0.0995135	-5.79324	0	0	yes
XLOC_013225	Atad1	chr19:32747052-32786788	60.9335	42.4104	-0.522817	0.000913706	0.00624393	yes
XLOC_013235	Pank1	chr19:34883035-34954899	3.96371	7.3494	0.890775	0.000323131	0.00257817	yes
XLOC_013241	Fgfbp3	chr19:36992039-36994089	0.716145	3.85556	2.42862	2.44328e-06	3.58642e-05	yes
XLOC_013248	Noc3l	chr19:38862617-38893727	14.6291	7.71949	-0.922259	6.63438e-08	1.37732e-06	yes
XLOC_013256	Pdlim1	chr19:40296728-40346106	2.25032	11.022	2.29218	2.41956e-10	7.68038e-09	yes
XLOC_013267	Frat2	chr19:41920464-41922622	16.5426	11.1258	-0.572274	0.00431935	0.0224421	yes
XLOC_013268	Rrp12	chr19:41933797-41970694	11.3589	5.44901	-1.05976	9.78689e-07	1.58755e-05	yes
XLOC_013269	Exosc1	chr19:41994580-42007804	17.9928	12.4538	-0.530838	0.0114446	0.0490832	yes
XLOC_013271	Morn4	chr19:42149428-42160860	10.837	16.9927	0.648948	0.00231276	0.0134555	yes
XLOC_013289	Bloc1s2	chr19:44213736-44220936	21.6156	11.3176	-0.933503	5.87079e-05	0.000596142	yes
XLOC_013291	Scd1	chr19:44468939-44482199	31.5307	12.4002	-1.34639	0	0	yes
XLOC_013292	Sec31b	chr19:44591057-44620338	0.483833	1.82661	1.91659	0.00762009	0.0356442	yes
XLOC_013293	Ndufb8	chr19:44624743-44629905	75.5182	42.6878	-0.823001	2.93718e-05	0.000325351	yes
XLOC_013302	Fgf8	chr19:45810994-45817374	6.85535	1.61513	-2.08558	0.000368274	0.00289018	yes
XLOC_013312	Actr1a	chr19:46451303-46470225	25.7759	39.8916	0.630062	0.000147519	0.00131395	yes
XLOC_013313	Arl3	chr19:46605598-46647575	36.9917	21.3361	-0.793907	0.000171082	0.00149053	yes
XLOC_013316	Pcgf6	chr19:47108108-47125349	29.5824	18.9612	-0.641691	0.00164002	0.0100938	yes
XLOC_013317	Usmg5	chr19:47142237-47165115	101.772	44.2689	-1.20098	0.000498404	0.00371493	yes
XLOC_013320	Sh3pxd2a	chr19:47334346-47538901	2.09806	3.30845	0.6571	0.00265111	0.0150982	yes
XLOC_013325	Sorcs1	chr19:50217790-50753176	0.784581	2.39372	1.60926	0.000128954	0.00117315	yes
XLOC_013326	Xpnpep1	chr19:53065670-53113155	23.546	15.5214	-0.601224	0.00210329	0.012402	yes
XLOC_013333	Zdhhc6	chr19:55372788-55390522	28.0573	16.2013	-0.792269	4.85317e-06	6.52349e-05	yes
XLOC_013339	Ablim1	chr19:57107724-57290522	13.064	3.43038	-1.92916	0	0	yes
XLOC_013341	Gfra1	chr19:58308687-58529003	0.269934	1.22695	2.1844	0.000630566	0.00454944	yes
XLOC_013345	4930506M07Rik	chr19:59047847-59150559	3.20378	1.88553	-0.764805	0.00157534	0.0097679	yes
XLOC_013348	Emx2os	chr19:59499593-59533125	1.04177	4.03079	1.95203	9.89431e-13	4.47723e-11	yes
XLOC_013349	Rab11fip2	chr19:59978786-60019557	4.21033	6.50333	0.627245	0.000958734	0.00647992	yes
XLOC_013425	-	chr19:34881314-34882806	0.281082	1.33521	2.248	0.00454813	0.0233972	yes
XLOC_013456	-	chr19:41656264-41670734	4.10405	2.98739	-0.458164	0.00707454	0.0335515	yes
XLOC_013528	Frmd4a	chr2:4073908-4535089	7.18718	14.1218	0.974423	2.63616e-07	4.9228e-06	yes
XLOC_013531	Phyh	chr2:4840041-4859789	4.4214	8.21064	0.892992	0.00126744	0.00816834	yes
XLOC_013534	Nudt5	chr2:5766079-5816399	25.0803	14.857	-0.755413	0.00455463	0.0234166	yes
XLOC_013592	Vim	chr2:13495937-13504453	11.9438	512.371	5.42285	0	0	yes
XLOC_013604	Commd3	chr2:18594088-18597843	5.79187	14.3471	1.30866	5.16571e-05	0.000534181	yes
XLOC_013605	Bmi1	chr2:18598644-18608256	7.06195	10.3377	0.549781	0.00192456	0.0114796	yes
XLOC_013612	Etl4	chr2:20211539-20732162	6.0908	2.93998	-1.05082	8.58933e-07	1.41854e-05	yes
XLOC_013613	Gm13375	chr2:20890500-20892447	0.654454	3.14876	2.26642	0.00389721	0.0206696	yes
XLOC_013617	Gad2	chr2:22477846-22549397	0.877767	4.61009	2.39288	6.74194e-12	2.66055e-10	yes
XLOC_013626	Il1f9	chr2:24041995-24049087	1.50865	6.05308	2.00441	3.6459e-08	7.96646e-07	yes
XLOC_013634	Nelf	chr2:24909898-24918401	1.94525	4.43448	1.18881	0.00093474	0.00635557	yes
XLOC_013636	Nrarp	chr2:25036277-25038852	4.79632	17.5417	1.87079	2.22045e-16	1.5978e-14	yes
XLOC_013652	Fbxw5	chr2:25356297-25361088	6.88035	12.0964	0.814027	0.00107487	0.00712396	yes
XLOC_013659	Bmyc	chr2:25562398-25563239	42.0913	28.9416	-0.540378	0.0108767	0.0471445	yes
XLOC_013675	5930434B04Rik	chr2:26865445-26876851	38.0474	61.62	0.695601	0.00070344	0.00498133	yes
XLOC_013678	-	chr2:27297788-27299836	0.765369	2.1168	1.46766	0.00437408	0.0226649	yes
XLOC_013679	Wdr5	chr2:27370666-27392137	16.4576	10.5121	-0.646707	0.000562905	0.00412187	yes
XLOC_013680	Rxra	chr2:27532720-27618839	4.02362	7.1982	0.839141	4.4025e-05	0.000464033	yes
XLOC_013685	Mrps2	chr2:28323585-28326697	24.7608	16.4185	-0.592732	0.00106366	0.00706206	yes
XLOC_013687	Ralgds	chr2:28368686-28408602	3.4439	6.2788	0.866444	0.00104715	0.0069741	yes
XLOC_013691	Ddx31	chr2:28695925-28761120	4.54752	2.63133	-0.789284	0.00886517	0.0403293	yes
XLOC_013700	Cercam	chr2:29725013-29738360	0.950287	2.6369	1.47241	0.000390763	0.00303678	yes
XLOC_013704	Set	chr2:29917515-29928097	281.478	161.674	-0.799936	7.39865e-06	9.53654e-05	yes
XLOC_013716	Mettl11a	chr2:30663493-30678550	15.3982	9.34408	-0.720636	0.00998642	0.0441455	yes
XLOC_013717	Prrx2	chr2:30700886-30736767	3.39889	0.787697	-2.10935	0.000125593	0.00114748	yes
XLOC_013721	Ncs1	chr2:31101442-31150991	7.64638	5.14859	-0.570599	0.00401173	0.0211306	yes
XLOC_013723	Fubp3	chr2:31428244-31473039	42.3069	29.3787	-0.526124	0.00088975	0.00610419	yes
XLOC_013725	Exosc2	chr2:31526256-31536827	34.5326	18.1984	-0.924144	3.27838e-07	5.99345e-06	yes
XLOC_013738	Fam102a	chr2:32390878-32425270	1.59698	3.23686	1.01925	0.000449531	0.00340232	yes
XLOC_013744	Sh2d3c	chr2:32576574-32610754	1.42664	3.8042	1.41497	0.000241628	0.00200564	yes
XLOC_013748	Rpl12	chr2:32817231-32819565	1014.79	460.666	-1.13938	7.01639e-12	2.75206e-10	yes
XLOC_013750	Angptl2	chr2:32988906-33226998	3.26393	5.61341	0.782265	0.00725179	0.0342394	yes
XLOC_013756	Cep110	chr2:34965011-35034342	7.53032	11.5593	0.618267	0.00112761	0.00741192	yes
XLOC_013786	Crb2	chr2:37631768-38142904	6.09459	11.1428	0.870509	0.000518987	0.00384291	yes
XLOC_013787	Lhx2	chr2:38194960-38225248	136.983	248.936	0.861776	1.43192e-07	2.82081e-06	yes
XLOC_013788	Nek6	chr2:38367216-38443010	10.4283	18.7365	0.845352	2.37397e-06	3.49003e-05	yes
XLOC_013790	Olfml2a	chr2:38787468-38816906	1.42332	0.130498	-3.44715	0.000823643	0.00572453	yes
XLOC_013797	Acvr2a	chr2:48669628-48804787	9.14544	14.0041	0.614728	0.00205337	0.0121345	yes
XLOC_013800	Kif5c	chr2:49474833-49630298	12.0994	27.5505	1.18715	1.67644e-13	8.51159e-12	yes
XLOC_013802	Lypd6	chr2:49921948-50049089	0.204796	1.66291	3.02145	2.70318e-07	5.02822e-06	yes
XLOC_013813	Kcnj3	chr2:55289161-55450492	2.35668	0.0950304	-4.63223	5.92817e-06	7.81482e-05	yes
XLOC_013820	Pkp4	chr2:58998906-59193262	28.333	20.8377	-0.443285	0.00874763	0.0399424	yes
XLOC_013822	Tanc1	chr2:59450100-59684220	2.72711	3.98884	0.548596	0.010561	0.0460789	yes
XLOC_013827	Tbr1	chr2:61642509-61652171	0.0430521	8.13284	7.56153	0.00103247	0.0068955	yes
XLOC_013829	Gca	chr2:62502383-62534091	0.631303	2.28807	1.85772	9.27042e-07	1.51533e-05	yes
XLOC_013831	Csrnp3	chr2:65683823-65869603	0.738268	1.98728	1.42858	3.00542e-09	7.88037e-08	yes
XLOC_013842	Bbs5	chr2:69485311-69505626	4.42483	2.53414	-0.804126	0.00668075	0.0319448	yes
XLOC_013846	Klhl23	chr2:69660019-69674708	3.89039	6.6266	0.768351	0.000486716	0.00364485	yes
XLOC_013854	Dcaf17	chr2:70893800-70937199	9.402	5.891	-0.674455	0.00254628	0.014588	yes
XLOC_013859	Dlx1	chr2:71367501-71375948	0.0289609	6.17789	7.73686	1.36413e-06	2.13323e-05	yes
XLOC_013861	Itga6	chr2:71625127-71696540	11.1837	16.6545	0.574519	0.000711141	0.00502834	yes
XLOC_013865	Cdca7	chr2:72314275-72324947	44.4126	23.7877	-0.900755	3.49197e-08	7.67391e-07	yes
XLOC_013868	Sp9	chr2:73109982-73113828	0.0361309	1.20795	5.06319	8.23306e-05	0.000797919	yes
XLOC_013890	Ube2e3	chr2:78709203-78760740	90.6489	131.77	0.539666	0.000934948	0.00635557	yes
XLOC_013896	Dnajc10	chr2:80155622-80194212	34.8625	23.2599	-0.583831	0.000218846	0.00183806	yes
XLOC_013899	Nup35	chr2:80478968-80500228	9.54104	6.78403	-0.492005	0.00855544	0.0392145	yes
XLOC_013901	Zc3h15	chr2:83484734-83504773	76.6361	56.6876	-0.434991	0.00595211	0.0290784	yes
XLOC_013902	Itgav	chr2:83564553-83647084	3.78963	5.50919	0.539784	0.00256781	0.0146904	yes
XLOC_013903	Fam171b	chr2:83652757-83723661	7.26564	20.4855	1.49544	0	0	yes
XLOC_013908	Timm10	chr2:84667177-84670370	19.2467	9.69418	-0.989418	0.000635916	0.00457424	yes
XLOC_013909	Slc43a1	chr2:84678951-84703743	13.4547	8.82362	-0.608662	0.00722871	0.0341557	yes
XLOC_013915	Aplnr	chr2:84976516-84980080	0.197419	2.15767	3.45015	3.38019e-08	7.44537e-07	yes
XLOC_013997	Mtch2	chr2:90687311-90706791	21.6782	13.7377	-0.658105	0.000182892	0.00156843	yes
XLOC_014001	Rapsn	chr2:90875783-90885886	1.7024	0.324862	-2.38967	0.00454839	0.0233972	yes
XLOC_014006	A330069E16Rik	chr2:91077302-91078514	5.41307	2.04404	-1.40503	0.000211386	0.00178559	yes
XLOC_014007	Pacsin3	chr2:91096969-91104836	0.691159	3.37454	2.2876	6.31108e-05	0.000630812	yes
XLOC_014009	Lrp4	chr2:91297687-91355288	3.95347	6.30981	0.674476	0.00338924	0.0184509	yes
XLOC_014016	Phf21a	chr2:92024172-92204823	7.16924	12.9361	0.851505	3.33452e-06	4.72299e-05	yes
XLOC_014023	Trp53i11	chr2:93027737-93041916	17.8761	38.5322	1.10803	1.10208e-08	2.65012e-07	yes
XLOC_014029	Lrrc4c	chr2:97306994-97471821	0.118813	2.87492	4.59676	1.23458e-10	4.06731e-09	yes
XLOC_014034	Slc1a2	chr2:102498839-102630941	0.558617	3.02669	2.43781	5.13924e-09	1.30119e-07	yes
XLOC_014038	Lmo2	chr2:103798151-103822035	3.21283	9.12006	1.5052	8.53764e-06	0.000108801	yes
XLOC_014049	Immp1l	chr2:105744765-105843706	51.0653	32.3984	-0.65642	0.00285758	0.016059	yes
XLOC_014050	Mpped2	chr2:106533615-106708517	2.6917	11.8595	2.13945	2.59792e-14	1.45826e-12	yes
XLOC_014055	Lgr4	chr2:109757803-109854414	10.7246	3.69069	-1.53896	0	0	yes
XLOC_014056	Ccdc34	chr2:109857973-109891086	49.1344	93.059	0.921412	0.000363731	0.00285903	yes
XLOC_014075	Lpcat4	chr2:112079997-112087886	8.0789	4.61806	-0.806871	0.00578048	0.028414	yes
XLOC_014076	Nop10	chr2:112102125-112103055	83.1952	43.3074	-0.941887	2.3002e-07	4.34202e-06	yes
XLOC_014078	2410042D21Rik	chr2:112219367-112255616	11.3598	6.23266	-0.866017	3.96243e-06	5.48409e-05	yes
XLOC_014080	Aven	chr2:112333120-112471410	5.96989	3.03186	-0.977501	0.0110988	0.047858	yes
XLOC_014091	Fam98b	chr2:117075474-117097276	40.7027	30.4833	-0.417104	0.0116081	0.0495951	yes
XLOC_014101	D2Ertd750e	chr2:118639738-118662943	15.2794	26.2683	0.781734	2.46098e-05	0.000278896	yes
XLOC_014105	Rpusd2	chr2:118860525-118869073	9.31618	5.88002	-0.663917	0.000355825	0.00280051	yes
XLOC_014106	Casc5	chr2:118872854-118933563	13.8747	18.9948	0.453139	0.00824272	0.0380361	yes
XLOC_014111	Spint1	chr2:119063095-119075249	5.93016	0.198044	-4.90418	0	0	yes
XLOC_014121	Mga	chr2:119698386-119795704	20.1047	15.0296	-0.419732	0.0106249	0.0462416	yes
XLOC_014122	Mapkbp1	chr2:119798434-119853139	1.42571	2.83001	0.989125	0.000555983	0.00408211	yes
XLOC_014138	Mtap1a	chr2:121115337-121181060	2.13046	7.49382	1.81453	0	0	yes
XLOC_014140	Pdia3	chr2:121239637-121264422	164.037	92.6052	-0.824855	1.08106e-06	1.73595e-05	yes
XLOC_014141	Serf2	chr2:121274963-121282500	18.3081	10.7579	-0.767092	3.71438e-05	0.000399421	yes
XLOC_014142	2310003F16Rik	chr2:121282823-121284176	166.908	73.2885	-1.18739	7.40852e-12	2.88224e-10	yes
XLOC_014147	Gm9781	chr2:121854318-121944122	67.2283	46.2655	-0.539132	0.00103069	0.00688602	yes
XLOC_014151	Sord	chr2:122060574-122091073	1.43463	3.85582	1.42636	0.000460469	0.00347548	yes
XLOC_014164	Dut	chr2:125072983-125084785	65.6095	38.503	-0.768934	1.33205e-06	2.09161e-05	yes
XLOC_014182	Bcl2l11	chr2:127951773-127988283	19.257	8.2557	-1.22192	1.20957e-11	4.54859e-10	yes
XLOC_014186	Zc3h6	chr2:128793137-128844299	0.228518	1.06009	2.21381	1.55633e-06	2.3966e-05	yes
XLOC_014187	Ttl	chr2:128891682-128925263	1.16999	3.67301	1.65047	2.57266e-07	4.81833e-06	yes
XLOC_014188	Polr1b	chr2:128926580-128954373	11.6068	5.05212	-1.20001	5.25415e-09	1.32503e-07	yes
XLOC_014208	Mrps26	chr2:130389492-130391130	16.3623	10.096	-0.696588	0.00961617	0.0429004	yes
XLOC_014211	Atrn	chr2:130732231-130856062	2.49076	5.57104	1.16136	2.44851e-08	5.53328e-07	yes
XLOC_014219	Prnp	chr2:131735663-131764167	2.24877	3.94543	0.811046	0.00905275	0.0409546	yes
XLOC_014226	Chgb	chr2:132607013-132620808	0.0151506	1.25888	6.37663	0.000105341	0.000986462	yes
XLOC_014234	Snap25	chr2:136539185-136608164	1.78658	4.75058	1.4109	2.96596e-05	0.000327024	yes
XLOC_014242	Snrpb2	chr2:142888804-142897788	62.0825	42.4123	-0.549705	0.000745719	0.00525738	yes
XLOC_014254	Dtd1	chr2:144425688-144594483	28.3586	14.2617	-0.99164	8.80752e-07	1.44832e-05	yes
XLOC_014258	Naa20	chr2:145728976-145742161	14.2317	7.51015	-0.922194	0.000202961	0.00172585	yes
XLOC_014260	Insm1	chr2:146047732-146050754	0.585279	8.10434	3.7915	6.66134e-16	4.53753e-14	yes
XLOC_014263	Plk1s1	chr2:146681624-146795825	7.44435	4.99381	-0.576005	0.0101411	0.0446335	yes
XLOC_014269	Nxt1	chr2:148498350-148504957	18.8353	11.4491	-0.718209	0.00896986	0.040695	yes
XLOC_014280	Zfp937	chr2:150043830-150277255	10.3576	5.88674	-0.815145	0.00534479	0.0266975	yes
XLOC_014290	Fkbp1a	chr2:151368234-151387427	158.049	92.0505	-0.779873	8.09253e-07	1.34228e-05	yes
XLOC_014296	Scrt2	chr2:151907264-151921538	0.0350587	3.56092	6.66633	1.65814e-07	3.21956e-06	yes
XLOC_014297	Srxn1	chr2:151931465-151937089	1.10513	2.62922	1.25042	0.000978758	0.00659894	yes
XLOC_014299	Csnk2a1	chr2:152052575-152107587	51.8021	38.4801	-0.428897	0.00744381	0.0349563	yes
XLOC_014310	Id1	chr2:152561990-152563148	19.0873	5.97358	-1.67595	1.38268e-07	2.73974e-06	yes
XLOC_014311	Cox4i2	chr2:152579908-152590773	2.91214	0.4118	-2.82206	0.000431042	0.0032897	yes
XLOC_014318	Tm9sf4	chr2:152987036-153036199	8.17573	5.80089	-0.495073	0.0113865	0.0489024	yes
XLOC_014321	Asxl1	chr2:153171874-153229743	19.3669	12.1338	-0.674561	2.39352e-05	0.000272056	yes
XLOC_014322	Dnmt3b	chr2:153475189-153513466	52.1691	9.43171	-2.4676	0	0	yes
XLOC_014338	Cbfa2t2	chr2:154262219-154365266	6.7809	10.5036	0.63134	0.000432072	0.00329625	yes
XLOC_014343	Raly	chr2:154616845-154695047	22.1735	10.9779	-1.01423	2.50299e-06	3.66283e-05	yes
XLOC_014349	Trp53inp2	chr2:155207591-155216268	2.97297	14.5326	2.28931	0	0	yes
XLOC_014350	Acss2	chr2:155343776-155388479	1.16515	2.58898	1.15187	0.0041628	0.0218123	yes
XLOC_014361	Epb4.1l1	chr2:156246787-156368950	1.86283	3.21683	0.788138	0.00379388	0.0202224	yes
XLOC_014362	0610011L14Rik	chr2:156373311-156394708	8.56086	5.84592	-0.550324	0.0111684	0.0481148	yes
XLOC_014364	Myl9	chr2:156601199-156607393	5.22461	2.56793	-1.02472	0.00664488	0.0317974	yes
XLOC_014366	1110008F13Rik	chr2:156688857-156712814	13.379	6.45219	-1.05211	0.00298856	0.0166436	yes
XLOC_014368	Rpn2	chr2:157034285-157152054	56.8757	42.351	-0.425416	0.00725364	0.0342397	yes
XLOC_014370	Src	chr2:157250028-157298793	1.82691	3.41118	0.900869	0.00783483	0.0365327	yes
XLOC_014371	Nnat	chr2:157382013-157396474	113.535	583.197	2.36085	0	0	yes
XLOC_014377	Lbp	chr2:158132228-158158588	2.01661	0.808199	-1.31915	0.0043772	0.0226688	yes
XLOC_014378	Snhg11	chr2:158201373-158211881	3.29146	1.27646	-1.36658	6.03587e-10	1.78016e-08	yes
XLOC_014384	Ppp1r16b	chr2:158492468-158592070	2.19833	0.889422	-1.30546	5.44479e-06	7.2324e-05	yes
XLOC_014400	Tox2	chr2:163028896-163150044	3.49184	8.03464	1.20224	0.000379846	0.00296639	yes
XLOC_014422	Wfdc2	chr2:164388188-164394013	51.8116	12.5619	-2.04422	2.82196e-11	1.01532e-09	yes
XLOC_014431	Zswim3	chr2:164630613-164647627	3.10837	1.76907	-0.813164	0.00622468	0.0301332	yes
XLOC_014432	Zswim1	chr2:164648185-164652367	4.9969	2.95258	-0.759055	0.00373695	0.0199746	yes
XLOC_014439	Eya2	chr2:165420468-165597228	9.56476	1.23283	-2.95575	0	0	yes
XLOC_014440	Ncoa3	chr2:165818136-165898742	9.05685	4.85519	-0.899481	2.11039e-06	3.14358e-05	yes
XLOC_014445	Cse1l	chr2:166731595-166771889	120.836	83.4919	-0.533342	0.00154796	0.00963246	yes
XLOC_014446	Ddx27	chr2:166840800-166860445	19.0159	13.203	-0.526339	0.00825601	0.0380791	yes
XLOC_014447	1500012F01Rik	chr2:166861296-166891473	64.8059	32.3198	-1.0037	3.41341e-05	0.00037165	yes
XLOC_014459	Pfdn4	chr2:170308464-170344652	29.618	18.0989	-0.710569	0.00264128	0.0150511	yes
XLOC_014460	Dok5	chr2:170557306-170705275	2.20473	0.280587	-2.97408	2.07737e-07	3.95651e-06	yes
XLOC_014462	2010011I20Rik	chr2:172171076-172181249	1.22623	2.38003	0.956755	0.00247102	0.0142335	yes
XLOC_014467	Tfap2c	chr2:172375092-172384121	0.788494	10.5018	3.73539	0	0	yes
XLOC_014469	Rae1	chr2:172825617-172841240	34.8276	23.3606	-0.576151	0.00107239	0.00711003	yes
XLOC_014486	Gm14306,Gm14436	chr2:175295525-175308823	4.4505	2.26104	-0.976982	1.89402e-05	0.000220654	yes
XLOC_014495	Gm14420	chr2:177249446-177263899	17.7373	9.69488	-0.871493	6.50134e-08	1.35116e-06	yes
XLOC_014496	Gm14403	chr2:177282930-177297016	12.9464	3.57731	-1.8556	0	0	yes
XLOC_014497	Gm14322	chr2:177493992-177507980	13.9113	6.87724	-1.01636	1.43818e-09	3.96659e-08	yes
XLOC_014504	Cdh4	chr2:179177182-179634080	2.25005	9.42227	2.06612	0	0	yes
XLOC_014510	Adrm1	chr2:179906292-179910988	39.9896	24.8482	-0.686482	0.000216185	0.0018181	yes
XLOC_014511	Rps21	chr2:179992083-179993149	921.784	240.023	-1.94126	0	0	yes
XLOC_014539	Myt1	chr2:181498026-181563538	0.0586287	4.24134	6.17677	4.20997e-13	2.0298e-11	yes
XLOC_014543	Rpp38	chr2:3246220-3249900	13.5211	7.90305	-0.774732	0.00191062	0.0114213	yes
XLOC_014547	Hspa14	chr2:3406125-3430086	22.2087	14.894	-0.576393	0.00180276	0.010906	yes
XLOC_014550	Mcm10	chr2:4910762-4933837	22.3635	12.653	-0.821671	3.49737e-06	4.92229e-05	yes
XLOC_014558	Celf2	chr2:6460743-7317825	8.72603	23.3646	1.42093	1.77636e-15	1.13337e-13	yes
XLOC_014566	Pfkfb3	chr2:11392868-11475556	6.96933	4.06228	-0.77873	0.000129412	0.0011762	yes
XLOC_014572	Rsu1	chr2:12998635-13192905	24.5055	15.8052	-0.632707	0.00104896	0.0069837	yes
XLOC_014576	Ptpla	chr2:13947096-13977662	10.2843	4.55766	-1.17408	0.00113544	0.00745576	yes
XLOC_014580	Nebl	chr2:17264715-17653186	2.03893	0.927885	-1.1358	1.26041e-06	1.99715e-05	yes
XLOC_014583	Dnajc1	chr2:17976812-18314457	4.81096	14.9301	1.63382	4.37792e-08	9.45798e-07	yes
[truncated: 1,899 more rows]

## Sheet: E8.5 FAC
Annotation Cluster 1	Enrichment Score: 59.56162059237634
Category	Term	Count	%	PValue	Genes	List Total	Pop Hits	Pop Total	Fold Enrichment	Bonferroni	Benjamini	FDR
SP_PIR_KEYWORDS	ribonucleoprotein	156	7.09091	3.28779e-77	RPL18, MRPS36, RALY, NAF1, RPL17, SRP14, MRPS35, RPL36A, MRPL42, RPL19, RPL14, RPL13, LSM6, SNRPD3, SRP68, RPL15, LSM7, SNRPD1, RPLP2, SNRPD2, RPS27L, RPL22L1, SRP19, IMP3, RPLP0, RPLP1, LSM5, U2AF1, MRPL36, LSM4, RPL10, FAU, RPL11, LSM3, RPL12, LSM2, LSM1, MRPL32, IMP4, RPS27A, RPL36AL, MRPL52, SNRPA1, RPL35A, KRR1, MRPL51, MRPL50, RRP9, MRTO4, PA2G4, RPS18, RPS19, MRPS18C, MRPS18B, RPS16, RPS17…	2045	266	17854	5.12018	1.75897e-74	8.79484e-75	4.77958e-74
GOTERM_CC_FAT	GO:0030529~ribonucleoprotein complex	208	9.45455	1.08037e-75	RPL18, RPL17, NAF1, MRPL42, RPL19, RPL14, RPL13, LSM6, RPL15, LSM7, SRP68, RPLP2, RPL22L1, RBM8A, RPLP0, RPLP1, LSM5, MRPL36, U2AF1, RPL10, FAU, LSM4, RPL11, LSM3, RPL12, LSM2, LSM1, MRPL32, KRR1, MRPL52, MRPL51, MRPL50, RPS18, RPS19, RPS16, RPS17, WDR89, RPS14, RPS15, RPS12, RPS13, RPS10, MRPL47, SRP72, RPS11, SIP1, MRPL45, GM8580, GM13253, TDRD7, NHP2L1, BOP1, CALR, NAA38, RPS25, RPS26, RPS27, …	1452	462	12504	3.87707	5.92042e-73	5.92042e-73	1.57582e-72
GOTERM_MF_FAT	GO:0003735~structural constituent of ribosome	106	4.81818	4.46623e-65	RPL18, RPL17, RPL36A, RPL19, RPL14, RPL13, RPL15, RPLP2, RPS27L, RPL22L1, RPLP0, RPLP1, MRPL36, RPL10, FAU, RPL11, RPL12, MRPL32, RPS27A, RPL36AL, MRPL52, RPL35A, MRPL51, RSL1D1, RPS18, MRPS18C, RPS19, MRPS18B, RPS16, RPS17, WDR89, RPS14, RPS15, RPS12, RPS13, MRPL47, RPS11, UBA52, GM8580, MRPS16, MRPS15, GM13253, MRPS14, MRPS12, MRPS11, RPS26, RPS27, RPS28, RPS29, RPL7, RPL6, RPL9, RPL8, RPL3, RP…	1489	151	13288	6.26461	4.86819e-62	4.86819e-62	7.134e-62
SP_PIR_KEYWORDS	ribosomal protein	115	5.22727	1.39287e-63	MRPS36, RPL18, MRPS35, RPL17, RPL36A, MRPL42, RPL19, RPL14, RPL13, RPL15, RPLP2, RPS27L, RPL22L1, RPLP0, RPLP1, MRPL36, RPL10, FAU, RPL11, RPL12, MRPL32, RPS27A, RPL36AL, MRPL52, RPL35A, MRPL51, MRPL50, MRTO4, RPS18, MRPS18C, RPS19, MRPS18B, RPS16, RPS17, WDR89, RPS14, RPS15, RPS12, RPS13, MRPL47, RPS10, RPS11, MRPL45, UBA52, GM8580, MRPS16, MRPS15, GM13253, MRPS14, MRPS12, MRPS11, RPS25, RPS26, …	2045	177	17854	5.6724	7.45184e-61	2.48395e-61	2.02486e-60
GOTERM_CC_FAT	GO:0005840~ribosome	120	5.45455	2.03382e-63	MRPS36, RPL18, MRPS35, RPL17, RPL36A, MRPL42, RPL19, RPL14, RPL13, RPL15, RPLP2, RPS27L, RPL22L1, RPLP0, RPLP1, MRPL36, RPL10, FAU, RPL11, RPL12, MRPL32, RPS27A, RPL36AL, MRPL52, RPL35A, MRPL51, MRPL50, MRTO4, RSL1D1, RPS18, MRPS18C, RPS19, MRPS18B, RPS16, RPS17, WDR89, RPS14, RPS15, RPS12, RPS13, RPS10, MRPL47, RPS11, MRPL45, UBA52, GM8580, MRPS16, MRPS15, GM13253, MRPS14, MRPS12, MRPS11, RPS25,…	1452	192	12504	5.38223	1.11453e-60	5.57267e-61	2.96652e-60
GOTERM_BP_FAT	GO:0006412~translation	153	6.95455	3.1601e-59	EIF6, RPL18, RPL17, RPL36A, RPL19, PSTK, RPL14, RPL13, RPL15, EIF5A, RPLP2, RPS27L, RPL22L1, RPLP0, RPLP1, MRPL36, RPL10, FAU, RPL11, EIF1, RPL12, MRPL32, EIF2B3, RPS27A, RPL36AL, EIF2B5, MRPL52, RPL35A, MRPL51, DARS, RSL1D1, RPS18, RPS19, MRPS18C, MRPS18B, RPS16, RPS17, RPS14, EIF2S1, RARS, WDR89, EIF2S2, RPS15, HARS, RPS12, RPS13, MRPL47, PELO, YARS2, RPS11, EEFSEC, UBA52, GM8580, MRPS16, MRPS1…	1584	319	13588	4.11435	9.83422e-56	9.83422e-56	5.71353e-56
KEGG_PATHWAY	mmu03010:Ribosome	76	3.45455	2.18573e-54	RPL18, RPL17, RPL36A, RPL19, RPL14, RPL13, RPL15, RPLP2, RPS27L, RPL22L1, RPS2, RPS3, RPS3A, GM5148, RPLP0, RPLP1, FAU, RPL10, RPL11, RPL12, RPS27A, RPL36AL, RPL35A, RPS4X, RPS18, RPS19, RPS16, RPL41, RPS17, WDR89, RPS14, RPS15, RPS12, RPS13, RPS10, RPS11, UBB, UBA52, GM8580, GM13253, RPL27A, RPL35, RPL36, RPS15A, RPL37, RPL38, RPL39, RPS25, RPS26, RPL30, RPS27, RPS28, RPS29, RPL7, RPL32, RPL6, R…	728	89	5738	6.73058	3.80317e-52	3.80317e-52	2.67702e-51
GOTERM_MF_FAT	GO:0005198~structural molecule activity	127	5.77273	1.03538e-23	RPL18, RPL17, RPL36A, RPL19, RPL14, VAPA, RPL13, RPL15, NUP62CL, RPLP2, RPS27L, RPL22L1, VCL, ACTG1, RPLP0, RPLP1, MRPL36, RPL10, FAU, RPL11, RPL12, MRPL32, RPS27A, RPL36AL, MRPL52, RPL35A, MRPL51, RSL1D1, RPS18, MRPS18C, KRT18, RPS19, MRPS18B, RPS16, RPS17, WDR89, RPS14, RPS15, RPS12, COL1A2, RPS13, MRPL47, LAMC1, RPS11, UBA52, MYL6, GM8580, MRPS16, MRPS15, GM13253, MRPS14, MRPS12, MRPS11, AKAP1…	1489	450	13288	2.51858	1.12856e-20	3.76188e-21	1.65383e-20
Annotation Cluster 2	Enrichment Score: 32.31705524114273
Category	Term	Count	%	PValue	Genes	List Total	Pop Hits	Pop Total	Fold Enrichment	Bonferroni	Benjamini	FDR
GOTERM_CC_FAT	GO:0031974~membrane-enclosed lumen	308	14	1.48891e-48	RPP38, PNMA2, SURF6, SRP68, REST, WDR74, DNAJB11, MAK16, RBM8A, D19BWG1357E, MRPL36, LSM4, DHX33, RPL12, PDHA1, MRPL32, KRR1, MRPL52, MRPL51, RARG, RREB1, EMG1, BYSL, TAF4B, MED11, ISG20L2, MED10, RPS19, NOP2, TIMM8A1, TXNDC5, MAPK3, PRKRIP1, MRPL47, TGFB1I1, SRP72, SIP1, MYBBP1A, PRODH, ALDOA, CPSF3L, SDAD1, TDRD7, NHP2L1, NOC3L, AHCTF1, ZNRD1, CHCHD4, BOP1, PIN4, CALR, SERPINH1, PPAN, WDR55, FR…	1452	1174	12504	2.25925	8.15922e-46	2.71974e-46	2.17171e-45
GOTERM_CC_FAT	GO:0005730~nucleolus	135	6.13636	1.93516e-46	RPP38, PNMA2, SURF6, SRP68, SRP19, WDR74, EBNA1BP2, IMP3, MAK16, D19BWG1357E, DHX33, DDX21, RPL12, IMP4, GNL3, KRR1, EMG1, BYSL, RRP8, RRP9, ISG20L2, ZFP593, MRTO4, RSL1D1, RCL1, PA2G4, RPS19, NOP2, PRKRIP1, SRP72, MYBBP1A, SDAD1, NHP2L1, 2610029G23RIK, NOC3L, ZNRD1, BOP1, PIN4, LIN28A, PPAN, DDX47, WDR55, RPL6, BRIX1, EIF3L, RPL5, NAT10, TRP53, NKRF, MYO1C, NOC4L, TSR1, NOP10, RPF1, NOP14, NOP16…	1452	310	12504	3.7502	1.06047e-43	2.65117e-44	2.82261e-43
GOTERM_CC_FAT	GO:0043233~organelle lumen	295	13.4091	2.45058e-45	RPP38, PNMA2, SURF6, SRP68, REST, WDR74, DNAJB11, MAK16, RBM8A, D19BWG1357E, MRPL36, LSM4, DHX33, RPL12, PDHA1, MRPL32, KRR1, MRPL52, MRPL51, RARG, RREB1, EMG1, BYSL, TAF4B, MED11, ISG20L2, MED10, RPS19, NOP2, TXNDC5, MAPK3, PRKRIP1, MRPL47, TGFB1I1, SRP72, SIP1, MYBBP1A, PRODH, ALDOA, CPSF3L, SDAD1, TDRD7, NHP2L1, NOC3L, AHCTF1, ZNRD1, BOP1, PIN4, CALR, SERPINH1, PPAN, WDR55, FRG1, BRIX1, ALDH4A…	1452	1136	12504	2.23628	1.34292e-42	2.68584e-43	3.5744e-42
GOTERM_CC_FAT	GO:0070013~intracellular organelle lumen	294	13.3636	4.24665e-45	RPP38, PNMA2, SURF6, SRP68, REST, WDR74, DNAJB11, MAK16, RBM8A, D19BWG1357E, MRPL36, LSM4, DHX33, RPL12, PDHA1, MRPL32, KRR1, MRPL52, MRPL51, RARG, RREB1, EMG1, BYSL, TAF4B, MED11, ISG20L2, MED10, RPS19, NOP2, TXNDC5, MAPK3, PRKRIP1, MRPL47, TGFB1I1, SRP72, SIP1, MYBBP1A, PRODH, CPSF3L, SDAD1, TDRD7, NHP2L1, NOC3L, AHCTF1, ZNRD1, BOP1, PIN4, CALR, SERPINH1, PPAN, WDR55, FRG1, BRIX1, ALDH4A1, NAT1…	1452	1133	12504	2.2346	2.32716e-42	3.87861e-43	6.19413e-42
GOTERM_CC_FAT	GO:0031981~nuclear lumen	228	10.3636	5.25898e-34	RPP38, PNMA2, SURF6, SRP68, REST, WDR74, MAK16, RBM8A, D19BWG1357E, DHX33, LSM4, RPL12, KRR1, RARG, EMG1, RREB1, TAF4B, BYSL, MED11, ISG20L2, MED10, RPS19, NOP2, MAPK3, PRKRIP1, TGFB1I1, SRP72, SIP1, MYBBP1A, CPSF3L, SDAD1, NHP2L1, NOC3L, AHCTF1, ZNRD1, BOP1, PIN4, PPAN, WDR55, FRG1, BRIX1, NAT10, NKRF, NOC4L, SRA1, RYBP, NOP10, RPF1, NOP14, ETS1, NOP16, UTP20, RPP40, TAF1C, UTP18, GAR1, ZMAT3, T…	1452	883	12504	2.2236	2.88192e-31	4.11703e-32	7.67072e-31
GOTERM_CC_FAT	GO:0005654~nucleoplasm	112	5.09091	2.52704e-07	SURF6, LMO4, REST, DPY30, GTF2E2, RBM8A, LSM4, GNL3, MLL2, RARG, RREB1, MAGOH, TAF4B, MED11, MED10, AHR, ELL2, SIX1, MAPK3, MGA, SIP1, LRPPRC, CPSF3L, NOC3L, BOP1, MEIS1, FRG1, SNF8, EIF3L, MYO1C, WDR5, SRA1, TAF7, RYBP, SAP18, TEAD2, RNPS1, NOP10, ATF4, PPIH, SALL4, PSMC5, EAF1, HDAC1, ETS1, GTF2F2, TAF1C, E2F4, E2F5, GAR1, BNIP3, PAX5, PAX3, PAX2, RPS19BP1, PCGF2, PLRG1, DKC1, AEN, PAX7, PAX8, …	1452	599	12504	1.61018	0.000138472	4.61605e-06	0.000368592
GOTERM_CC_FAT	GO:0044451~nucleoplasm part	88	4	0.000151425	TAF1C, E2F4, E2F5, GAR1, SURF6, LMO4, PAX5, PAX3, REST, PAX2, DPY30, PCGF2, GTF2E2, PLRG1, DKC1, RBM8A, PAX7, PAX8, MYC, ALX1, MLL2, RBBP4, RARG, RREB1, TAF4B, MAGOH, GTF2H3, MED11, CDK7, PRPF4, AHR, MED10, NRIP1, ELL2, TAF10, MED8, SIX1, MGA, RUVBL1, SIP1, NHP2, C1D, CPSF3L, ING5, POLR2H, SUPT3H, POLR2G, POLR2F, POLR2E, POLR2L, POLR2J, POLR2I, NOC3L, NUFIP1, NFYB, WBP11, ZBTB16, POLR2D, TCF7L2, …	1452	513	12504	1.47723	0.0796373	0.00197394	0.220641
Annotation Cluster 3	Enrichment Score: 24.008041044488213
Category	Term	Count	%	PValue	Genes	List Total	Pop Hits	Pop Total	Fold Enrichment	Bonferroni	Benjamini	FDR
GOTERM_BP_FAT	GO:0042254~ribosome biogenesis	68	3.09091	1.68614e-34	EIF6, NAF1, UTP18, GAR1, SURF6, LSM6, UTP15, DCAF13, EBNA1BP2, IMP3, SBDS, WDR36, DKC1, RRN3, RRP1B, RPLP0, IMP4, KRR1, EMG1, EXOSC7, EXOSC4, BYSL, NIP7, EXOSC5, EXOSC2, EXOSC3, RRP8, RRP9, ISG20L2, EXOSC1, MRTO4, RCL1, PA2G4, NOP2, RPS14, IPO4, ZNHIT6, NHP2, C1D, SDAD1, NHP2L1, NOB1, WBP11, BOP1, BMS1, FCF1, MINA, MRPL10, UTP11L, WDR55, FRG1, BRIX1, WDR12, AATF, RSL24D1, NMD3, TSR1, RPL24, RPS6,…	1584	112	13588	5.20824	5.24727e-31	2.62364e-31	3.04858e-31
GOTERM_BP_FAT	GO:0022613~ribonucleoprotein complex biogenesis	75	3.40909	7.54429e-34	EIF6, NAF1, UTP18, GAR1, SURF6, LSM6, UTP15, DCAF13, EBNA1BP2, IMP3, SBDS, WDR36, PRMT7, RRP1B, DKC1, RRN3, RPLP0, PRMT5, LSM2, IMP4, KRR1, EMG1, EXOSC7, EXOSC4, BYSL, NIP7, EXOSC5, EXOSC2, EXOSC3, RRP8, RRP9, ISG20L2, EXOSC1, SMN1, MRTO4, RCL1, PA2G4, NOP2, RPS14, IPO4, SIP1, ZNHIT6, NHP2, C1D, SDAD1, NHP2L1, NOB1, WBP11, BOP1, BMS1, FCF1, MINA, EIF3D, MRPL10, UTP11L, WDR55, FRG1, BRIX1, WDR12, …	1584	137	13588	4.69614	2.34778e-30	7.82594e-31	1.36403e-30
GOTERM_BP_FAT	GO:0034660~ncRNA metabolic process	80	3.63636	4.09828e-24	RPP38, NAF1, NARS, UTP18, GAR1, LSM6, UTP15, RG9MTD1, PUS7L, DCAF13, EBNA1BP2, IMP3, WDR36, RRP1B, DKC1, TRMT6, TRMT5, IMP4, TSEN15, RPP25, KRR1, DARS, EMG1, EXOSC7, EXOSC4, EXOSC5, EXOSC2, EXOSC3, RRP8, RRP9, EXOSC1, TRMT61A, RCL1, PA2G4, NOP2, TRMT11, RARS, RPS14, HARS, FARSB, YARS2, NHP2, C1D, CPSF3L, HSD17B10, PUS3, PUS10, NOB1, WBP11, BOP1, QTRT1, VARS, LIN28A, LIN28B, FCF1, KARS, UTP11L, WD…	1584	202	13588	3.39734	1.27539e-20	2.55077e-21	7.40979e-21
GOTERM_BP_FAT	GO:0034470~ncRNA processing	69	3.13636	9.74848e-24	RPP38, NAF1, UTP18, GAR1, LSM6, UTP15, RG9MTD1, PUS7L, DCAF13, EBNA1BP2, IMP3, WDR36, DKC1, RRP1B, TRMT6, TRMT5, IMP4, TSEN15, RPP25, KRR1, EMG1, EXOSC7, EXOSC4, EXOSC5, EXOSC2, EXOSC3, RRP8, RRP9, EXOSC1, TRMT61A, RCL1, PA2G4, NOP2, TRMT11, RPS14, NHP2, C1D, CPSF3L, HSD17B10, PUS3, PUS10, NOB1, WBP11, BOP1, QTRT1, LIN28A, LIN28B, FCF1, UTP11L, WDR55, FRG1, TYW1, QTRTD1, ADAT2, THG1L, WDR12, NSUN…	1584	158	13588	3.74621	3.03373e-20	5.05621e-21	1.76255e-20
GOTERM_BP_FAT	GO:0006364~rRNA processing	44	2	6.72113e-22	NAF1, GAR1, UTP18, LSM6, NOB1, UTP15, WBP11, BOP1, FCF1, EBNA1BP2, DCAF13, UTP11L, IMP3, WDR36, WDR55, RRP1B, DKC1, FRG1, WDR12, IMP4, KRR1, EXOSC7, EMG1, EXOSC4, EXOSC5, EXOSC2, EXOSC3, RRP8, EXOSC1, RRP9, RPS6, NOP10, RPF1, FBL, NOP14, DIS3, RCL1, PA2G4, NOP2, RPS14, WDR3, PES1, NHP2, C1D	1584	74	13588	5.1006	2.09162e-18	2.98802e-19	1.2152e-18
GOTERM_BP_FAT	GO:0016072~rRNA metabolic process	44	2	1.39575e-21	NAF1, GAR1, UTP18, LSM6, NOB1, UTP15, WBP11, BOP1, FCF1, EBNA1BP2, DCAF13, UTP11L, IMP3, WDR36, WDR55, RRP1B, DKC1, FRG1, WDR12, IMP4, KRR1, EXOSC7, EMG1, EXOSC4, EXOSC5, EXOSC2, EXOSC3, RRP8, EXOSC1, RRP9, RPS6, NOP10, RPF1, FBL, NOP14, DIS3, RCL1, PA2G4, NOP2, RPS14, WDR3, PES1, NHP2, C1D	1584	75	13588	5.03259	4.34359e-18	5.42948e-19	2.52356e-18
SP_PIR_KEYWORDS	ribosome biogenesis	32	1.45455	1.68478e-19	NAF1, SDAD1, GAR1, BOP1, FCF1, MINA, EBNA1BP2, DCAF13, IMP3, SBDS, DKC1, FRG1, BRIX1, WDR12, RSL24D1, IMP4, KRR1, TSR1, EMG1, NIP7, BYSL, ISG20L2, NOP10, RPF1, MRTO4, NOP14, RCL1, NOP58, RRS1, PES1, ZNHIT6, NHP2	2045	45	17854	6.2084	9.01356e-17	1.00151e-17	2.44922e-16
SP_PIR_KEYWORDS	rrna processing	36	1.63636	1.07356e-18	NAF1, GAR1, UTP18, LSM6, UTP15, WBP11, BOP1, FCF1, DCAF13, UTP11L, IMP3, WDR55, DKC1, FRG1, WDR12, IMP4, KRR1, EXOSC7, EMG1, EXOSC4, EXOSC5, EXOSC2, EXOSC3, RRP8, EXOSC1, RRP9, SIRT1, NOP10, RPF1, FBL, NOP14, DIS3, PA2G4, PES1, NHP2, C1D	2045	59	17854	5.32712	5.74354e-16	5.2214e-17	1.56067e-15
Annotation Cluster 4	Enrichment Score: 11.87932550738141
Category	Term	Count	%	PValue	Genes	List Total	Pop Hits	Pop Total	Fold Enrichment	Bonferroni	Benjamini	FDR
GOTERM_BP_FAT	GO:0006396~RNA processing	138	6.27273	2.48301e-29	RPP38, RALY, NAF1, NCBP1, LSM6, SNRPD3, LSM7, SNRPD1, SNRPD2, PUS7L, EBNA1BP2, IMP3, RBM8A, LSM5, U2AF1, LSM4, LSM3, LSM2, LSM1, IMP4, PABPN1, RPP25, SNRPA1, KRR1, EMG1, MAGOH, EFTUD2, PTBP1, RRP8, RRP9, RSL1D1, RCL1, DDX39, PA2G4, NOP2, TRMT11, RPS14, SNRPB, SNRPA, SIP1, SNRPF, SNRPE, SNRPG, CPSF3L, HSD17B10, PUS3, NHP2L1, SNRPB2, PNPT1, BOP1, LIN28A, NAA38, LIN28B, WDR55, FRG1, QTRTD1, PRKRA, R…	1584	437	13588	2.70893	7.72712e-26	1.93178e-26	4.48934e-26
GOTERM_BP_FAT	GO:0008380~RNA splicing	61	2.77273	2.20132e-12	RALY, NCBP1, LSM6, SNRPD3, CWC15, LSM7, SNRPD1, SNRPD2, PRMT7, PLRG1, RBM8A, PRMT5, LSM5, U2AF1, MAGOHB, LSM4, LSM3, LSM2, LSM1, SNRPA1, EFTUD2, MAGOH, PTBP1, PRPF4, SMN1, SRPK1, DDX39, SNRPB, ESRP1, SNRPA, THOC5, SIP1, SNRPF, THOC3, SNRPE, SNRPG, PRPF38A, NHP2L1, 0610009D07RIK, SNRPB2, WBP11, SF3B5, NAA38, SF3B4, PRPF19, FRG1, USP39, GEMIN6, RBM28, GEMIN5, TSEN34, BCAS2, TXNL4B, RNPS1, SF3A3, PP…	1584	201	13588	2.60336	6.8506e-09	7.61178e-10	3.98009e-09
SP_PIR_KEYWORDS	mrna splicing	58	2.63636	4.32896e-12	RALY, NCBP1, LSM6, SNRPD3, CWC15, LSM7, SNRPD1, SNRPD2, PLRG1, RBM8A, LSM5, U2AF1, MAGOHB, LSM4, LSM3, LSM2, LSM1, SNRPA1, EFTUD2, MAGOH, PTBP1, PRPF4, SMN1, SRPK1, DDX39, SNRPB, ESRP1, SNRPA, THOC5, SIP1, SNRPF, THOC3, SNRPE, SNRPG, PRPF38A, NHP2L1, 0610009D07RIK, SNRPB2, WBP11, SF3B5, NAA38, SF3B4, PRPF19, FRG1, USP39, GEMIN6, RBM28, GEMIN5, BCAS2, TXNL4B, RNPS1, SF3A3, PPIH, SYF2, PHF5A, SNRNP…	2045	191	17854	2.65117	2.31601e-09	1.78154e-10	6.2932e-09
KEGG_PATHWAY	mmu03040:Spliceosome	45	2.04545	3.66577e-11	NCBP1, CCDC12, NHP2L1, LSM6, SNRPD3, 0610009D07RIK, CWC15, SNRPB2, ZMAT2, LSM7, SNRPD1, SNRPD2, WBP11, SF3B5, NAA38, SF3B4, PRPF19, PLRG1, RBM8A, PCBP1, USP39, LSM5, PQBP1, U2AF1, LSM4, LSM3, LSM2, BCAS2, SNRPA1, MAGOH, EFTUD2, PRPF4, SF3A3, PPIH, SNRPB, SYF2, SNRPA, SNRPC, PHF5A, SNRPF, SNRNP27, THOC3, SNRPE, PRPF38A, SNRPG	728	124	5738	2.86036	6.37844e-09	1.59461e-09	4.48973e-08
SP_PIR_KEYWORDS	mrna processing	63	2.86364	4.07524e-10	RALY, NCBP1, LSM6, SNRPD3, CWC15, LSM7, SNRPD1, SNRPD2, PLRG1, RBM8A, LSM5, U2AF1, MAGOHB, LSM4, LSM3, LSM2, LSM1, TSEN15, PABPN1, SNRPA1, EFTUD2, MAGOH, PTBP1, PRPF4, SRPK1, SMN1, DDX39, SNRPB, ESRP1, SNRPA, CPSF4, THOC5, SIP1, SNRPF, THOC3, SNRPE, SNRPG, SSU72, PRPF38A, NHP2L1, 0610009D07RIK, SNRPB2, WBP11, SF3B5, NAA38, SF3B4, PRPF19, FRG1, USP39, GEMIN6, RBM28, GEMIN5, TSEN34, BCAS2, TXNL4B, …	2045	240	17854	2.29177	2.18026e-07	1.55733e-08	5.92433e-07
GOTERM_BP_FAT	GO:0016071~mRNA metabolic process	74	3.36364	6.11176e-10	RALY, NCBP1, LSM6, SNRPD3, CWC15, LSM7, SNRPD1, SNRPD2, DCPS, PARN, PRMT7, PLRG1, DNAJB11, RBM8A, PCBP1, PRMT5, U2AF1, LSM5, MAGOHB, LSM4, LSM3, LSM2, LSM1, TSEN15, PABPN1, SNRPA1, EFTUD2, MAGOH, PTBP1, PRPF4, SRPK1, SMN1, DDX39, ROD1, ESRP1, SNRPB, SNRPA, THOC5, CPSF4, SIP1, SNRPF, THOC3, SNRPE, SNRPG, SSU72, PRPF38A, NHP2L1, 0610009D07RIK, PNPT1, SNRPB2, WBP11, SF3B5, NAA38, SF3B4, ZFP36L1, PRP…	1584	302	13588	2.10196	1.90198e-06	1.90198e-07	1.10502e-06
GOTERM_BP_FAT	GO:0006397~mRNA processing	67	3.04545	6.6069e-10	RALY, NCBP1, LSM6, SNRPD3, CWC15, LSM7, SNRPD1, SNRPD2, PRMT7, PLRG1, RBM8A, PCBP1, PRMT5, LSM5, U2AF1, MAGOHB, LSM4, LSM3, LSM2, LSM1, TSEN15, PABPN1, SNRPA1, EFTUD2, MAGOH, PTBP1, PRPF4, SRPK1, SMN1, DDX39, ROD1, SNRPB, ESRP1, SNRPA, CPSF4, THOC5, SIP1, SNRPF, THOC3, SNRPE, SNRPG, SSU72, PRPF38A, NHP2L1, 0610009D07RIK, SNRPB2, WBP11, SF3B5, NAA38, SF3B4, PRPF19, FRG1, USP39, GEMIN6, RBM28, GEMI…	1584	262	13588	2.19368	2.05606e-06	1.86915e-07	1.19454e-06
GOTERM_CC_FAT	GO:0005681~spliceosome	41	1.86364	7.15389e-10	RALY, NHP2L1, SNRPD3, CWC15, SNRPB2, SNRPD1, SNRPD2, SF3B5, SF3B4, PRPF19, PLRG1, FRG1, RBM8A, U2AF1, LSM4, LSM3, LSM2, GEMIN6, RBM28, GEMIN5, BCAS2, SNRPA1, TXNL4B, MAGOH, EFTUD2, PRPF4, SMN1, SF3A3, PPIH, SNRPB, SYF2, SNRPA, RNPC3, PHF5A, SIP1, SNRPF, SNRPE, SNRNP25, TXNL4A, PRPF38A, SNRPG	1452	124	12504	2.84737	3.92033e-07	1.78197e-08	1.04346e-06
SP_PIR_KEYWORDS	Spliceosome	36	1.63636	1.19399e-08	RALY, NHP2L1, SNRPD3, SNRPB2, SNRPD1, SNRPD2, SF3B5, SF3B4, PRPF19, PLRG1, FRG1, RBM8A, U2AF1, LSM3, LSM2, GEMIN6, RBM28, GEMIN5, BCAS2, SNRPA1, MAGOH, EFTUD2, PRPF4, SMN1, SF3A3, PPIH, SNRPB, SYF2, SNRPA, PHF5A, SIP1, SNRPF, SNRPE, SNRNP25, PRPF38A, SNRPG	2045	111	17854	2.83153	6.38783e-06	3.19393e-07	1.73575e-05
Annotation Cluster 5	Enrichment Score: 11.203140807954174
Category	Term	Count	%	PValue	Genes	List Total	Pop Hits	Pop Total	Fold Enrichment	Bonferroni	Benjamini	FDR
GOTERM_CC_FAT	GO:0005739~mitochondrion	272	12.3636	1.68351e-23	LDHA, MRPL42, FASTKD2, AURKAIP1, RNASEH1, GFER, STOML2, RAB1B, GLDC, HRSP12, MRPL36, PDHA1, MRPL32, CRY1, GNG5, HIGD1A, MRPL52, MRPL51, NUDT19, MRPL50, SUCLG2, BCL2L11, NME2, NME3, TIMM8A1, NME1, RPS14, RARS, ATPIF1, MRPL47, MRPL45, EEFSEC, GM12070, PRODH, MDH1, HSD17B10, GM13253, TDRD7, TXN2, CHCHD1, CHCHD2, TXN1, CHCHD4, CHCHD7, COX6B1, DIABLO, ALDH4A1, GCSH, FAM162A, NTHL1, RARS2, PHB, MAOA, M…	1452	1322	12504	1.77182	9.22562e-21	9.22562e-22	2.45555e-20
SP_PIR_KEYWORDS	mitochondrion	177	8.04545	3.29391e-19	MRPS36, MRPS35, GRPEL1, MRPL42, NDUFAB1, COX5A, COX5B, MTHFD1L, PDHB, GLDC, UQCR10, CISD1, UQCR11, TIMM9, MRPL36, PDHA1, HADH, MRPL32, MRPL52, MRPL51, NUDT19, MRPL50, SUCLG2, PISD, BCL2L11, COX6C, SLC25A30, SLC25A32, TIMM8A1, MRPS18C, MRPS18B, SLC25A33, ATPIF1, MRPL47, YARS2, MRPL45, LRPPRC, PRODH, HSD17B10, MRPS16, MRPS15, ME2, MRPS14, TXN2, MRPS12, MRPS11, PNPT1, COX7B, COX7C, CHCHD2, CHCHD4, M…	2045	790	17854	1.95609	1.76224e-16	1.76224e-17	4.78848e-16
GOTERM_CC_FAT	GO:0044429~mitochondrial part	129	5.86364	2.48069e-17	MRPS36, MRPS35, GRPEL1, STOML2, COX5A, COX5B, PDHB, UQCR10, CISD1, UQCR11, TIMM9, MRPL36, PDHA1, HADH, MRPL32, MRPL52, MRPL51, COX6C, SLC25A30, SLC25A32, TIMM8A1, SLC25A33, MRPL47, YARS2, MRPL45, PRODH, HSD17B10, ME2, MRPS14, TDRD7, PNPT1, COX7B, COX7C, CHCHD4, MUT, TOMM7, MTCH2, TOMM5, COX6B1, ALDH4A1, DIABLO, HSPE1, ATP5J2, RARS2, MRPS23, PHB, MAOA, MAOB, COX8A, AK2, TOMM40, MRPS21, VDAC2, VDAC…	1452	524	12504	2.12002	1.35942e-14	1.23584e-15	3.61832e-14
GOTERM_CC_FAT	GO:0031967~organelle envelope	127	5.77273	3.12396e-15	EIF6, NUP62CL, STOML2, EIF5A, COX5A, COX5B, UQCR10, CISD1, UQCR11, TIMM9, NUP37, HADH, NUP35, NUPL1, COX6C, SLC25A30, NPC1, SLC25A32, TIMM8A1, SLC25A33, MRPL45, NUP43, LRPPRC, PRODH, HSD17B10, PNPT1, COX7B, COX7C, AHCTF1, CHCHD4, TOMM7, CSE1L, MTCH2, TOMM5, BCHE, CACYBP, COX6B1, DIABLO, NUP54, ATP5J2, MYO1C, PHB, MAOA, MAOB, COX8A, AK2, TOMM40, MRPS21, VDAC2, VDAC3, VDAC1, OCIAD2, TST, USMG5, PRI…	1452	540	12504	2.02531	1.70353e-12	1.41998e-13	4.52971e-12
GOTERM_CC_FAT	GO:0031975~envelope	127	5.77273	4.33185e-15	EIF6, NUP62CL, STOML2, EIF5A, COX5A, COX5B, UQCR10, CISD1, UQCR11, TIMM9, NUP37, HADH, NUP35, NUPL1, COX6C, SLC25A30, NPC1, SLC25A32, TIMM8A1, SLC25A33, MRPL45, NUP43, LRPPRC, PRODH, HSD17B10, PNPT1, COX7B, COX7C, AHCTF1, CHCHD4, TOMM7, CSE1L, MTCH2, TOMM5, BCHE, CACYBP, COX6B1, DIABLO, NUP54, ATP5J2, MYO1C, PHB, MAOA, MAOB, COX8A, AK2, TOMM40, MRPS21, VDAC2, VDAC3, VDAC1, OCIAD2, TST, USMG5, PRI…	1452	542	12504	2.01784	2.37277e-12	1.82521e-13	6.31717e-12
KEGG_PATHWAY	mmu05016:Huntington's disease	63	2.86364	3.43895e-14	ATP5E, CLTA, AP2S1, NDUFAB1, REST, COX5A, UQCRQ, COX5B, GPX1, NDUFS6, UQCR10, UQCR11, CASP9, ATP5H, TAF4B, CYCS, NDUFC2, COX4I2, COX4I1, NDUFC1, COX6C, UQCRH, UQCRB, NDUFB3, POLR2H, POLR2G, NDUFB5, POLR2F, NDUFB6, POLR2E, POLR2L, NDUFB8, POLR2K, POLR2J, COX7B, POLR2I, COX7C, ATP5G2, COX7A2L, ATP5G1, POLR2D, TFAM, COX6B1, NDUFA4, TRP53, NDUFA5, COX7A2, NDUFA8, NDUFA6, NDUFA7, COX8A, SOD1, VDAC2, V…	728	183	5738	2.71343	5.98854e-12	2.99427e-12	4.21552e-11
KEGG_PATHWAY	mmu00190:Oxidative phosphorylation	50	2.27273	1.90682e-13	ATP5E, COX11, NDUFAB1, COX5A, UQCRQ, COX5B, NDUFS6, UQCR10, UQCR11, COX17, ATP5H, NDUFC2, COX4I2, COX4I1, NDUFC1, ATP6V1D, COX6C, ATP6V1F, NDUFA11, ATP6V1C1, UQCRH, UQCRB, NDUFB3, NDUFB5, NDUFB6, NDUFB8, COX7B, COX7C, ATP5G2, COX7A2L, ATP5G1, ATP6V1B2, ATP6V0C, ATP6V0E, COX6B1, NDUFA4, NDUFA5, ATP5J2, COX7A2, NDUFA8, NDUFA6, COX8A, NDUFA7, LHPP, NDUFA1, PPA2, PPA1, ATP6V1E1, SDHD, NDUFV2	728	130	5738	3.03149	3.31881e-11	1.10627e-11	2.33613e-10
GOTERM_CC_FAT	GO:0019866~organelle inner membrane	82	3.72727	1.03506e-12	EIF6, CYB5R3, ATP5E, COX11, TIMM17A, TIMM17B, STOML2, COX5A, COX5B, UQCRQ, NDUFS6, UQCR10, UQCR11, PARL, DNAJC11, TIMM9, SLC25A1, HADH, ATP5H, NDUFC2, COX4I2, COX4I1, NDUFC1, SIGMAR1, TIMM23, COX6C, NDUFA11, IMMP1L, SLC25A30, SLC25A32, TIMM8A1, UQCRH, SLC25A33, MRPL45, LRPPRC, PRODH, UQCRB, NDUFB3, TUFM, HSD17B10, NDUFB5, NDUFB6, NDUFB8, COX7B, COX7C, TIMM10, ATP5G1, COX7A2L, TIMM13, MTCH2, MRPL1…	1452	312	12504	2.2633	5.67213e-10	3.78142e-11	1.50974e-09
GOTERM_CC_FAT	GO:0005743~mitochondrial inner membrane	79	3.59091	1.2047e-12	CYB5R3, ATP5E, COX11, TIMM17A, TIMM17B, STOML2, COX5A, COX5B, UQCRQ, NDUFS6, UQCR10, UQCR11, PARL, DNAJC11, TIMM9, SLC25A1, HADH, ATP5H, NDUFC2, COX4I2, COX4I1, NDUFC1, TIMM23, COX6C, NDUFA11, IMMP1L, SLC25A30, SLC25A32, TIMM8A1, UQCRH, SLC25A33, MRPL45, PRODH, UQCRB, NDUFB3, TUFM, HSD17B10, NDUFB5, NDUFB6, NDUFB8, COX7B, COX7C, TIMM10, ATP5G1, COX7A2L, TIMM13, MTCH2, MRPL17, COX6B1, 1500001M20RI…	1452	296	12504	2.29836	6.60177e-10	4.12611e-11	1.75717e-09
GOTERM_CC_FAT	GO:0005740~mitochondrial envelope	95	4.31818	2.03591e-12	CYB5R3, ATP5E, COX11, TIMM17A, TIMM17B, BNIP3, STOML2, COX5A, COX5B, UQCRQ, NDUFS6, UQCR10, CISD1, UQCR11, PARL, DNAJC11, TIMM9, SLC25A1, HADH, ATP5H, COX17, TOMM34, NDUFC2, COX4I2, COX4I1, NDUFC1, TIMM23, COX6C, NDUFA11, IMMP1L, SLC25A30, SLC25A32, TIMM8A1, UQCRH, SLC25A33, TOMM20, MRPL45, PRODH, UQCRB, BID, TUFM, NDUFB3, HSD17B10, NDUFB5, NDUFB6, NDUFB8, PNPT1, COX7B, COX7C, TIMM10, ATP5G1, TIM…	1452	391	12504	2.09233	1.11569e-09	6.56287e-11	2.96959e-09
GOTERM_CC_FAT	GO:0031966~mitochondrial membrane	90	4.09091	5.6673e-12	CYB5R3, ATP5E, COX11, TIMM17A, TIMM17B, BNIP3, STOML2, COX5A, COX5B, UQCRQ, NDUFS6, UQCR10, CISD1, UQCR11, PARL, DNAJC11, TIMM9, SLC25A1, HADH, ATP5H, TOMM34, NDUFC2, COX4I2, COX4I1, NDUFC1, TIMM23, COX6C, NDUFA11, IMMP1L, SLC25A30, SLC25A32, TIMM8A1, UQCRH, SLC25A33, TOMM20, MRPL45, PRODH, UQCRB, BID, NDUFB3, TUFM, HSD17B10, NDUFB5, NDUFB6, NDUFB8, COX7B, COX7C, TIMM10, ATP5G1, TIMM13, COX7A2L, …	1452	368	12504	2.10609	3.10571e-09	1.63458e-10	8.26637e-09
GOTERM_CC_FAT	GO:0031090~organelle membrane	151	6.86364	1.59426e-09	EIF6, CHMP6, UBQLN4, STOML2, COX5A, SLC35A1, SLC35A2, COX5B, SLC35A4, UQCR10, DAB2, CISD1, UQCR11, ST3GAL6, TIMM9, RPN1, RPN2, HADH, DNAJC3, DDOST, SCAMP5, BCAP31, COX6C, SLC25A30, SLC25A32, 1110002B05RIK, TIMM8A1, SLC25A33, MRPL45, LRPPRC, PRODH, ARL6IP1, HSD17B10, CLCN3, DERL1, CNIH, GRB2, COX7B, COPZ1, COX7C, ST8SIA3, PEX5L, ATP6V0C, ECE2, TOMM7, MTCH2, TOMM5, COX6B1, TMED10, ACER3, ATP5J2, PH…	1452	809	12504	1.60735	8.73656e-07	3.7985e-08	2.32538e-06
KEGG_PATHWAY	mmu05012:Parkinson's disease	44	2	1.80478e-09	NDUFB3, ATP5E, NDUFB5, NDUFB6, NDUFB8, COX7B, NDUFAB1, COX7C, ATP5G2, COX7A2L, ATP5G1, COX5A, UQCRQ, COX5B, NDUFS6, UQCR10, UQCR11, CASP9, COX6B1, ATP5H, RPS27A, NDUFA4, NDUFA5, COX7A2, NDUFA8, NDUFA6, NDUFA7, CYCS, COX8A, NDUFC2, COX4I2, COX4I1, NDUFC1, VDAC2, VDAC3, NDUFA1, PARK7, COX6C, VDAC1, UQCRH, PPID, NDUFV2, SDHD, UBB, UBA52, UQCRB	728	133	5738	2.60754	3.14031e-07	5.23386e-08	2.21044e-06
SP_PIR_KEYWORDS	mitochondrion inner membrane	51	2.31818	2.60986e-09	ATP5E, COX11, TIMM17A, TIMM17B, COX5A, UQCRQ, COX5B, NDUFS6, UQCR10, UQCR11, PARL, TIMM9, ATP5H, NDUFC2, COX4I2, COX4I1, NDUFC1, TIMM23, COX6C, NDUFA11, SLC25A30, IMMP1L, SLC25A32, TIMM8A1, SLC25A33, UQCRH, UQCRB, NDUFB3, NDUFB5, NDUFB6, NDUFB8, COX7B, COX7C, TIMM10, COX7A2L, TIMM13, MTCH2, NDUFA4, NDUFA5, ATP5J2, COX7A2, PHB, NDUFA6, NDUFA7, COX8A, NDUFA1, UCP2, PHB2, NDUFV2, SDHD, SLC25A15	2045	183	17854	2.43311	1.39628e-06	7.34882e-08	3.79405e-06
GOTERM_CC_FAT	GO:0070469~respiratory chain	26	1.18182	2.1529e-08	NDUFB3, NDUFB5, NDUFB6, NDUFB8, COX7B, NDUFAB1, COX7A2L, UQCRQ, NDUFS6, UQCR10, UQCR11, NDUFA4, NDUFA5, COX7A2, NDUFA8, NDUFA6, NDUFA7, CYCS, NDUFC2, COX4I2, NDUFC1, NDUFA1, NDUFA11, UQCRH, NDUFV2, UQCRB	1452	65	12504	3.44463	1.17978e-05	4.36959e-07	3.14021e-05
SP_PIR_KEYWORDS	respiratory chain	25	1.13636	2.82066e-08	NDUFB3, NDUFB5, NDUFB6, NDUFB8, NDUFAB1, COX5A, UQCRQ, COX5B, NDUFS6, UQCR10, UQCR11, NDUFA4, NDUFA5, NDUFA8, NDUFA6, NDUFA7, CYCS, NDUFC2, COX4I1, NDUFC1, NDUFA1, NDUFA11, UQCRH, NDUFV2, UQCRB	2045	62	17854	3.52039	1.50904e-05	6.85934e-07	4.1005e-05
GOTERM_BP_FAT	GO:0006091~generation of precursor metabolites and energy	62	2.81818	5.92476e-08	PTGES3, ATP5E, LDHA, PGAM1, NDUFAB1, UQCRQ, PDHB, NDUFS6, UQCR10, UQCR11, PDHA1, SUCLA2, ATP5H, PFKL, SUCLG2, GM5506, CYCS, NDUFC2, NDUFC1, ATP6V1D, NDUFA11, ATP6V1F, ATP6V1C1, UQCRH, PKM2, GM12070, MYBBP1A, STEAP1, MDH1, UQCRB, ALDOA, NDUFB3, NDUFB5, NDUFB6, NDUFB8, ADPGK, TXN2, HK2, ATP5G2, TXN1, ATP5G1, ATP6V1B2, GPI1, ATP6V0C, TPI1, ATP6V0E, ENO3, GAPDH, ETFB, GLRX, ENO1, NDUFA4, NDUFA5, NDUF…	1584	261	13588	2.03775	0.000184362	1.53648e-05	0.000107121
SP_PIR_KEYWORDS	electron transport	29	1.31818	4.71678e-06	NDUFB3, NDUFB5, NDUFB6, NDUFB8, TXN2, NDUFAB1, TXN1, UQCRQ, NDUFS6, UQCR10, UQCR11, ETFB, GLRX, NDUFA4, NDUFA5, NDUFA8, NDUFA6, CYCS, NDUFA7, NDUFC2, NDUFC1, NDUFA1, NDUFA11, FRRS1, UQCRH, NDUFV2, SDHD, STEAP1, UQCRB	2045	100	17854	2.53186	0.0025203	8.41126e-05	0.00685674
KEGG_PATHWAY	mmu05010:Alzheimer's disease	46	2.09091	4.74727e-06	NDUFB3, BID, HSD17B10, ATP5E, NDUFB5, NDUFB6, NDUFB8, COX7B, NDUFAB1, COX7C, ATP5G2, COX7A2L, ATP5G1, COX5A, UQCRQ, COX5B, NDUFS6, UQCR10, UQCR11, CASP9, APOE, COX6B1, GAPDH, ATP5H, NDUFA4, NDUFA5, COX7A2, NDUFA8, NDUFA6, NDUFA7, CYCS, COX8A, NDUFC2, COX4I2, COX4I1, NDUFC1, NDUFA1, COX6C, MAPK1, LRP1, PSEN1, UQCRH, NDUFV2, MAPK3, SDHD, GM12070, UQCRB	728	182	5738	1.99212	0.000825685	9.17765e-05	0.00581416
GOTERM_BP_FAT	GO:0022900~electron transport chain	31	1.40909	8.14424e-06	NDUFB3, NDUFB5, NDUFB6, NDUFB8, TXN2, NDUFAB1, TXN1, UQCRQ, NDUFS6, UQCR10, UQCR11, ETFB, GLRX, NDUFA4, NDUFA5, NDUFA8, NDUFA6, CYCS, NDUFA7, NDUFC2, NDUFC1, NDUFA1, NDUFA11, SOD2, FRRS1, UQCRH, NDUFV2, SDHD, STEAP1, MYBBP1A, UQCRB	1584	112	13588	2.37435	0.0250265	0.00133306	0.0147239
Annotation Cluster 6	Enrichment Score: 11.181845952864611
Category	Term	Count	%	PValue	Genes	List Total	Pop Hits	Pop Total	Fold Enrichment	Bonferroni	Benjamini	FDR
SP_PIR_KEYWORDS	mitochondrion	177	8.04545	3.29391e-19	MRPS36, MRPS35, GRPEL1, MRPL42, NDUFAB1, COX5A, COX5B, MTHFD1L, PDHB, GLDC, UQCR10, CISD1, UQCR11, TIMM9, MRPL36, PDHA1, HADH, MRPL32, MRPL52, MRPL51, NUDT19, MRPL50, SUCLG2, PISD, BCL2L11, COX6C, SLC25A30, SLC25A32, TIMM8A1, MRPS18C, MRPS18B, SLC25A33, ATPIF1, MRPL47, YARS2, MRPL45, LRPPRC, PRODH, HSD17B10, MRPS16, MRPS15, ME2, MRPS14, TXN2, MRPS12, MRPS11, PNPT1, COX7B, COX7C, CHCHD2, CHCHD4, M…	2045	790	17854	1.95609	1.76224e-16	1.76224e-17	4.78848e-16
SP_PIR_KEYWORDS	transit peptide	97	4.40909	2.01225e-09	MRPS35, MRPL42, GRPEL1, NDUFAB1, COX5A, COX5B, PDHB, MTHFD1L, GLDC, MRPL36, PDHA1, MRPL32, HADH, MRPL52, MRPL51, NUDT19, SUCLG2, MRPS18C, MRPS18B, MRPL47, ATPIF1, YARS2, MRPL45, LRPPRC, PRODH, MRPS16, ME2, MRPS15, TXN2, MRPS12, COX7B, PNPT1, MRPS11, COX7C, CHCHD2, MUT, GCSH, ALDH4A1, DIABLO, MRPS26, MRPS28, RARS2, COX8A, PPA2, PEO1, PTCD3, NDUFV2, HSPD1, FPGS, COX11, AMT, RG9MTD1, ACOT9, NDUFS6, …	2045	457	17854	1.8531	1.07655e-06	6.33268e-08	2.92529e-06
UP_SEQ_FEATURE	transit peptide:Mitochondrion	95	4.31818	4.29603e-07	MRPS35, MRPL42, COX11, GRPEL1, AMT, NDUFAB1, RG9MTD1, COX5A, COX5B, MTHFD1L, PDHB, GLDC, ACOT9, NDUFS6, PARL, MRPL36, PDHA1, HADH, MRPL32, SUCLA2, MRPL52, MRPL1, MRPL51, NUDT19, SSBP1, SUCLG2, COX4I2, MRPL9, COX4I1, MRPS7, DECR1, DGUOK, NDUFC1, TRAP1, MRPS18C, MRPS18B, C1QBP, UQCRH, ATPIF1, MRPL47, YARS2, ATPAF1, MRPL45, LRPPRC, PRODH, TUFM, NDUFB5, MRPS16, BCAT2, ME2, MRPS15, TXN2, NDUFB8, MRPS1…	2029	449	16021	1.67065	0.00181257	0.00181257	0.000803018
Annotation Cluster 7	Enrichment Score: 10.064892148473502
Category	Term	Count	%	PValue	Genes	List Total	Pop Hits	Pop Total	Fold Enrichment	Bonferroni	Benjamini	FDR
SMART	SM00651:Sm	15	0.681818	1.86957e-11	SNRPD3, LSM6, LSM7, SNRPD1, SNRPD2, NAA38, LSM5, SNRPB, LSM4, LSM3, LSM2, LSM1, SNRPF, SNRPE, SNRPG	913	18	9131	8.33425	6.41263e-09	6.41263e-09	2.54929e-08
INTERPRO	IPR006649:Like-Sm ribonucleoprotein, eukaryotic and archaea-type, core	15	0.681818	1.00188e-10	SNRPD3, LSM6, LSM7, SNRPD1, SNRPD2, NAA38, LSM5, SNRPB, LSM4, LSM3, LSM2, LSM1, SNRPF, SNRPE, SNRPG	2002	18	17763	7.39386	2.58384e-07	2.58384e-07	1.77367e-07
[truncated: 3,645 more rows]

## Sheet: E10.5 FAC
Annotation Cluster 1	Enrichment Score: 13.45859108235287
[truncated: 3,221 more rows]

## Sheet: Ribosomal proteins
Gene Name	E8.5 FPKM	E10.5 FPKM	log2(fold_change)	Significant
[truncated: 89 more rows]

## Sheet: Ribosome Biogenesis
Gene Name	E8.5 FPKM	E10.5 FPKM	log2(fold_change)	Significant
[truncated: 191 more rows]

[truncated: 4 more sheets: Translation, Transcription Factors, Receptors, Secreted]
